# Supplementary material
Source: publisher figshare collection journal article supplement (https://acs.figshare.com/ndownloader/files/4466863)

---

## Supporting Information

---

### Stereospecific Synthesis of Cyclobutylboronates through Copper(I)-Catalyzed Reaction of Homoallylic Sulfonates and a Diboron Derivative

*Hajime Ito,\* Takashi Toyoda, and Masaya Sawamura*

Department of Chemistry, Faculty of Science, Hokkaido University, Sapporo 060-0810, Japan

PRESTO, Japan Science and Technology Agency (JST), Honcho, Kawaguchi, Saitama 332-0012, Japan

E-mail: hajito@sci.hokudai.ac.jp

|                                                                                          |          |
|------------------------------------------------------------------------------------------|----------|
| 1. General                                                                               | p S2     |
| 2. Preparation of Alkenyl Methanesulfonates                                              | p S2     |
| 3. Synthesis and Spectral Data for Homoallylic Methanesulfonates ( <b>1a–1h</b> )        | p S3–10  |
| 4. Copper(I)-catalyzed Reaction of Homoallylic Methanesulfonates with Diboron            | p S11    |
| 5. Spectral Data for Cycloalkylboronates ( <i>trans</i> - and <i>cis</i> - <b>3a–i</b> ) | p S11–19 |
| 6. Synthesis of <i>trans</i> - and <i>cis</i> - <b>4–8</b>                               | p S19–24 |
| 7. References                                                                            | p S25    |
| 8. <sup>1</sup> H and <sup>13</sup> C NMR Spectra                                        | p S26–99 |

## Experimental Section

**General Considerations.** Materials were obtained from commercial suppliers and purified by the standard procedure unless otherwise noted. Dry solvents were purchased from commercial suppliers and were degassed via three freeze-pump-thaw cycles and further dried on MS 4A. Phosphine ligands were purchased from commercial suppliers and used without further purification. Bis(pinacolato)diboron was purchased from AllyChem, Co., Ltd. (70,000 JPY/250 g) and purified by recrystallization from hot pentane. Copper(I) chloride (ReagentPlus grade) and THF solution of potassium *tert*-butoxide (1.0 M) were purchased from Aldrich Chemical Co. 1,4-Diisopropylbenzene for the internal standards in GC analysis were distilled from CaH<sub>2</sub> and stored on MS4A under an atmosphere of argon. Recycle gel-permeation chromatography was conducted using JAI LC-9101.

NMR spectra were recorded on Varian Gemini 2000 (<sup>1</sup>H: 300 MHz and <sup>13</sup>C: 75.4 MHz), JEOL EX-270 (<sup>1</sup>H: 270 MHz) or JEOL JNM-ECA600 (<sup>1</sup>H: 600 MHz, <sup>13</sup>C: 150.9 MHz) spectrometer. The NMR yields were determined by using mesitylene as the internal standard. GLC analyses were conducted on a Shimadzu GC-14B equipped with a flame ionization detector. IR spectra were recorded on a Perkin-Elmer Spectrum One. Low- and High-resolution mass spectra were recorded on a JEOL JMS-700TZ, JMS-T100L, JMS-T100GC, Thermo Fisher Scientific LTQ-Orbitrap XL, and Thermo Fisher Scientific Exactive mass spectrometer at the Center for Instrumental Analysis, Hokkaido University.

### Preparation of Alkenyl Alcohols.

The (*Z*)-alkenyl alcohols having a silyl group for preparation of (*Z*)-**1a**, **1b**, **1c**, **1i**, and **1j** were synthesized by DIBAL reduction of the corresponding silylalkynyl alcohols according to the similar procedure reported by Hosomi et al.<sup>1</sup> The (*E*)-alkenyl alcohols for preparation of (*E*)-**1a**, **1b**, **1c**, **1i**, and **1j** were synthesized by Bu<sub>3</sub>SnH-mediated isomerization reaction of the corresponding (*Z*)-alkenyl alcohols.<sup>1</sup> The (*Z*)-alkenyl alcohols for (*Z*)-**1d** and **1e** were prepared according to the reported by Denmark et al.<sup>2</sup> The (*Z*)-alkenyl alcohols for (*Z*)-**1f** was prepared by partial hydrogenation with Pd/CaCO<sub>3</sub> catalyst. The (*E*)-alkenyl alcohols for (*E*)-**1d**, **1e**, **1f**, and **1g** were prepared by using stereoselective reduction of the corresponding alkynyl alcohols with Red-Al.<sup>3</sup>

### Preparation of Homoallylic Methanesulfonates (**1a–1j**).

In a 100 mL round bottomed flask, a homoallylic alcohol (12.1 mmol) and pyridine (2.73g, 34.6 mmol) was dissolved in dry CH<sub>2</sub>Cl<sub>2</sub> (19 mL), then methanesulfonyl chloride (2.5 g, 21.8 mmol) was added dropwise to the reaction mixture at 0°C with stirring. After 3 h, the reaction mixture was quenched by water, extracted three times with CH<sub>2</sub>Cl<sub>2</sub> and the combined organic layer was dried over MgSO<sub>4</sub> and filtered. After the solvents were evaporated under reduced pressure, the crude product was

subjected to flash chromatography (SiO<sub>2</sub>, hexane/ethyl acetate, typically, 95:5–85:15) and further purified by bulb-to-bulb distillation under reduced pressure to give **1**.

**(Z)-4-(Dimethyl(phenyl)silyl)but-3-enyl methanesulfonate [(Z)-1a].**

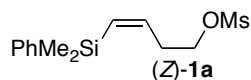

This compound was purified by flash chromatography (SiO<sub>2</sub>, hexane/ethyl acetate 95:5–85:15) and bulb-to-bulb distillation (bath temp. 200 °C, 3.0–4.3 Pa). (Z)-**1a** was obtained in a 51% yield from (Z)-4-(dimethyl(phenyl)silyl)but-3-en-1-ol. GLC analysis showed that the (Z)-**1a** contains less than 1% of (E)-**1a**. <sup>1</sup>H NMR (300 MHz, CDCl<sub>3</sub>, δ): 0.40 (s, 6H, –SiCH<sub>3</sub>), 2.46 (dt, *J* = 6.9, 1.1 Hz, 2H), 2.90 (s, 3H, –OSO<sub>2</sub>CH<sub>3</sub>), 4.11 (t, *J* = 6.8 Hz, 2H), 5.90 (d, *J* = 14.0 Hz, 1H, SiCH=CH), 6.37 (dt, *J* = 14.0, 6.9 Hz, 1H, –SiCH=CH–), 7.32–7.39 (m, 3H), 7.51–7.57 (m, 2H). <sup>13</sup>C NMR (75.4 MHz, CDCl<sub>3</sub>, δ): –1.32 (2C, –SiCH<sub>3</sub>), 32.8 (1C, CH<sub>2</sub>), 37.1 (1C, –OSO<sub>2</sub>CH<sub>3</sub>), 68.6 (1C, –CH<sub>2</sub>OSO<sub>2</sub>Me), 127.9 (2C, CH), 129.1 (1C, CH), 131.9 (1C, CH), 133.7 (2C, CH), 138.9 (1C, C), 143.2 (1C, CH). IR (neat, cm<sup>–1</sup>): 2958 (w), 2903 (w), 1610 (m), 1428 (w), 1353 (s), 1249 (m), 1172 (s), 778 (s). HRMS–ESI (*m/z*): [M+Na]<sup>+</sup> calcd for C<sub>13</sub>H<sub>20</sub>NaO<sub>3</sub>SSi, 307.0800; found, 307.0799. Anal. Calcd for C<sub>13</sub>H<sub>20</sub>O<sub>3</sub>SSi: C, 54.89; H, 7.09; S, 11.27. Found: C, 54.64; H, 6.95; S, 11.57.

**(E)-4-(Dimethyl(phenyl)silyl)but-3-enyl methanesulfonate [(E)-1a].**

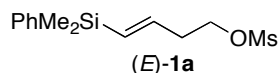

This compound was purified by flash chromatography (SiO<sub>2</sub>, hexane/ethyl acetate 98:2–90:10) and bulb-to-bulb distillation (bath temp. 198 °C, 10–14 Pa). The product was obtained in 65% yield from (E)-4-(dimethyl(phenyl)silyl)but-3-en-1-ol. GLC analysis showed that the (E)-**1a** contains 5% of (Z)-**1a**.

<sup>1</sup>H NMR (300 MHz, CDCl<sub>3</sub>, δ): 0.34 (s, 6H, –SiCH<sub>3</sub>), 2.60 (t, *J* = 6.6 Hz, 2H), 2.96 (s, 3H, –OSO<sub>2</sub>CH<sub>3</sub>), 4.29 (t, *J* = 6.7 Hz, 2H), 5.95 (d, *J* = 18.7 Hz, 1H, SiCH=CH), 6.05 (dt, *J* = 18.7, 5.5 Hz, 1H, SiCH=CH), 7.34–7.39 (m, 3H), 7.49–7.51 (m, 2H). <sup>13</sup>C NMR (75.4 MHz, CDCl<sub>3</sub>, δ): –2.94 (2C, –SiCH<sub>3</sub>), 35.9 (1C, CH<sub>2</sub>), 37.3 (1C, –OSO<sub>2</sub>CH<sub>3</sub>), 68.6 (1C, –CH<sub>2</sub>OSO<sub>2</sub>Me), 127.8 (2C, CH), 129.1 (1C, CH), 132.8 (1C, CH), 133.8 (2C, CH), 138.4 (1C, C), 141.8 (1C, CH). IR (neat, cm<sup>–1</sup>): 2957 (w), 2902 (w), 1618 (w), 1428 (m), 1353 (s), 1248 (m), 1171 (s), 820 (s). HRMS–ESI (*m/z*): [M+Na]<sup>+</sup> calcd for C<sub>13</sub>H<sub>20</sub>NaO<sub>3</sub>SSi, 307.0800; found, 307.0795. Anal. Calcd for C<sub>13</sub>H<sub>20</sub>O<sub>3</sub>SSi: C, 54.89; H, 7.09; S, 11.27. Found: C, 54.61; H, 7.06; S, 11.28.

**(Z)-4-(Trimethylsilyl)but-3-enyl methanesulfonate [(Z)-1b].**

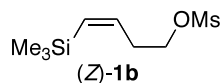

This compound was purified by flash chromatography (SiO<sub>2</sub>, hexane/ethyl acetate 97:3–91:9) and bulb-to-bulb distillation (bath temp. 135 °C, 9–14 Pa). The product was obtained in 99% yield from (Z)-4-(trimethylsilyl)but-3-en-1-ol. GLC analysis showed that the (Z)-**1b** contains less than 1% of (E)-**1b**.

<sup>1</sup>H NMR (300 MHz, CDCl<sub>3</sub>, δ): 0.14 (s, 9H, –SiCH<sub>3</sub>), 2.59 (dt, *J* = 6.9, 0.8 Hz, 2H), 3.01 (s, 3H, –OSO<sub>2</sub>CH<sub>3</sub>), 4.25 (t, *J* = 6.9 Hz, 2H), 5.73 (brd, *J* = 14.3 Hz, 1H, SiCH=CH), 6.24 (dt, *J* = 14.1, 7.1 Hz, 1H, SiCH=CH). <sup>13</sup>C NMR (75.4 MHz, CDCl<sub>3</sub>, δ): –0.1 (1C, –SiCH<sub>3</sub>), 32.8 (1C, CH<sub>2</sub>), 37.3 (1C, –OSO<sub>2</sub>CH<sub>3</sub>), 68.9 (1C, –CH<sub>2</sub>OSO<sub>2</sub>Me), 134.1 (1C, CH), 141.3 (1C, CH). IR (neat, cm<sup>–1</sup>): 2957 (w), 1610 (w), 1415 (w), 1353 (s), 1249 (m), 1171 (s), 834 (s). HRMS–ESI (*m/z*): [M+Na]<sup>+</sup> calcd for C<sub>8</sub>H<sub>18</sub>NaO<sub>3</sub>SSi, 245.0644; found, 245.0642. Anal. Calcd for C<sub>8</sub>H<sub>18</sub>O<sub>3</sub>SSi: C, 43.21; H, 8.16; S, 14.42. Found: C, 43.27; H, 7.97; S, 14.70.

**(E)-4-(Trimethylsilyl)but-3-enyl methanesulfonate [(E)-1b].**

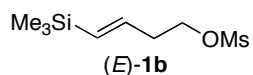

This compound was purified by flash chromatography (SiO<sub>2</sub>, hexane/ethyl acetate 97:3–85:15) and bulb-to-bulb distillation (bath temp. 135 °C, 5–8 Pa). The product was obtained in 99% yield from (E)-4-(trimethylsilyl)but-3-en-1-ol. GLC analysis showed that the (E)-**1b** contains 4% of (Z)-**1b**.

<sup>1</sup>H NMR (300 MHz, CDCl<sub>3</sub>, δ): 0.60 (s, 9H, –SiCH<sub>3</sub>), 2.57 (dq, *J* = 6.9, 1.1 Hz, 2H), 3.01 (s, 3H, –OSO<sub>2</sub>CH<sub>3</sub>), 4.28 (t, *J* = 6.9 Hz, 2H), 5.83 (d, *J* = 18.4 Hz, 1H, SiCH=CH), 5.98 (dt, *J* = 18.4, 6.9 Hz, 1H, SiCH=CH). <sup>13</sup>C NMR (75.4 MHz, CDCl<sub>3</sub>, δ): –1.6 (3C, –SiCH<sub>3</sub>), 35.9 (1C, CH<sub>2</sub>), 37.3 (1C, –OSO<sub>2</sub>CH<sub>3</sub>), 68.8 (1C, –CH<sub>2</sub>OSO<sub>2</sub>Me), 134.9 (1C, CH), 139.8 (1C, CH). IR (neat, cm<sup>–1</sup>): 2956 (m), 1619 (m), 1419 (w), 1353 (s), 1248 (m), 1171 (m), 834 (s). HRMS–ESI (*m/z*): [M+Na]<sup>+</sup> calcd for C<sub>8</sub>H<sub>18</sub>NaO<sub>3</sub>SSi, 245.0635; found, 245.0644. Anal. Calcd for C<sub>8</sub>H<sub>18</sub>O<sub>3</sub>SSi: C, 43.21; H, 8.16; S, 14.42. Found: C, 43.27; H, 8.04; S, 14.40.

**(Z)-4-(Benzyl(dimethyl)silyl)but-3-enyl methanesulfonate [(Z)-1c].**

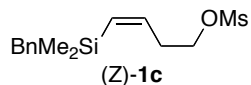

This compound was purified by flash chromatography (SiO<sub>2</sub>, hexane/ethyl acetate 97:3–50:50) and bulb-to-bulb distillation (bath temp. 200 °C, 4 Pa). The product was obtained in 79% yield from (Z)-4-(benzyl(dimethyl)silyl)but-3-en-1-ol. GLC analysis showed that the (Z)-**1c** contains 3% of (E)-**1c**.

$^1\text{H}$  NMR (300 MHz,  $\text{CDCl}_3$ ,  $\delta$ ): 0.13 (s, 6H,  $-\text{SiCH}_3$ ), 2.17 (s, 2H,  $\text{SiCH}_2\text{Ph}$ ), 2.42 (dt,  $J = 6.6, 1.4$  Hz, 2H,  $\text{CH}_2\text{CH}=\text{CH}$ ), 2.98 (s, 3H,  $-\text{OSO}_2\text{CH}_3$ ), 4.15 (t,  $J = 6.6$  Hz, 2H,  $\text{CH}_2\text{OMs}$ ), 5.69 (dt,  $J = 14.0, 1.4$  Hz, 1H,  $\text{SiCH}=\text{CH}$ ), 6.27 (dt,  $J = 14.3, 7.4$  Hz, 1H,  $\text{SiCH}=\text{CH}$ ), 6.95–7.13 (m, 3H,  $\text{ArH}$ ), 7.17–7.25 (m, 2H,  $\text{ArH}$ ).  $^{13}\text{C}$  NMR (75.4 MHz,  $\text{CDCl}_3$ ,  $\delta$ ):  $-2.0$  (2C,  $-\text{SiCH}_3$ ), 26.2 (1C,  $\text{CH}_2$ ), 32.9 (1C,  $-\text{OSO}_2\text{CH}_3$ ), 37.2 (1C,  $\text{CH}_2$ ), 68.7 (1C,  $-\text{CH}_2\text{OSO}_2\text{Me}$ ), 124.2 (1C, CH), 128.2 (2C, CH), 128.3 (2C, CH), 131.8 (1C, CH), 139.7 (1C, C), 142.6 (1C, CH). IR (neat,  $\text{cm}^{-1}$ ): 3025 (w), 2958 (w), 2897 (w), 1600 (m), 1493 (m), 1353 (s), 1249 (m), 1172 (s), 828 (s). HRMS–ESI ( $m/z$ ):  $[\text{M}+\text{Na}]^+$  calcd for  $\text{C}_{14}\text{H}_{22}\text{NaO}_3\text{SSi}$ , 321.0957; found, 321.0957.

**(*E*)-4-(Benzyl(dimethyl)silyl)but-3-enyl methanesulfonate [(*E*)-1c].**

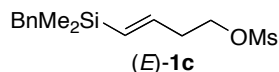

This compound was purified by flash chromatography ( $\text{SiO}_2$ , hexane/ethyl acetate 97:3–75:25) and bulb-to-bulb distillation (bath temp. 200 °C, 4 Pa). The product was obtained in 63% yield from (*E*)-4-(benzyl(dimethyl)silyl)but-3-en-1-ol. GLC analysis showed that the (*E*)-1c contains 4% of (*Z*)-1c.

$^1\text{H}$  NMR (300 MHz,  $\text{CDCl}_3$ ,  $\delta$ ): 0.04 (s, 6H,  $-\text{SiCH}_3$ ), 2.12 (s, 2H,  $\text{SiCH}_2\text{Ph}$ ), 2.54 (q,  $J = 6.9$  Hz, 2H,  $\text{CH}_2\text{CH}=\text{CH}$ ), 2.96 (s, 3H,  $-\text{OSO}_2\text{CH}_3$ ), 4.24 (t,  $J = 6.9$  Hz, 2H,  $\text{CH}_2\text{OMs}$ ), 5.78 (d,  $J = 18.7$  Hz, 1H,  $\text{SiCH}=\text{CH}$ ), 5.93 (dt,  $J = 18.7, 5.8$  Hz, 1H,  $\text{SiCH}=\text{CH}$ ), 6.95–7.11 (m, 3H), 7.16–7.27 (m, 2H).  $^{13}\text{C}$  NMR (75.4 MHz,  $\text{CDCl}_3$ ,  $\delta$ ):  $-3.7$  (2C,  $-\text{SiCH}_3$ ), 25.8 (1C,  $\text{CH}_2$ ), 36.0 (1C,  $\text{CH}_2$ ), 37.3 (1C,  $-\text{OSO}_2\text{CH}_3$ ), 68.6 (1C,  $-\text{CH}_2\text{OSO}_2\text{Me}$ ), 124.1 (1C, CH), 128.2 (2C, CH), 128.3 (2C, CH), 132.8 (1C, CH), 139.8 (1C, C), 141.2 (1C, CH). IR (neat,  $\text{cm}^{-1}$ ): 3025 (w), 2956 (w), 2897 (w), 1618 (w), 1493 (m), 1354 (s), 1248 (m), 1172 (s), 830 (s). HRMS–ESI ( $m/z$ ):  $[\text{M}+\text{Na}]^+$  calcd for  $\text{C}_{14}\text{H}_{22}\text{NaO}_3\text{SSi}$ , 321.0957; found, 321.0947. Anal. Calcd for  $\text{C}_{14}\text{H}_{22}\text{O}_3\text{SSi}$ : C, 56.34; H, 7.43; S, 10.74. Found: C, 56.11; H, 7.43; S, 10.90.

**(*Z*)-4-Phenylbut-3-enyl methanesulfonate [(*Z*)-1d].**

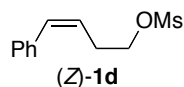

This compound was purified by flash chromatography ( $\text{SiO}_2$ , hexane/ethyl acetate 95:5–0:100) and bulb-to-bulb distillation (bath temp. 205 °C, 4–5 Pa). The product was obtained in 62% yield from (*Z*)-4-phenylbut-3-en-1-ol. NMR analysis shows that the (*Z*)-1d contains 4% of (*E*)-1d.  $^1\text{H}$  NMR (300 MHz,  $\text{CDCl}_3$ ,  $\delta$ ): 2.79 (dt,  $J = 6.6, 1.9$  Hz, 2H,  $\text{CH}_2\text{CH}=\text{CH}$ ), 2.99 (s, 3H,  $-\text{OSO}_2\text{CH}_3$ ), 4.30 (t,  $J = 6.6$  Hz, 2H,  $\text{CH}_2\text{OMs}$ ), 5.66 (dt,  $J = 11.8, 7.1$  Hz, 1H,  $\text{PhCH}=\text{CH}$ ), 6.62 (d,  $J = 11.8$  Hz, 1H,  $\text{PhCH}=\text{CH}$ ), 7.24–7.28 (m, 3H), 7.34–7.39 (m, 2H).  $^{13}\text{C}$  NMR (75.4 MHz,  $\text{CDCl}_3$ ,  $\delta$ ): 28.0 (1C,  $\text{CH}_2$ ), 36.8 (1C,  $-\text{OSO}_2\text{CH}_3$ ), 69.0 (1C,  $\text{CH}_2\text{OSO}_2\text{Me}$ ), 125.6 (1C, CH), 126.9 (1C, CH), 128.1 (2C, CH), 128.4 (2C, CH), 132.0 (1C,

CH), 136.5 (1C, C). IR (neat,  $\text{cm}^{-1}$ ): 3025 (w), 2940 (w), 1600 (w), 1493 (w), 1350 (s), 1213 (w), 1169 (s), 913 (s). HRMS–EI ( $m/z$ ):  $[M]^+$  calcd for  $\text{C}_{11}\text{H}_{14}\text{O}_3\text{S}$ , 226.0664; found, 226.0665. Anal. Calcd for  $\text{C}_{11}\text{H}_{14}\text{O}_3\text{S}$ : C, 58.38; H, 6.24; S, 14.17. Found: C, 58.32; H, 6.10; S, 14.45.

**(Z)-4-(4-Methylphenyl)but-3-enyl methanesulfonate [(Z)-1e].**

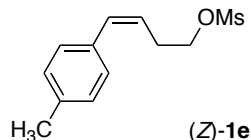

This compound was purified by flash chromatography ( $\text{SiO}_2$ , hexane/ethyl acetate 97:3–80:20) and bulb-to-bulb distillation (bath temp. 200 °C, 10–12 Pa). The product was obtained in 74% yield from (Z)-4-(4-methylphenyl)but-3-en-1-ol. GLC analysis shows that the (Z)-1e contains 13% of (E)-1e.

$^1\text{H}$  NMR (300 MHz,  $\text{CDCl}_3$ ,  $\delta$ ): 2.35 (s, 3H,  $p\text{-CH}_3\text{C}_6\text{H}_4$ ), 2.78 (dt,  $J = 6.9, 1.7$  Hz, 2H,  $\text{CH}_2\text{CH}=\text{CH}$ ), 2.99 (s, 3H,  $-\text{OSO}_2\text{CH}_3$ ), 4.30 (t,  $J = 6.6$  Hz, 2H,  $\text{CH}_2\text{OMs}$ ), 5.60 (dt,  $J = 11.5, 7.1$  Hz, 1H,  $p\text{-CH}_3\text{C}_6\text{H}_4\text{CH}=\text{CH}$ ), 6.58 (d,  $J = 11.5$  Hz, 1H,  $p\text{-CH}_3\text{-C}_6\text{H}_4\text{CH}=\text{CH}$ ), 7.16 (s, 4H).  $^{13}\text{C}$  NMR (75.4 MHz,  $\text{CDCl}_3$ ,  $\delta$ ): 20.9 (1C,  $p\text{-CH}_3\text{C}_6\text{H}_4$ ), 28.3 (1C,  $\text{CH}_2$ ), 37.2 (1C,  $-\text{OSO}_2\text{CH}_3$ ), 69.1 (1C,  $\text{CH}_2\text{OSO}_2\text{Me}$ ), 124.9 (1C, CH), 128.5 (2C, CH), 129.0 (2C, CH), 132.2 (1C, CH), 133.8 (1C, C), 136.9 (1C, C). IR (neat,  $\text{cm}^{-1}$ ): 3020 (w), 2940 (w), 1610 (w), 1512 (w), 1350 (s), 1169 (s), 914 (s). HRMS–EI ( $m/z$ ):  $[M]^+$  calcd for  $\text{C}_{12}\text{H}_{16}\text{O}_3\text{S}$ , 240.0820; found, 240.0821. Anal. Calcd for  $\text{C}_{12}\text{H}_{16}\text{O}_3\text{S}$ : C, 59.97; H, 6.71; S, 13.34. Found: C, 59.80; H, 6.69; S, 13.50.

**(Z)-4-(4-Trifluoromethylphenyl)but-3-enyl methanesulfonate [(Z)-1f].**

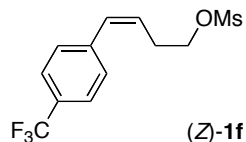

This compound was purified by flash chromatography ( $\text{SiO}_2$ , hexane/ethyl acetate 96:4–75:25) and subsequent bulb-to-bulb distillation (bath temp. 195 °C, 13–17 Pa). The product was obtained in 61% yield from (Z)-4-(4-trifluoromethylphenyl)but-3-en-1-ol. GLC analysis shows that the (Z)-1f contains 12% of (E)-1f.  $^1\text{H}$  NMR (300 MHz,  $\text{CDCl}_3$ ,  $\delta$ ): 2.77 (dt,  $J = 6.6, 1.7$  Hz, 2H,  $\text{CH}_2\text{CH}=\text{CH}$ ), 3.01 (s, 3H,  $-\text{OSO}_2\text{CH}_3$ ), 4.31 (t,  $J = 6.6$  Hz, 2H,  $\text{CH}_2\text{OMs}$ ), 5.78 (dt,  $J = 11.6, 6.6$ , 1H,  $p\text{-CF}_3\text{C}_6\text{H}_4\text{CH}=\text{CH}$ ), 6.65 (d,  $J = 11.6$  Hz, 1H,  $p\text{-CF}_3\text{-C}_6\text{H}_4\text{CH}=\text{CH}$ ), 7.36 (d,  $J = 8.3$  Hz, 2H), 7.61 (d,  $J = 8.2$  Hz, 2H).  $^{13}\text{C}$  NMR (75.4 MHz,  $\text{CDCl}_3$ ,  $\delta$ ): 28.4 (1C,  $\text{CH}_2$ ), 37.4 (1C,  $-\text{OSO}_2\text{CH}_3$ ), 68.6 (1C,  $\text{CH}_2\text{OSO}_2\text{Me}$ ), 125.4 (q,  $J = 4.0$  Hz, 2C, CH), 127.7 (q,  $J = 258.8$  Hz, 1C,  $\text{CF}_3$ ), 127.9 (1C, CH), 128.9 (2C, CH), 131.3 (1C, CH), 140.3 (1C, C). IR (neat,  $\text{cm}^{-1}$ ): 3027 (w), 2945 (w), 1617 (w), 1321 (s), 1167 (s), 1110 (s). HRMS–EI

(*m/z*): [M+Na]<sup>+</sup> calcd for C<sub>12</sub>H<sub>13</sub>F<sub>3</sub>NaO<sub>3</sub>S, 317.04297 found, 317.04297. Anal. Calcd for C<sub>12</sub>H<sub>13</sub>O<sub>3</sub>F<sub>3</sub>S: C, 48.97; H, 4.45; S, 10.90. Found: C, 48.79; H, 4.47; S, 11.10.

**(*E*)-4-Phenylbut-3-enyl methanesulfonate [(*E*)-1d].**

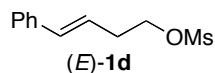

This compound was purified by flash chromatography (SiO<sub>2</sub>, hexane/ethyl acetate 95:5–50:50) and bulb-to-bulb distillation (bath temp. 185 °C, 4 Pa). The product was obtained in 61% yield from (*E*)-4-phenylbut-3-en-1-ol. GLC analysis shows that the (*E*)-1d contains less than 3% of (*Z*)-1d.

<sup>1</sup>H NMR (300 MHz, CDCl<sub>3</sub>, δ): 2.67 (dt, *J* = 6.9, 1.4 Hz, 2H, CH<sub>2</sub>CH=CH), 3.02 (s, 3H, –OSO<sub>2</sub>CH<sub>3</sub>), 4.34 (t, *J* = 6.6 Hz, 2H, CH<sub>2</sub>OMs), 6.16 (dt, *J* = 15.9, 7.1 Hz, 1H, PhCH=CH–), 6.53 (d, *J* = 15.9 Hz, 1H, PhCH=CH–), 7.20–7.35 (m, 5H). <sup>13</sup>C NMR (75.4 MHz, CDCl<sub>3</sub>, δ): 32.2 (1C, CH<sub>2</sub>), 36.8 (1C, –OSO<sub>2</sub>CH<sub>3</sub>), 68.8 (1C, CH<sub>2</sub>OSO<sub>2</sub>Me), 123.6 (1C, CH), 125.8 (2C, CH), 127.2 (1C, CH), 128.2 (2C, CH), 133.1 (1C, CH), 136.5 (1C, C). IR (neat, cm<sup>–1</sup>): 3027 (w), 2940 (w), 1598 (w), 1494 (w), 1348 (s), 1169 (s), 956 (s). HRMS–EI (*m/z*): [M]<sup>+</sup> calcd for C<sub>11</sub>H<sub>14</sub>O<sub>3</sub>S, 226.0664; found, 226.0664.

**(*E*)-4-(4-Methylphenyl)but-3-enyl methanesulfonate [(*E*)-1e].**

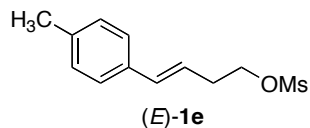

This compound was purified by flash chromatography (SiO<sub>2</sub>, hexane/ethyl acetate 98:2–84:16) and dried under vacuum for 16 h before use. The product was obtained in 97% yield from (*E*)-4-(4-methylphenyl)but-3-en-1-ol. GLC analysis shows that the (*E*)-1e contains <1% of (*Z*)-1e. <sup>1</sup>H NMR (300 MHz, CDCl<sub>3</sub>, δ): 2.33 (s, 3H, *p*-CH<sub>3</sub>-C<sub>6</sub>H<sub>4</sub>), 2.66 (dt, *J* = 6.9, 1.1 Hz, 2H, CH<sub>2</sub>CH=CH), 3.01 (s, 3H, –OSO<sub>2</sub>CH<sub>3</sub>), 4.33 (t, *J* = 6.6 Hz, 2H, CH<sub>2</sub>OMs), 6.10 (dt, *J* = 15.9, 6.9 Hz, 1H, *p*-CH<sub>3</sub>C<sub>6</sub>H<sub>4</sub>CH=CH), 6.49 (d, *J* = 15.7 Hz, 1H, *p*-CH<sub>3</sub>C<sub>6</sub>H<sub>4</sub>CH=CH), 7.12 (d, *J* = 8.0 Hz, 2H), 7.25 (d, *J* = 7.1 Hz, 2H). <sup>13</sup>C NMR (75.4 MHz, CDCl<sub>3</sub>, δ): 20.9 (1C, *p*-CH<sub>3</sub>C<sub>6</sub>H<sub>4</sub>), 32.5 (1C, CH<sub>2</sub>CH<sub>2</sub>OSO<sub>2</sub>Me), 37.1 (1C, –OSO<sub>2</sub>CH<sub>3</sub>), 69.1 (1C, CH<sub>2</sub>OSO<sub>2</sub>Me), 122.6 (1C, CH), 126.0 (2C, CH), 129.2 (2C, CH), 133.3 (1C, CH), 134.0 (1C, C), 137.3 (1C, C). IR (neat, cm<sup>–1</sup>): 3022 (w), 2941 (w), 1512 (w), 1330 (s), 1167 (s), 925 (s). HRMS–EI (*m/z*): [M]<sup>+</sup> calcd for C<sub>12</sub>H<sub>16</sub>O<sub>3</sub>S, 240.0820; found, 240.0818. Anal. Calcd for C<sub>12</sub>H<sub>16</sub>O<sub>3</sub>S: C, 59.97; H, 6.71. Found: C, 59.90; H, 6.59.

**(*E*)-4-(4-Trifluoromethylphenyl)but-3-enyl methanesulfonate [(*E*)-1f].**

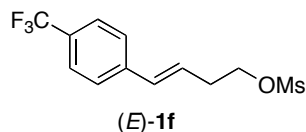

This compound was purified by flash chromatography (SiO<sub>2</sub>, hexane/ethyl acetate 95:5–85:15) subsequent recycle gel-permeation chromatography (JAI LC-9101, CHCl<sub>3</sub>) and dried under vacuum for 16 h before use. The product was obtained in 8% yield from (*E*)-4-(4-(trifluoromethylphenyl)but-3-en-1-ol. GLC analysis shows that the (*E*)-**1f** contains <1% of (*Z*)-**1f**. <sup>1</sup>H NMR (300 MHz, CDCl<sub>3</sub>, δ): 2.71 (q, *J* = 6.6 Hz, 2H, CH<sub>2</sub>CH=CH), 3.03 (s, 3H, –OSO<sub>2</sub>CH<sub>3</sub>), 4.36 (t, *J* = 6.6 Hz, 2H, CH<sub>2</sub>OMs), 6.28 (dt, *J* = 15.9, 6.9 Hz, 1H, *p*-CF<sub>3</sub>C<sub>6</sub>H<sub>4</sub>CH=CH), 6.56 (d, *J* = 15.7 Hz, 1H, *p*-CF<sub>3</sub>C<sub>6</sub>H<sub>4</sub>CH=CH), 7.45 (d, *J* = 8.3 Hz, 2H), 7.57 (d, *J* = 8.3 Hz, 2H). <sup>13</sup>C NMR (75.4 MHz, CDCl<sub>3</sub>, δ): 32.7 (1C, CH<sub>2</sub>), 37.4 (1C, –OSO<sub>2</sub>CH<sub>3</sub>), 68.6 (1C, CH<sub>2</sub>OSO<sub>2</sub>Me), 125.4 (q, *J* = 4.0 Hz, 2C, CH), 126.0 (q, *J* = 272.5 Hz, 1C, CH), 126.4 (2C, CH), 126.8 (1C, CH), 132.3 (1C, CH), 140.4 (1C, C). IR (neat, cm<sup>–1</sup>): 3030 (w), 2947 (w), 1611 (w), 1323 (s), 1154 (s). HRMS–EI (*m/z*): [M+Na]<sup>+</sup> calcd for C<sub>12</sub>H<sub>13</sub>F<sub>3</sub>NaO<sub>3</sub>S, 317.0430; found, 317.0432. Anal. Calcd for C<sub>12</sub>H<sub>13</sub>F<sub>3</sub>O<sub>3</sub>S: C, 48.97; H, 4.45; S, 10.90. Found: C, 49.20; H, 4.40; S, 10.90.

**(*E*)-4-(4-Methoxyphenyl)but-3-enyl methanesulfonate [(*E*)-1g].**

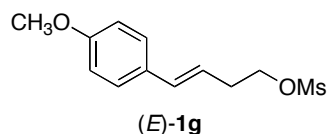

This compound was purified by flash chromatography (SiO<sub>2</sub>, hexane/ethyl acetate 97:3–80:20), subsequent recycle gel-permeation chromatography (JAI LC-9101, CHCl<sub>3</sub>) and dried under vacuum for 16 h before use. The product was obtained in 39% yield from (*E*)-4-(4-methoxyphenyl)but-3-en-1-ol. GLC analysis shows that the (*E*)-**1g** contains 3% of (*Z*)-**1g**. <sup>1</sup>H NMR (300 MHz, CDCl<sub>3</sub>, δ): 2.64 (dt, *J* = 6.8, 1.1 Hz, 2H, CH<sub>2</sub>CH=CH), 3.01 (s, 3H, –OSO<sub>2</sub>CH<sub>3</sub>), 3.81 (s, 3H, *p*-CH<sub>3</sub>OC<sub>6</sub>H<sub>4</sub>), 4.32 (t, *J* = 6.6 Hz, 2H, CH<sub>2</sub>OMs), 6.01 (dt, *J* = 15.9, 7.1 Hz, 1H, *p*-CH<sub>3</sub>OC<sub>6</sub>H<sub>4</sub>CH=CH), 6.46 (d, *J* = 16.0 Hz, 1H, *p*-CH<sub>3</sub>OC<sub>6</sub>H<sub>4</sub>CH=CH), 6.83–6.88 (m, 2H), 7.26–7.31 (m, 2H). <sup>13</sup>C NMR (75.4 MHz, CDCl<sub>3</sub>, δ): 32.6 (1C, CH<sub>2</sub>), 37.3 (1C, –OSO<sub>2</sub>CH<sub>3</sub>), 55.1 (1C, *p*-CH<sub>3</sub>OC<sub>6</sub>H<sub>4</sub>), 69.3 (1C, CH<sub>2</sub>OSO<sub>2</sub>Me), 114.0 (2C, CH), 121.5 (1C, CH), 127.3 (2C, CH), 129.6 (1C, C), 132.9 (1C, CH), 159.2 (1C, C). IR (neat, cm<sup>–1</sup>): 3028 (w), 2939 (w), 1510 (w), 1348 (s), 1166 (s), 919 (s). HRMS–EI (*m/z*): [M]<sup>+</sup> calcd for C<sub>12</sub>H<sub>16</sub>O<sub>4</sub>S, 256.0769; found, 256.0767. Anal. Calcd for C<sub>12</sub>H<sub>16</sub>O<sub>4</sub>S: C, 56.23; H, 6.29; S, 12.51. Found: C, 56.12; H, 6.29; S, 12.23.

**(*Z*)-Oct-3-enyl methanesulfonate [(*Z*)-1h].**



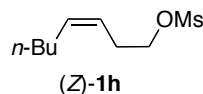

This compound was purified by flash chromatography (SiO<sub>2</sub>, hexane/ethyl acetate 95:5–50:50) and bulb-to-bulb distillation (bath temp. 155 °C, 4 Pa). The product was obtained in 92% yield from (Z)-3-hepten-1-ol. GLC analysis shows that the (Z)-**1h** contains less than 1% of (E)-**1h**.

<sup>1</sup>H NMR (300 MHz, CDCl<sub>3</sub>, δ): 0.87–0.97 (m, 3H, CH<sub>2</sub>CH<sub>3</sub>), 1.29–1.40 (m, 4H, CH<sub>2</sub>CH<sub>2</sub>CH<sub>3</sub>), 2.05 (dd, *J* = 5.8, 6.9 Hz, 2H, CH<sub>2</sub>CH=CH), 2.51 (dd, *J* = 6.6, 0.3 Hz, 2H, CH=CHCH<sub>2</sub>CH<sub>2</sub>O), 3.01 (s, 3H, –OSO<sub>2</sub>CH<sub>3</sub>), 4.21 (t, *J* = 6.9 Hz, 2H, CH<sub>2</sub>OMs), 5.28–5.39 (m, 1H, *n*-BuCH=CH), 5.53–5.62 (m, 1H, *n*-BuCH=CH). <sup>13</sup>C NMR (75.4 MHz, CDCl<sub>3</sub>, δ): 13.6 (1C, CH<sub>3</sub>), 22.0 (1C, CH<sub>2</sub>), 26.7 (1C, CH<sub>2</sub>), 27.0 (1C, CH<sub>2</sub>), 31.3 (1C, CH<sub>2</sub>), 37.1 (1C, –OSO<sub>2</sub>CH<sub>3</sub>), 69.2 (1C, CH<sub>2</sub>OSO<sub>2</sub>Me), 122.6 (1C, *n*-BuCH=CH), 134.0 (1C, *n*-BuCH=CH). IR (neat, cm<sup>–1</sup>): 2958 (m), 2930 (m), 2861 (m), 1655 (w), 1467 (m), 1351 (s), 1171 (s), 952 (s). HRMS–EI (*m/z*): [M]<sup>+</sup> calcd for C<sub>9</sub>H<sub>18</sub>O<sub>3</sub>S, 206.0977; found, 206.0981.

**(Z)-4-(Dimethyl(phenyl)silyl)pent-3-enyl methanesulfonate [(Z)-1i].**

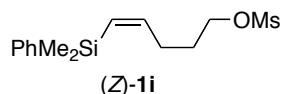

This compound was purified by flash chromatography (SiO<sub>2</sub>, hexane/ethyl acetate 98:2–0:100) and bulb-to-bulb distillation (bath temp. 190 °C, 4.2 Pa). The product was obtained in 52% yield. GLC analysis shows that the (Z)-**1i** contains 1% of (E)-**1i**. <sup>1</sup>H NMR (300 MHz, CDCl<sub>3</sub>, δ): 0.38 (s, 6H), 1.67–1.77 (m, 2H, CH<sub>2</sub>), 2.08–2.19 (m, 2H, CH<sub>2</sub>), 2.89 (s, 3H, OSO<sub>2</sub>CH<sub>3</sub>), 4.03 (t, *J* = 6.7 Hz, 2H, CH=CHCH<sub>2</sub>CH<sub>2</sub>O), 5.74 (dt, *J* = 14.0 Hz, 1H, SiCH=CH), 6.37 (dt, *J* = 14.0 Hz, 1H, SiCH=CH), 7.31–7.39 (m, 3H), 7.51–7.58 (m, 2H). <sup>13</sup>C NMR (75.4 MHz, CDCl<sub>3</sub>, δ): –1.3 (2C, SiCH<sub>3</sub>), 28.6 (1C, CH<sub>2</sub>), 29.2 (1C, CH<sub>2</sub>), 37.1 (1C, CH<sub>2</sub>), 69.2 (1C, CH<sub>2</sub>O), 127.9 (2C, CH), 128.8 (1C, CH), 129.0 (1C, CH), 133.7 (2C, CH), 139.3 (1C, C), 148.1 (1C, CH). IR (neat, cm<sup>–1</sup>): 3022 (m), 2956 (m), 1617 (m), 1352 (s), 1172 (w), 923 (s). HRMS–EI (*m/z*): [M]<sup>+</sup> calcd for C<sub>13</sub>H<sub>19</sub>O<sub>3</sub>SSi, 283.0824; found, 283.0824. Anal. Calcd for C<sub>14</sub>H<sub>22</sub>O<sub>3</sub>SSi: C, 56.34; H, 7.43; S, 10.74. Found: C, 56.14; H, 7.45; S, 10.99.

**(E)-4-(Dimethyl(phenyl)silyl)pent-3-enyl methanesulfonate [(E)-1i].**

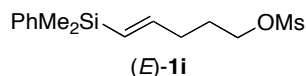

This compound was purified by flash chromatography (SiO<sub>2</sub>, hexane/ethyl acetate 94:6–85:15) and bulb-to-bulb distillation (bath temp. 200 °C, 6 Pa). GLC analysis shows that the (E)-**1i** contains 5% of (Z)-**1i**. <sup>1</sup>H NMR (300 MHz, CDCl<sub>3</sub>, δ): 0.33 (s, 6H), 1.82–1.93 (m, 2H, CH<sub>2</sub>), 2.22–2.32 (m, 2H, CH<sub>2</sub>), 2.95 (s, 3H, OSO<sub>2</sub>CH<sub>3</sub>), 4.22 (t, *J* = 6.5 Hz, 2H, CH=CHCH<sub>2</sub>CH<sub>2</sub>O), 5.83 (dt, *J* = 18.7, 1.1 Hz, 1H,

SiCH=CH), 6.07 (dt,  $J = 18.4, 1.1$  Hz, 1H, SiCH=CH), 7.32–7.38 (m, 3H), 7.47–7.54 (m, 2H).  $^{13}\text{C}$  NMR (75.4 MHz,  $\text{CDCl}_3$ ,  $\delta$ ): –2.7 (2C, SiCH<sub>3</sub>), 27.8 (1C, CH<sub>2</sub>), 32.2 (1C, CH<sub>2</sub>), 37.2 (1C, CH<sub>2</sub>), 69.3 (1C, CH<sub>2</sub>O), 127.9 (2C, CH), 129.1 (1C, CH), 129.7 (1C, CH), 133.9 (2C, CH), 138.9 (1C, C), 146.5 (1C, CH). IR (neat,  $\text{cm}^{-1}$ ): 3022 (m), 2956 (m), 1617 (m), 1352 (s), 1172 (w), 923 (s). HRMS–EI ( $m/z$ ):  $[\text{M}]^+$  calcd for  $\text{C}_{13}\text{H}_{19}\text{O}_3\text{SSi}$ , 283.0824; found, 283.0823. Anal. Calcd for  $\text{C}_{14}\text{H}_{22}\text{O}_3\text{SSi}$ : C, 56.34; H, 7.43; S, 10.74. Found: C, 56.14; H, 7.40; S, 10.45.

### General Procedure for Copper(I)-catalyzed Reaction.

In a reaction vial, CuCl (2.5 mg, 0.025 mmol), dppp (10.3 mg, 0.025 mmol) and bis(pinacolato)diboron (253.9 mg, 1.00 mmol) were placed. After being sealed with a screw cap, the vial was connected to a argon line through a needle. The vial was evacuated and backfilled with argon and THF solution of potassium *tert*-butoxide (1.0 M, 0.5 mL, 0.5 mmol) was then added with stirring. After 30 min, a homoallylic methanesulfonate **1** (0.5 mmol) was added with vigorous stirring at room temperature. The poor stirring or use of a large excess of potassium *tert*-butoxide (>1.5 equiv) caused low trans/cis selectivities of the products. The reaction mixture became viscous after several hours. The completion of the reaction was checked by GC or TLC, the mixture was directly subjected to short column path of silica gel by using hexane/ethyl acetate (80:20) as the eluent. The trans/cis ratio was determined by GLC analysis of the crude product. After removal of the solvents under reduced pressure, the crude product was purified with flash chromatography (SiO<sub>2</sub>, hexane/ethyl acetate, 100:0–96:4) to give the corresponding cyclobutylboronates.

### *trans*-1-Dimethyl(phenyl)silyl-2-(4,4,5,5-tetramethyl-1,3,2-dioxaborolan-2-yl)cyclobutane (*trans*-**3a**).

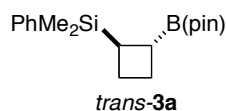

<sup>1</sup>H NMR (300 MHz, CDCl<sub>3</sub>, δ): 0.24 (s, 3H, –SiCH<sub>3</sub>), 0.25 (s, 3H, –SiCH<sub>3</sub>), 1.20 (s, 12H, CH<sub>3</sub>), 1.86–2.22 (m, 6H), 7.31–7.34 (m, 3H), 7.49–7.52 (m, 2H). <sup>13</sup>C NMR (75.4 MHz, CDCl<sub>3</sub>, δ): –5.4 (1C, SiCH<sub>3</sub>), –5.2 (1C, SiCH<sub>3</sub>), 19.2 (br, 1C, CHB), 23.4 (1C, CH<sub>2</sub>), 23.7 (1C, CHSi), 24.0 (1C, CH<sub>2</sub>), 24.5 (2C, –OC(CH<sub>3</sub>)<sub>2</sub>), 24.6 (2C, –OC(CH<sub>3</sub>)<sub>2</sub>), 82.8 (2C, –OC(CH<sub>3</sub>)<sub>2</sub>), 127.6 (2C, CH), 128.7 (1C, CH), 133.9 (2C, CH), 138.9 (1C, C). IR (neat, cm<sup>–1</sup>): 3069 (m), 2957 (m), 2862 (m), 1377 (s), 1314 (s), 1247 (s), 1143 (s), 698 (s). HRMS–EI (*m/z*): [M]<sup>+</sup> calcd for C<sub>18</sub>H<sub>29</sub>BO<sub>2</sub>Si, 316.2030; found, 316.2027. The stereochemistry of this compound was determined by nOe experiment with the acetate derivative after H<sub>2</sub>O<sub>2</sub>/NaOH aq. oxidation as shown in the following figure.

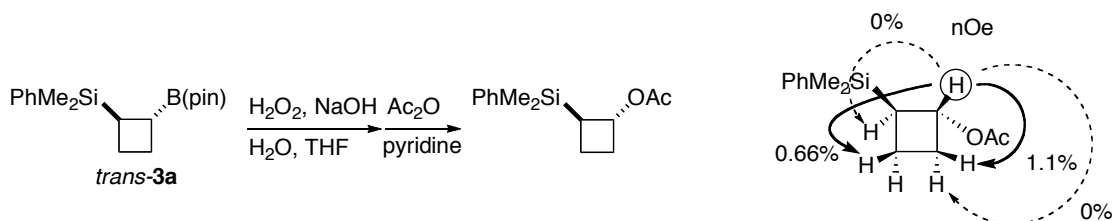

### *cis*-1-Dimethyl(phenyl)silyl-2-(4,4,5,5-tetramethyl-1,3,2-dioxaborolan-2-yl)cyclobutane (*cis*-**3a**).

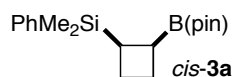

$^1\text{H}$  NMR (300 MHz,  $\text{CDCl}_3$ ,  $\delta$ ): 0.33 (s, 3H,  $-\text{SiCH}_3$ ), 0.36 (s, 3H,  $-\text{SiCH}_3$ ), 1.15 (d, 6H,  $\text{CCH}_3$ ), 1.17 (d, 6H,  $\text{CCH}_3$ ), 1.91–2.06 (m, 2H), 2.09–2.17 (m, 1H), 2.19–2.32 (m, 3H), 7.26–7.32 (m, 3H), 7.47–7.50 (m, 2H).  $^{13}\text{C}$  NMR (75.4 MHz,  $\text{CDCl}_3$ ,  $\delta$ ): –3.7 (1C,  $\text{SiCH}_3$ ), –3.5 (1C,  $\text{SiCH}_3$ ), 23.6 (1C,  $\text{SiCH}$ ), 24.1 (1C,  $\text{CH}_2$ ), 24.2 (1C,  $\text{CH}_2$ ), 24.77 (2C,  $-\text{OC}(\text{CH}_3)_2$ ), 24.82 (2C,  $-\text{OC}(\text{CH}_3)_2$ ), 82.9 (2C,  $-\text{OC}(\text{CH}_3)_2$ ), 127.6 (2C, CH), 128.6 (1C, CH), 133.9 (2C, CH), 140.2 (1C, C). The carbon directly attached to the boron atom was not detected, likely due to quadrupolar relaxation.<sup>4,5</sup> IR (neat,  $\text{cm}^{-1}$ ): 3069 (m), 2977 (m), 2865 (m), 1372 (s), 1315 (s), 1246 (s), 1142 (s), 698 (s). HRMS–EI ( $m/z$ ):  $[\text{M}-\text{CH}_3]^+$  calcd for  $\text{C}_{17}\text{H}_{26}\text{BO}_2\text{Si}$ , 301.1795; found, 301.1790.

The stereochemistry of this compound was determined by nOe experiment with the 3,5-dinitrobenzoate derivative after  $\text{H}_2\text{O}_2/\text{NaOH}$  aq. oxidation as shown in the following figure.

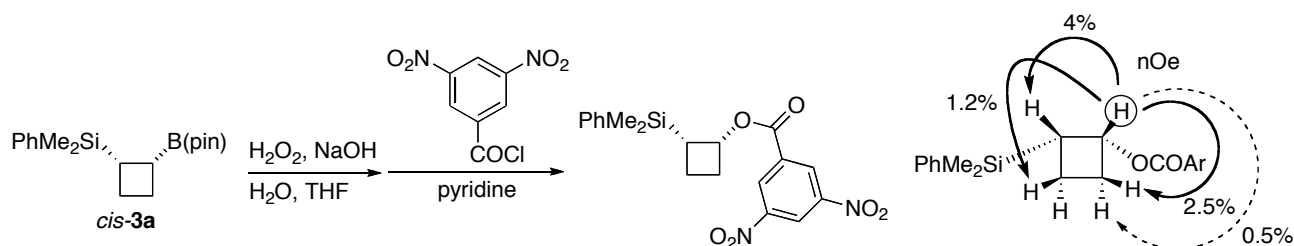

***trans*-1-Trimethylsilyl-2-(4,4,5,5-tetramethyl-1,3,2-dioxaborolan-2-yl)cyclobutane (*trans*-3b).**

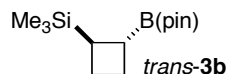

$^1\text{H}$  NMR (300 MHz,  $\text{CDCl}_3$ ,  $\delta$ ): –0.05 (s, 9H,  $-\text{SiCH}_3$ ), 1.24 (s, 12H,  $\text{CH}_3$ ), 1.73–1.83 (m, 2H), 1.92–2.03 (m, 3H), 2.12–2.22 (m, 1H).  $^{13}\text{C}$  NMR (75.4 MHz,  $\text{CDCl}_3$ ,  $\delta$ ): –3.9 (3C,  $\text{SiCH}_3$ ), 19.0 (br, 1C, CHB), 23.1 (1C,  $\text{CH}_2$ ), 23.8 (1C,  $\text{CH}_2$ ), 24.55 (2C,  $-\text{OC}(\text{CH}_3)_2$ ), 24.57 (2C,  $-\text{OC}(\text{CH}_3)_2$ ), 24.7 (1C,  $\text{SiCH}$ ), 82.8 (2C,  $-\text{OC}(\text{CH}_3)_2$ ). IR (neat,  $\text{cm}^{-1}$ ): 2978 (m), 2862 (m), 1372 (s), 1314 (s), 1247 (s), 1144 (s), 833 (s). HRMS–EI ( $m/z$ ):  $[\text{M}]^+$  calcd for  $\text{C}_{13}\text{H}_{27}\text{BO}_2\text{Si}$ , 254.1873; found, 254.1869.

***cis*-1-Trimethylsilyl-2-(4,4,5,5-tetramethyl-1,3,2-dioxaborolan-2-yl)cyclobutane (*cis*-3b).**

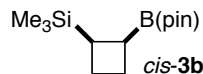

$^1\text{H}$  NMR (300 MHz,  $\text{CDCl}_3$ ,  $\delta$ ): 0.03 (s, 9H,  $-\text{SiCH}_3$ ), 1.25 (s, 12H,  $\text{CH}_3$ ), 1.79–1.89 (m, 2H), 1.94–2.13 (m, 2H), 2.16–2.36 (m, 2H).  $^{13}\text{C}$  NMR (75.4 MHz,  $\text{CDCl}_3$ ,  $\delta$ ): –2.4 (3C,  $\text{SiCH}_3$ ), 19.5 (br, 1C, CHB), 23.84 (1C,  $\text{CH}_2$ ), 23.89 (1C,  $\text{CH}_2$ ), 24.7 (1C,  $\text{SiCH}$ ), 24.9 (2C,  $-\text{OC}(\text{CH}_3)_2$ ), 25.0 (2C,  $-\text{OC}(\text{CH}_3)_2$ ), 82.9 (2C,  $-\text{OC}(\text{CH}_3)_2$ ). IR (neat,  $\text{cm}^{-1}$ ): 2952 (m), 2864 (m), 1372 (s), 1310 (s), 1245 (s), 1143 (s), 832 (s). MS–EI ( $m/z$ ):  $[\text{M}-\text{CH}_3]^+$  calcd for  $\text{C}_{12}\text{H}_{24}\text{BO}_2\text{Si}$ , 239.2; found, 239.2.

***trans*-1-Benzyl(dimethyl)silyl-2-(4,4,5,5-tetramethyl-1,3,2-dioxaborolan-2-yl)cyclobutane (*trans*-3c).**

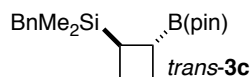

$^1\text{H}$  NMR (300 MHz,  $\text{CDCl}_3$ ,  $\delta$ ):  $-0.07$  (s, 3H,  $-\text{SiCH}_3$ ),  $-0.05$  (s, 3H,  $-\text{SiCH}_3$ ),  $1.25$  (s, 12H,  $\text{CH}_3$ ),  $1.81$ – $2.05$  (m, 5H),  $2.06$  (s, 2H,  $-\text{CH}_2\text{Ph}$ ),  $2.13$ – $2.22$  (m, 1H),  $6.99$ – $7.07$  (m, 3H),  $7.17$ – $7.21$  (m, 2H).  $^{13}\text{C}$  NMR (75.4 MHz,  $\text{CDCl}_3$ ,  $\delta$ ):  $-6.1$  (1C,  $\text{SiCH}_3$ ),  $-5.8$  (1C,  $\text{SiCH}_3$ ),  $19.0$  (br, 1C, CHB),  $23.1$  (1C,  $\text{CH}_2$ ),  $23.9$  (1C,  $\text{CH}_2$ ),  $24.6$  (4C,  $-\text{OC}(\text{CH}_3)_2$ ),  $82.9$  (2C,  $-\text{OC}(\text{CH}_3)_2$ ),  $123.8$  (1C, CH),  $128.1$  (2C, CH),  $128.2$  (2C, CH),  $140.6$  (1C, C). IR (neat,  $\text{cm}^{-1}$ ):  $3025$  (w),  $2977$  (m),  $1444$  (m),  $1372$  (s),  $1316$  (m),  $1144$  (s),  $827$  (s). HRMS–EI ( $m/z$ ):  $[\text{M}+\text{H}]^+$  for  $\text{C}_{19}\text{H}_{32}\text{BO}_2\text{Si}$ ,  $331.2265$ ; found,  $331.2261$ .  $[\text{M}-\text{CH}_3]^+$  for  $\text{C}_{18}\text{H}_{28}\text{BO}_2\text{Si}$ ,  $315.1952$ ; found,  $315.1949$ .

***cis*-1-Benzyl(dimethyl)silyl-2-(4,4,5,5-tetramethyl-1,3,2-dioxaborolan-2-yl)cyclobutane (*cis*-3c).**

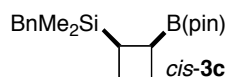

$^1\text{H}$  NMR (300 MHz,  $\text{CDCl}_3$ ,  $\delta$ ):  $-0.01$  (s, 3H,  $-\text{SiCH}_3$ ),  $0.04$  (s, 3H,  $-\text{SiCH}_3$ ),  $1.27$  (s, 12H,  $\text{CH}_3$ ),  $1.82$ – $1.92$  (m, 2H),  $1.94$ – $2.07$  (m, 1H),  $2.07$ – $2.29$  (m, 5H),  $6.99$ – $7.07$  (m, 3H),  $7.17$ – $7.22$  (m, 2H).  $^{13}\text{C}$  NMR (75.4 MHz,  $\text{CDCl}_3$ ,  $\delta$ ):  $-4.8$  (1C,  $\text{SiCH}_3$ ),  $-4.5$  (1C,  $\text{SiCH}_3$ ),  $19.5$  (br, 1C, CHB),  $23.0$  (1C,  $\text{CH}_2$ ),  $23.8$  (1C,  $\text{CH}_2$ ),  $24.1$  (1C,  $\text{CH}_2$ ),  $24.7$  (1C, SiCH),  $24.9$  (2C,  $-\text{OC}(\text{CH}_3)_2$ ),  $25.0$  (2C,  $-\text{OC}(\text{CH}_3)_2$ ),  $83.0$  (2C,  $-\text{OC}(\text{CH}_3)_2$ ),  $123.7$  (1C, CH),  $128.1$  (2C, CH),  $128.2$  (2C, CH),  $141.0$  (1C, C). IR (neat,  $\text{cm}^{-1}$ ):  $3060$  (w),  $2977$  (m),  $1447$  (w),  $1379$  (s),  $1318$  (m),  $1142$  (s),  $694$  (s). HRMS–ESI ( $m/z$ ):  $[\text{M}+\text{Na}]^+$  for  $\text{C}_{19}\text{H}_{31}\text{BNaO}_2\text{Si}$ ,  $353.20841$ ; found,  $353.20786$ .

***trans*-1-Phenyl-2-(4,4,5,5-tetramethyl-1,3,2-dioxaborolan-2-yl)cyclobutane (*trans*-3d).**

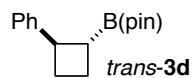

The yield of this product was determined by  $^1\text{H}$  NMR in the crude mixture (89%). The purification with  $\text{SiO}_2$  flash chromatography resulted in partial decomposition of the product with a small amount of impurities (typically  $< 5\%$ ). The further purification was carried out with gel permeation chromatography to afford isomerically pure *trans*-3d in 51% yield (*trans*/*cis*  $>99:1$ ).

$^1\text{H}$  NMR (300 MHz,  $\text{CDCl}_3$ ,  $\delta$ ):  $1.26$  (s, 12H,  $\text{CH}_3$ ),  $1.90$ – $2.10$  (m, 3H),  $2.23$ – $2.40$  (m, 2H),  $3.55$ – $3.66$  (m, 1H),  $7.10$ – $7.31$  (m, 5H).  $^{13}\text{C}$  NMR (75.4 MHz,  $\text{CDCl}_3$ ,  $\delta$ ):  $19.7$  (1C,  $\text{CH}_2$ ),  $24.7$  (4C,  $-\text{OC}(\text{CH}_3)_2$ ),  $29.6$  (1C,  $\text{CH}_2$ ),  $41.4$  (1C,  $\text{CHPh}$ ),  $83.1$  (2C,  $-\text{OC}(\text{CH}_3)_2$ ),  $125.6$  (1C, CH),  $126.2$  (2C, CH),  $128.2$  (2C, CH),  $146.6$  (1C, C). The carbon directly attached to the boron atom was not detected, likely due to

quadrupolar relaxation.<sup>4,5</sup> IR (neat,  $\text{cm}^{-1}$ ): 2976 (m), 2936 (m), 1380 (s), 1314 (s), 1142 (s), 697 (s). HRMS–EI ( $m/z$ ):  $[\text{M}]^+$  calcd for  $\text{C}_{16}\text{H}_{23}\text{BO}_2$ , 258.1791; found, 258.1783.

The stereochemistry of *trans*-**3d** was confirmed by stereospecific derivatization to the corresponding alcohol through  $\text{H}_2\text{O}_2/\text{NaOH}$  aq. The stereochemical assignments are inconsistent with those reported, where detailed characterization was not shown.<sup>7</sup> Our nOe experiments for *trans*-**3d** represent the stereochemical configuration of them.

***trans*-2-Phenylcyclobutan-1-ol.**

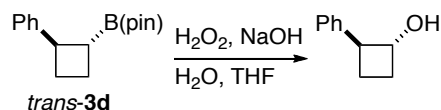

$^1\text{H}$  NMR (300 MHz,  $\text{CDCl}_3$ ,  $\delta$ ): 1.26 (s, 1H, OH), 1.54–1.68 (m, 1H), 1.79–1.94 (m, 1H), 2.00–2.16 (m, 1H), 2.23–2.35 (m, 1H), 3.27 (q,  $J = 9.0$  Hz, 1H), 4.29 (q,  $J = 8.6$  Hz, 1H), 7.15–7.40 (m, 5H).  $^{13}\text{C}$  NMR (75.4 MHz,  $\text{CDCl}_3$ ,  $\delta$ ): 18.4 (1C,  $\text{CH}_2$ ), 29.5 (1C,  $\text{CH}_2$ ), 51.7 (1C, CH), 73.6 (1C, CHOH), 126.4 (1C, CH), 126.7 (2C, CH), 128.5 (2C, CH), 142.8 (1C, C). IR (neat,  $\text{cm}^{-1}$ ): 3304 (br), 3028 (m), 2979 (m), 2945 (m), 1444 (s), 1101 (s), 739 (s), 696 (s). HRMS–EI ( $m/z$ ):  $[\text{M}]^+$  calcd for  $\text{C}_{10}\text{H}_{12}\text{O}$ , 148.0888; found, 148.0885.

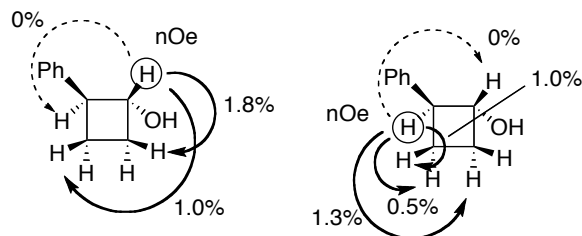

***trans*-1-(4-Methylphenyl)-2-(4,4,5,5-tetramethyl-1,3,2-dioxaborolan-2-yl)cyclobutane (*trans*-**3e**).**

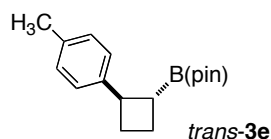

The yield of this product was determined by  $^1\text{H}$  NMR in the crude mixture (76%). In this case, the starting material. The purification with  $\text{SiO}_2$  flash chromatography resulted in partial decomposition of the product with a small amount of impurities (typically <5%). The further purification was carried out with recycle gel permeation chromatography (JAI LC-9101,  $\text{CHCl}_3$ ) to afford isomerically pure *trans*-**3e** in 55% yield (*trans/cis* >99:1).  $^1\text{H}$  NMR (300 MHz,  $\text{CDCl}_3$ ,  $\delta$ ): 1.25 (s, 12H,  $\text{CH}_3$ ), 1.90–2.07 (m, 3H), 2.19–2.41 (m, 2H), 2.31 (s, 3H,  $-\text{CH}_3$ ), 3.52–3.61 (m, 1H), 7.07–7.15 (m, 4H).  $^{13}\text{C}$  NMR (75.4 MHz,  $\text{CDCl}_3$ ,  $\delta$ ): 19.7 (1C,  $\text{CH}_2$ ), 20.9 (1C,  $p\text{-CH}_3\text{C}_6\text{H}_4$ ), 24.6 (4C,  $-\text{OC}(\text{CH}_3)_2$ ), 27.0 (br, 1C, CHB), 29.7 (1C,  $\text{CH}_2$ ), 41.2 (1C, CHPh), 83.0 (2C,  $-\text{OC}(\text{CH}_3)_2$ ), 126.1 (2C, CH), 128.9 (2C, CH), 135.0 (1C, C),

143.6 (1C, C). The carbon directly attached to the boron atom was not detected, likely due to quadrupolar relaxation.<sup>4,5</sup> IR (neat, cm<sup>-1</sup>): 2975 (m), 2934 (m), 1380 (s), 1314 (s), 1144 (s), 854 (s). HRMS–EI (*m/z*): [M]<sup>+</sup> calcd for C<sub>17</sub>H<sub>25</sub>BO<sub>2</sub>, 272.1948; found, 272.1951. Anal. Calcd for C<sub>17</sub>H<sub>25</sub>BO<sub>2</sub>: C, 75.01; H, 9.26. Found: C, 75.16; H, 9.42.

***trans*-1-(4-Trifluoromethylphenyl)-2-(4,4,5,5-tetramethyl-1,3,2-dioxaborolan-2-yl)cyclobutane (*trans*-3f).**

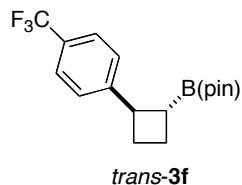

The yield of this product was determined by <sup>1</sup>H NMR in the crude mixture (28%). The purification with SiO<sub>2</sub> flash chromatography resulted in partial decomposition of the product with a small amount of impurities (typically <5%). <sup>1</sup>H NMR (270 MHz, CDCl<sub>3</sub>, δ): 1.27 (s, 12H, CH<sub>3</sub>), 1.90–2.14 (m, 3H), 2.20–2.42 (m, 2H), 3.55–3.70 (m, 1H), 7.32 (d, *J* = 8.8 Hz, 2H), 7.53 (d, *J* = 8.8 Hz, 2H). <sup>13</sup>C NMR (150.9 MHz, CDCl<sub>3</sub>, δ): 19.8 (1C, CH<sub>2</sub>), 24.8 (4C, –OC(CH<sub>3</sub>)<sub>2</sub>), 27.0 (br, 1C, CHB), 29.5 (1C, CH<sub>2</sub>), 41.3 (1C, CHPh), 83.2 (2C, –OC(CH<sub>3</sub>)<sub>2</sub>), 124.4 (q, *J* = 271.8 Hz, 1C, CF<sub>3</sub>), 125.1 (q, *J* = 3.5 Hz, 2C, CH), 126.4 (2C, CH), 127.8 (q, *J* = 33.2 Hz, 1C, C), 150.5 (1C, C). IR (neat, cm<sup>-1</sup>): 2979 (m), 1619 (m), 1384 (s), 1325 (s), 1124 (s), 839 (m). HRMS–EI (*m/z*): [M–CH<sub>3</sub>]<sup>+</sup> calcd for C<sub>16</sub>H<sub>19</sub>BF<sub>3</sub>O<sub>2</sub>, 311.1430; found, 311.1429.

***cis*-1-Phenyl-2-(4,4,5,5-tetramethyl-1,3,2-dioxaborolan-2-yl)cyclobutane (*cis*-3d).**

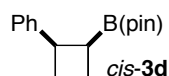

The yield of this product was determined by <sup>1</sup>H NMR in the crude mixture (63%). The purification with SiO<sub>2</sub> flash chromatography resulted in partial decomposition of the product with a small amount of impurities (typically <5%). The further purification was carried out with gel permeation chromatography to afford isomerically pure *cis*-3d in 62 % (trans/cis >99:1).

<sup>1</sup>H NMR (300 MHz, CDCl<sub>3</sub>, δ): 0.92 (s, 6H, CH<sub>3</sub>), 0.95 (s, 6H, CH<sub>3</sub>), 1.92–2.04 (m, 1H), 2.06–2.19 (m, 1H), 2.24–2.42 (m, 2H), 2.56–2.56 (quint, *J* = 9.6 Hz, 1H), 3.82 (q, *J* = 9.2 Hz, 1H), 7.08–7.14 (m, 1H), 7.22–7.27 (m, 4H). <sup>13</sup>C NMR (75.4 MHz, CDCl<sub>3</sub>, δ): 19.5 (1C, CH<sub>2</sub>), 24.46 (2C, –OC(CH<sub>3</sub>)<sub>2</sub>), 24.52 (2C, –OC(CH<sub>3</sub>)<sub>2</sub>), 26.0 (1C, CH<sub>2</sub>), 40.9 (1C, CHPh), 82.6 (2C, –OC(CH<sub>3</sub>)<sub>2</sub>), 125.5 (1C, CH), 126.9 (2C, CH), 127.8 (2C, CH), 145.0 (1C, C). The carbon directly attached to the boron atom was not detected, likely due to quadrupolar relaxation.<sup>4,5</sup> IR (neat, cm<sup>-1</sup>): 2977 (m), 2938 (m), 1379 (s), 1319 (s),

1142 (s), 694 (s). MS–EI ( $m/z$ ):  $[M]^+$  calcd for  $C_{16}H_{23}BO_2$ , 258.1791; found, 258.1792. Anal. Calcd for  $C_{16}H_{23}BO_2$ : C, 74.44; H, 8.98. Found: C, 74.20; H, 9.09.

The stereochemistry of *cis*-**3d** was confirmed by stereospecific derivatization to the corresponding alcohol through  $H_2O_2/NaOH$  aq. The stereochemical assignments are inconsistent with those reported, where detailed characterization was not shown.<sup>7</sup> Our nOe experiments for *cis*-**3d** represent the stereochemical configuration of them.

***cis*-2-Phenylcyclobutan-1-ol.**

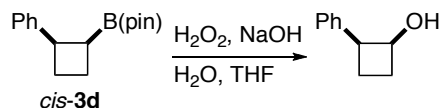

$^1H$  NMR (300 MHz,  $CDCl_3$ ,  $\delta$ ): 1.25 (s, 1H, OH), 1.89–2.00 (m, 1H), 2.03–2.15 (m, 1H), 2.23–2.32 (m, 1H), 2.34–2.44 (m, 1H), 3.70–3.74 (m, 1H, CHPh), 4.41–4.51 (m, 1H, CHOH), 7.21–7.28 (m, 3H), 7.33–7.38 (m, 2H).  $^{13}C$  NMR (75.4 MHz,  $CDCl_3$ ,  $\delta$ ): 19.8 (1C,  $CH_2$ ), 30.7 (1C,  $CH_2$ ), 46.8 (1C, CH), 69.2 (1C, CHOH), 126.6 (1C, CH), 128.5 (2C, CH), 128.6 (2C, CH), 138.4 (1C, C). IR (neat,  $cm^{-1}$ ): 3391 (br), 3027 (m), 2941 (m), 1602 (s), 1494 (s), 1104 (s), 697 (s). HRMS–EI ( $m/z$ ):  $[M]^+$  calcd for  $C_{10}H_{12}O$ , 148.0888; found, 148.0885.

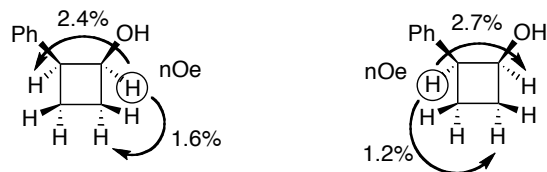

***cis*-1-(4-Methylphenyl)-2-(4,4,5,5-tetramethyl-1,3,2-dioxaborolan-2-yl)cyclobutane (*cis*-**3e**).**

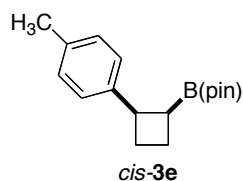

The yield of this product was determined by  $^1H$  NMR in the crude mixture (70%). The purification with  $SiO_2$  flash chromatography resulted in partial decomposition of the product with a small amount of impurities (typically <5%). The further purification was carried out with gel permeation chromatography to afford isomerically pure *cis*-**3e** (trans/*cis* 1:>99).

$^1H$  NMR (300 MHz,  $CDCl_3$ ,  $\delta$ ): 0.93 (s, 6H,  $CH_3$ ), 0.97 (s, 6H,  $CH_3$ ), 1.93–2.01 (m, 1H), 2.05–2.17 (m, 1H), 2.24–2.33 (m, 2H), 2.28 (s, 3H), 2.52 (quint, 1H), 3.78 (q,  $J = 9.3$  Hz, 1H), 7.05 (d,  $J = 8.0$  Hz, 2H), 7.13 (d,  $J = 8.0$  Hz, 2H).  $^{13}C$  NMR (150.9 MHz,  $CDCl_3$ ,  $\delta$ ): 19.5 (1C,  $CH_2$ ), 20.9 (1C,  $p-CH_3C_6H_4-$ ), 24.5 (2C,  $-OC(CH_3)_2$ ), 24.6 (2C,  $-OC(CH_3)_2$ ), 26.3 (1C,  $CH_2$ ), 40.7 (1C, CHPh), 82.7 (2C,  $-OC(CH_3)_2$ ),



126.9 (2C, CH), 128.5 (2C, CH), 135.0 (1C, C), 142.1 (1C, C). The carbon directly attached to the boron atom was not detected, likely due to quadrupolar relaxation.<sup>4,5</sup> IR (neat, cm<sup>-1</sup>): 2976 (m), 2938 (m), 1379 (s), 1318 (s), 1143 (s), 813 (s). HRMS–EI (*m/z*): [M]<sup>+</sup> calcd for C<sub>17</sub>H<sub>25</sub>BO<sub>2</sub>, 272.1948; found, 272.1948. Anal. Calcd for C<sub>17</sub>H<sub>25</sub>BO<sub>2</sub>: C, 75.01; H, 9.26. Found: C, 74.99; H, 9.48.

***cis*-1-(4-Trifluoromethylphenyl)-2-(4,4,5,5-tetramethyl-1,3,2-dioxaborolan-2-yl)cyclobutane (*cis*-3f).**

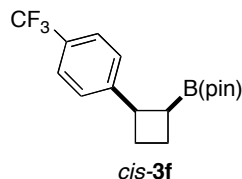

The yield of this product was determined by <sup>1</sup>H NMR in the crude mixture (39%). The further purification was carried out with SiO<sub>2</sub> flash chromatography to afford *cis*-3f in 32%. <sup>1</sup>H NMR (300 MHz, CDCl<sub>3</sub>, δ): 0.92 (s, 6H, CH<sub>3</sub>), 0.94 (s, 6H, CH<sub>3</sub>), 1.95–2.02 (m, 1H), 2.11–2.23 (m, 1H), 2.29–2.44 (m, 2H), 2.56 (quint, *J* = 9.9 Hz, 1H), 3.86 (q, *J* = 9.3 Hz, 1H), 7.33 (d, *J* = 8.3 Hz, 2H), 7.51 (d, *J* = 8.0 Hz, 2H). <sup>13</sup>C NMR (150.9 MHz, CDCl<sub>3</sub>, δ): 19.7 (1C, CH<sub>2</sub>), 24.56 (2C, –OC(CH<sub>3</sub>)<sub>2</sub>), 24.60 (2C, –OC(CH<sub>3</sub>)<sub>2</sub>), 26.1 (1C, CH<sub>2</sub>), 40.8 (1C, CHPh), 82.9 (2C, –OC(CH<sub>3</sub>)<sub>2</sub>), 122.3 (q, *J* = 271.8 Hz, 1C, CF<sub>3</sub>), 124.7 (q, *J* = 3.5 Hz, 2C, CH), 127.2, 128.0, 129.1, 149.3 (1C, C). IR (neat, cm<sup>-1</sup>): 2978 (m), 1618 (m), 1325 (s), 1124 (m). HRMS–EI (*m/z*): [M–CH<sub>3</sub>]<sup>+</sup> calcd for C<sub>16</sub>H<sub>19</sub>BF<sub>3</sub>O<sub>2</sub>, 311.1430; found, 311.1432.

***cis*-1-(4-Methoxyphenyl)-2-(4,4,5,5-tetramethyl-1,3,2-dioxaborolan-2-yl)cyclobutane (*cis*-3g).**

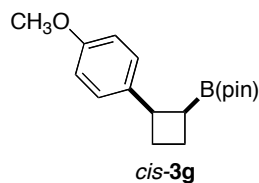

The yield of this product was determined by <sup>1</sup>H NMR in the crude mixture (60%). The purification with SiO<sub>2</sub> flash chromatography resulted in partial decomposition of the product with a small amount of impurities (typically <5%). The further purification was carried out with gel permeation chromatography to afford pure *cis*-3g in 41% yield.

<sup>1</sup>H NMR (300 MHz, CDCl<sub>3</sub>, δ): 0.95 (s, 6H, CH<sub>3</sub>), 0.98 (s, 6H, CH<sub>3</sub>), 1.93–2.01 (m, 1H), 2.02–2.17 (m, 1H), 2.22–2.38 (m, 2H), 2.51 (q, 10.2 Hz, 1H), 3.71–3.83 (m, 1H), 3.77 (s, 3H), 6.77–6.83 (m, 2H), 7.13–7.20 (m, 2H). <sup>13</sup>C NMR (75.4 MHz, CDCl<sub>3</sub>, δ): 19.4 (1C, CH<sub>2</sub>), 24.5 (2C, –OC(CH<sub>3</sub>)<sub>2</sub>), 24.6 (2C, –OC(CH<sub>3</sub>)<sub>2</sub>), 26.4 (1C, CH<sub>2</sub>), 40.4 (1C, CHPh), 55.3 (1C, *p*-CH<sub>3</sub>OC<sub>6</sub>H<sub>4</sub>–), 82.7 (2C, –OC(CH<sub>3</sub>)<sub>2</sub>), 113.3 (2C, CH), 128.0 (2C, CH), 137.4 (1C, C), 157.8 (1C, C). The carbon directly attached to the boron atom was not detected, likely due to quadrupolar relaxation.<sup>4,5</sup> IR (neat, cm<sup>-1</sup>): 2976 (m), 2937 (m), 1511 (m),

1379 (s), 1318 (s), 1145 (s), 828 (s). HRMS–EI ( $m/z$ ):  $[M]^+$  calcd for  $C_{17}H_{25}BO_3$ , 288.1897; found, 288.1897. Anal. Calcd for  $C_{17}H_{25}BO_3$ : C, 70.85; H, 8.74. Found: C, 71.01; H, 8.86.

***trans*-1-Dimethyl(phenyl)silyl-2-(4,4,5,5-tetramethyl-1,3,2-dioxaborolan-2-yl)cyclopentane**

**(*trans*-3i).**

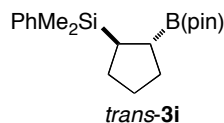

The yield of this product was determined by  $^1H$  NMR in the crude mixture (68%). The diastereoselectivity was determined by GLC analysis (trans/cis 97:3). The purification with  $SiO_2$  flash chromatography resulted in partial decomposition of the product with a small amount of impurities. The further purification was carried out with gel permeation chromatography to afford *trans*-3i in 45%.

$^1H$  NMR (300 MHz,  $CDCl_3$ ,  $\delta$ ): 0.24 (s, 3H,  $-SiCH_3$ ), 0.25 (s, 3H,  $-SiCH_3$ ), 1.16 (s, 12H,  $CH_3$ ), 1.21–1.61 (m, 6H), 1.69–1.82 (m, 2H), 7.31–7.33 (m, 3H), 7.52–7.55 (m, 2H).  $^{13}C$  NMR (75.4 MHz,  $CDCl_3$ ,  $\delta$ ): –4.7 (1C,  $SiCH_3$ ), –4.1 (1C,  $SiCH_3$ ), 24.6 (4C,  $-OC(CH_3)_2$ ), 27.0 (1C,  $CHSi$ ), 28.5 (1C,  $CH_2$ ), 29.7 (1C,  $CH_2$ ), 30.9 (1C,  $CH_2$ ), 82.8 (2C,  $-OC(CH_3)_2$ ), 127.6 (2C, CH), 128.7 (1C, CH), 134.2 (2C, CH), 139.3 (1C, C). The carbon directly attached to the boron atom was not detected, likely due to quadrupolar relaxation.<sup>4,5</sup> IR (neat,  $cm^{-1}$ ): 3070 (w), 2976 (m), 2854 (m), 1326 (s), 1312 (s), 1211 (m), 1142 (s), 699 (s). HRMS–EI ( $m/z$ ):  $[M-CH_3]^+$  calcd for  $C_{18}H_{28}BO_2Si$ , 315.1952; found, 315.1950.

***cis*-1-Dimethyl(phenyl)silyl-2-(4,4,5,5-tetramethyl-1,3,2-dioxaborolan-2-yl)cyclobutane (*cis*-3i).**

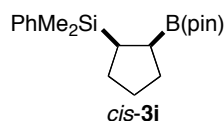

The yield of this product was determined by the  $^1H$  NMR spectrum of the crude mixture (78%). The diastereoselectivity was determined by GLC analysis (trans/cis 4:96). The purification with  $SiO_2$  flash chromatography resulted in partial decomposition of the product with a small amount of impurities. Repeated flash chromatography purification afforded *cis*-3i in 28%.

$^1H$  NMR (300 MHz,  $CDCl_3$ ,  $\delta$ ): 0.30 (s, 3H,  $-SiCH_3$ ), 0.34 (s, 3H,  $-SiCH_3$ ), 1.15 (s, 6H,  $CCH_3$ ), 1.17 (s, 6H,  $CCH_3$ ), 1.05–1.20 (m, 1H), 1.20–1.34 (m, 1H), 1.42–1.81 (m, 6H), 7.27–7.37 (m, 3H), 7.51–7.60 (m, 2H).  $^{13}C$  NMR (75.4 MHz,  $CDCl_3$ ,  $\delta$ ): –3.1 (1C,  $SiCH_3$ ), –2.9 (1C,  $SiCH_3$ ), 24.5 (2C,  $-OC(CH_3)_2$ ), 24.8 (2C,  $-OC(CH_3)_2$ ), 26.0 (1C,  $CH_2$ ), 28.1 (1C,  $CH_2$ ), 29.2 (1C,  $CHSiMe_2Ph$ ), 30.0 (1C,  $CH_2$ ), 82.7 (2C,  $-OC(CH_3)_2$ ), 127.6 (2C, CH), 128.4 (1C, CH), 133.8 (2C, CH), 141.1 (1C, C). The carbon directly attached to the boron atom was not detected, likely due to quadrupolar relaxation.<sup>4,5</sup> IR (neat,  $cm^{-1}$ ):

3069 (m), 2977 (m), 2866 (m), 1379 (s), 1313 (s), 1246 (s), 1142 (s), 698 (s). HRMS–EI ( $m/z$ ):  $[M-CH_3]^+$  calcd for  $C_{18}H_{28}BO_2Si$ , 315.1952; found, 315.1954.

**Stereoselective synthesis of *trans*-1-hydroxy-2-(benzoyloxymethyl)cyclobutane (*trans*-5).**

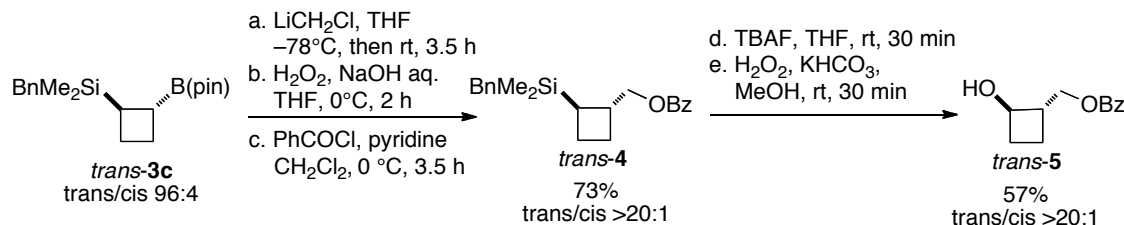

Bromochloromethane (205 mg, 1.58 mmol) and *trans*-3c (332 mg, 1.0 mmol) were dissolved in dry THF (8.0 mL) under an argon atmosphere. The mixture was cooled to  $-78^\circ\text{C}$ , then *n*-BuLi (1.65 M, 0.8 mL, 1.32 mmol) was added to the mixture with stirring. The mixture was stirred at  $-78^\circ\text{C}$  for 10 min, warmed to room temperature, and stirred for 3.5 h. The reaction was quenched with  $\text{NH}_4\text{Cl}$  aq., extracted three times with ethyl acetate, washed with brine, dried over  $\text{Na}_2\text{SO}_4$ , and filtered. The crude product obtained after evaporation was dissolved in THF (2.0 mL) and cooled to  $0^\circ\text{C}$ . 30%  $\text{H}_2\text{O}_2$  (1.6 mL) and NaOH aq. (3.0 M, 1.6 mL) were added dropwise to the stirred solution. After 2 h, the reaction mixture was diluted by adding water, and saturated  $\text{Na}_2\text{SO}_4$ , extracted three times with  $\text{CH}_2\text{Cl}_2$ , washed with water, dried over  $\text{MgSO}_4$ , and filtered. The solvent was removed under reduced pressure. The resultant product was subjected to esterification using pyridine (264 mg, 3.34 mmol) and benzoyl chloride (312 mg, 2.22 mmol) in dry  $\text{CH}_2\text{Cl}_2$  at  $0^\circ\text{C}$ . After 3.5 h, the reaction was quenched by water, extracted three times with  $\text{CH}_2\text{Cl}_2$ , dried over  $\text{MgSO}_4$ , and filtered. After evaporation, the crude product was purified by flash chromatography ( $\text{SiO}_2$ , ethyl acetate/hexane 0:100–4:96) to give *trans*-1-(benzyldimethylsilyl)-2-(benzoyloxymethyl)cyclobutane (*trans*-4) as a colorless oil (248 mg, 0.73 mmol, 73% for three steps). The diastereomeric ratio was determined by GLC analysis (trans/cis >20:1).  $^1\text{H}$  NMR (300 MHz,  $\text{CDCl}_3$ ,  $\delta$ ):  $-0.01$  (s, 3H),  $0.00$  (s, 3H),  $1.55$ – $1.69$  (m, 1H),  $1.72$ – $1.84$  (m, 1H),  $1.88$ – $2.20$  (m, 3H),  $2.09$  (s, 2H),  $2.55$ – $2.67$  (m, 1H),  $4.26$  (d,  $J = 6.6$  Hz, 2H),  $6.92$ – $7.10$  (m, 3H),  $7.14$ – $7.23$  (m, 2H),  $7.41$ – $7.48$  (m, 2H),  $7.51$ – $7.60$  (m, 1H),  $8.00$ – $8.10$  (m, 2H).  $^{13}\text{C}$  NMR (75.4 MHz,  $\text{CDCl}_3$ ,  $\delta$ ):  $-5.8$  (1C,  $\text{SiCH}_3$ ),  $-5.4$  (1C,  $\text{SiCH}_3$ ),  $19.2$  (1C,  $\text{CH}_2$ ),  $23.7$  (1C, CH),  $24.0$  (1C,  $\text{CH}_2$ ),  $24.8$  (1C,  $\text{CH}_2$ ),  $34.9$  (1C, CH),  $69.2$  (1C,  $\text{CH}_2\text{O}$ ),  $123.9$  (1C, CH),  $128.0$  (2C, CH),  $128.2$  (2C, CH),  $128.3$  (2C, CH),  $129.6$  (2C, CH),  $130.4$  (1C, C),  $132.8$  (1C, CH),  $140.0$  (1C, C),  $166.8$  (1C, C). HRMS–ESI ( $m/z$ ):  $[M+\text{Na}]^+$  calcd for  $\text{C}_{21}\text{H}_{26}\text{NaO}_2\text{Si}$ , 361.15998; found, 361.15989.

A THF solution of tetrabutylammonium fluoride (1.0 M, 0.75 mL, 0.75 mmol) was added to a solution of *trans*-4 (33.8 mg, 0.10 mmol) in THF (1.6 mL) with stirring at room temperature. After 30

min, methanol (0.7 mL),  $\text{KHCO}_3$  (38.2 mg, 0.38 mmol), and 30%  $\text{H}_2\text{O}_2$  (0.4 mL) were successively added to the reaction mixture. After 30 min, the reaction mixture was diluted with water, extracted three times with  $\text{CH}_2\text{Cl}_2$ , washed with water, dried over  $\text{MgSO}_4$ , and filtered. After evaporation, the crude product was purified by flash chromatography ( $\text{SiO}_2$ , ethyl acetate/hexane 20:80–100:0) to give *trans*-1-hydroxy-2-(benzoyloxymethyl)cyclobutane (*trans*-**5**) as a colorless oil (11.7 mg, 0.057 mmol, 57%). The diastereomeric ratio was determined by  $^1\text{H}$  NMR (*trans*/*cis* >20:1).  $^1\text{H}$  NMR (300 MHz,  $\text{CDCl}_3$ ,  $\delta$ ): 1.30–1.41 (m, 1H), 1.72–1.92 (m, 2H), 2.18–2.30 (m, 1H), 2.45–2.30 (m, 1H), 4.09–4.19 (m, 1H), 4.35 (d,  $J = 5.8$  Hz, 1H), 7.40–7.48 (m, 2H), 7.53–7.61 (m, 1H), 8.00–8.08 (m, 2H).  $^{13}\text{C}$  NMR (75.4 MHz,  $\text{CDCl}_3$ ,  $\delta$ ): 15.0 (1C,  $\text{CH}_2$ ), 29.4 (1C,  $\text{CH}_2$ ), 45.9 (1C, CH), 66.1 (1C,  $\text{CH}_2$ ), 69.7 (1C, CH), 128.5 (2C, CH), 129.7 (2C, CH), 130.3 (1C, C), 133.1 (1C, CH), 167.0 (1C, C). HRMS–ESI ( $m/z$ ):  $[\text{M}+\text{Na}]^+$  calcd for  $\text{C}_{12}\text{H}_{14}\text{NaO}_3$ , 229.0835; found, 229.0836.

### Stereoselective synthesis of *cis*-1-hydroxy-2-(benzoyloxymethyl)cyclobutane (*cis*-**5**).

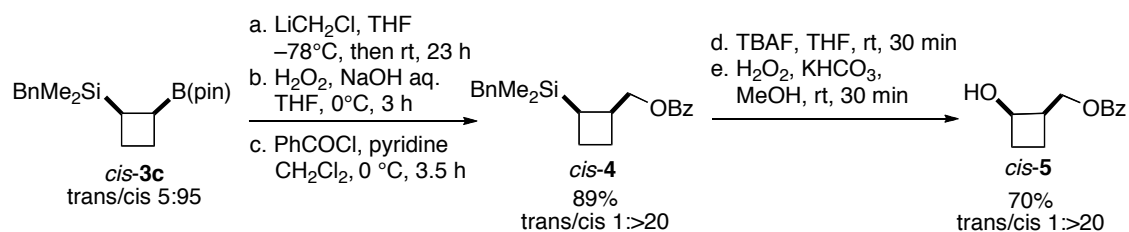

Bromochloromethane (38.6 mg, 0.30 mmol) and *trans*-**3c** (65.7 mg, 0.20 mmol) were dissolved in dry THF (1.6 mL) under an argon atmosphere. The mixture was cooled to  $-78^\circ\text{C}$ , then *n*-BuLi (1.57 M, 0.19 mL, 0.30 mmol) was added with stirring. The mixture was stirred at  $-78^\circ\text{C}$  for 10 min, warmed to room temperature, and stirred for 5 h. The reaction was quenched with  $\text{NH}_4\text{Cl}$  aq., extracted three times with ethyl acetate, washed with brine, dried over  $\text{Na}_2\text{SO}_4$ , and filtered. The crude product obtained after evaporation was dissolved in THF (0.4 mL) and cooled to  $0^\circ\text{C}$ . 30%  $\text{H}_2\text{O}_2$  (0.3 mL) and NaOH aq. (3.0 M, 0.3 mL) were then added dropwise to the stirred solution. After 3 h, the reaction mixture was diluted by adding water, and saturated  $\text{Na}_2\text{SO}_4$ , extracted three times with  $\text{CH}_2\text{Cl}_2$ , washed with water, dried over  $\text{MgSO}_4$ , and filtered. The solvent was removed under reduced pressure. The resultant product was subjected to esterification using pyridine (52.3 mg, 0.66 mmol) and benzoyl chloride (53 mg, 0.38 mmol) in dry  $\text{CH}_2\text{Cl}_2$  at  $0^\circ\text{C}$ . After 4 h, the reaction was quenched by water, extracted three times with  $\text{CH}_2\text{Cl}_2$ , dried over  $\text{MgSO}_4$ , and filtered. After evaporation, the crude product was purified by flash chromatography ( $\text{SiO}_2$ , ethyl acetate/hexane 0:100–4:96) to give *cis*-1-(benzoyldimethylsilyl)-2-(benzoyloxymethyl)cyclobutane (*cis*-**4**) as a colorless oil (44.3 mg, 0.0131 mmol, 66% for three steps). The diastereomeric ratio was determined by GLC analysis (*trans*/*cis* 1:>20).  $^1\text{H}$  NMR (300 MHz,  $\text{CDCl}_3$ ,

δ): 0.50 (s, 3H), 0.59 (s, 3H), 1.70–2.20 (m, 3H), 2.20–2.31 (m, 2H), 2.10 (s, 2H), 2.90–3.05 (m, 1H), 4.28–4.45 (m, 2H), 6.95–7.00 (m, 2H), 7.00–7.11 (m, 1H), 7.15–7.24 (m, 2H), 7.39–7.49 (m, 2H), 7.41–7.60 (m, 1H) 7.99–8.10 (m, 2H). <sup>13</sup>C NMR (75.4 MHz, CDCl<sub>3</sub>, δ): –4.0 (1C, SiCH<sub>3</sub>), –3.5 (1C, SiCH<sub>3</sub>), 20.3 (1C, CH<sub>2</sub>), 23.7 (1C, CH), 25.1 (1C, CH<sub>2</sub>), 25.4 (1C, CH<sub>2</sub>), 36.1 (1C, CH), 67.9 (1C, CH<sub>2</sub>O), 124.0 (1C, CH), 128.1 (2C, CH), 128.2 (2C, CH), 128.4 (2C, CH), 129.56 (1C, CH), 129.64 (1C, C), 130.4 (1C, C), 133.0 (1C, CH), 140.1 (1C, C), 166.9 (1C, C). HRMS–ESI (*m/z*): [M+Na]<sup>+</sup> calcd for C<sub>21</sub>H<sub>26</sub>NaO<sub>2</sub>S, 361.15998; found, 361.15985.

A THF solution of tetrabutylammonium fluoride (1.0 M, 0.5 mL, 0.5 mmol) was added to a solution of *cis*-**4** (22.9 mg, 0.0677 mmol) in THF (0.6 mL) with stirring at room temperature. After 30 min, methanol (0.6 mL), KHCO<sub>3</sub> (26.2 mg, 0.26 mmol), and 30% H<sub>2</sub>O<sub>2</sub> (0.25 mL) were successively added to the reaction mixture. After 30 min, the reaction mixture was diluted with water, extracted three times with CH<sub>2</sub>Cl<sub>2</sub>, washed with water, dried over MgSO<sub>4</sub>, and filtered. After evaporation, the crude product was purified by flash chromatography (SiO<sub>2</sub>, ethyl acetate/hexane 20:80–100:0) to give *cis*-1-hydroxy-2-(benzoyloxymethyl)cyclobutane (*cis*-**5**) as a colorless oil (9.7 mg, 0.047 mmol, 70%). The diastereomeric ratio was determined by <sup>1</sup>H NMR (trans/*cis* 1:>20). <sup>1</sup>H NMR (300 MHz, CDCl<sub>3</sub>, δ): 1.71–1.92 (m, 2H), 1.93–2.10 (m, 1H), 2.27–2.40 (m, 1H), 2.62 (d, *J* = 4.7 Hz, 1H), 2.78–2.90 (m, 1H), 4.34 (dd, *J* = 11.5, 5.2 Hz, 1H), 4.38–4.45 (m, 1H), 4.76 (dd, *J* = 10.7, 8.2 Hz, 1H), 7.40–7.48 (m, 2H), 7.53–7.61 (m, 1H), 8.00–8.08 (m, 2H). <sup>13</sup>C NMR (75.4 MHz, CDCl<sub>3</sub>, δ): 17.6 (1C, CH<sub>2</sub>), 29.8 (1C, CH<sub>2</sub>), 40.5 (1C, CH), 64.0 (1C, CH<sub>2</sub>), 67.8 (1C, CH), 127.6 (1C, CH), 128.5 (2C, CH), 129.7 (2C, C), 133.1 (1C, CH), 167.0 (1C, C). HRMS–ESI (*m/z*): [M+Na]<sup>+</sup> calcd for C<sub>12</sub>H<sub>14</sub>NaO<sub>3</sub>, 229.0835; found, 229.0836.

### Stereoselective synthesis of *trans*-1-hydroxy-2-benzoyloxycyclobutane (*trans*-**7**).

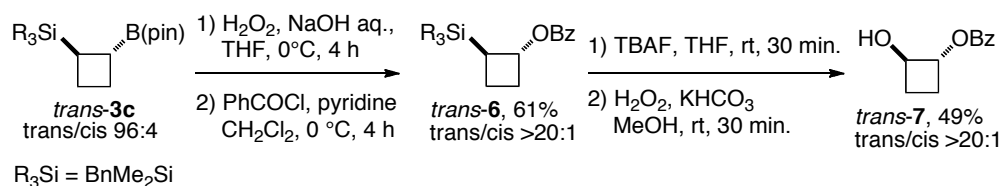

Into a THF (1.2 mL) solution of *trans*-**3c** (160.2 mg, 0.5 mmol), H<sub>2</sub>O<sub>2</sub> (30%, 1.0 mL) and aqueous NaOH (3.0 M, 1.0 mL) were added at 0°C with stirring. After 4 h, the reaction mixture was diluted by water and two drops of saturated Na<sub>2</sub>S<sub>2</sub>O<sub>3</sub>, extracted with CH<sub>2</sub>Cl<sub>2</sub> three times. The combined organic layer was washed with water and dried over MgSO<sub>4</sub>, filtered and evaporated. The crude mixture was treated by pyridine (117 mg, 1.8 mmol) and benzoyl chloride (141 mg, 1.0 mmol) in CH<sub>2</sub>Cl<sub>2</sub> (4.0 mL) at 0°C. After stirred for 4 h, the reaction mixture was quenched by water, extracted with CH<sub>2</sub>Cl<sub>2</sub> three

times. The combined organic layer was washed with water and dried over  $\text{MgSO}_4$ , filtered and evaporated. The isomeric ratio of *trans*-**6** (trans/cis >20:1) determined by  $^1\text{H}$  NMR before purification. The crude product was purified by flash chromatography ( $\text{SiO}_2$ , ethyl acetate/hexane 20:80–100:0) to give *trans*-**6** (96 mg, 0.36 mmol, 61%) as a colorless oil.

A THF solution of tetrabutylammonium fluoride (1.0 M, 2.8 mL, 2.8 mmol) was added to a solution of *trans*-**6** (350.4 mg, 1.08 mmol) in THF (2.8 mL) with stirring at room temperature. After 30 min, methanol (2.5 mL),  $\text{KHCO}_3$  (142 mg, 0.26 mmol), and 30%  $\text{H}_2\text{O}_2$  (1.5 mL) were successively added to the reaction mixture. After 30 min, the reaction mixture was diluted with water, extracted three times with  $\text{CH}_2\text{Cl}_2$ , washed with water and 1% aqueous  $\text{Na}_2\text{S}_2\text{O}_3$ , dried over  $\text{MgSO}_4$ , filtered and evaporated. The yield (49%) and isomeric ratio (trans/cis >20:1) of *trans*-**7** determined by  $^1\text{H}$  NMR before purification. The crude product was purified by flash chromatography ( $\text{SiO}_2$ , ethyl acetate/hexane 2:98–12:88) and further purification was carried out with gel permeation chromatography to give *trans*-**7** as a colorless oil.  $^1\text{H}$  NMR (300 MHz,  $\text{CDCl}_3$ ,  $\delta$ ): 1.55–1.82 (m, 2H), 2.18–2.31 (m, 2H), 4.18–4.27 (m, 1H), 4.73–4.82 (m, 1H), 7.43–7.50 (m, 2H), 7.56–7.62 (m, 1H), 8.03–8.10 (m, 2H).  $^{13}\text{C}$  NMR (75.4 MHz,  $\text{CDCl}_3$ ,  $\delta$ ): 19.0 (1C,  $\text{CH}_2$ ), 22.0 (1C,  $\text{CH}_2$ ), 72.7 (1C, CH), 77.2 (1C, CH), 128.5 (2C, CH), 129.7 (1C, C), 129.8 (2C, CH), 133.4 (1C, CH), 167.6 (1C, C). IR (neat,  $\text{cm}^{-1}$ ): 3418 (br), 3064 (w), 2956 (w), 1715 (s), 1700 (s), 1270 (s), 708 (s). HRMS–ESI ( $m/z$ ):  $[\text{M}+\text{Na}]^+$  calcd for  $\text{C}_{11}\text{H}_{12}\text{NaO}_3$ , 215.0679; found, 215.0682.

### Stereoselective synthesis of *cis*-1-hydroxy-2-benzoyloxycyclobutane (*cis*-**7**).

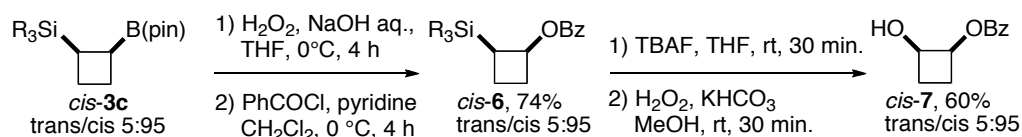

Into a THF (1.2 mL) solution of *cis*-**3c** (161.3 mg, 0.5 mmol),  $\text{H}_2\text{O}_2$  (30%, 1.0 mL) and aqueous  $\text{NaOH}$  (3.0 M, 1.0 mL) were added at  $0^\circ\text{C}$  with stirring. After 4 h, the reaction mixture was diluted by water and two drops of saturated  $\text{Na}_2\text{S}_2\text{O}_3$ , extracted with  $\text{CH}_2\text{Cl}_2$  three times. The combined organic layer was washed with water and dried over  $\text{MgSO}_4$ , filtered and evaporated. The crude mixture was treated by pyridine (53 mg, 1.5 mmol) and benzoyl chloride (141 mg, 1.0 mmol) in  $\text{CH}_2\text{Cl}_2$  (4.0 mL) at  $0^\circ\text{C}$ . After stirred for 4 h, the reaction mixture was quenched by water, extracted with  $\text{CH}_2\text{Cl}_2$  three times. The combined organic layer was washed with water and dried over  $\text{MgSO}_4$ , filtered and evaporated. The isomeric ratio of the crude product (trans/cis 5:95) was determined by  $^1\text{H}$  NMR before

purification. The crude product was purified by flash chromatography (SiO<sub>2</sub>, ethyl acetate/hexane 20:80–100:0) to give *cis*-**6** (117 mg, 0.36 mmol, 74%) as a colorless oil.

A THF solution of tetrabutylammonium fluoride (1.0 M, 2.8 mL, 2.8 mmol) was added to a solution of *cis*-**6** (117 mg, 0.36 mmol) in THF (2.8 mL) with stirring at room temperature. After 30 min, methanol (2.5 mL), KHCO<sub>3</sub> (142 mg, 0.26 mmol), and 30% H<sub>2</sub>O<sub>2</sub> (1.5 mL) were successively added to the reaction mixture. After 30 min, the reaction mixture was diluted with water, extracted three times with CH<sub>2</sub>Cl<sub>2</sub>, washed with water and 1% aqueous Na<sub>2</sub>S<sub>2</sub>O<sub>3</sub>, dried over MgSO<sub>4</sub>, filtered and evaporated. The yield (60%) and isomeric ratio (trans/cis 5:95) of *cis*-**7** determined by <sup>1</sup>H NMR before purification. The crude product was purified by flash chromatography (SiO<sub>2</sub>, ethyl acetate/hexane 2:98–12:88) and further purification was carried out with gel permeation chromatography to give *cis*-**7** as a colorless oil. <sup>1</sup>H NMR (300 MHz, CDCl<sub>3</sub>, δ): 2.00–2.28 (m, 5H), 4.51–4.64 (m, 1H), 5.20–5.30 (m, 1H), 7.44–7.48 (m, 2H), 7.56–7.62 (m, 1H), 8.06–8.11 (m, 2H). <sup>13</sup>C NMR (75.4 MHz, CDCl<sub>3</sub>, δ): 23.4 (1C, CH<sub>2</sub>), 27.9 (1C, CH<sub>2</sub>), 69.0 (1C, CH), 73.5 (1C, CH), 128.5 (2C, CH), 129.8 (2C, CH), 129.9 (1C, C), 133.3 (1C, CH), 166.8 (1C, C). IR (neat, cm<sup>-1</sup>): 3445 (br), 3064 (w), 2951 (w), 1716 (s), 1700 (s), 1272 (s), 711 (s). HRMS–ESI (*m/z*): [M+Na]<sup>+</sup> calcd for C<sub>11</sub>H<sub>12</sub>NaO<sub>3</sub>, 215.0679; found, 215.0683.

### Stereoselective synthesis of *trans*-*N*-benzyl-2-phenylcyclobutanamine (*trans*-**8**).<sup>6</sup>

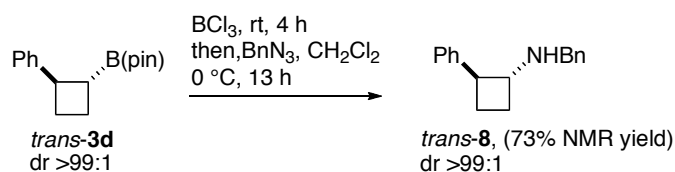

The cyclobutylboronate (*trans*-**3d**, 51 mg, 0.20 mmol, trans/cis >99:1) was placed in a reaction tube and the tube was sealed with a screw cap containing Teflon coated rubber septum. The reaction tube was connected to an argon line through a needle, evacuated and backfilled with argon. A dichloromethane solution of BCl<sub>3</sub> (1.0 M, 1.0 mL, 1.0 mmol) was added to the reaction tube with stirring at room temperature. After 4 h, the volatile materials were removed in vacuo, and dry dichloromethane (1.2 mL) was added to the resultant product. The reaction tube was cooled to 0 °C, and benzylazide (80.0 mg, 0.60 mmol) was added to the mixture. After stirred for 13 h at 0 °C, the reaction mixture was quenched by adding aqueous NaOH, extracted three times with diethyl ether, washed with water, dried over MgSO<sub>4</sub>, and filtered. The solvents were removed under reduced pressure to give the crude product. The NMR yield of *trans*-**8** was determined by using mesitylene as the internal standard (73%). The diastereoselectivity was determined by GLC analysis (trans/cis >99:1). Further purification

was carried out by flash chromatography to give *trans*-*N*-benzyl-2-phenylcyclobutanamine (*trans*-**8**) in 44% as a colorless oil. <sup>1</sup>H NMR (300 MHz, CDCl<sub>3</sub>, δ): 1.60–1.80 (m, 2H), 2.05–2.30 (m, 2H), 3.18 (dd, *J* = 16.8, 7.9 Hz, 1H), 3.38 (dd, *J* = 15.9, 7.7 Hz, 1H), 3.63–3.78 (m, 2H), 7.15–7.40 (m, 10H). <sup>13</sup>C NMR (75.4 MHz, CDCl<sub>3</sub>, δ): 22.3 (1C, CH<sub>2</sub>), 27.2 (1C, CH<sub>2</sub>), 50.1 (1C, CH), 50.9 (1C, CH<sub>2</sub>), 60.7 (1C, CH), 126.2 (1C, CH), 126.88 (2C, CH), 126.90 (1C, CH), 128.2 (2C, CH), 128.36 (2C, CH), 128.38 (2C, CH), 140.4 (1C, C), 144.2 (1C, C). HRMS–EI (*m/z*): [M+H]<sup>+</sup> calcd for C<sub>17</sub>H<sub>20</sub>N, 238.1597; found, 238.1597.

### Stereoselective synthesis of *cis*-*N*-benzyl-2-phenylcyclobutanamine (*cis*-**8**).<sup>6</sup>

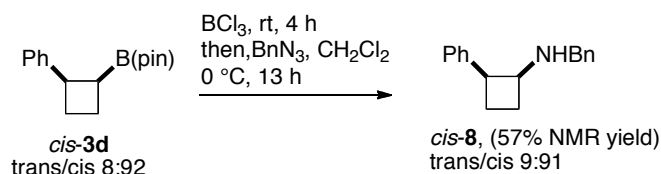

The cyclobutylboronate (*cis*-**3d**, 52.2 mg, 0.20 mmol, trans/cis 8:92) was placed in a reaction tube and the tube was sealed with a screw cap containing Teflon coated rubber septum. The reaction tube was connected to an argon line through a needle, evacuated and backfilled with argon. A dichloromethane solution of BCl<sub>3</sub> (1.0 M, 1.0 mL, 1.0 mmol) was added to the reaction tube with stirring at room temperature. After 4 h, the volatile materials were removed in vacuo, and dry dichloromethane (1.2 mL) was added to the resultant product. The reaction tube was cooled to 0 °C, and benzylazide (82.2 mg, 0.60 mmol) was added to the mixture. After stirred for 13 h at 0 °C, the reaction mixture was quenched by adding aqueous NaOH, extracted three times with diethyl ether, washed with water, dried over MgSO<sub>4</sub>, and filtered. The solvents were removed under reduced pressure to give the crude product. The NMR yield of *cis*-**8** (57%) was determined by using mesitylene as the internal standard. The diastereoselectivity was determined by GLC analysis (trans/cis 9:91). Further purification was carried out by flash chromatography to give *cis*-*N*-benzyl-2-phenylcyclobutanamine (*cis*-**8**) in 46% as a colorless oil. <sup>1</sup>H NMR (300 MHz, CDCl<sub>3</sub>, δ): 1.93–2.02 (m, 1H), 2.05–2.15 (m, 1H), 2.18–2.28 (m, 1H), 2.32–2.43 (m, 1H), 3.44 (s, 2H), 3.68 (q, *J* = 7.6 Hz, 1H), 3.79–3.87 (m, 1H), 6.95–7.00 (m, 2H), 7.14–7.29 (m, 4H), 7.32–7.38 (m, 4H). <sup>13</sup>C NMR (75.4 MHz, CDCl<sub>3</sub>, δ): 21.5 (1C, CH<sub>2</sub>), 29.0 (1C, CH<sub>2</sub>), 46.0 (1C, CH), 50.8 (1C, CH<sub>2</sub>), 55.8 (1C, CH), 126.4 (1C, CH), 126.9 (1C, CH), 128.27 (2C, CH), 128.29 (2C, CH), 128.49 (2C, CH), 128.54 (2C, CH), 140.1 (1C, C), 140.6 (1C, C). IR (neat, cm<sup>-1</sup>): 3027 (w), 2941 (m), 1494 (m), 1454 (w), 1142 (m), 699 (s). HRMS–EI (*m/z*): [M+H]<sup>+</sup> calcd for C<sub>17</sub>H<sub>20</sub>N, 238.1596; found, 238.1599.



## References

- (1) Miura, K.; Okajima, S.; Hondo, T.; Nakagawa, T.; Takahashi, T.; Hosomi, A. *J. Am. Chem. Soc.* **2000**, *122*, 11348–11357.
- (2) Denmark, S. E.; Collins, W. R. *Org. Lett.* **2007**, *9*, 3801–3804.
- (3) Crousse, B.; Alami, M.; Linstrumelle, G. *Synlett* **1997**, 992–994.
- (4) Wrackmeyer, B. *Prog. Nucl. Magn. Reson. Spectrosc.* **1979**, *12*, 227–259.
- (5) Pelz, N. F.; Woodward, A. R.; Burks, H. E.; Sieber, J. D.; Morken, J. P. *J. Am. Chem. Soc.* **2004**, *126*, 16328–16329.
- (6) Hupe, E.; Marek, I.; Knochel, P. *Org. Lett.* **2002**, *4*, 2861–2863.
- (7) Nemoto, H.; Miyata, J.; Hawamata, H.; Nagamochi, M.; Fukumoto, K. *Tetrahedron* **1995**, *51*, 5511–5522.

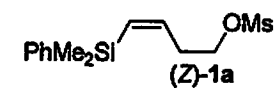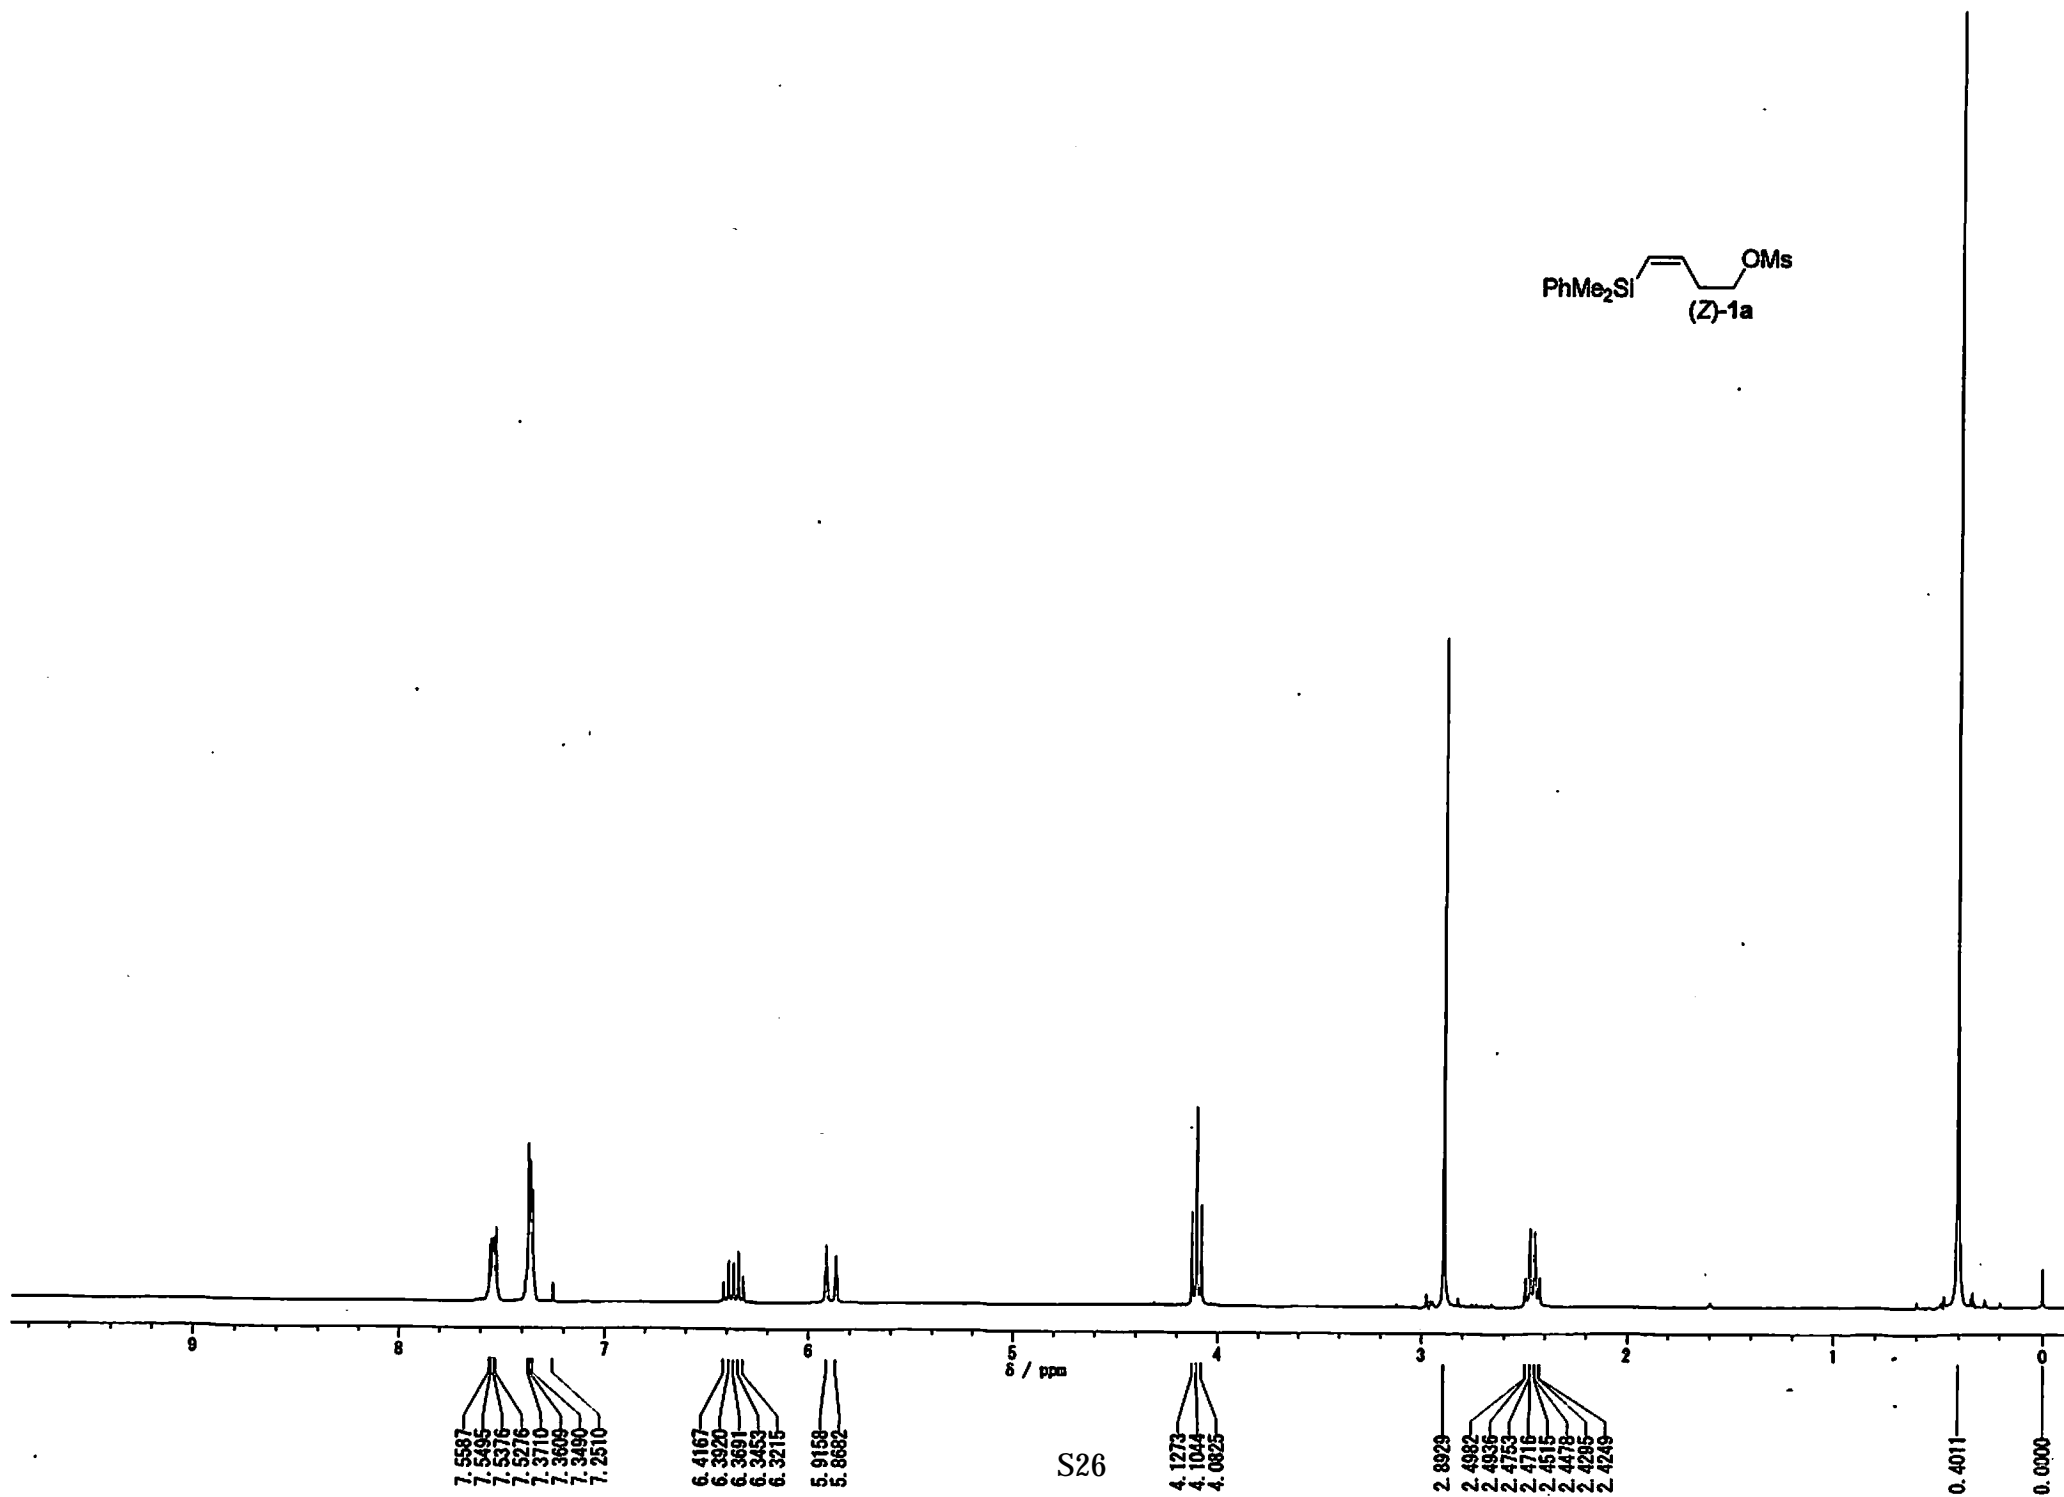

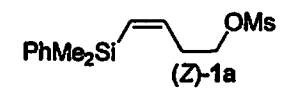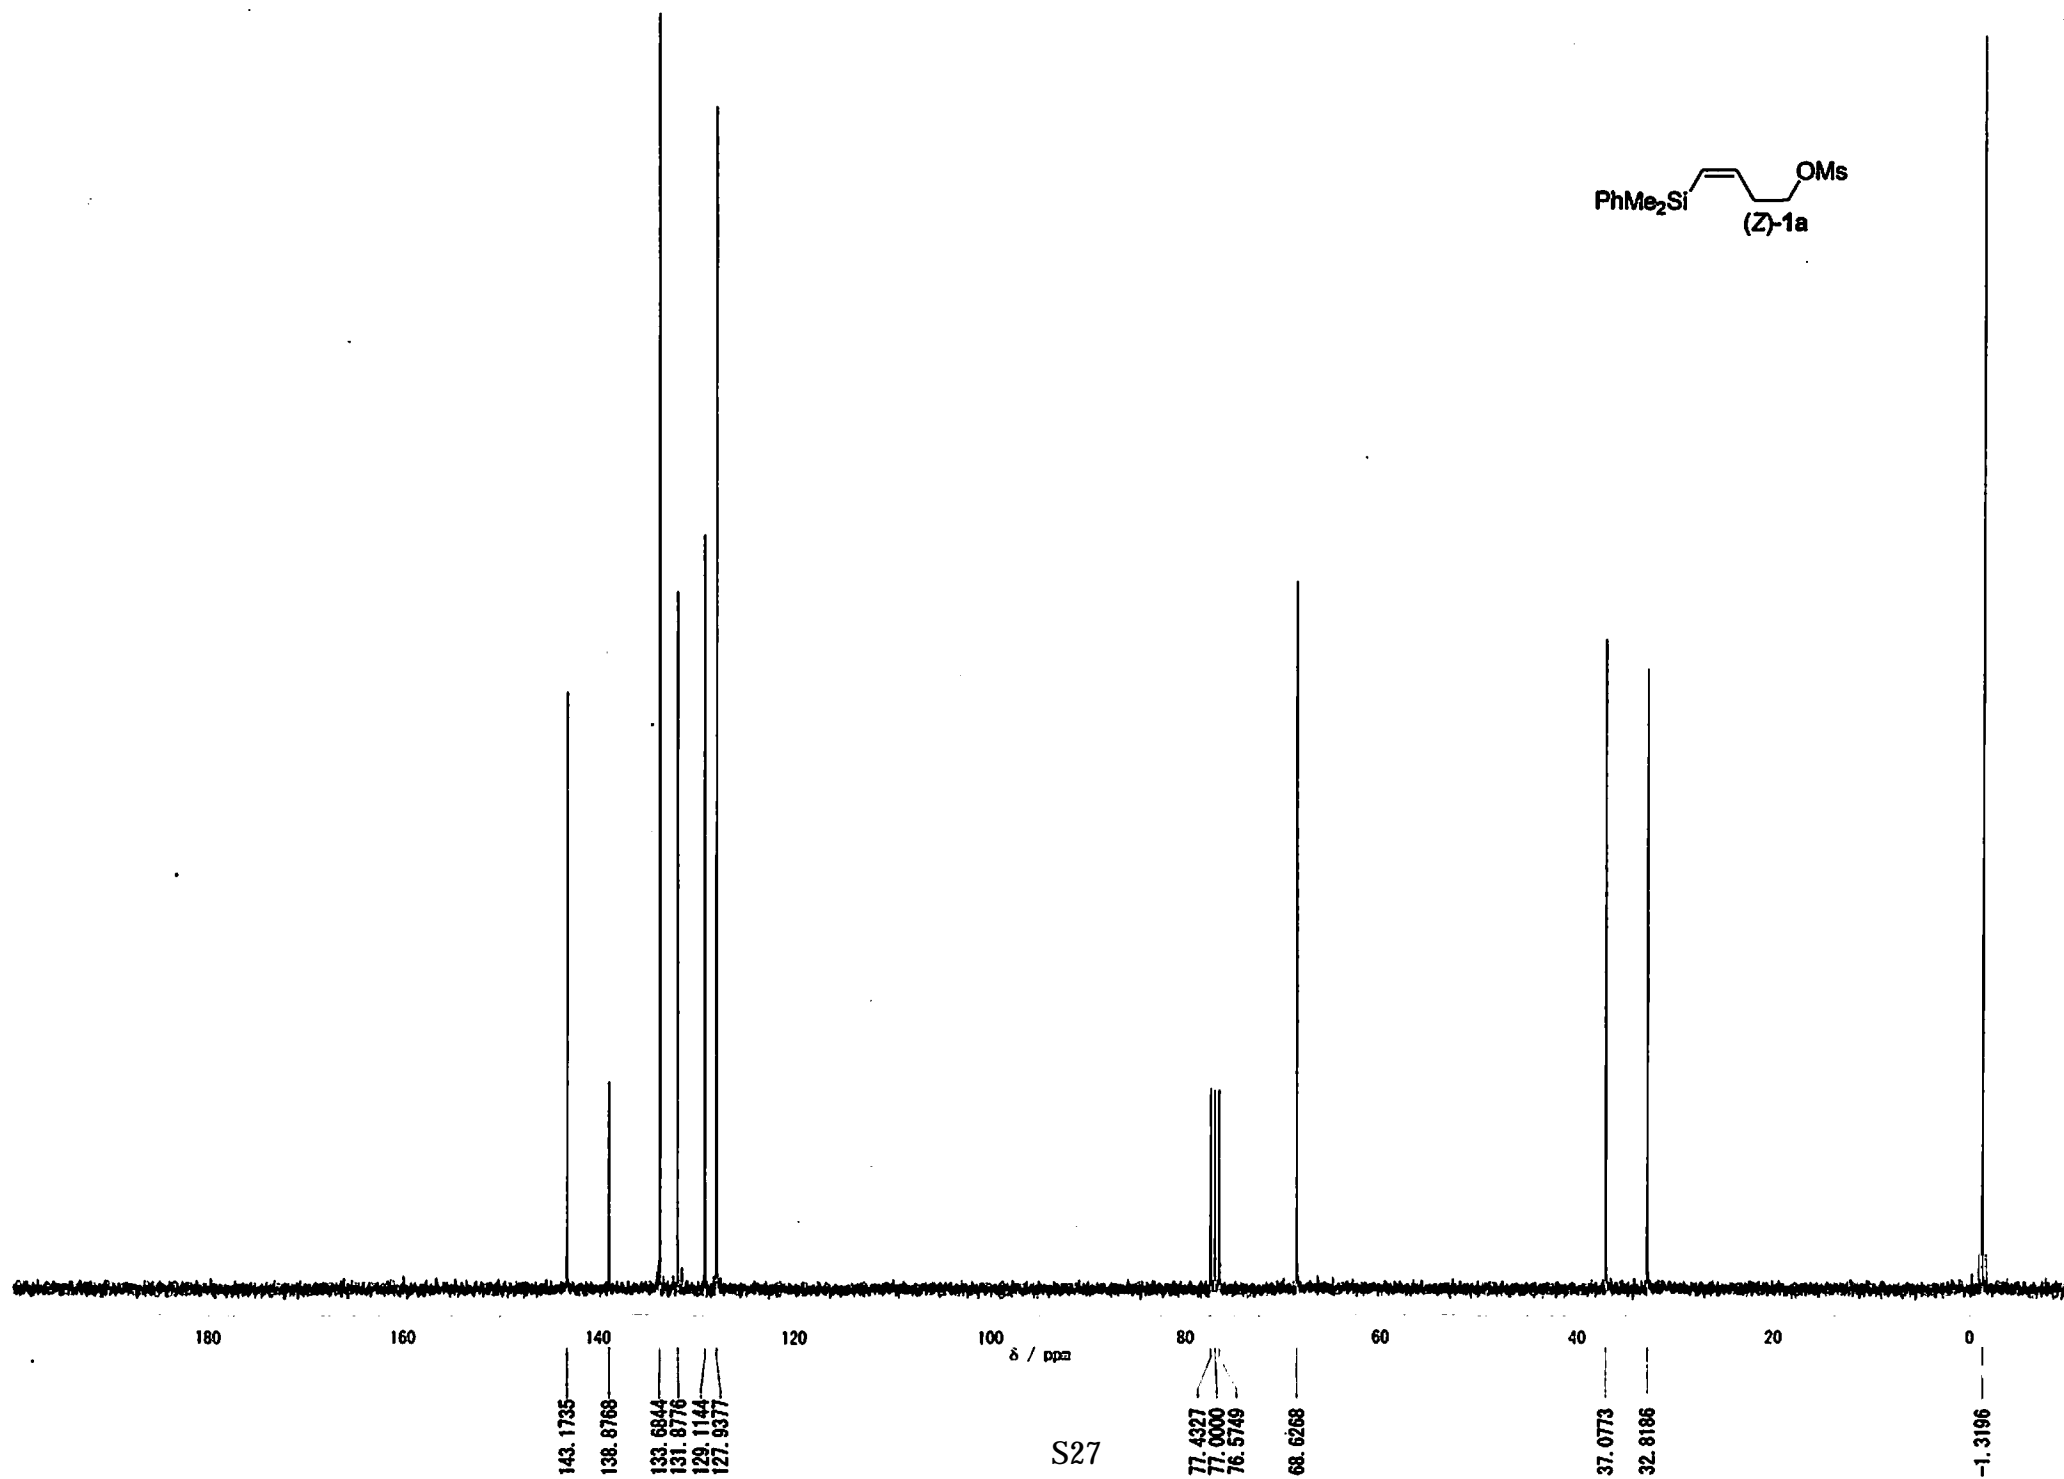

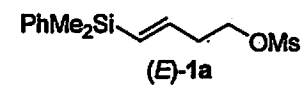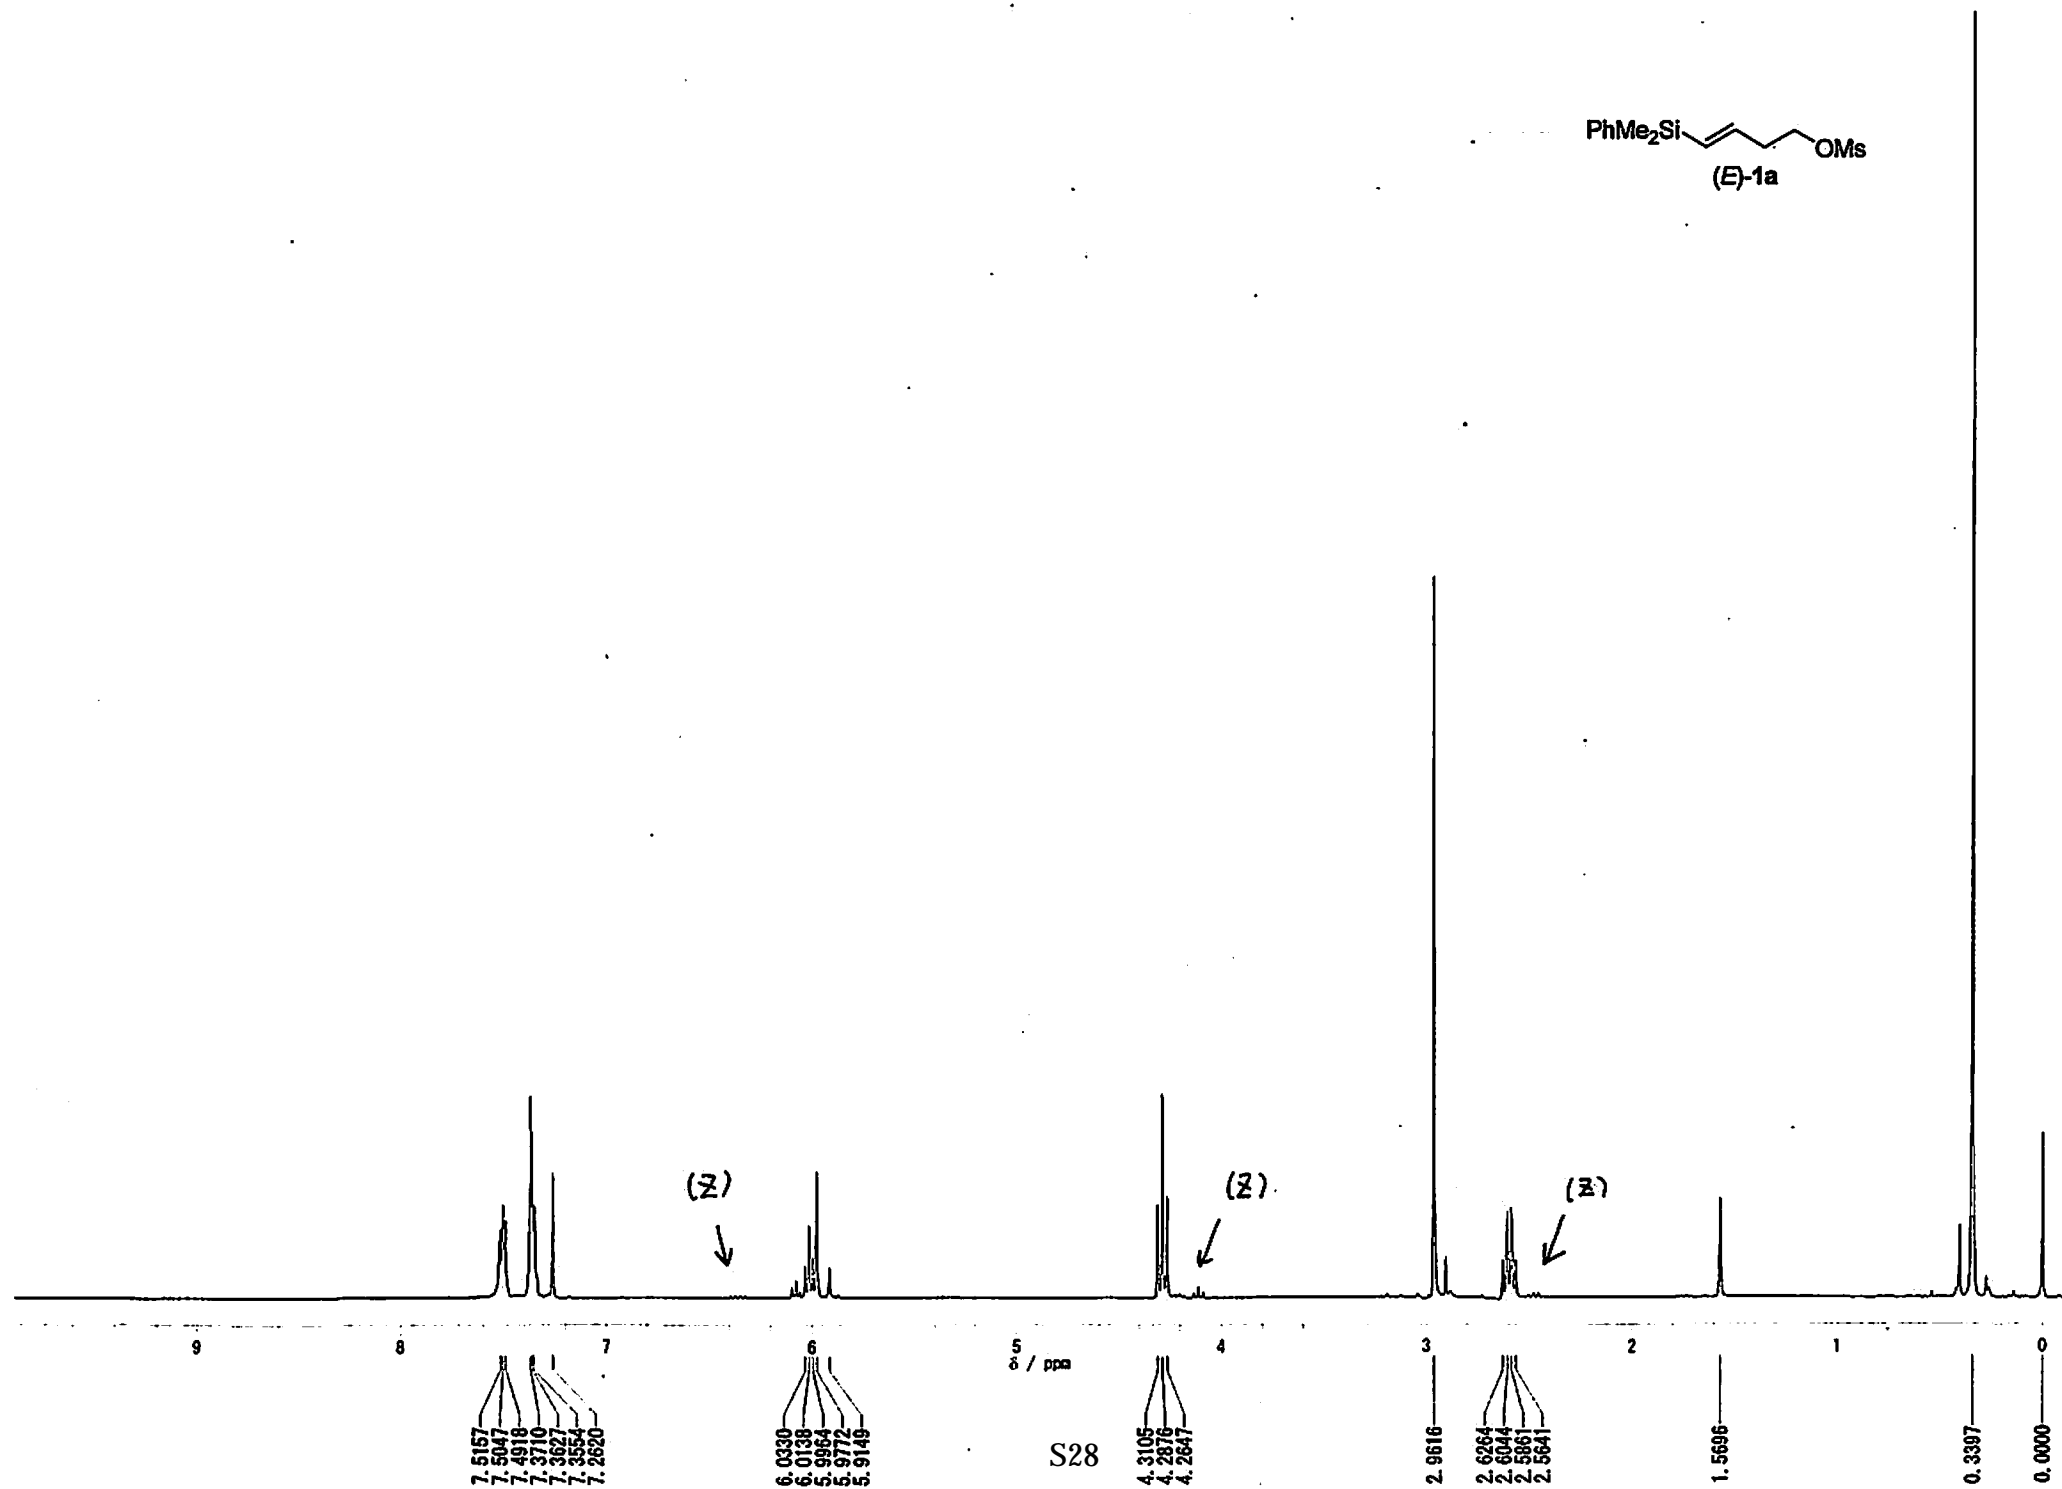

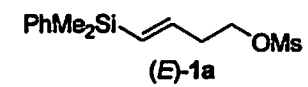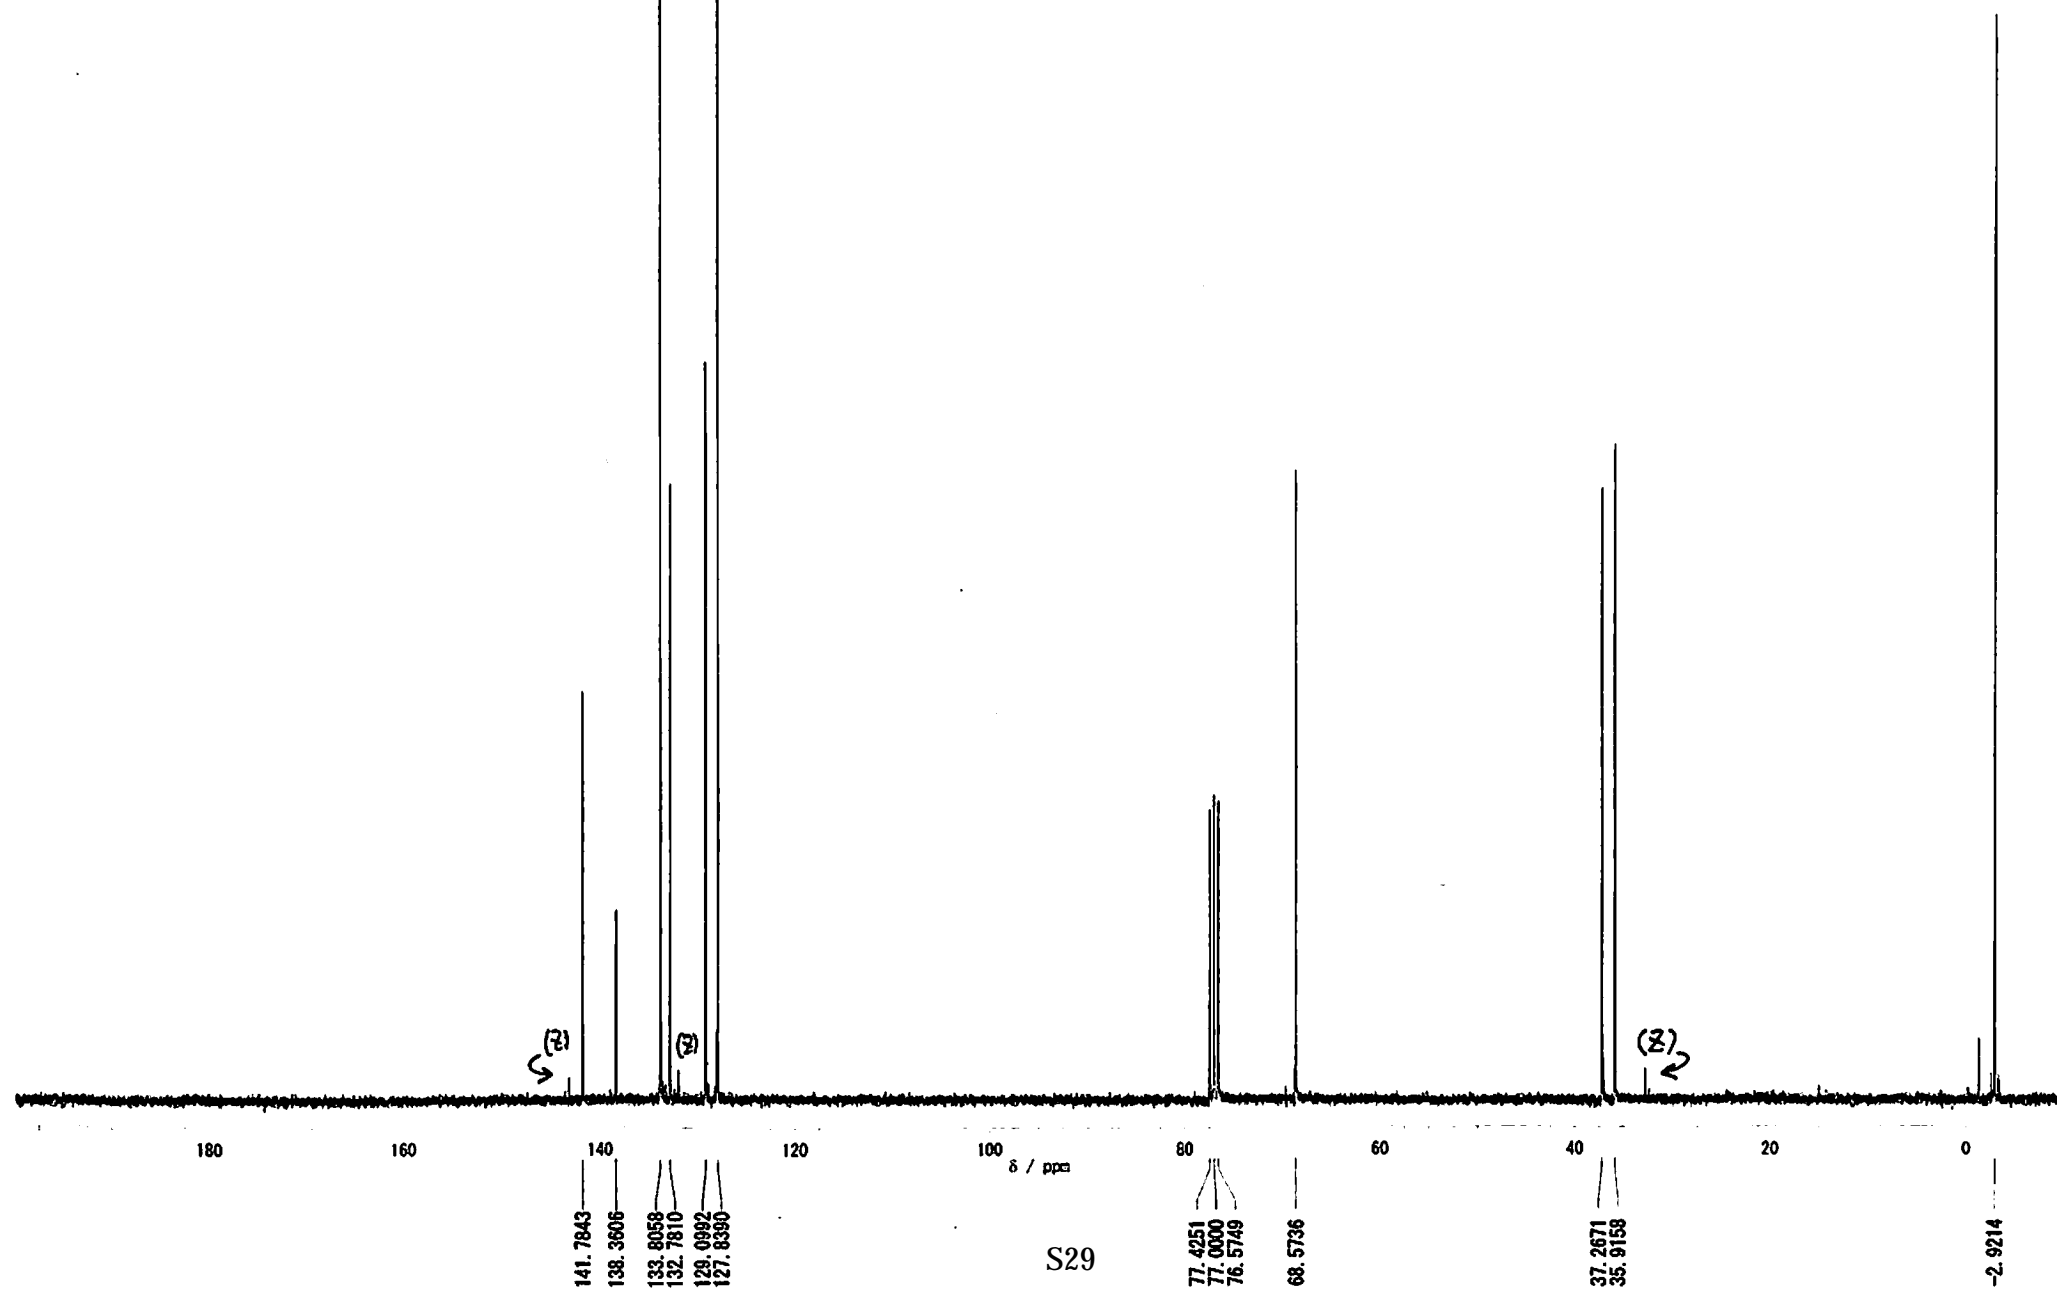

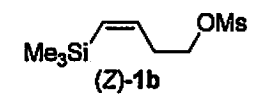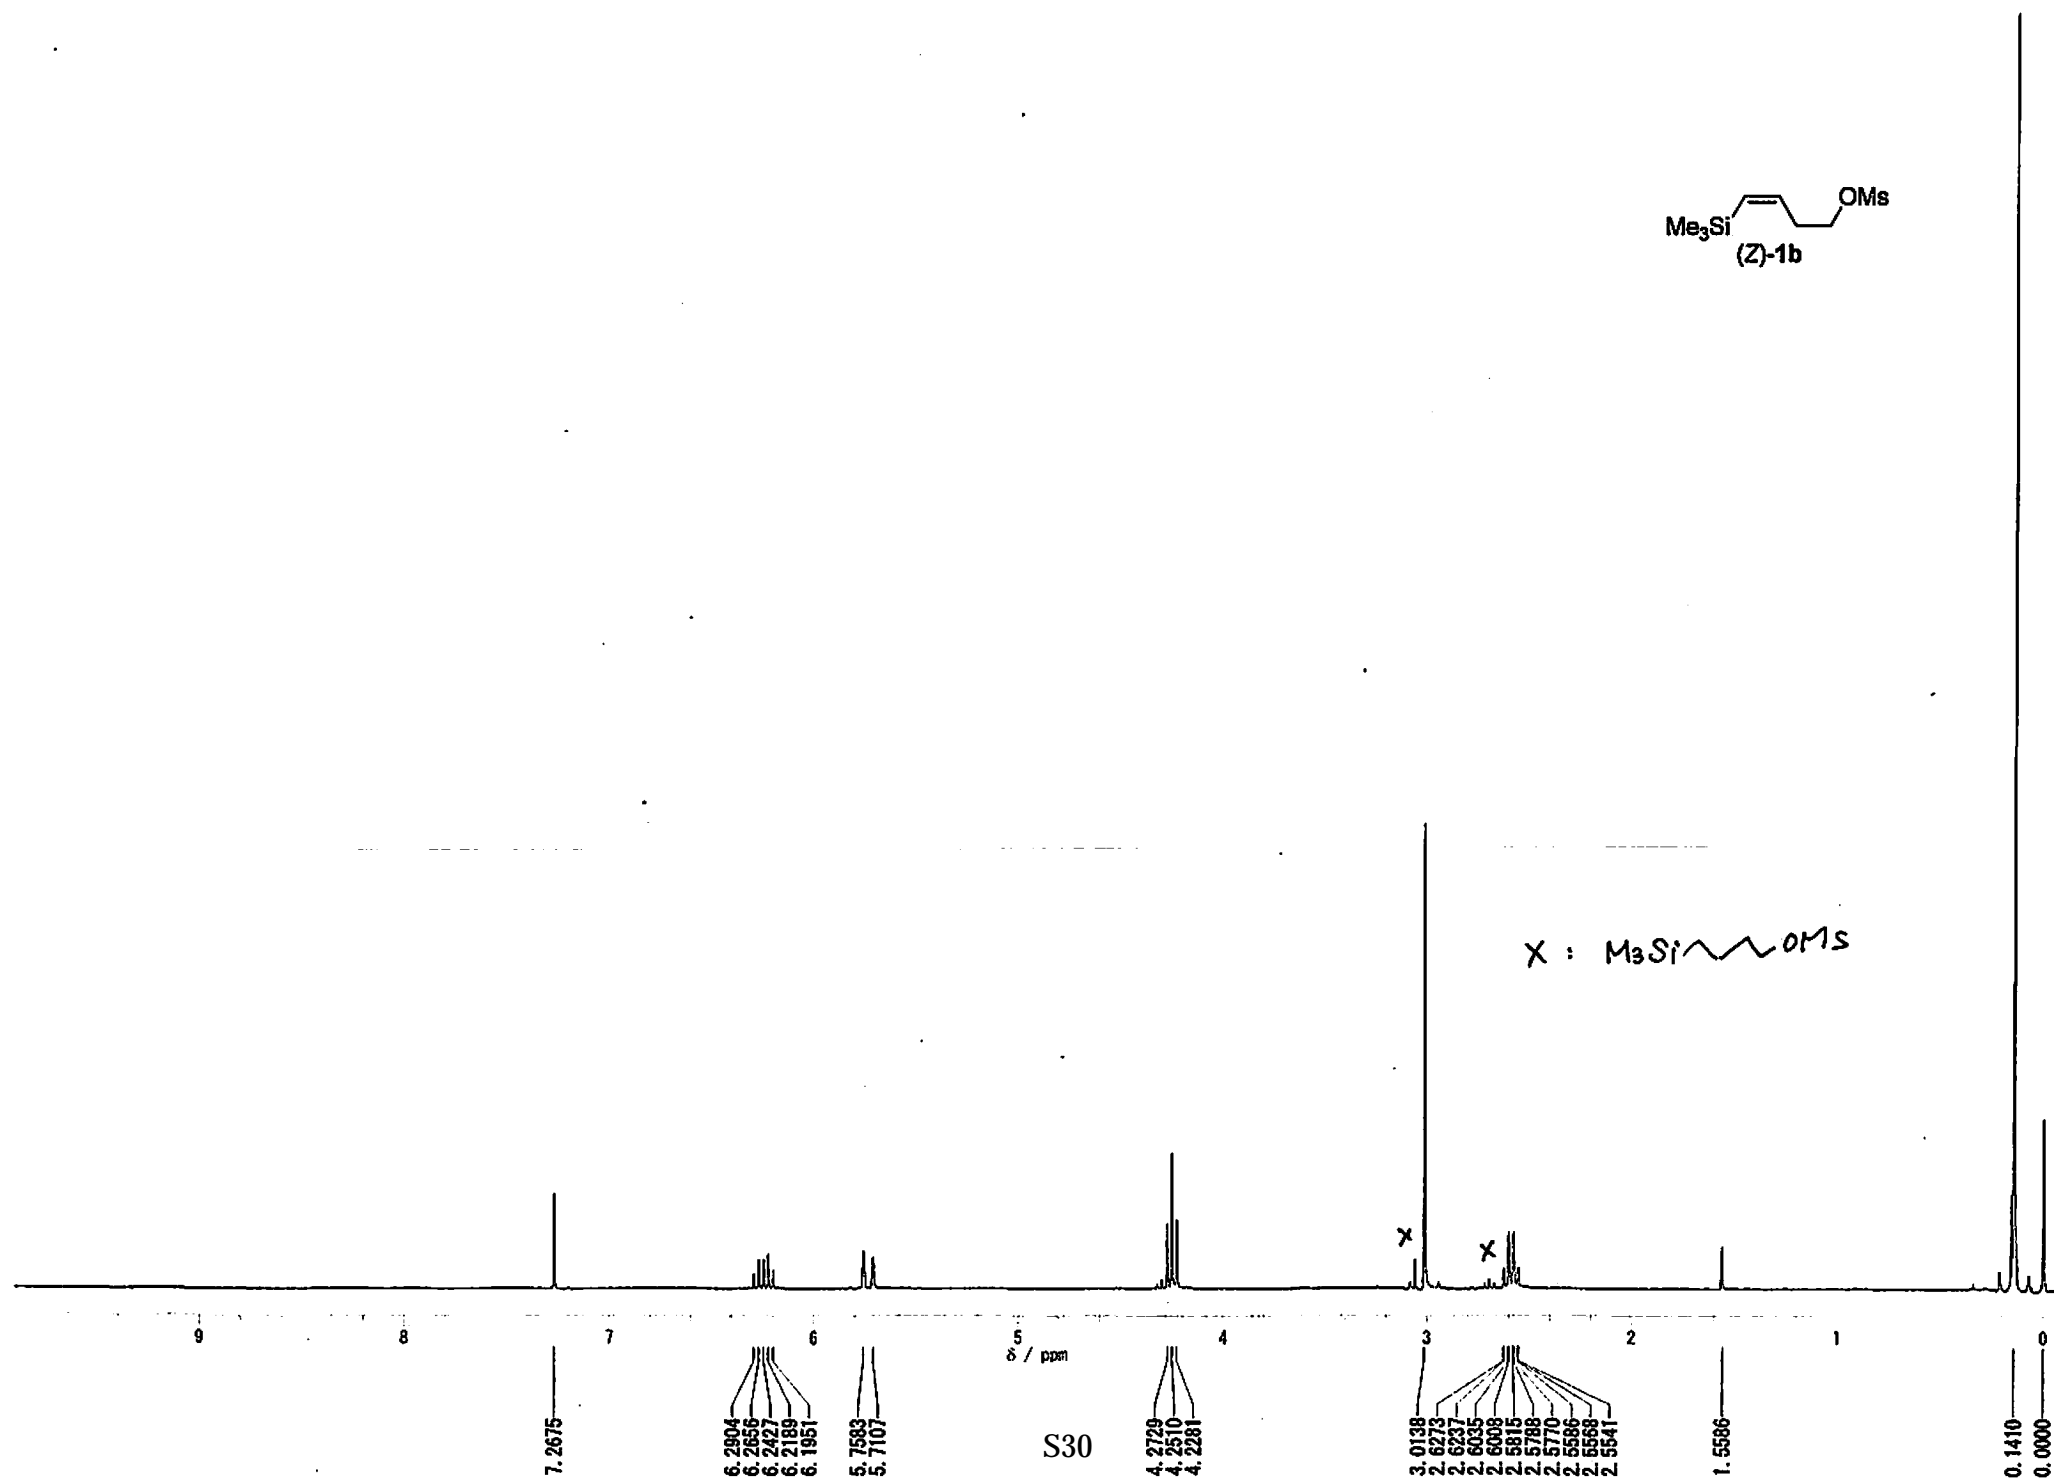

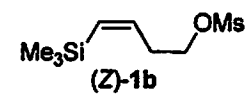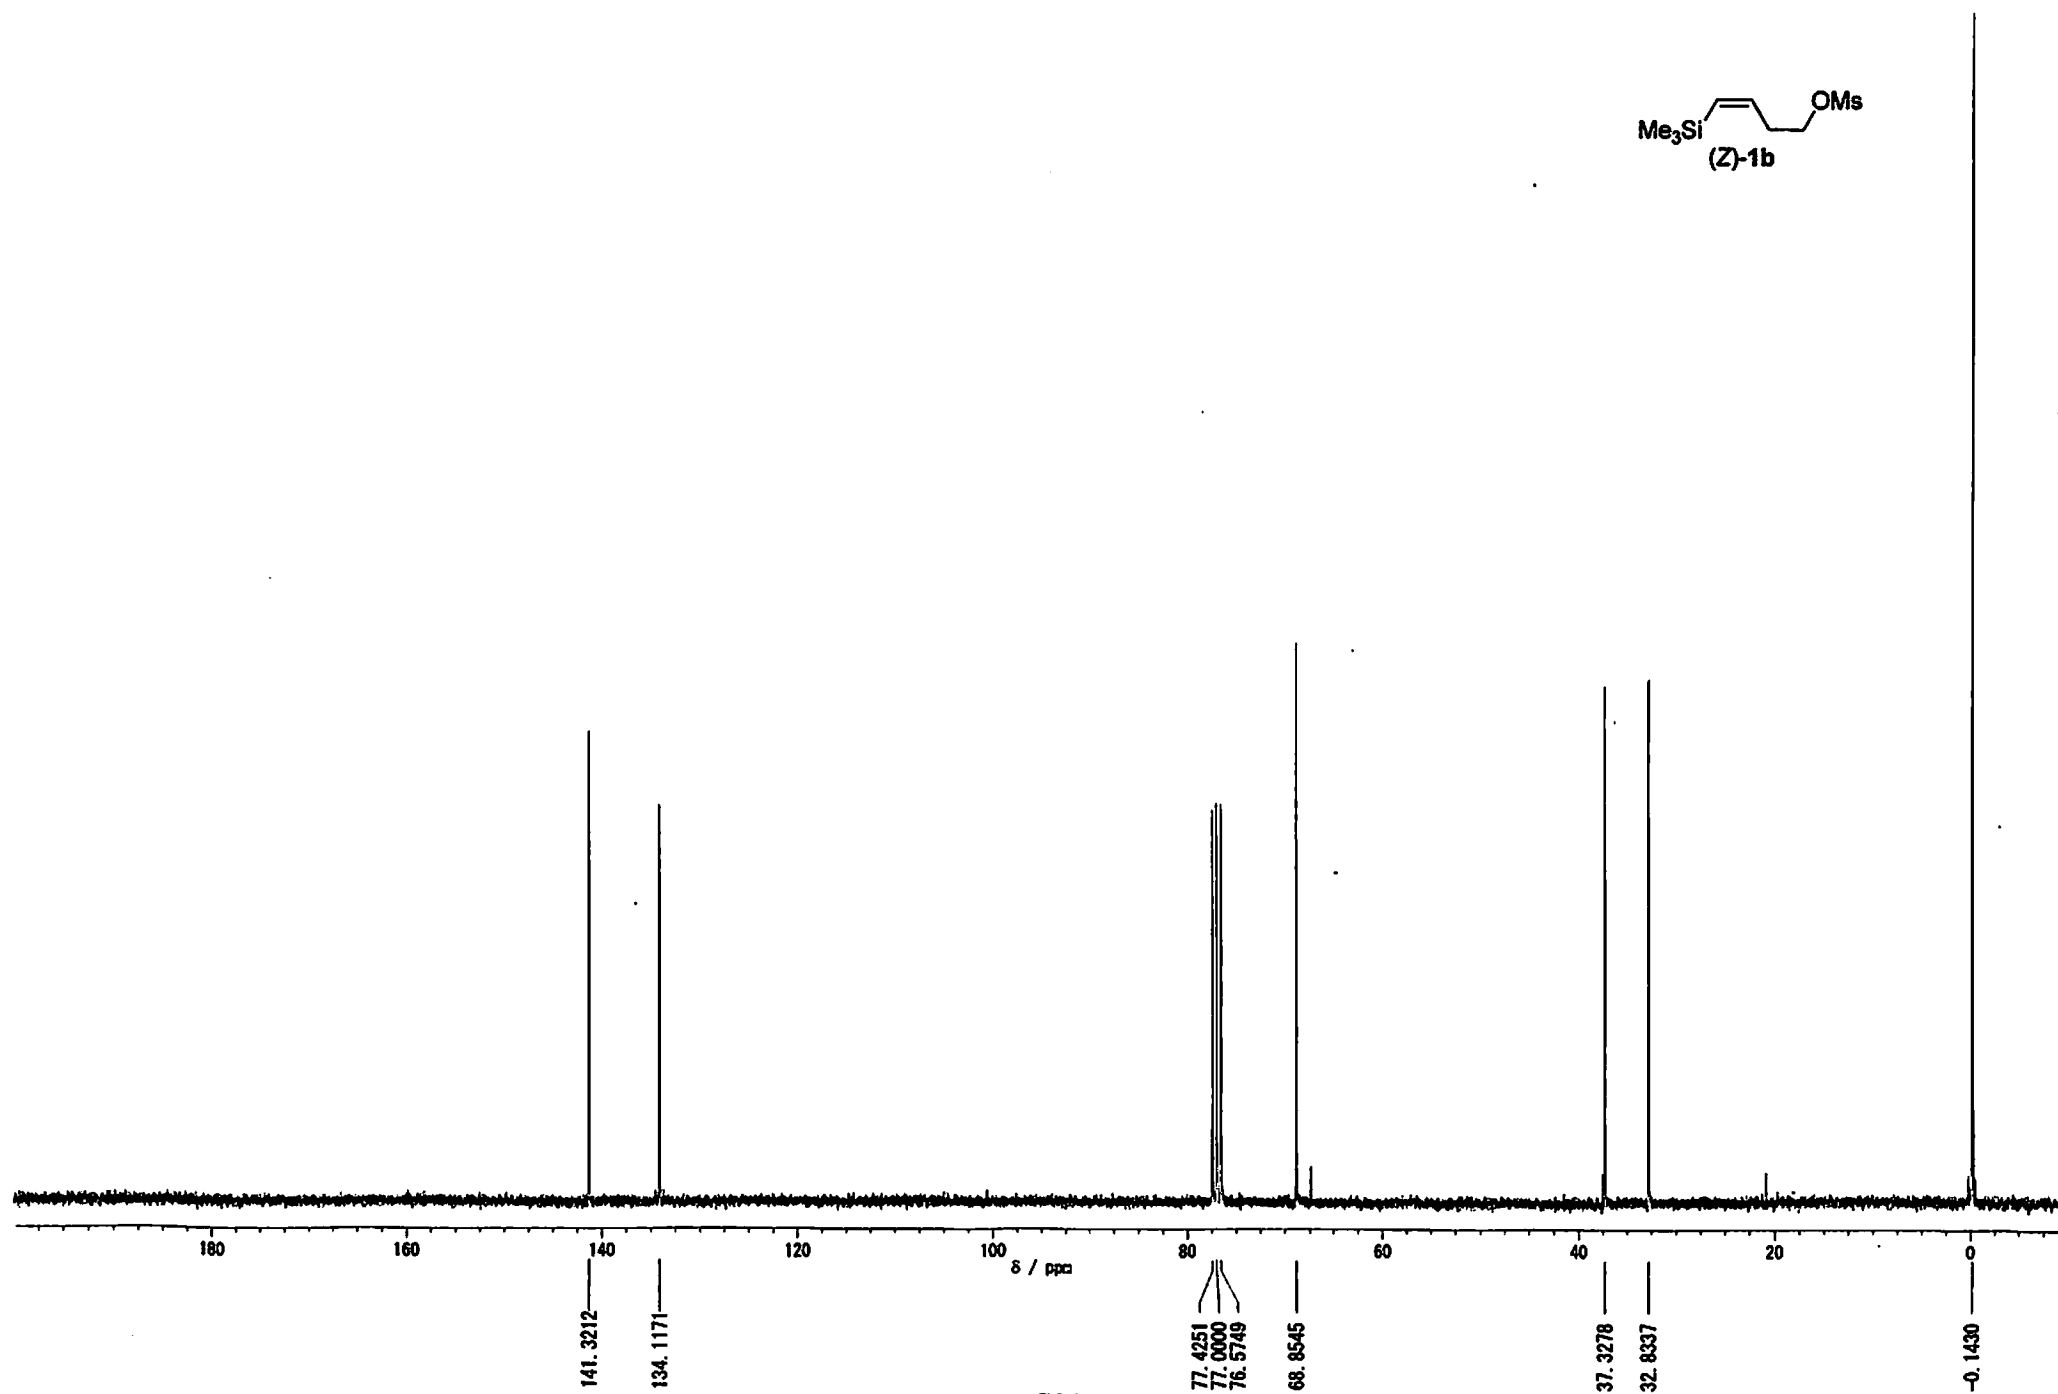

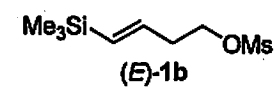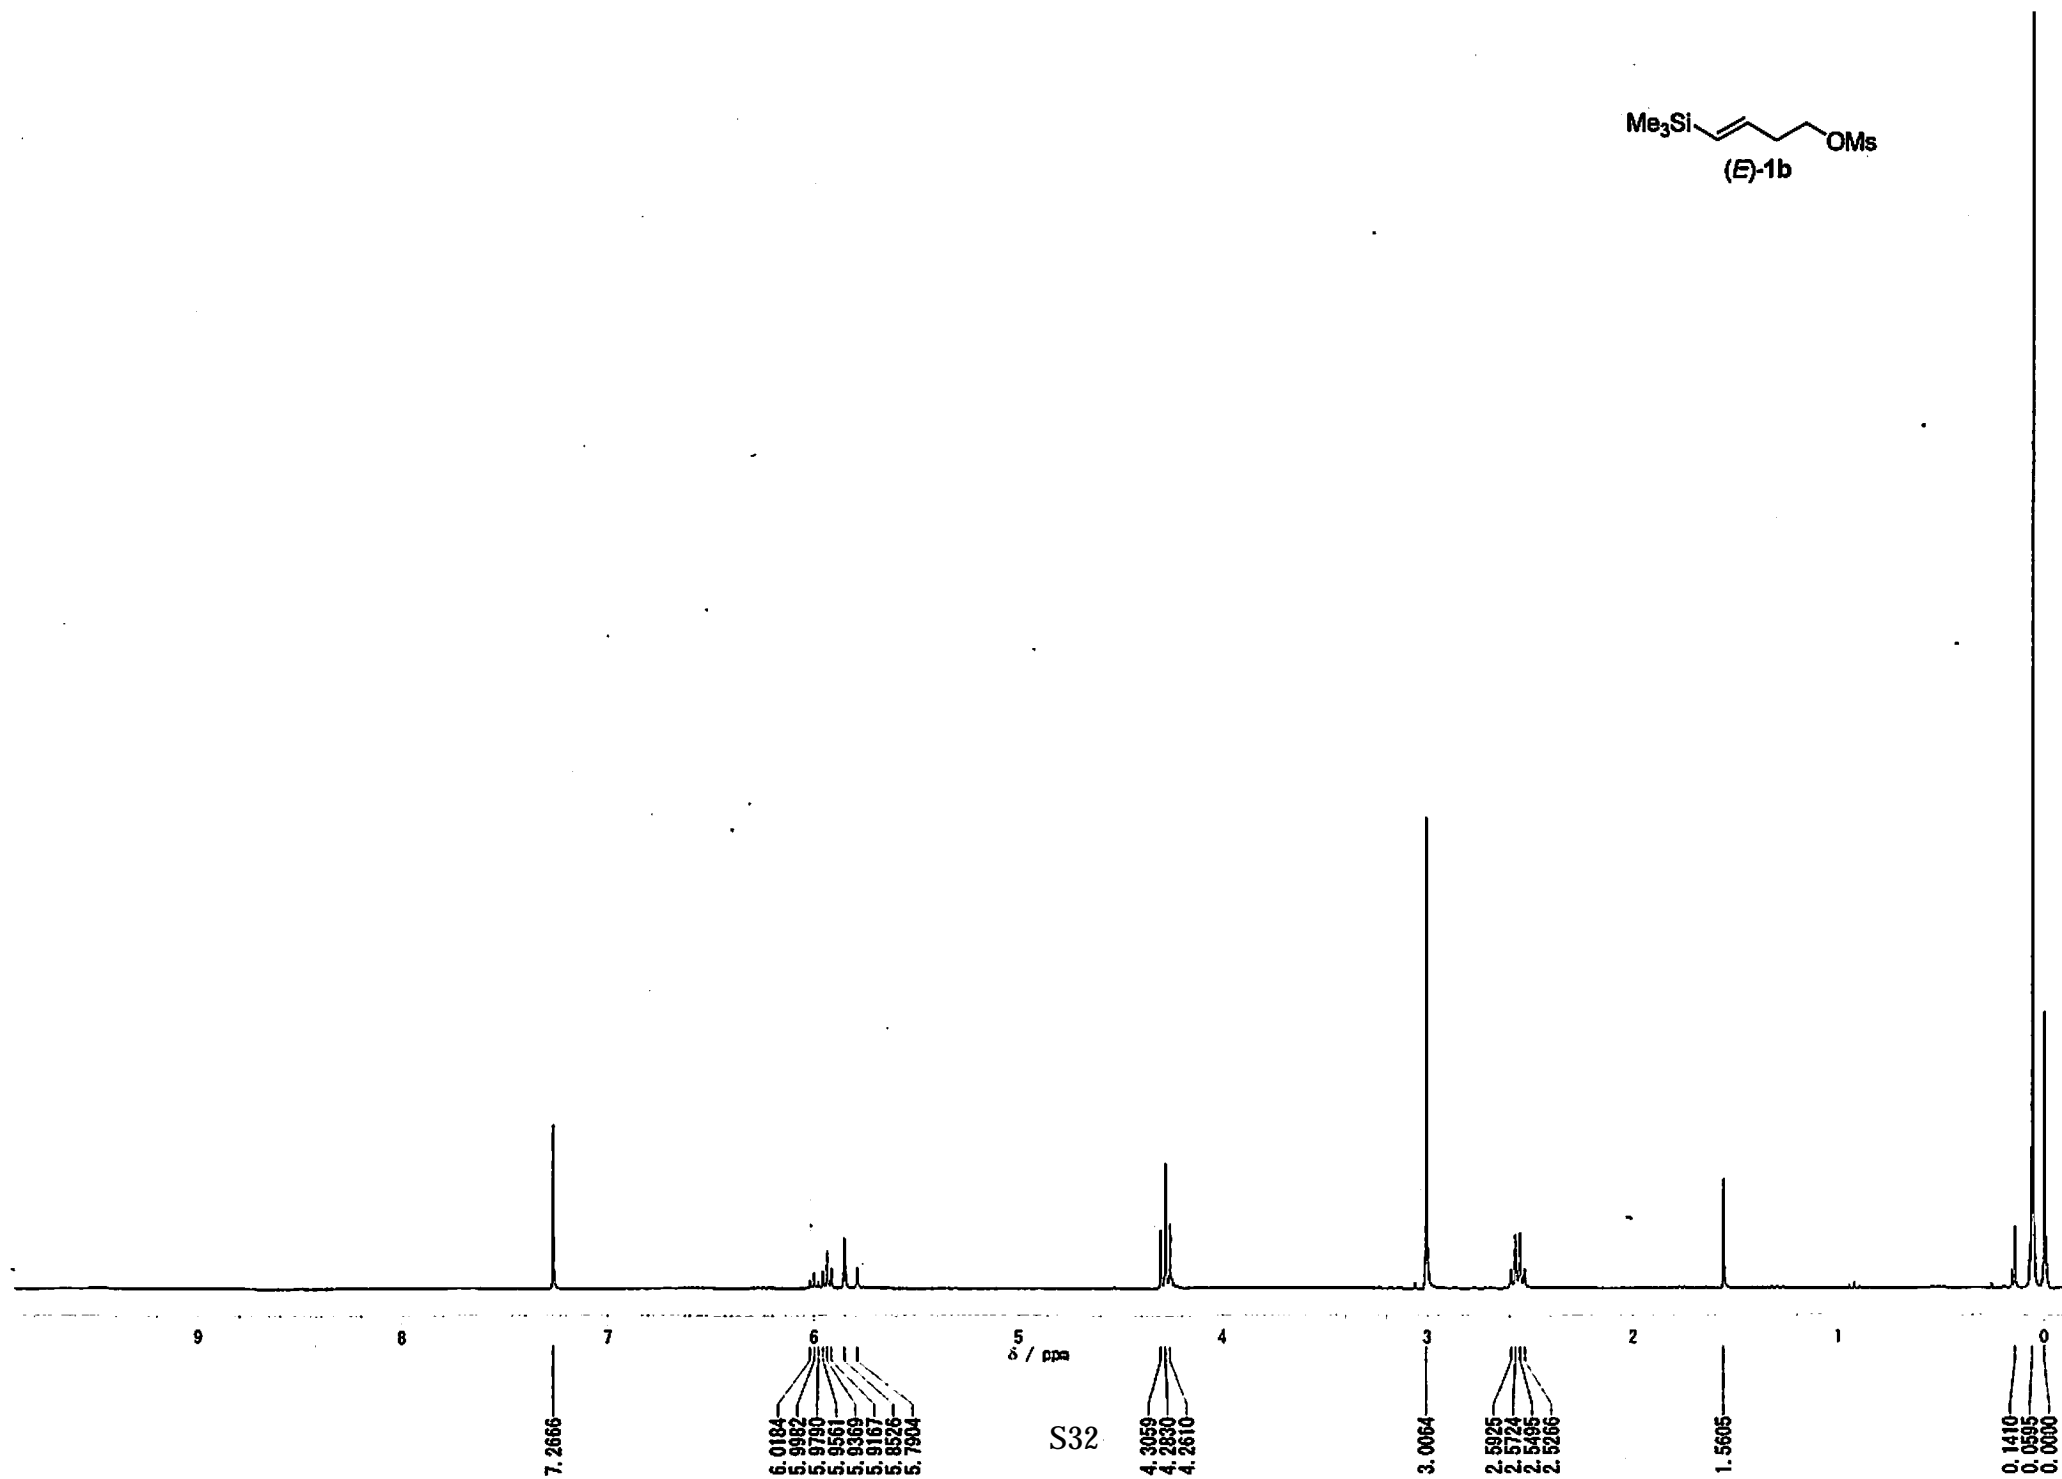



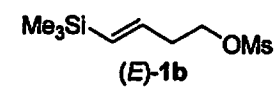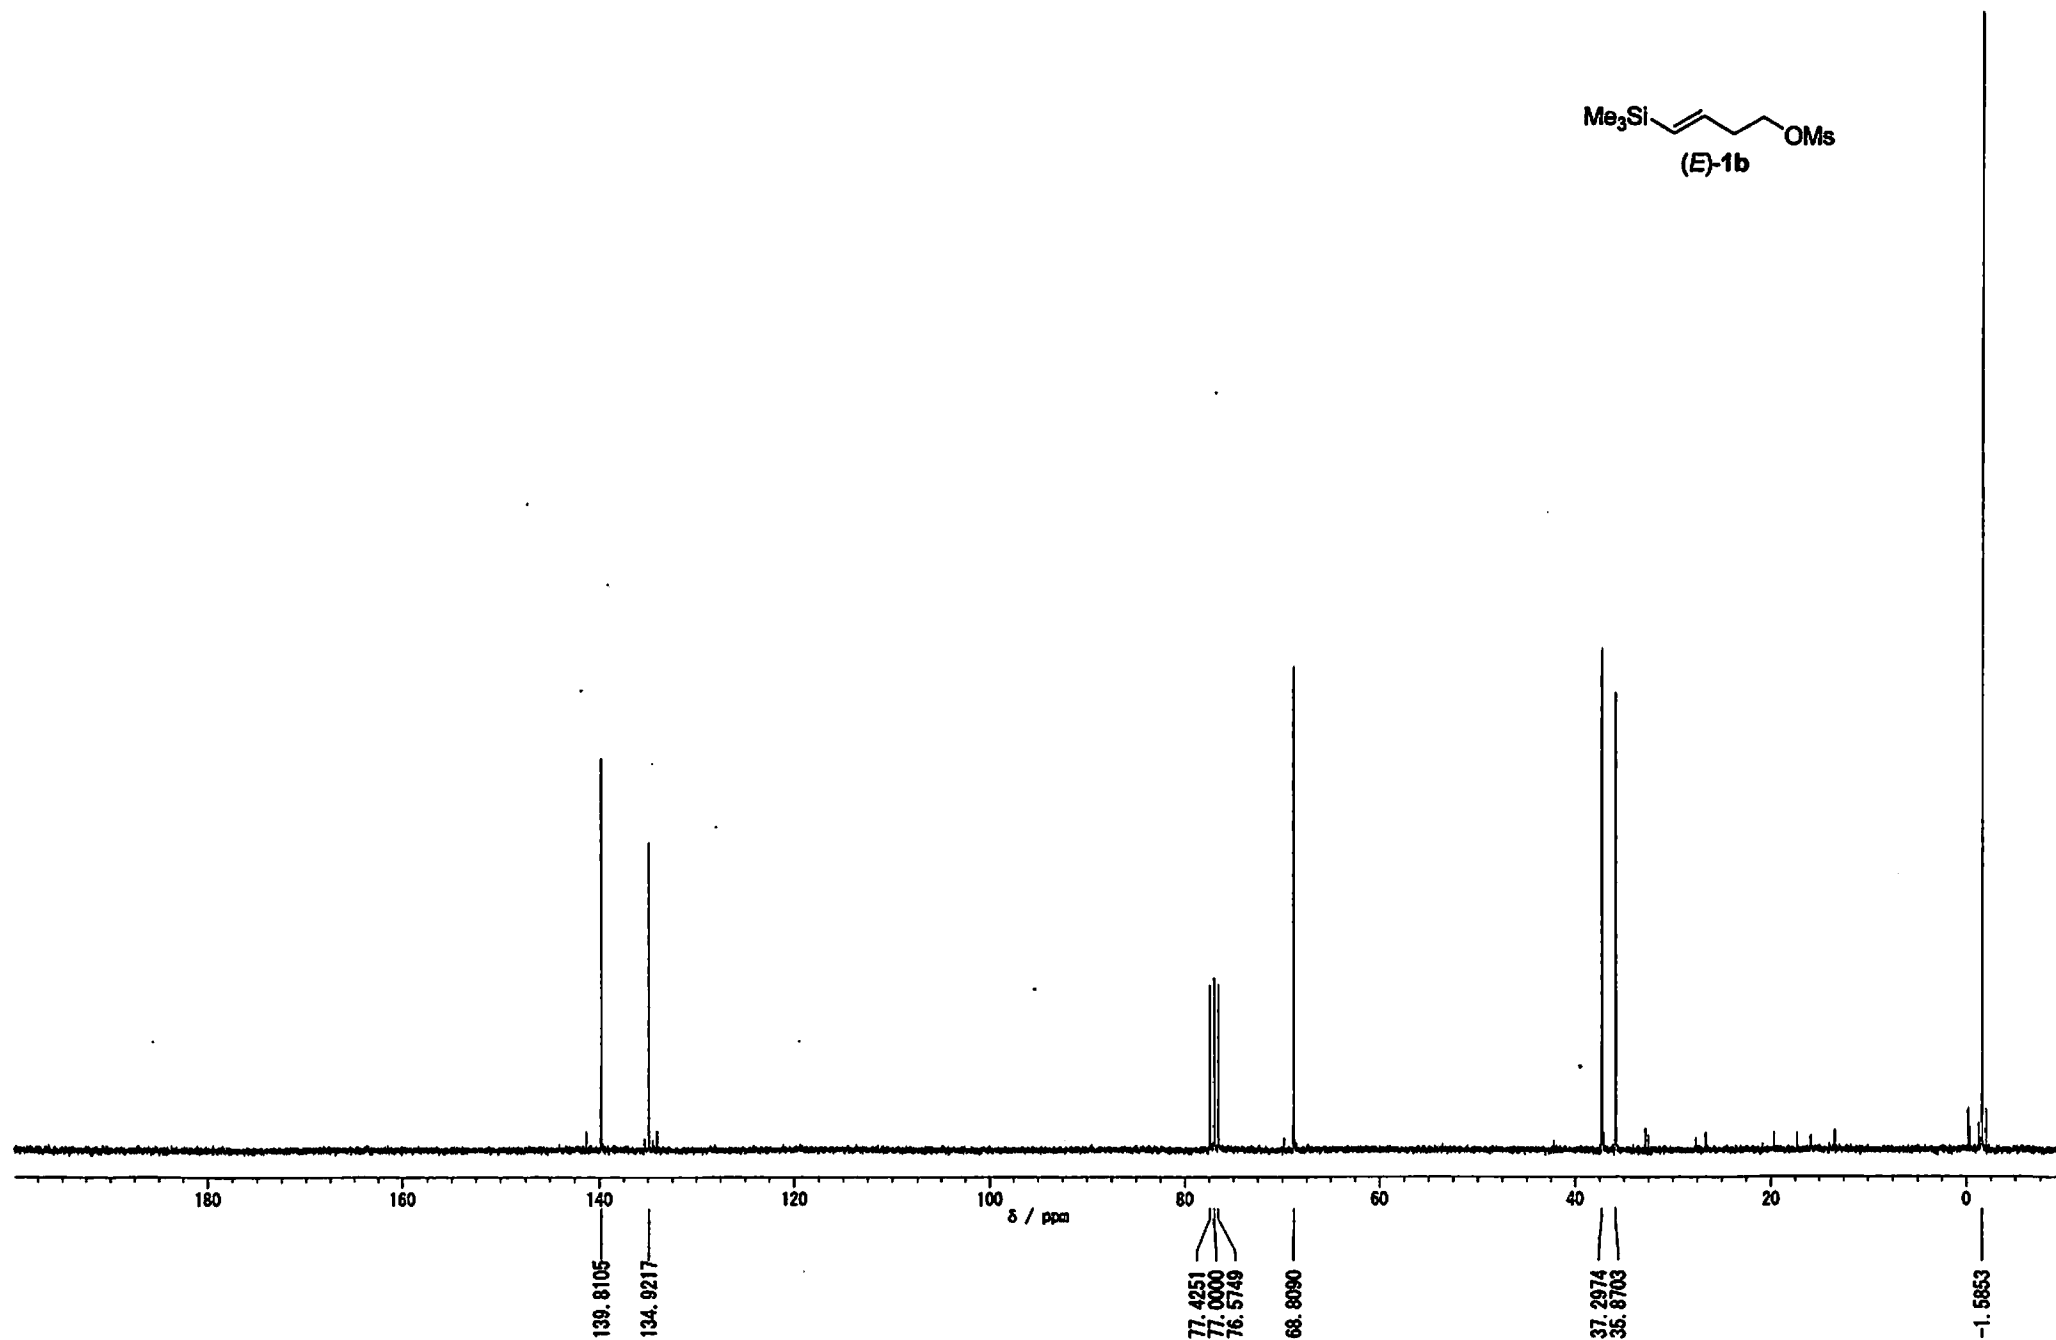

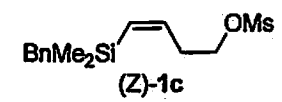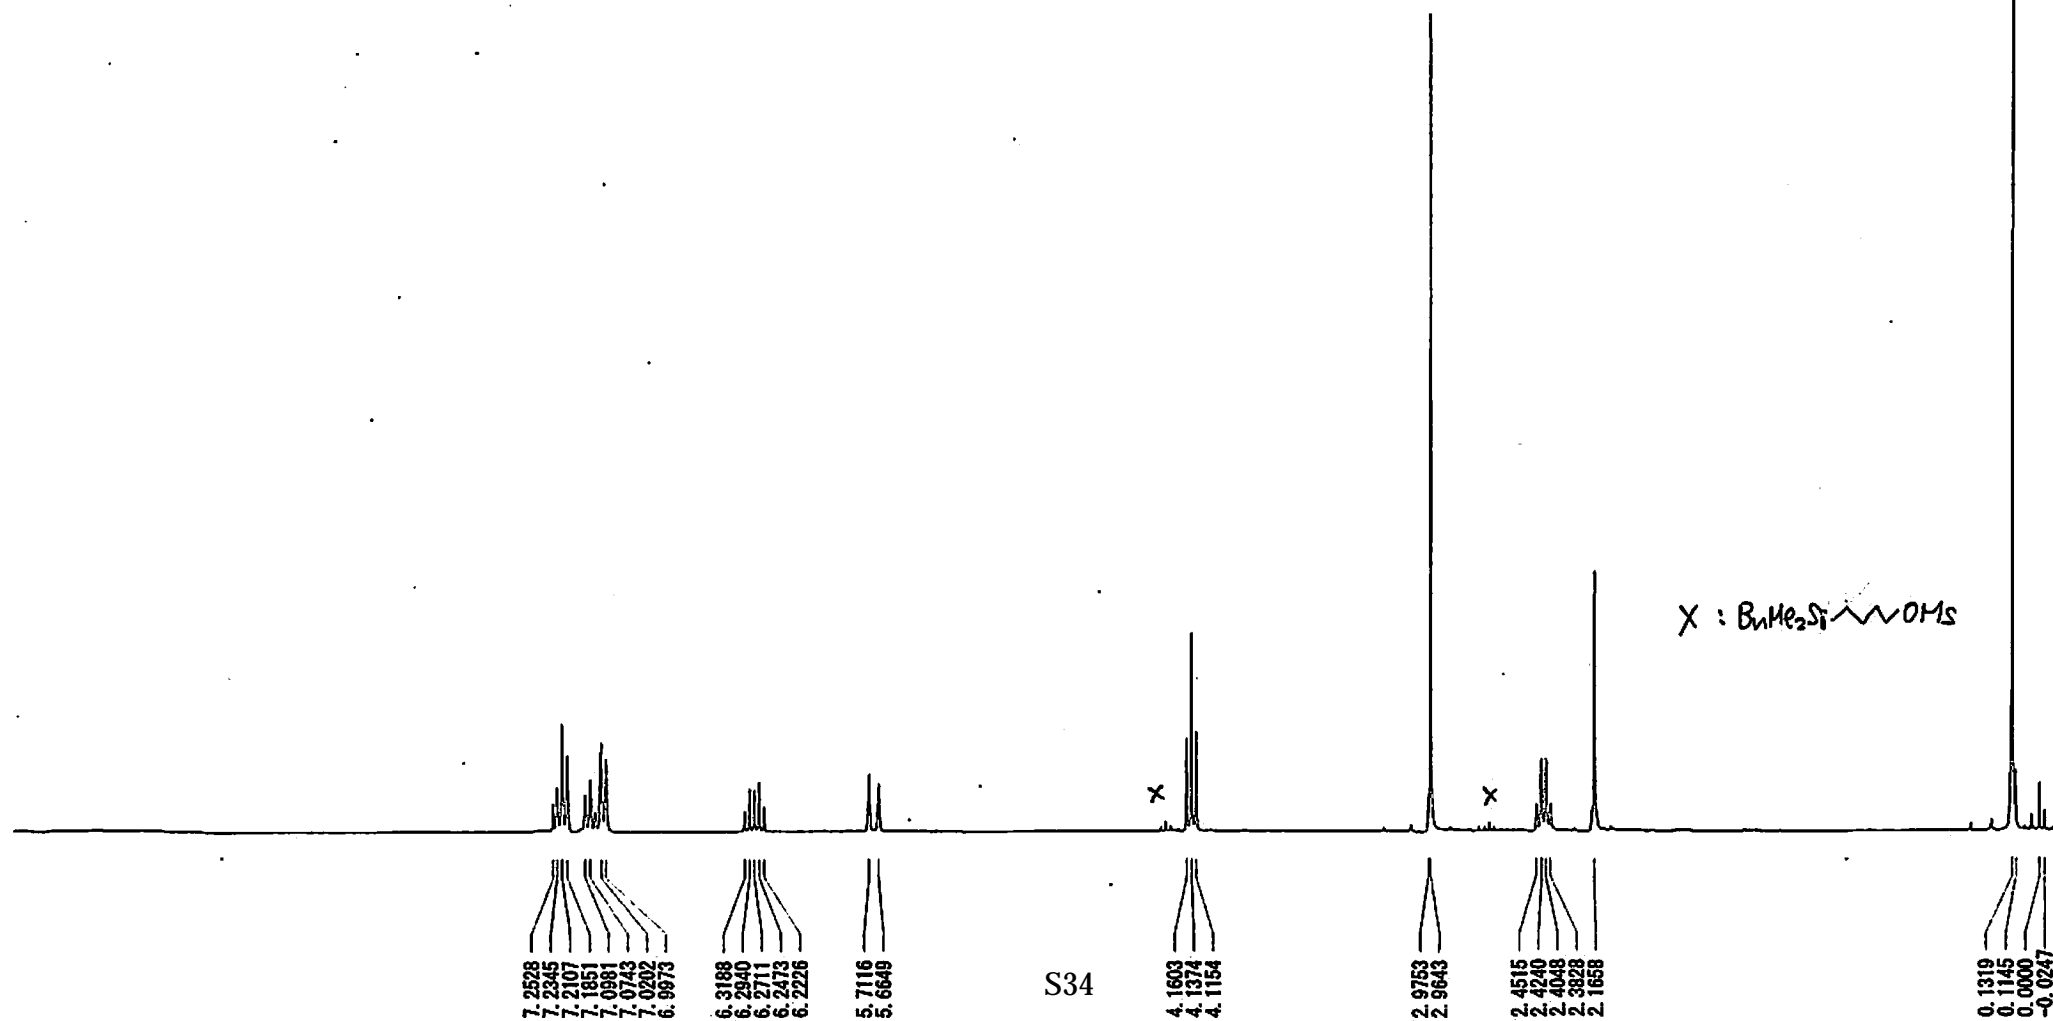

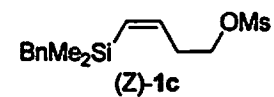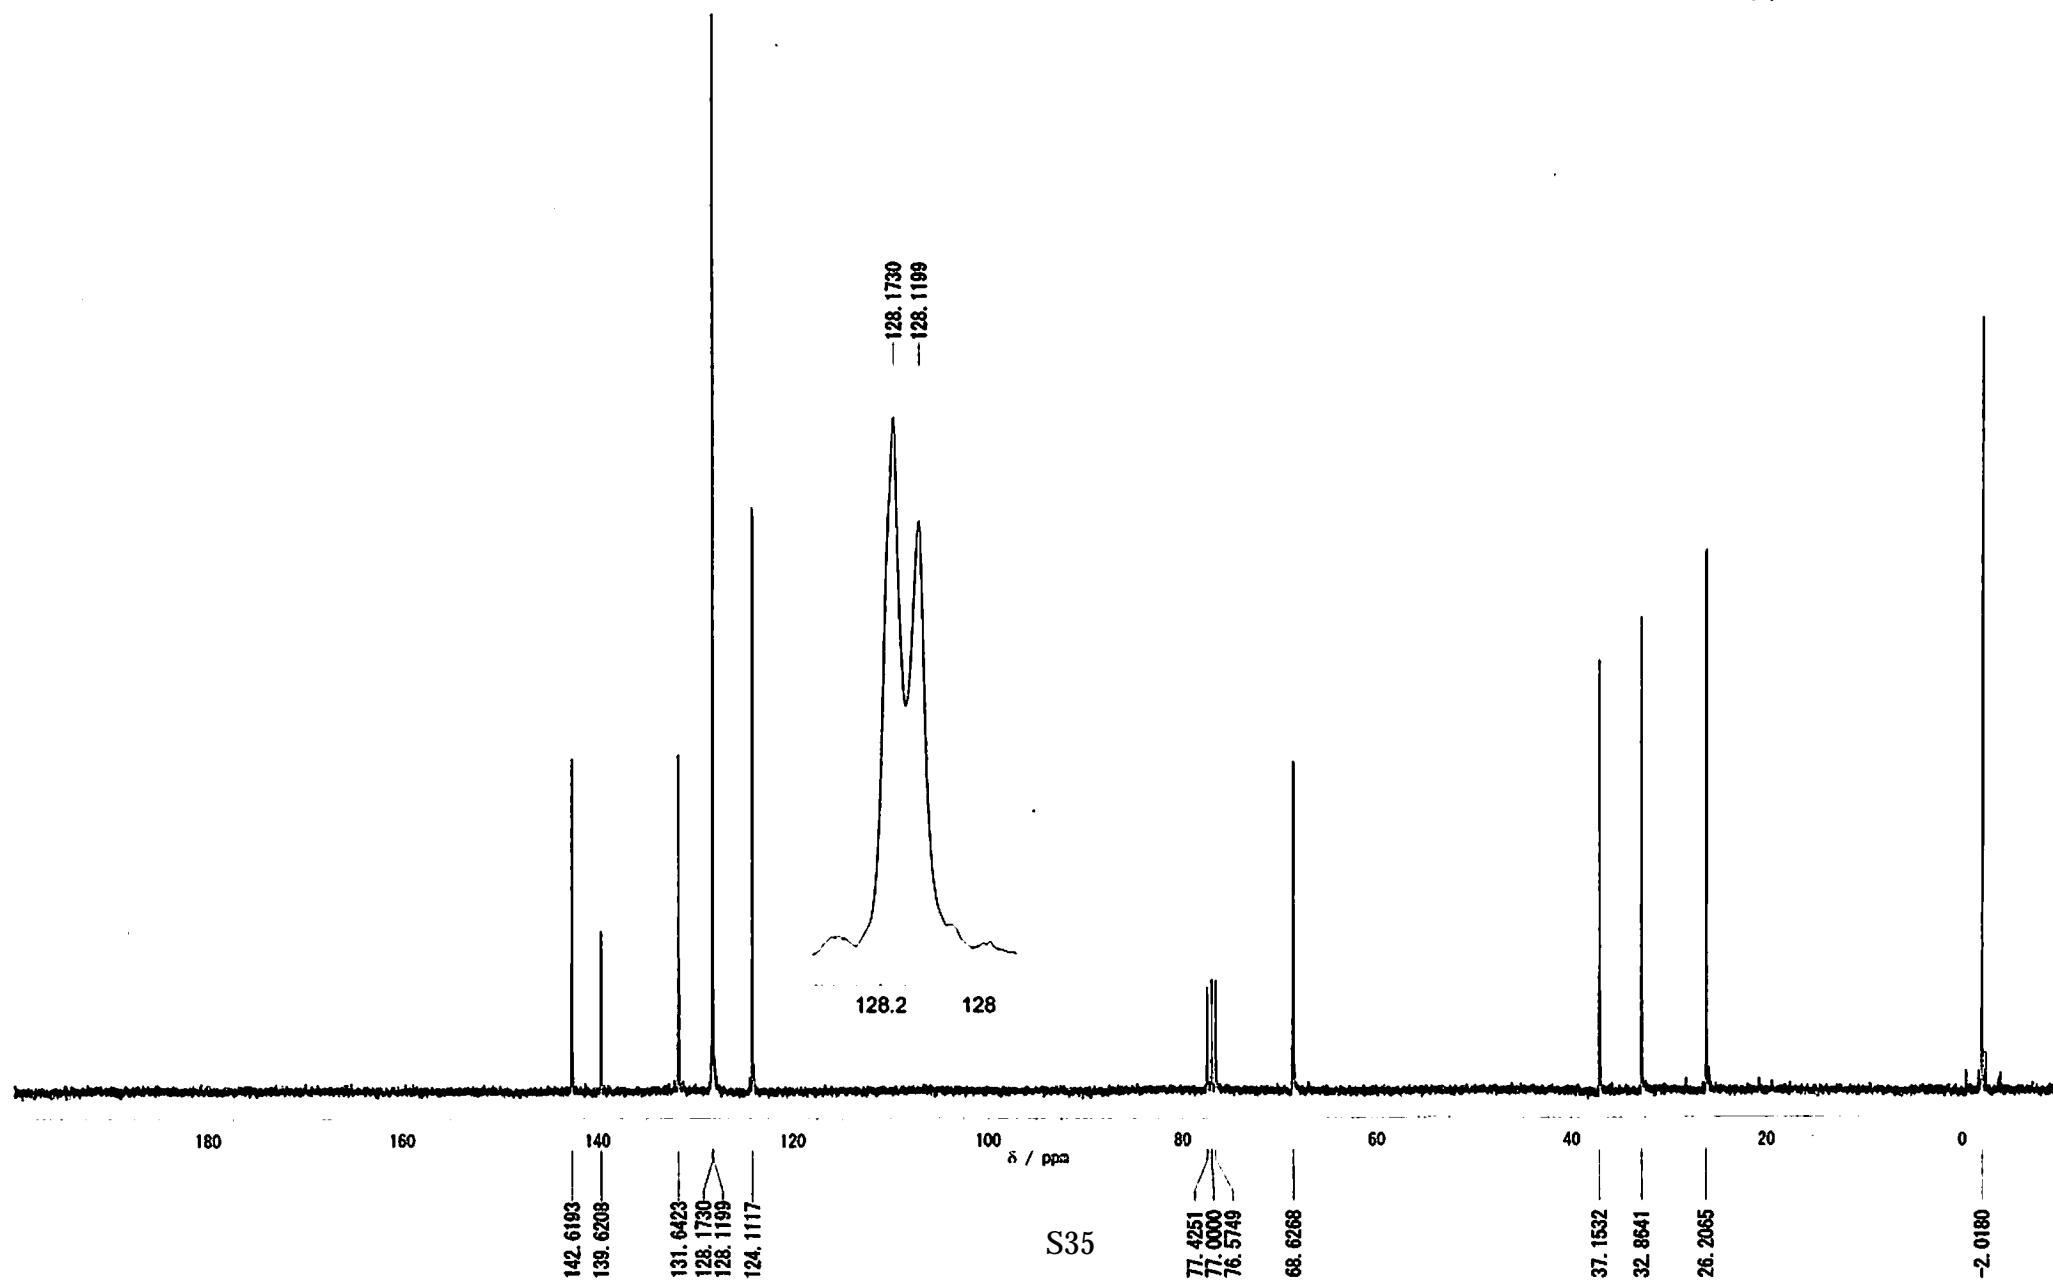

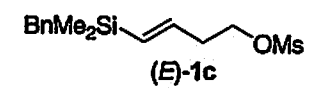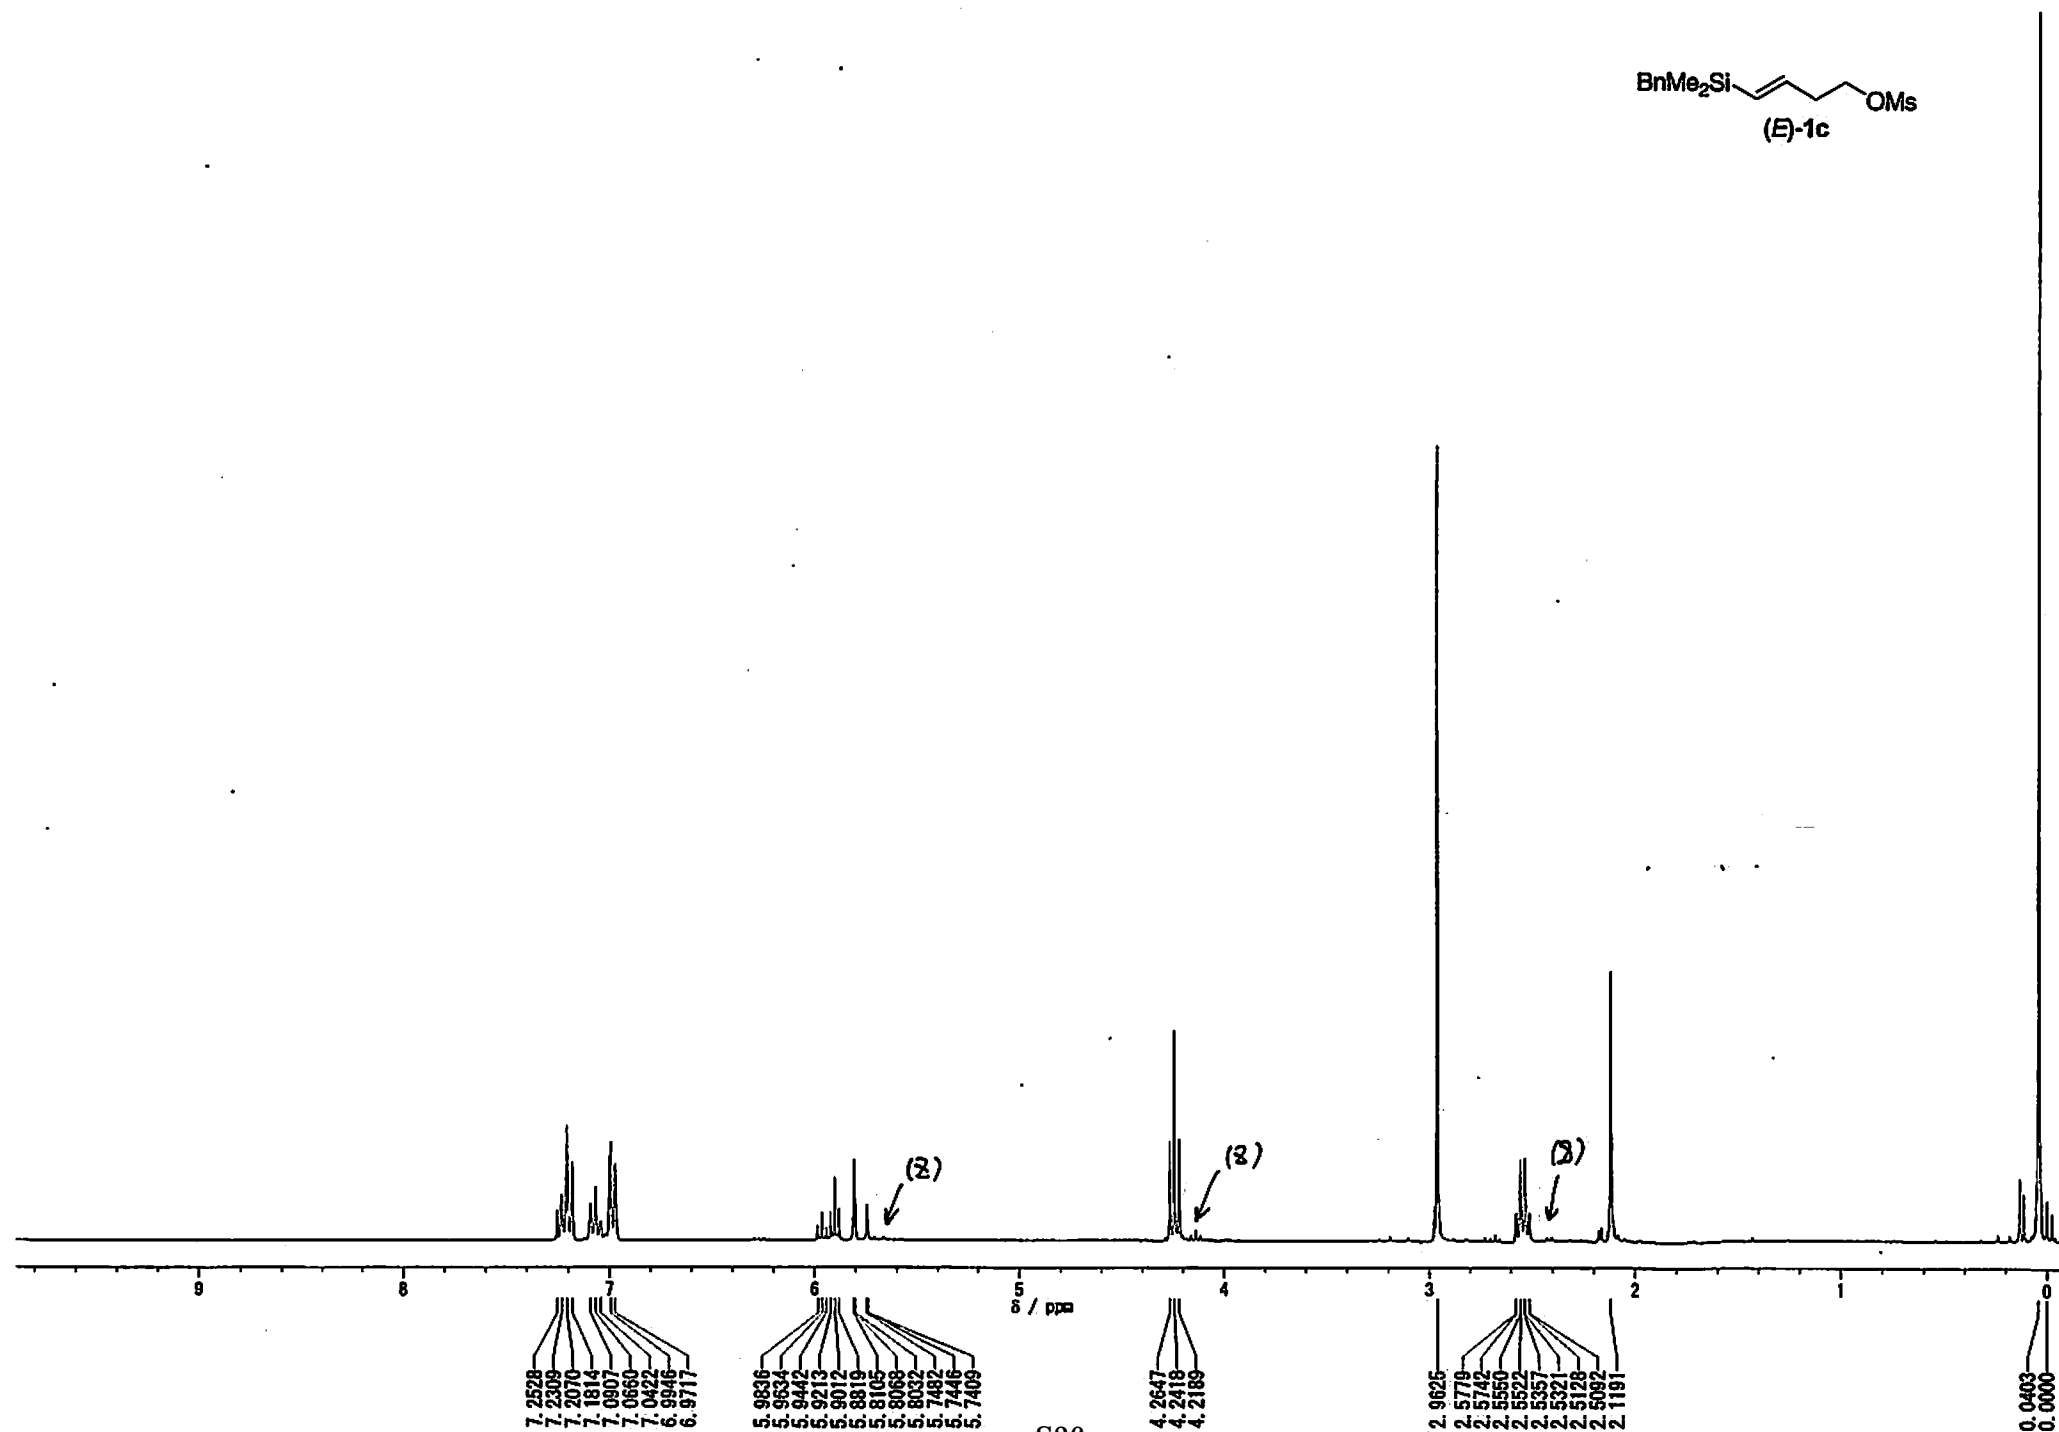

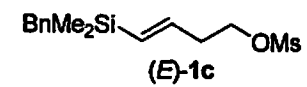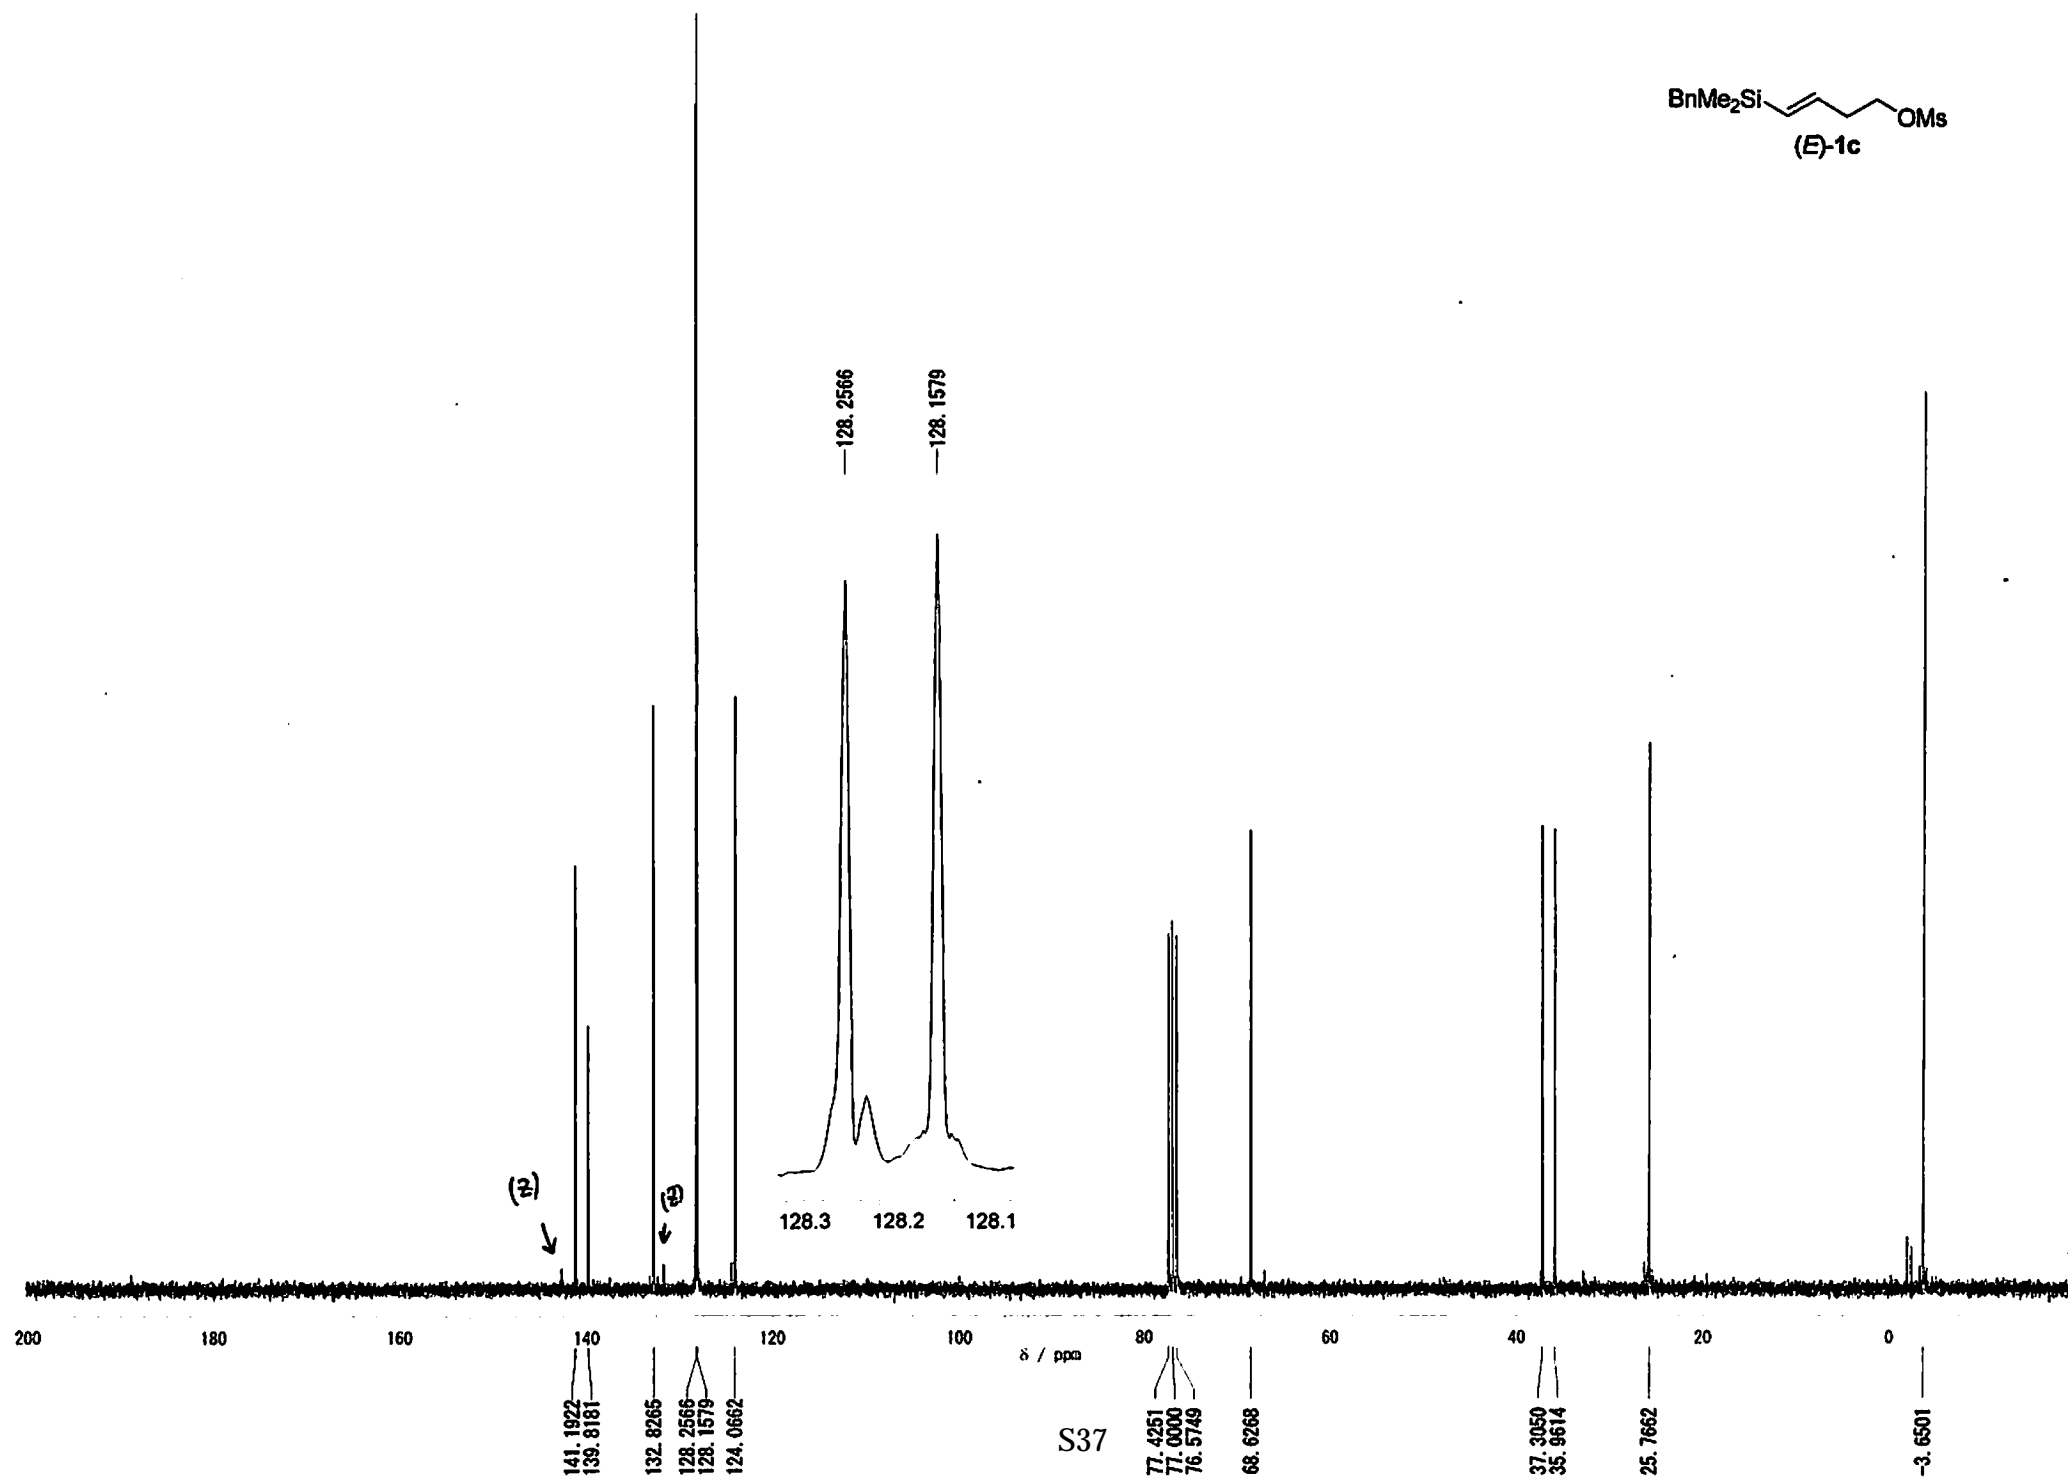

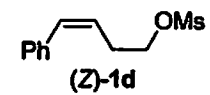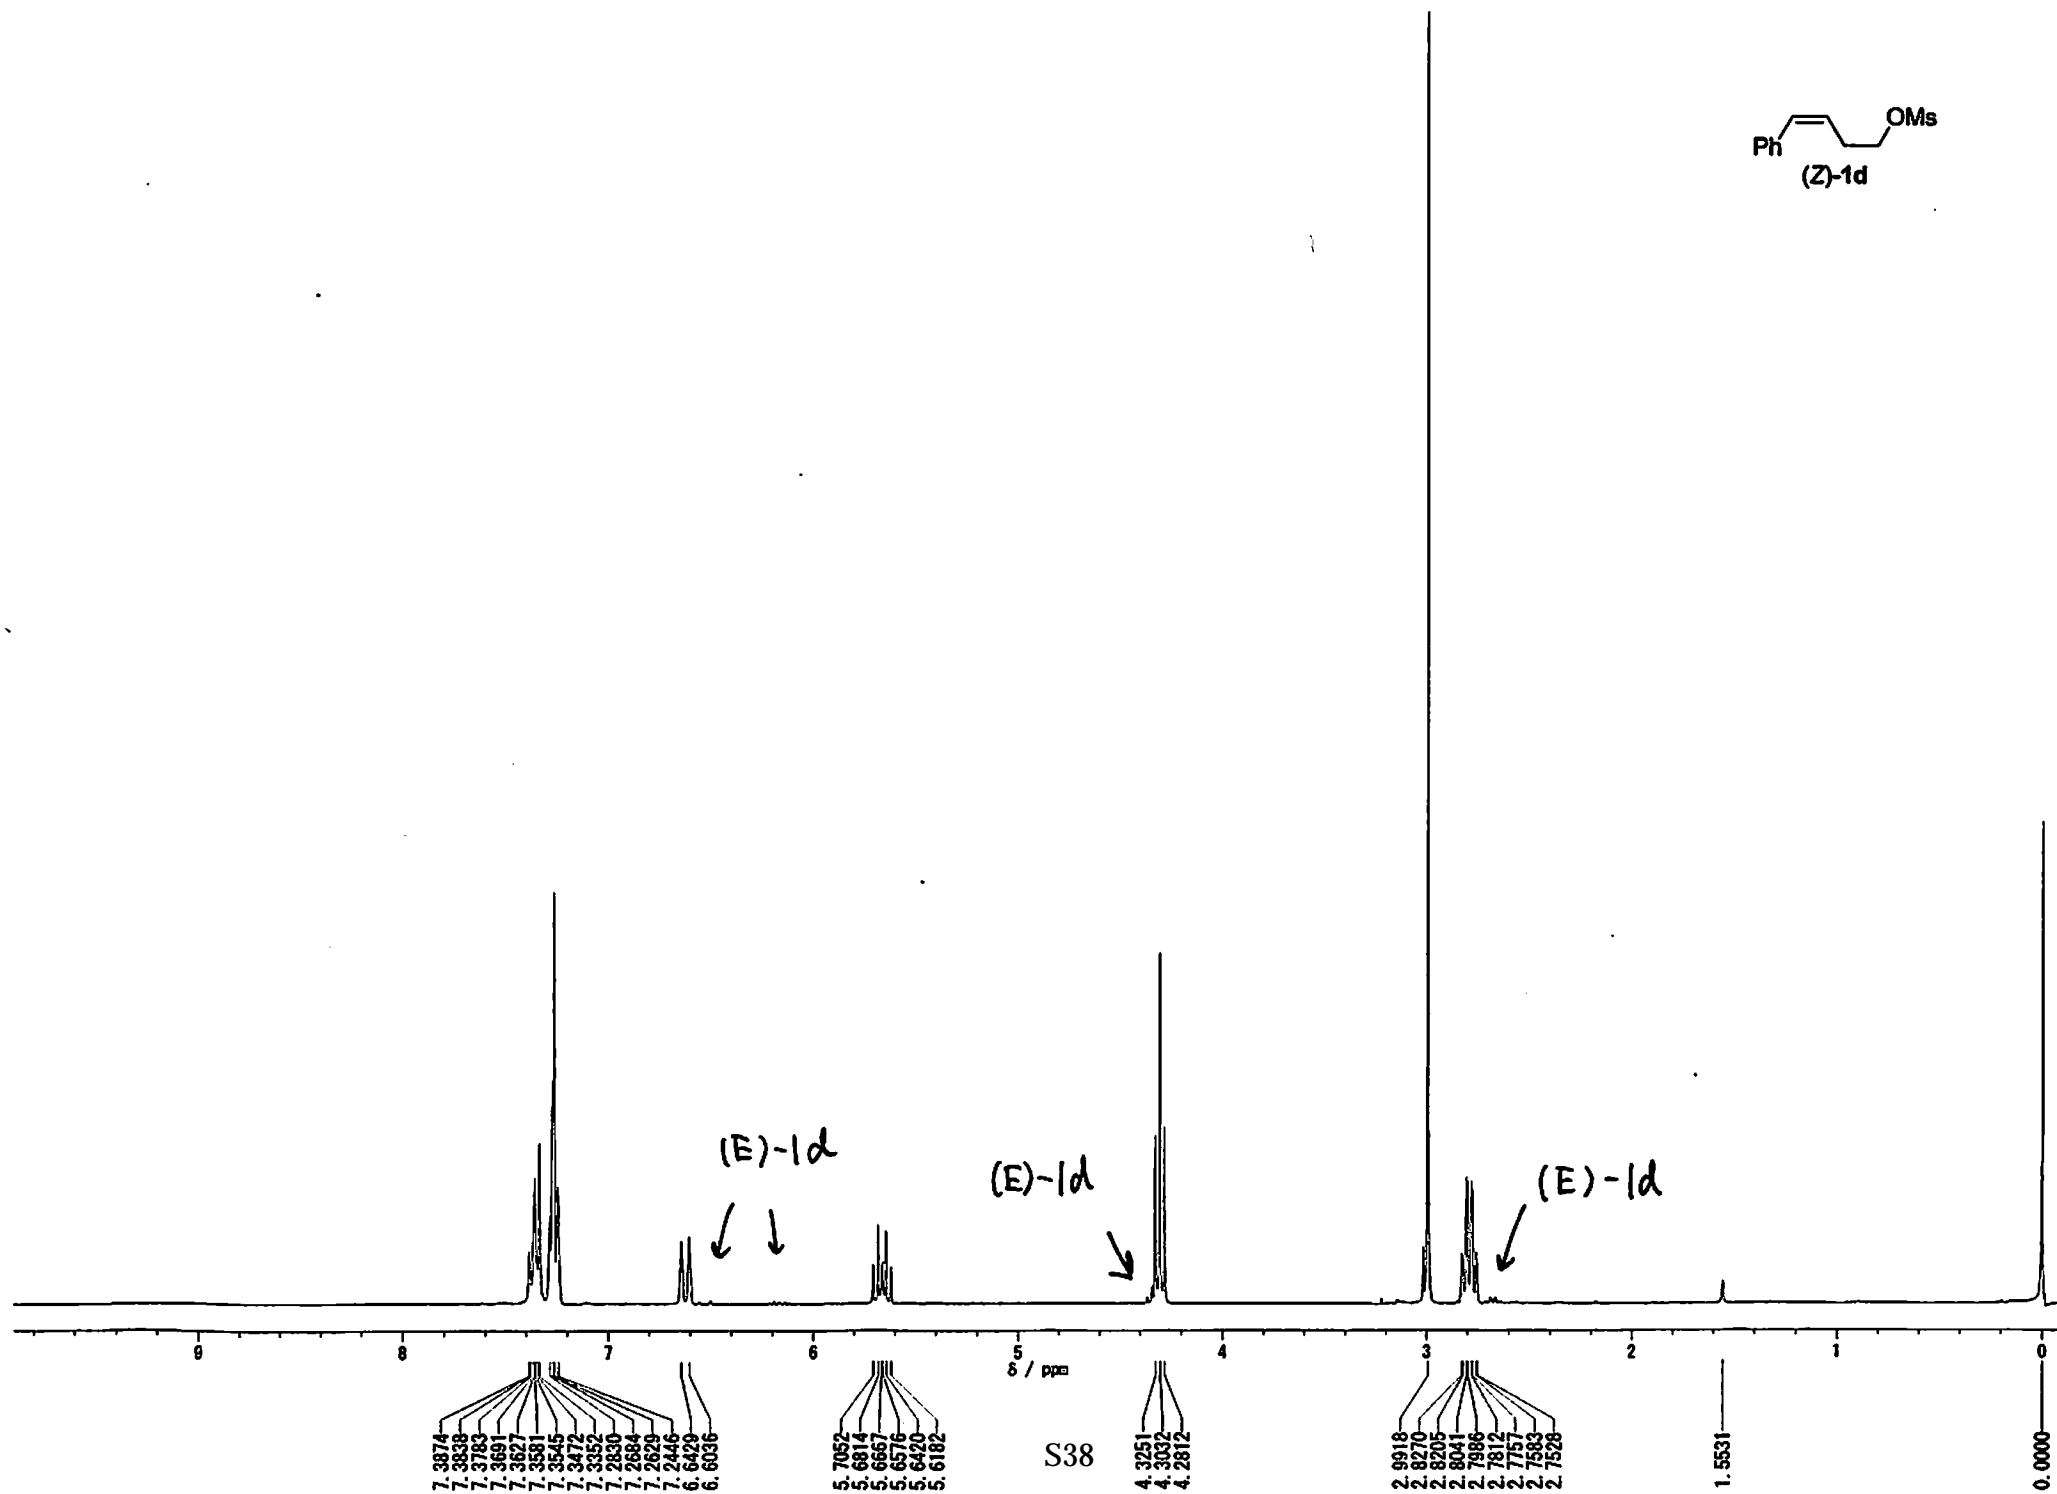

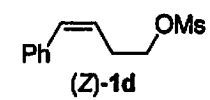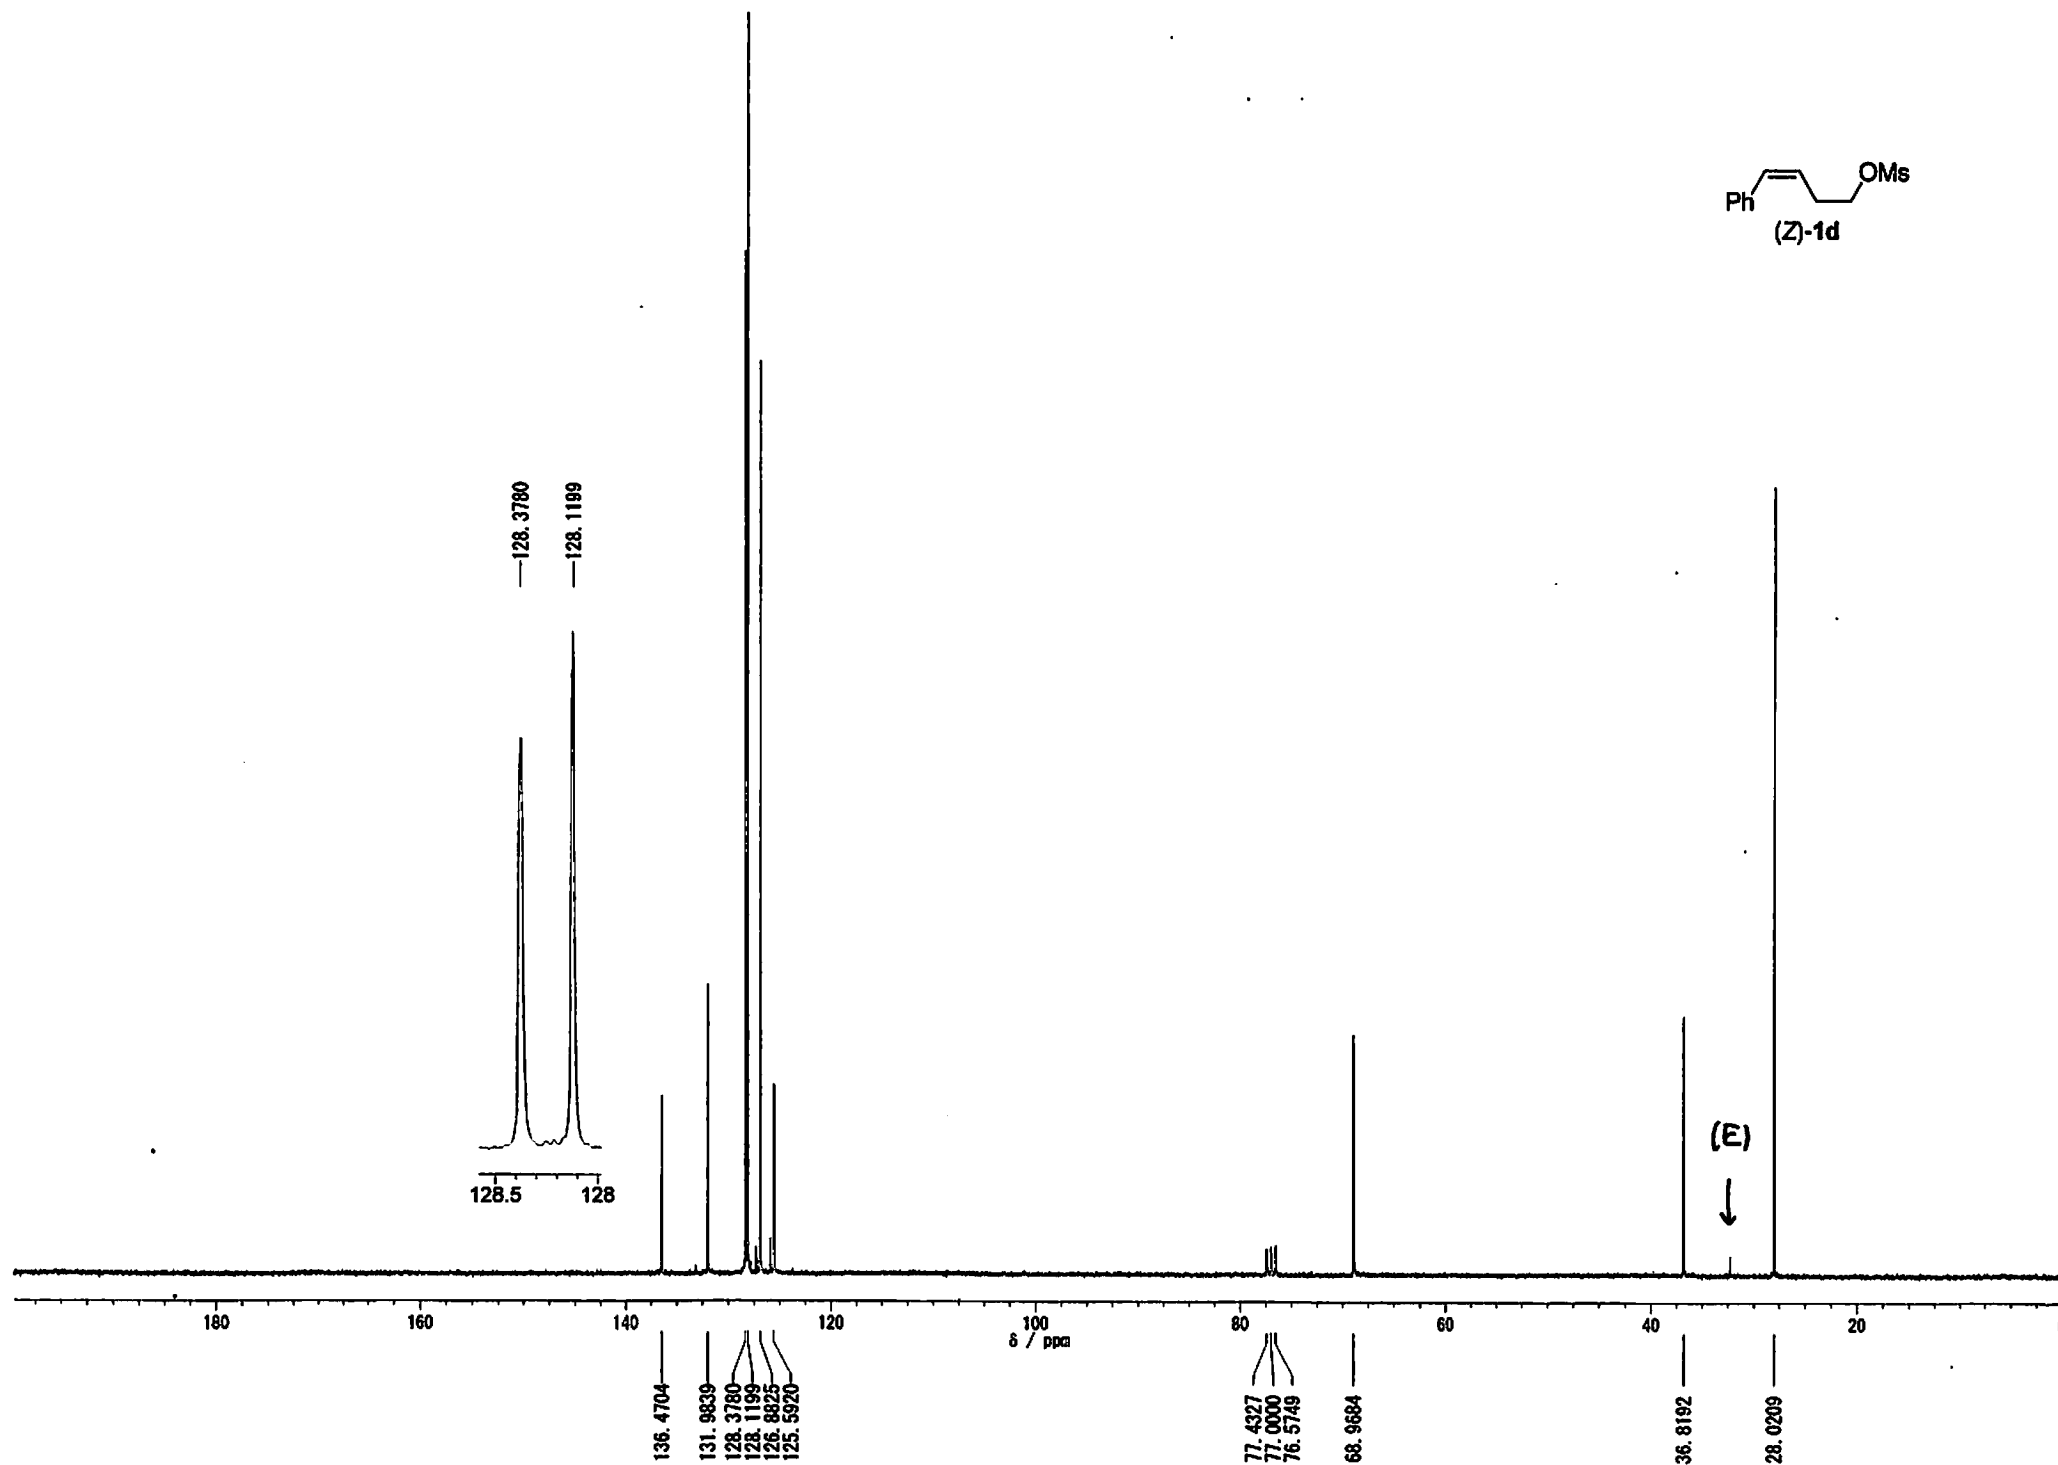

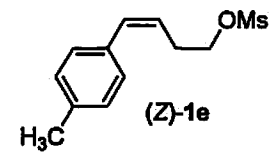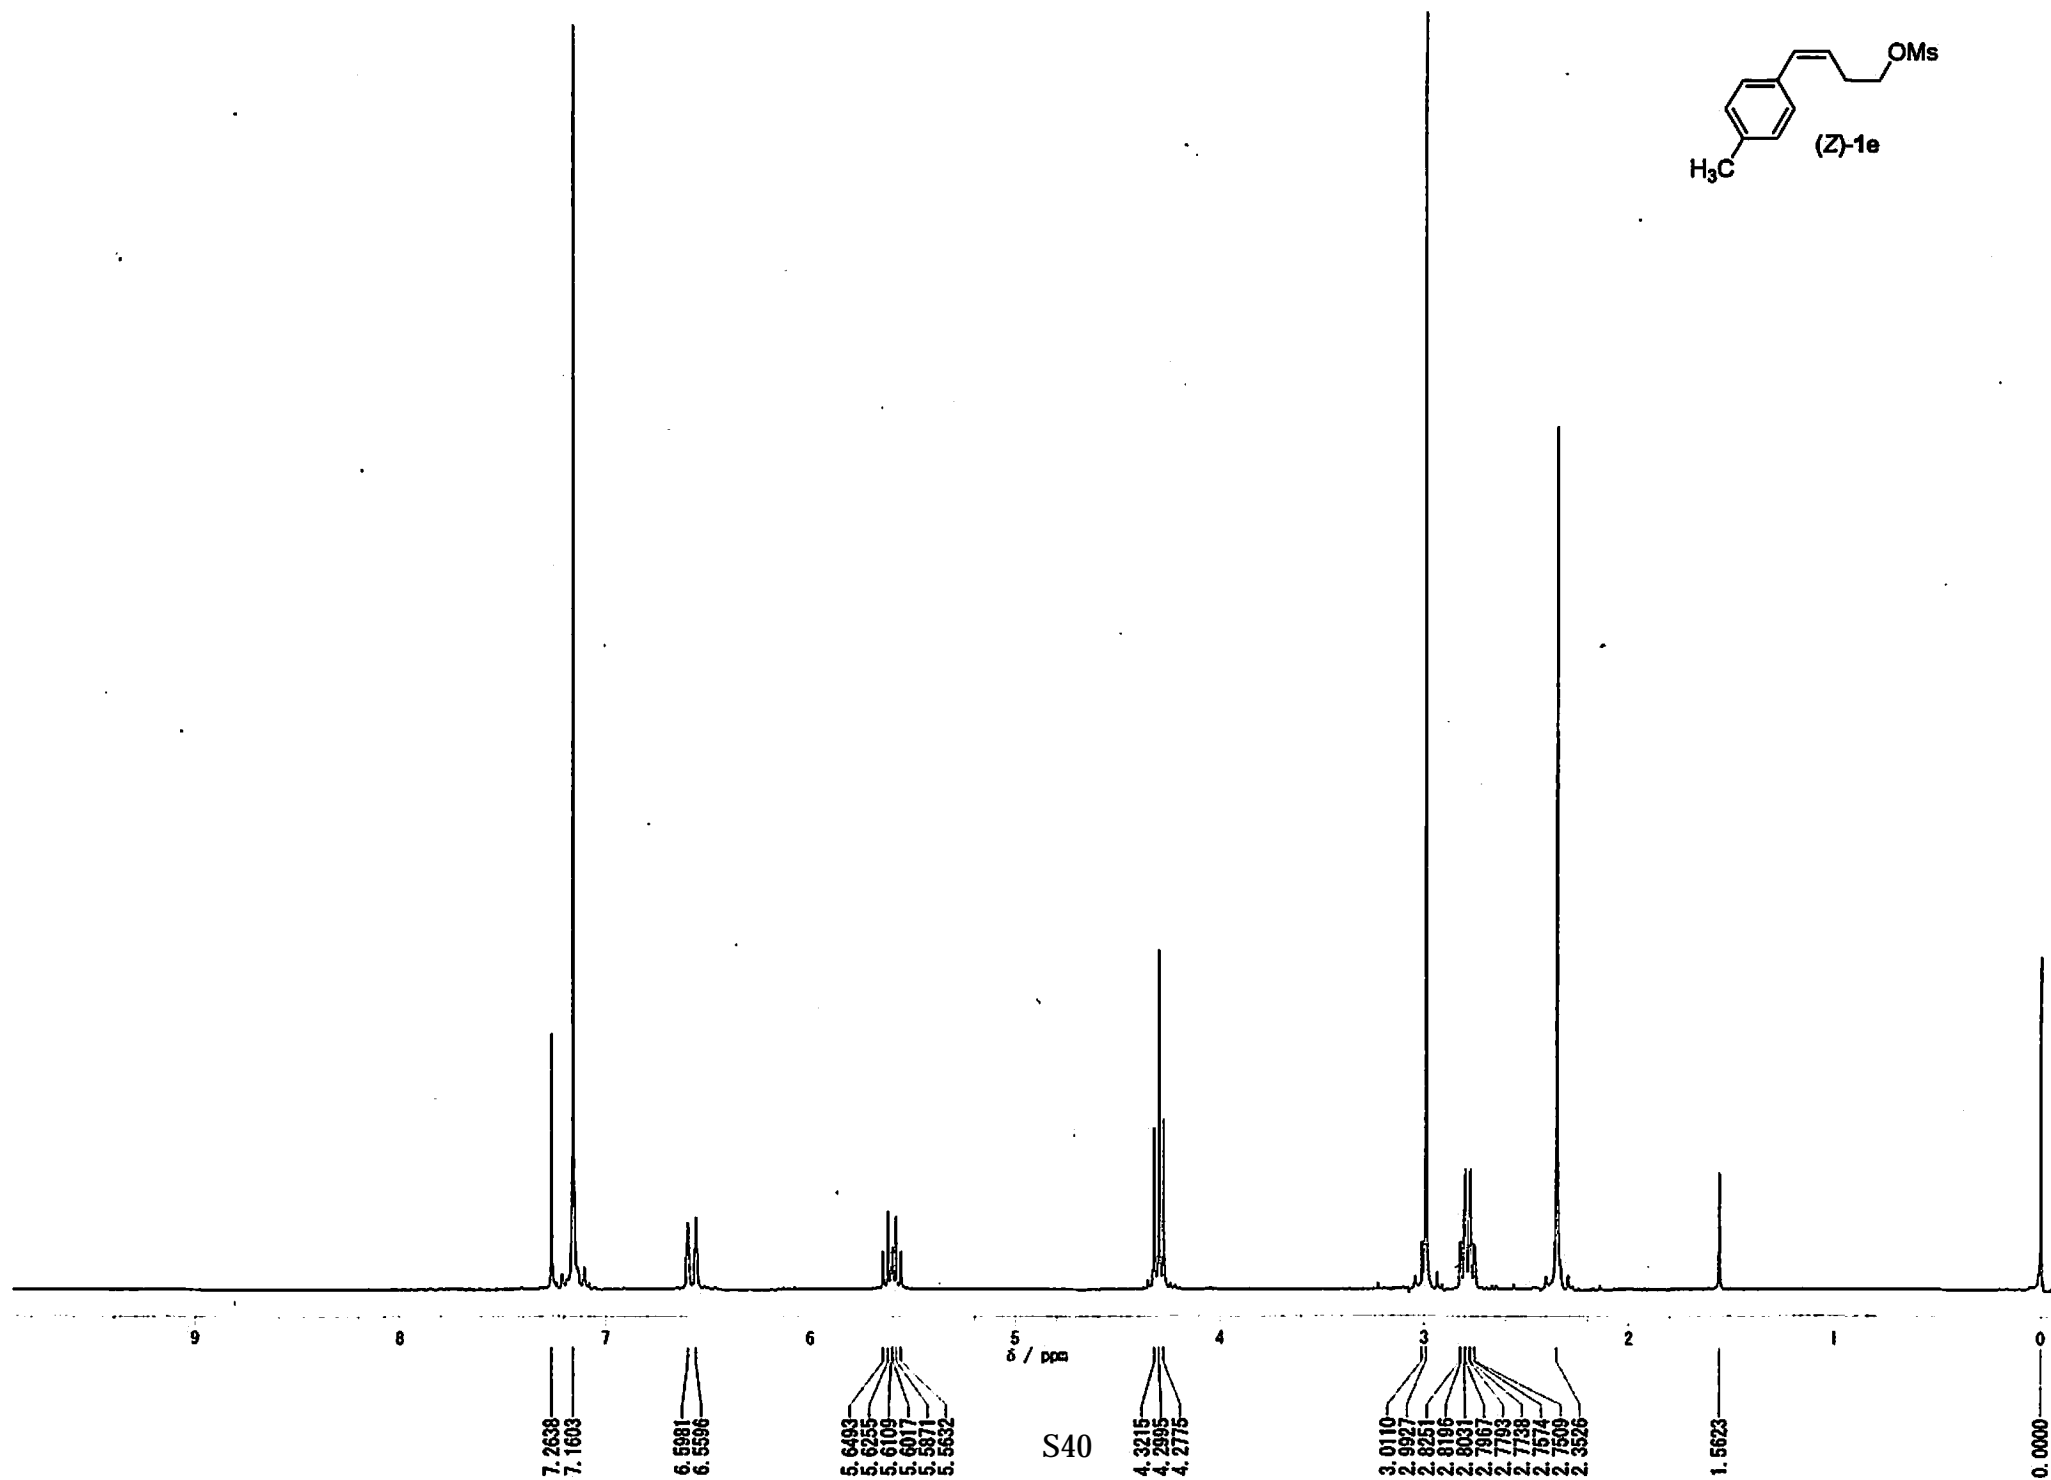



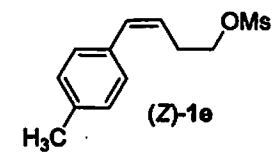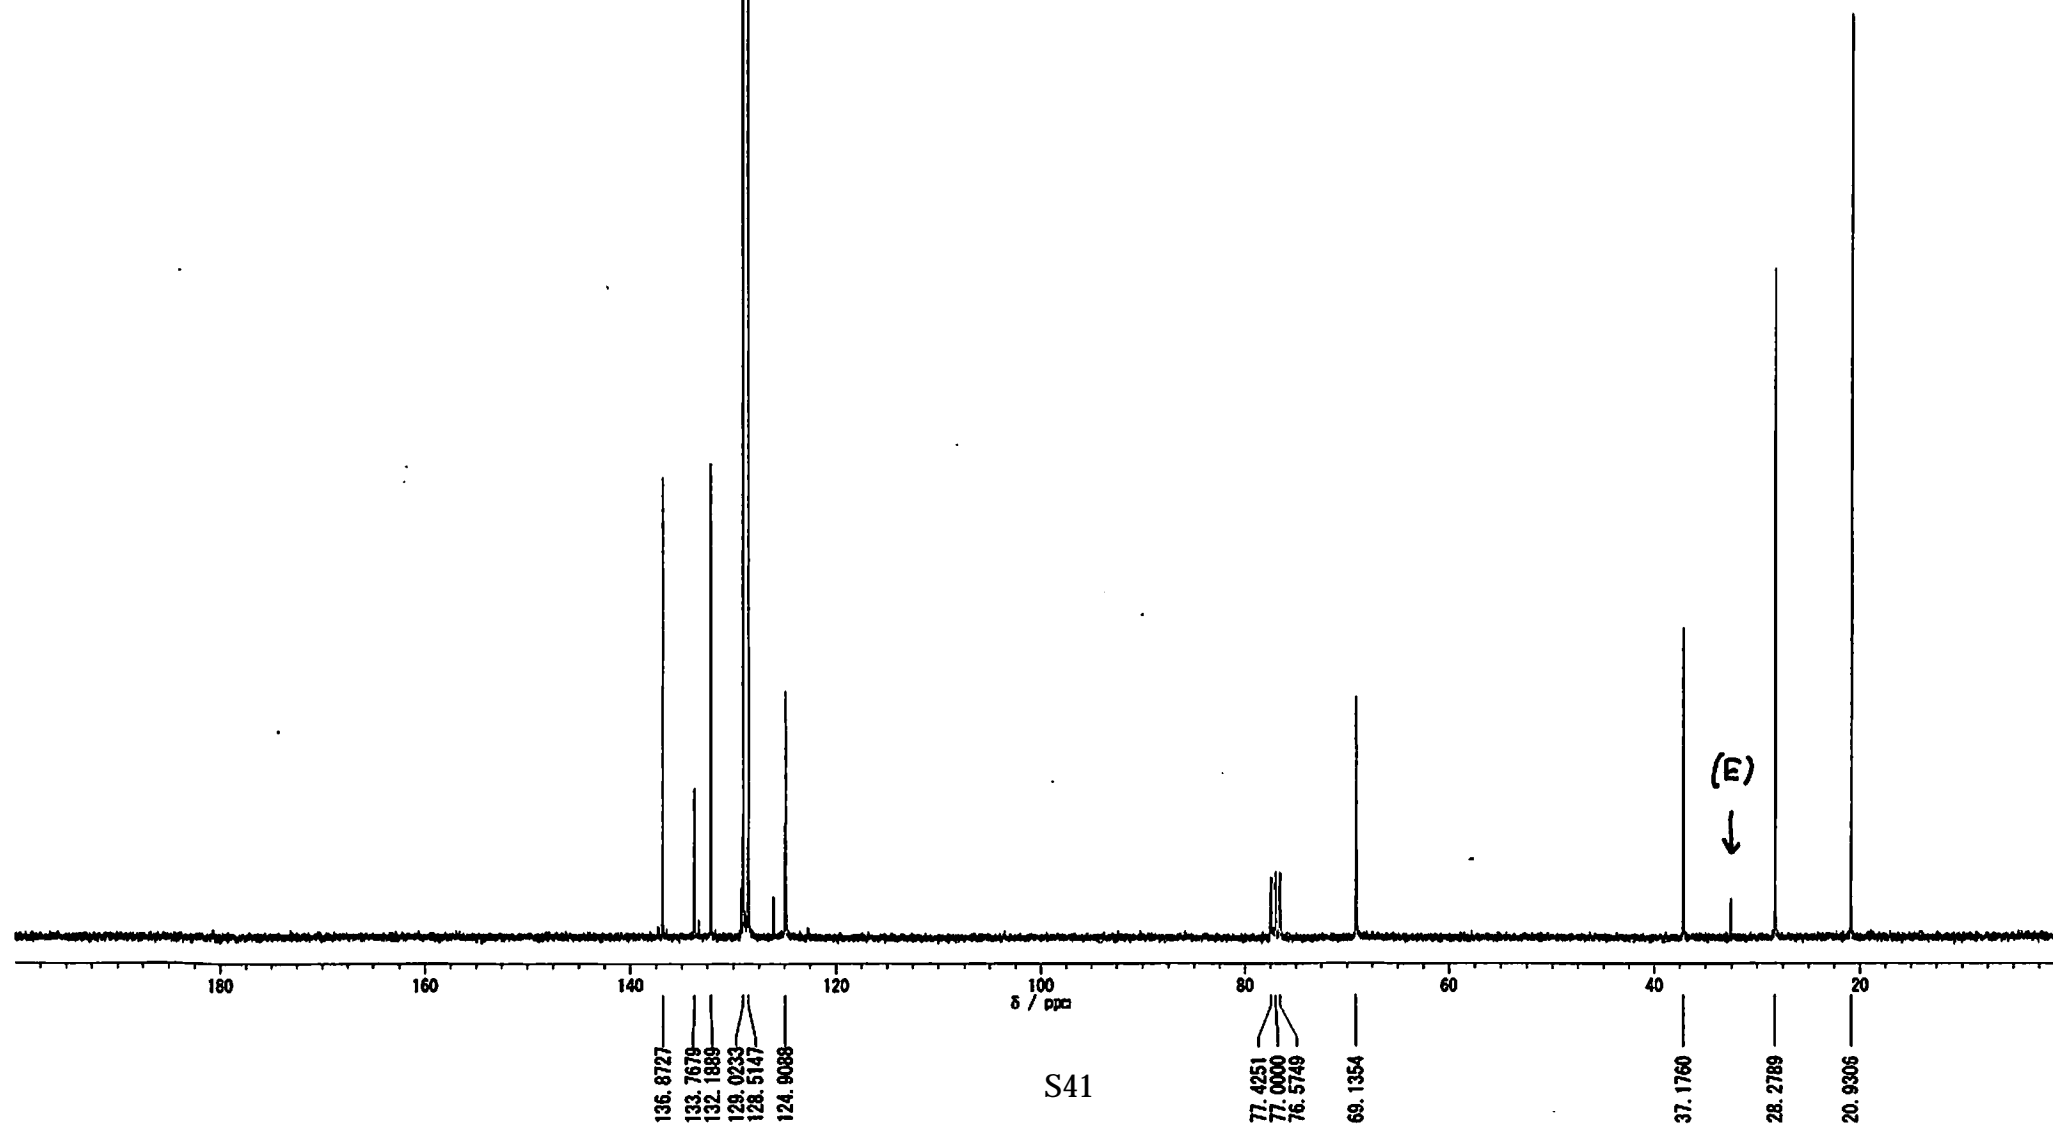

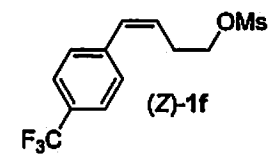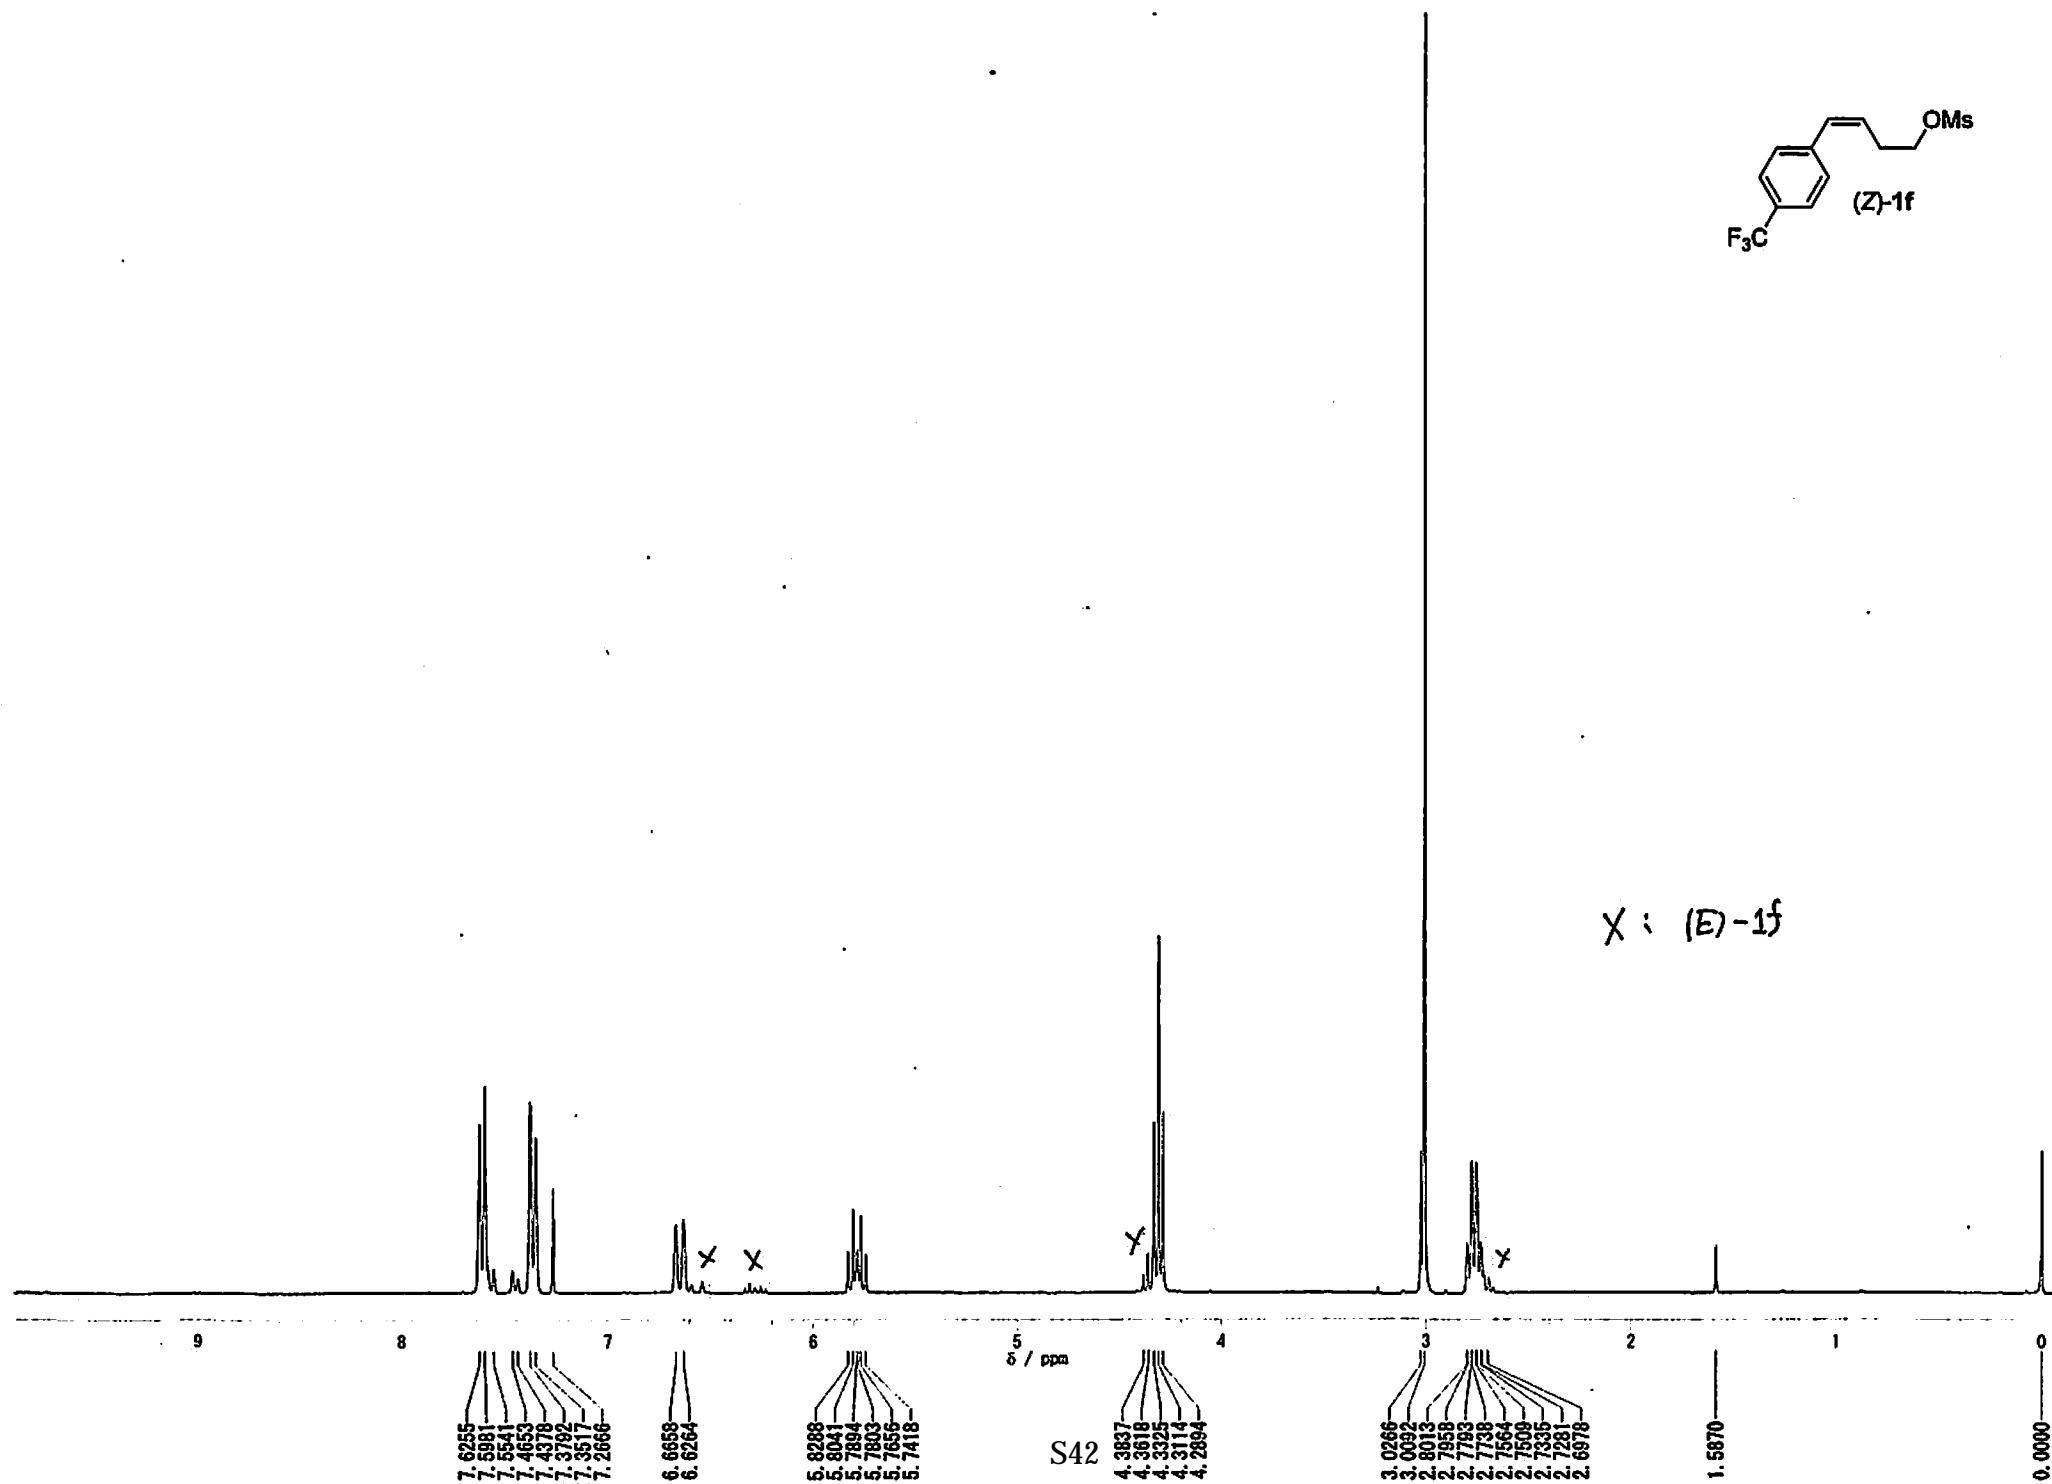

Original File: C:\DOCUMENTS AND SETTINGS\北海道大学\MY DOCUMENTS\DELL NMR データ 06Q1VTOYODAYTYD-609-5-C13.FID\FID  
Date 09-Dec-2011 00:00:00

Comment  
C13 Standard Observe  
Stick-note Tune=6.4 Match=0.1

ObsNuc 13C  
ExBode NMR  
ObsFreq 75.43 MHz  
ObsSet -1.0 kHz  
ObsFine 996.3672 Hz  
Point 32768  
Frequency(Span) 18761.73 Hz  
Scan 640  
AcqTime 1.4992 s  
PD 1.501 s  
Pulse 6.0 μs  
Temperature 29.0 °C  
Solvent CDCl<sub>3</sub>  
Reference 77.0 ppm  
Broad Factor 0.2863 Hz  
Gain 30  
Printed 2010/Feb/28 16:08:31  
Operator

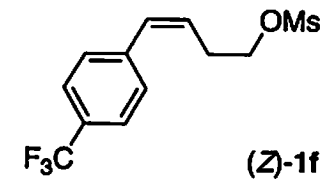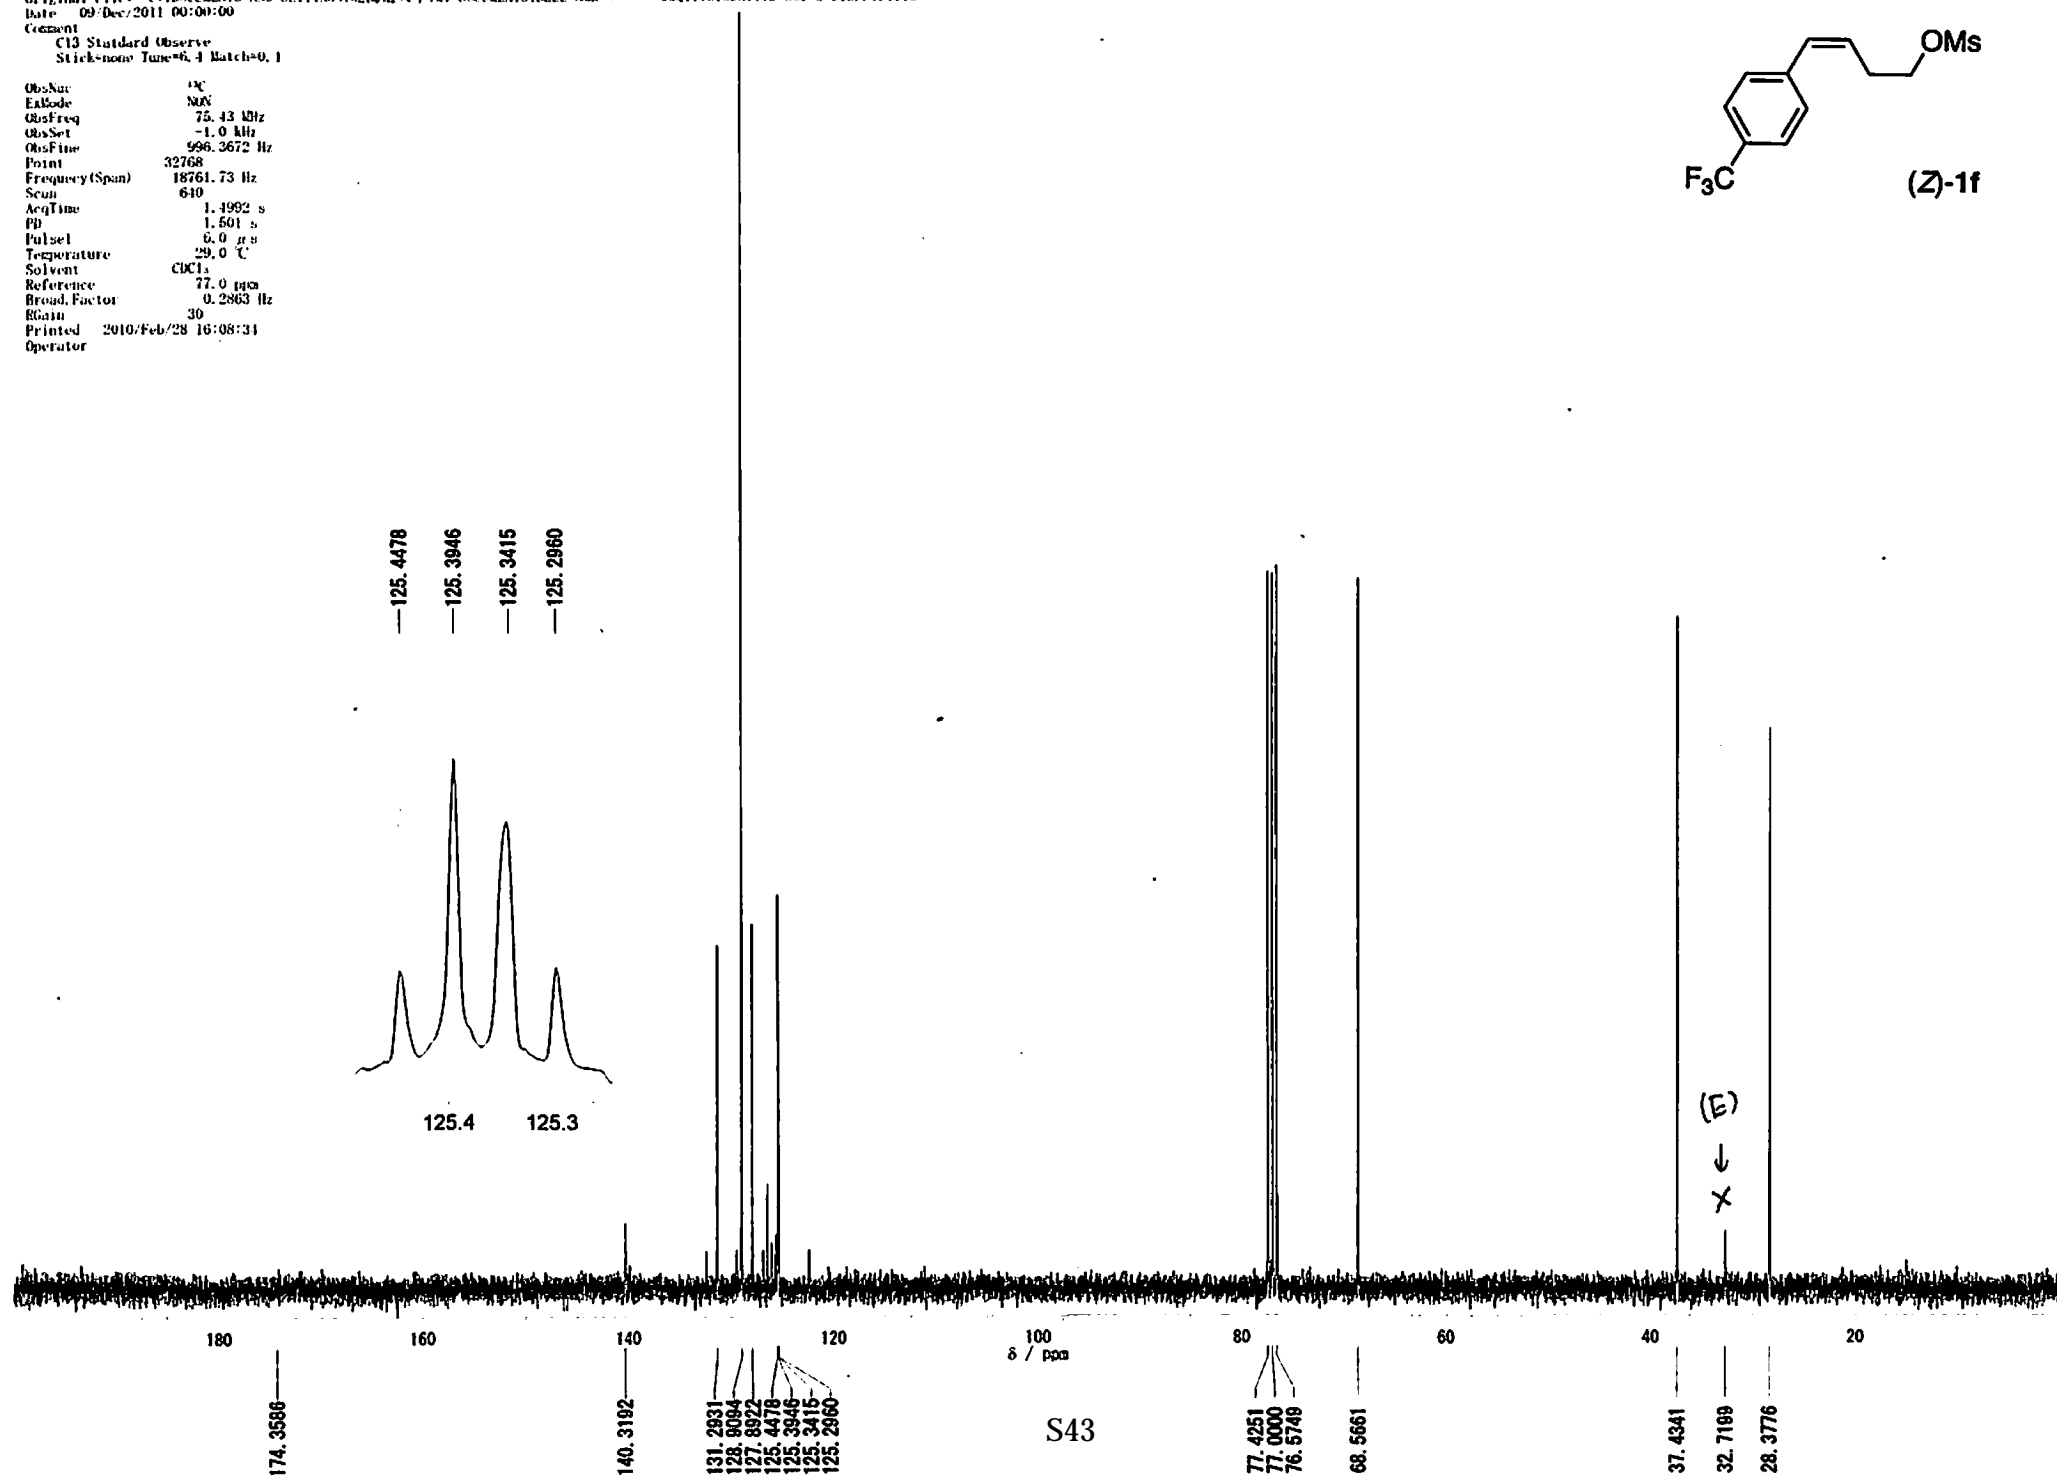

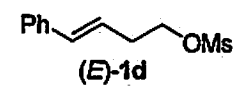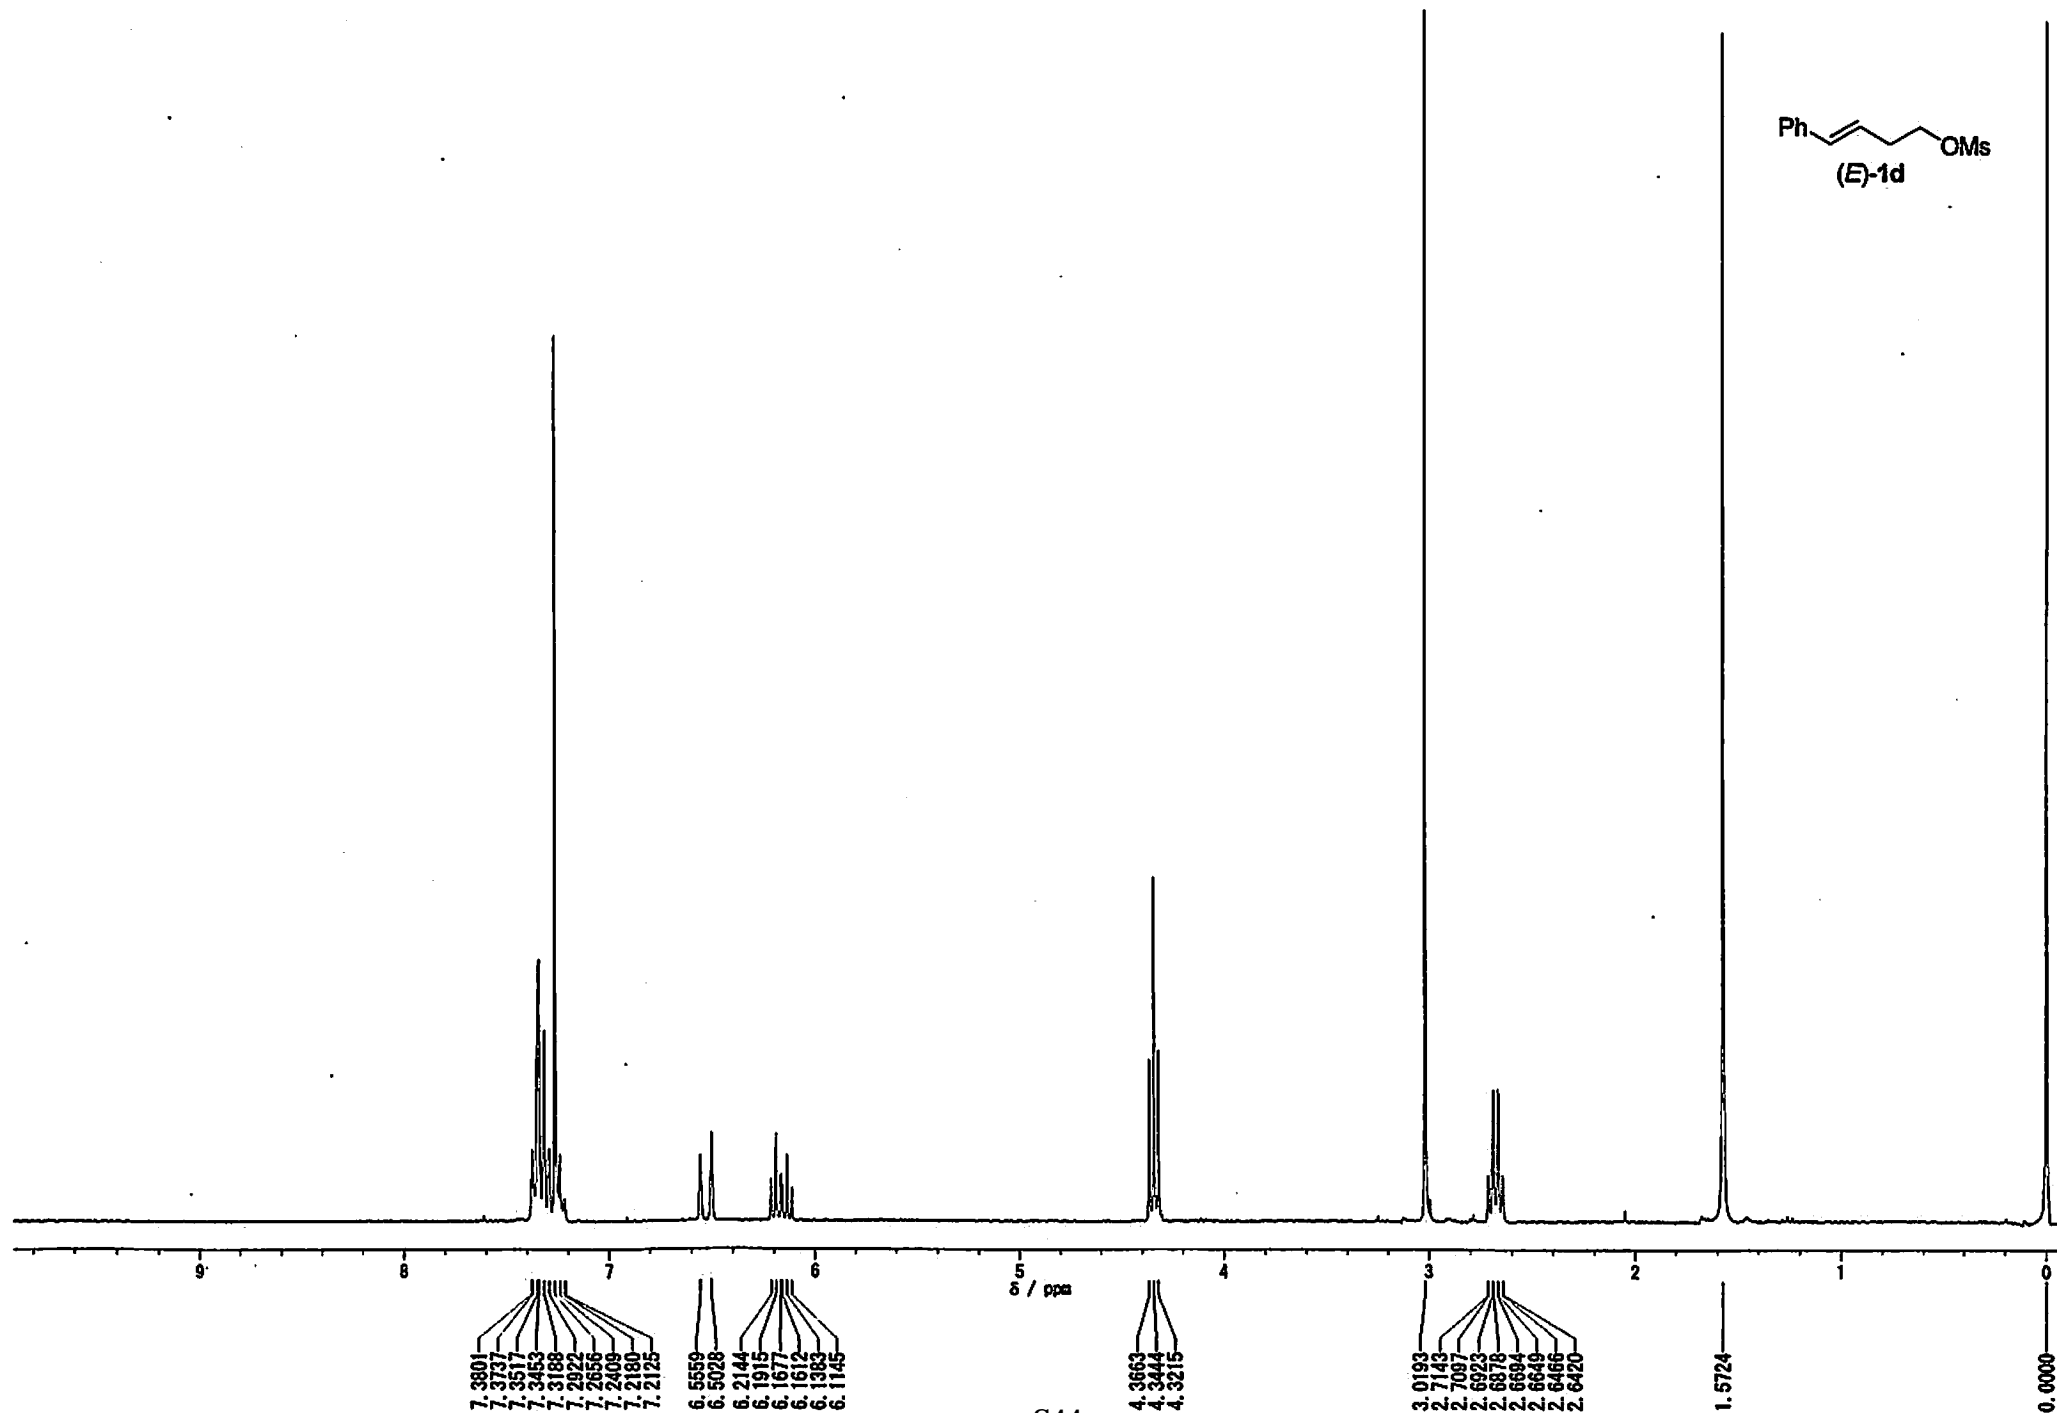

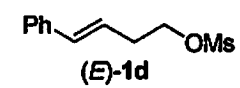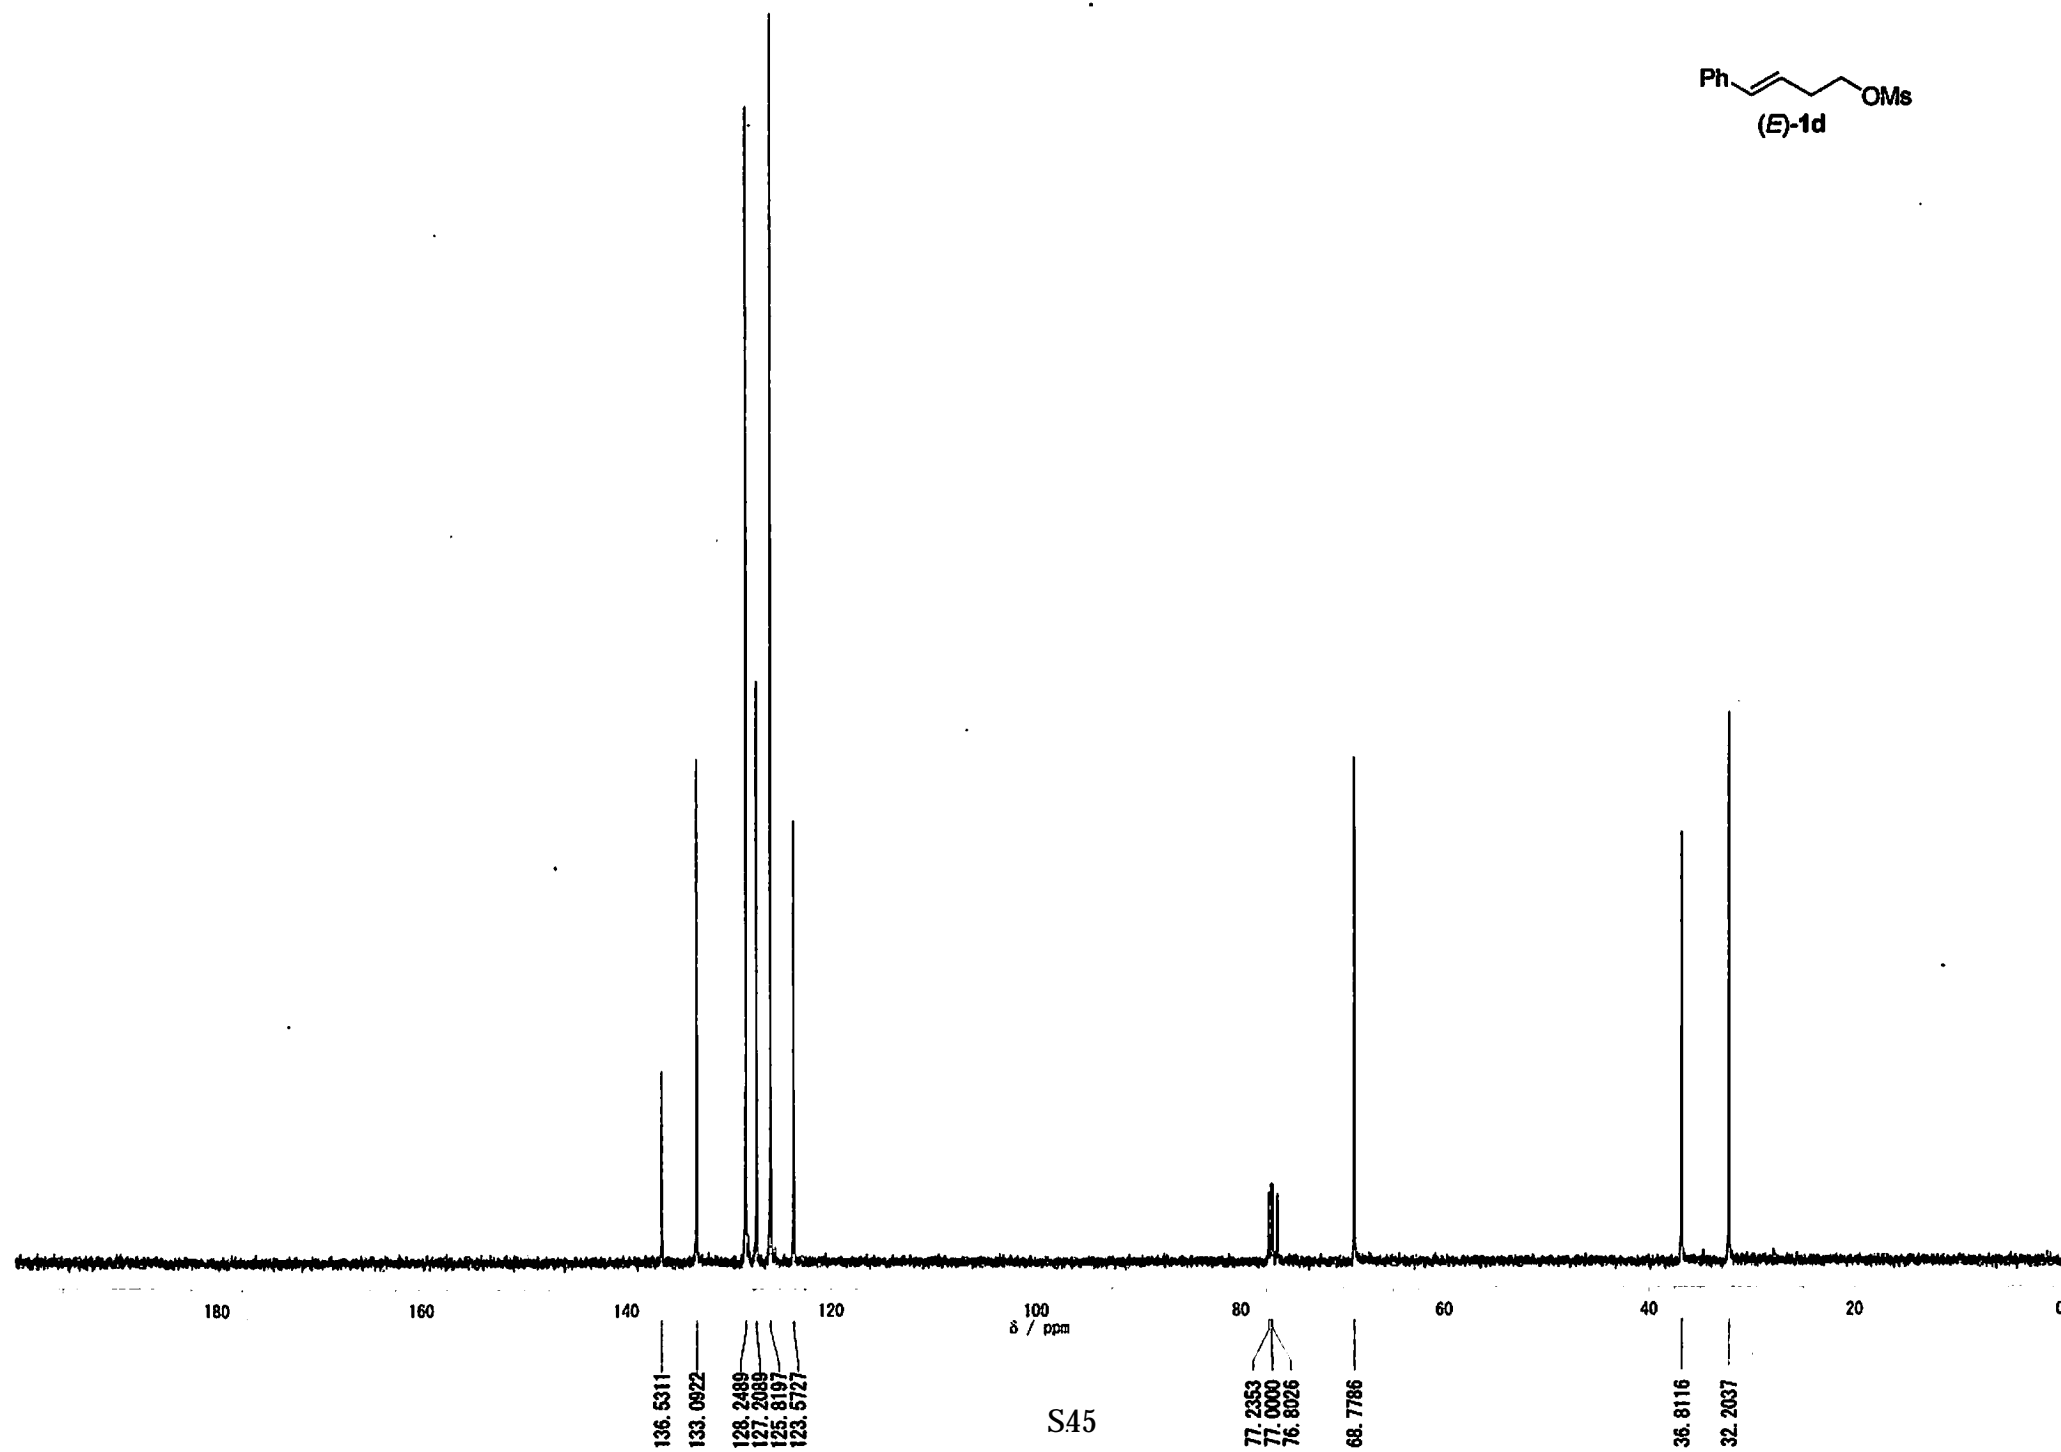

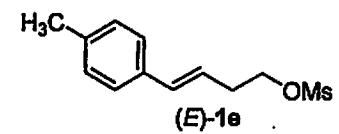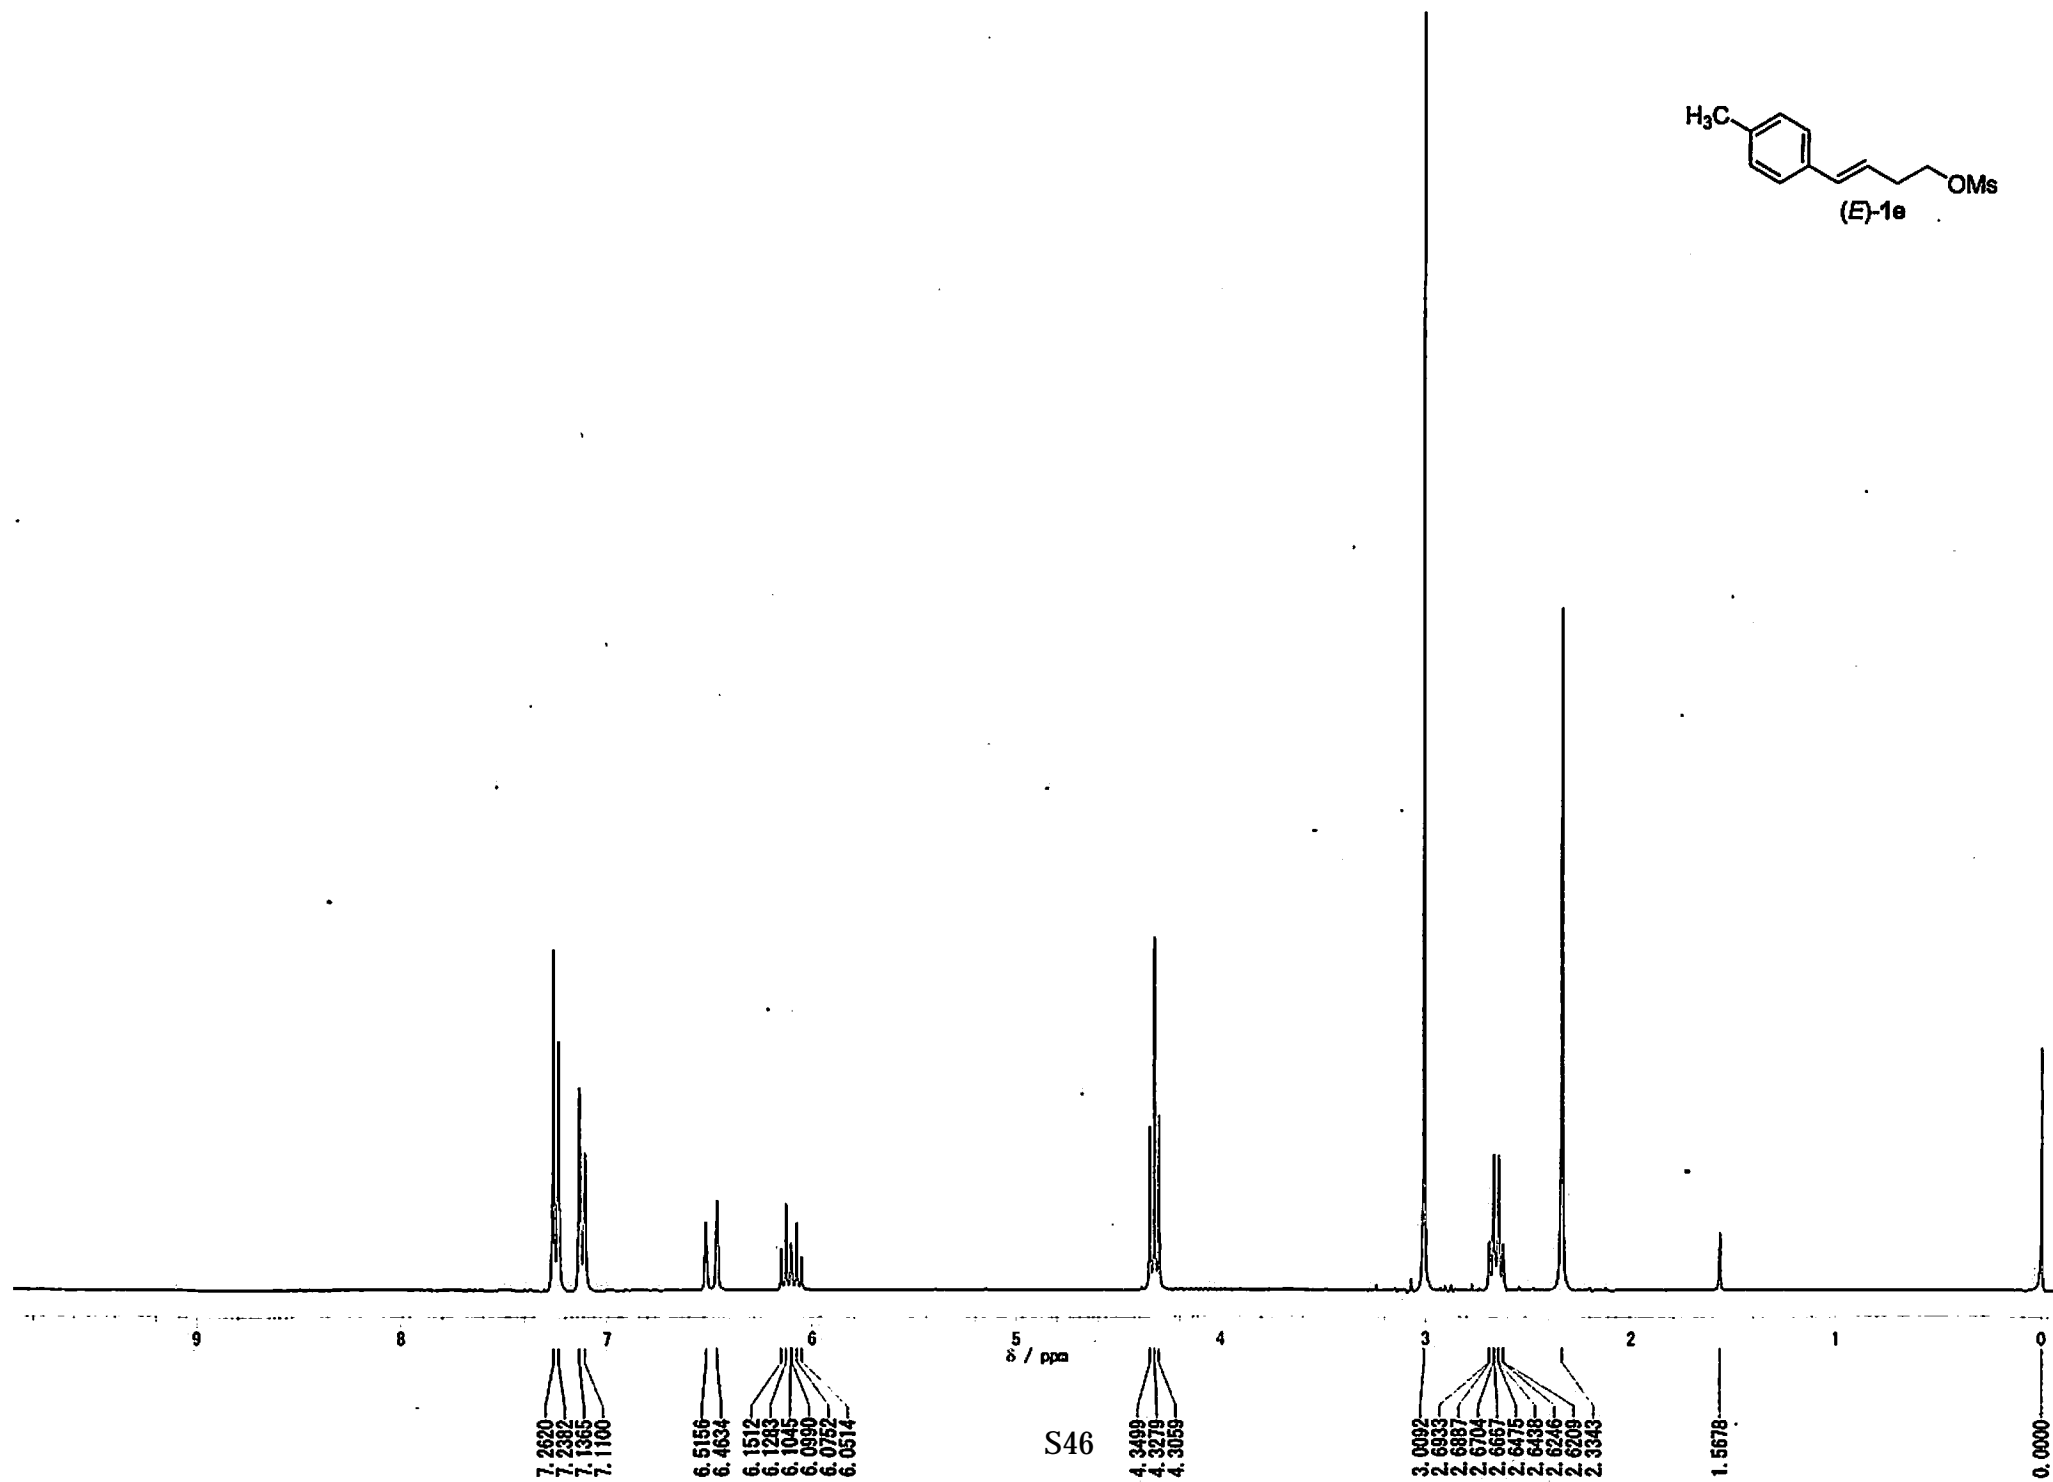

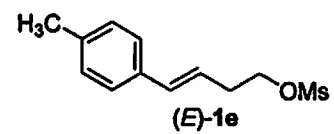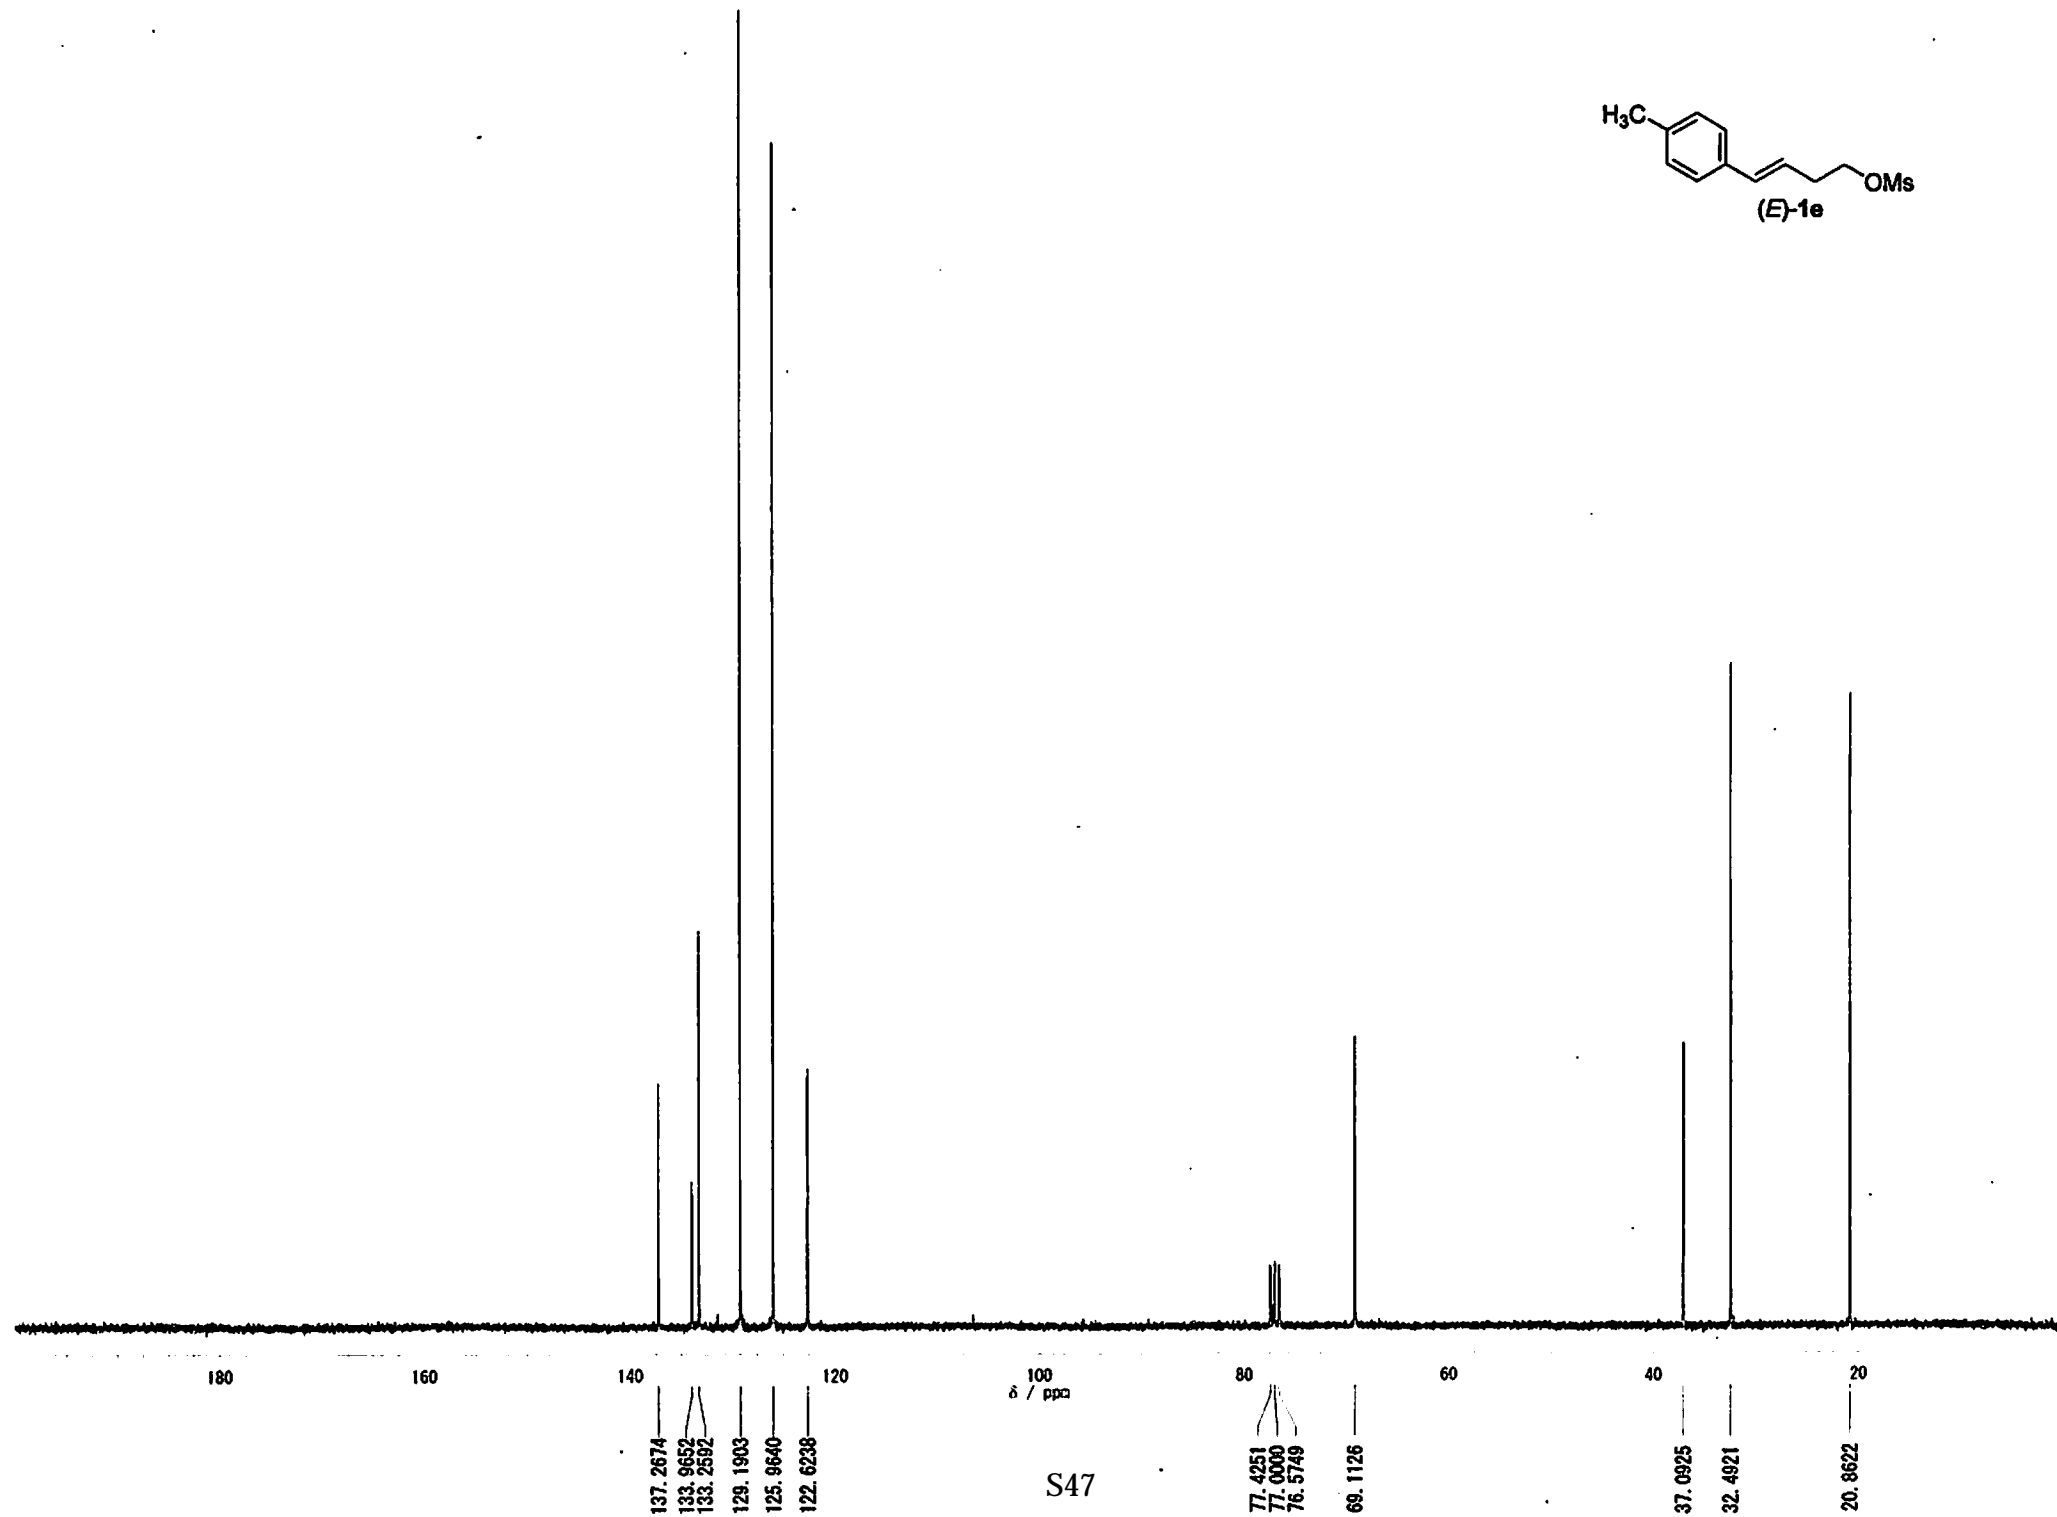

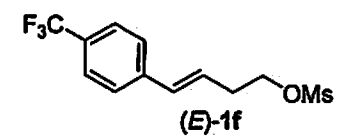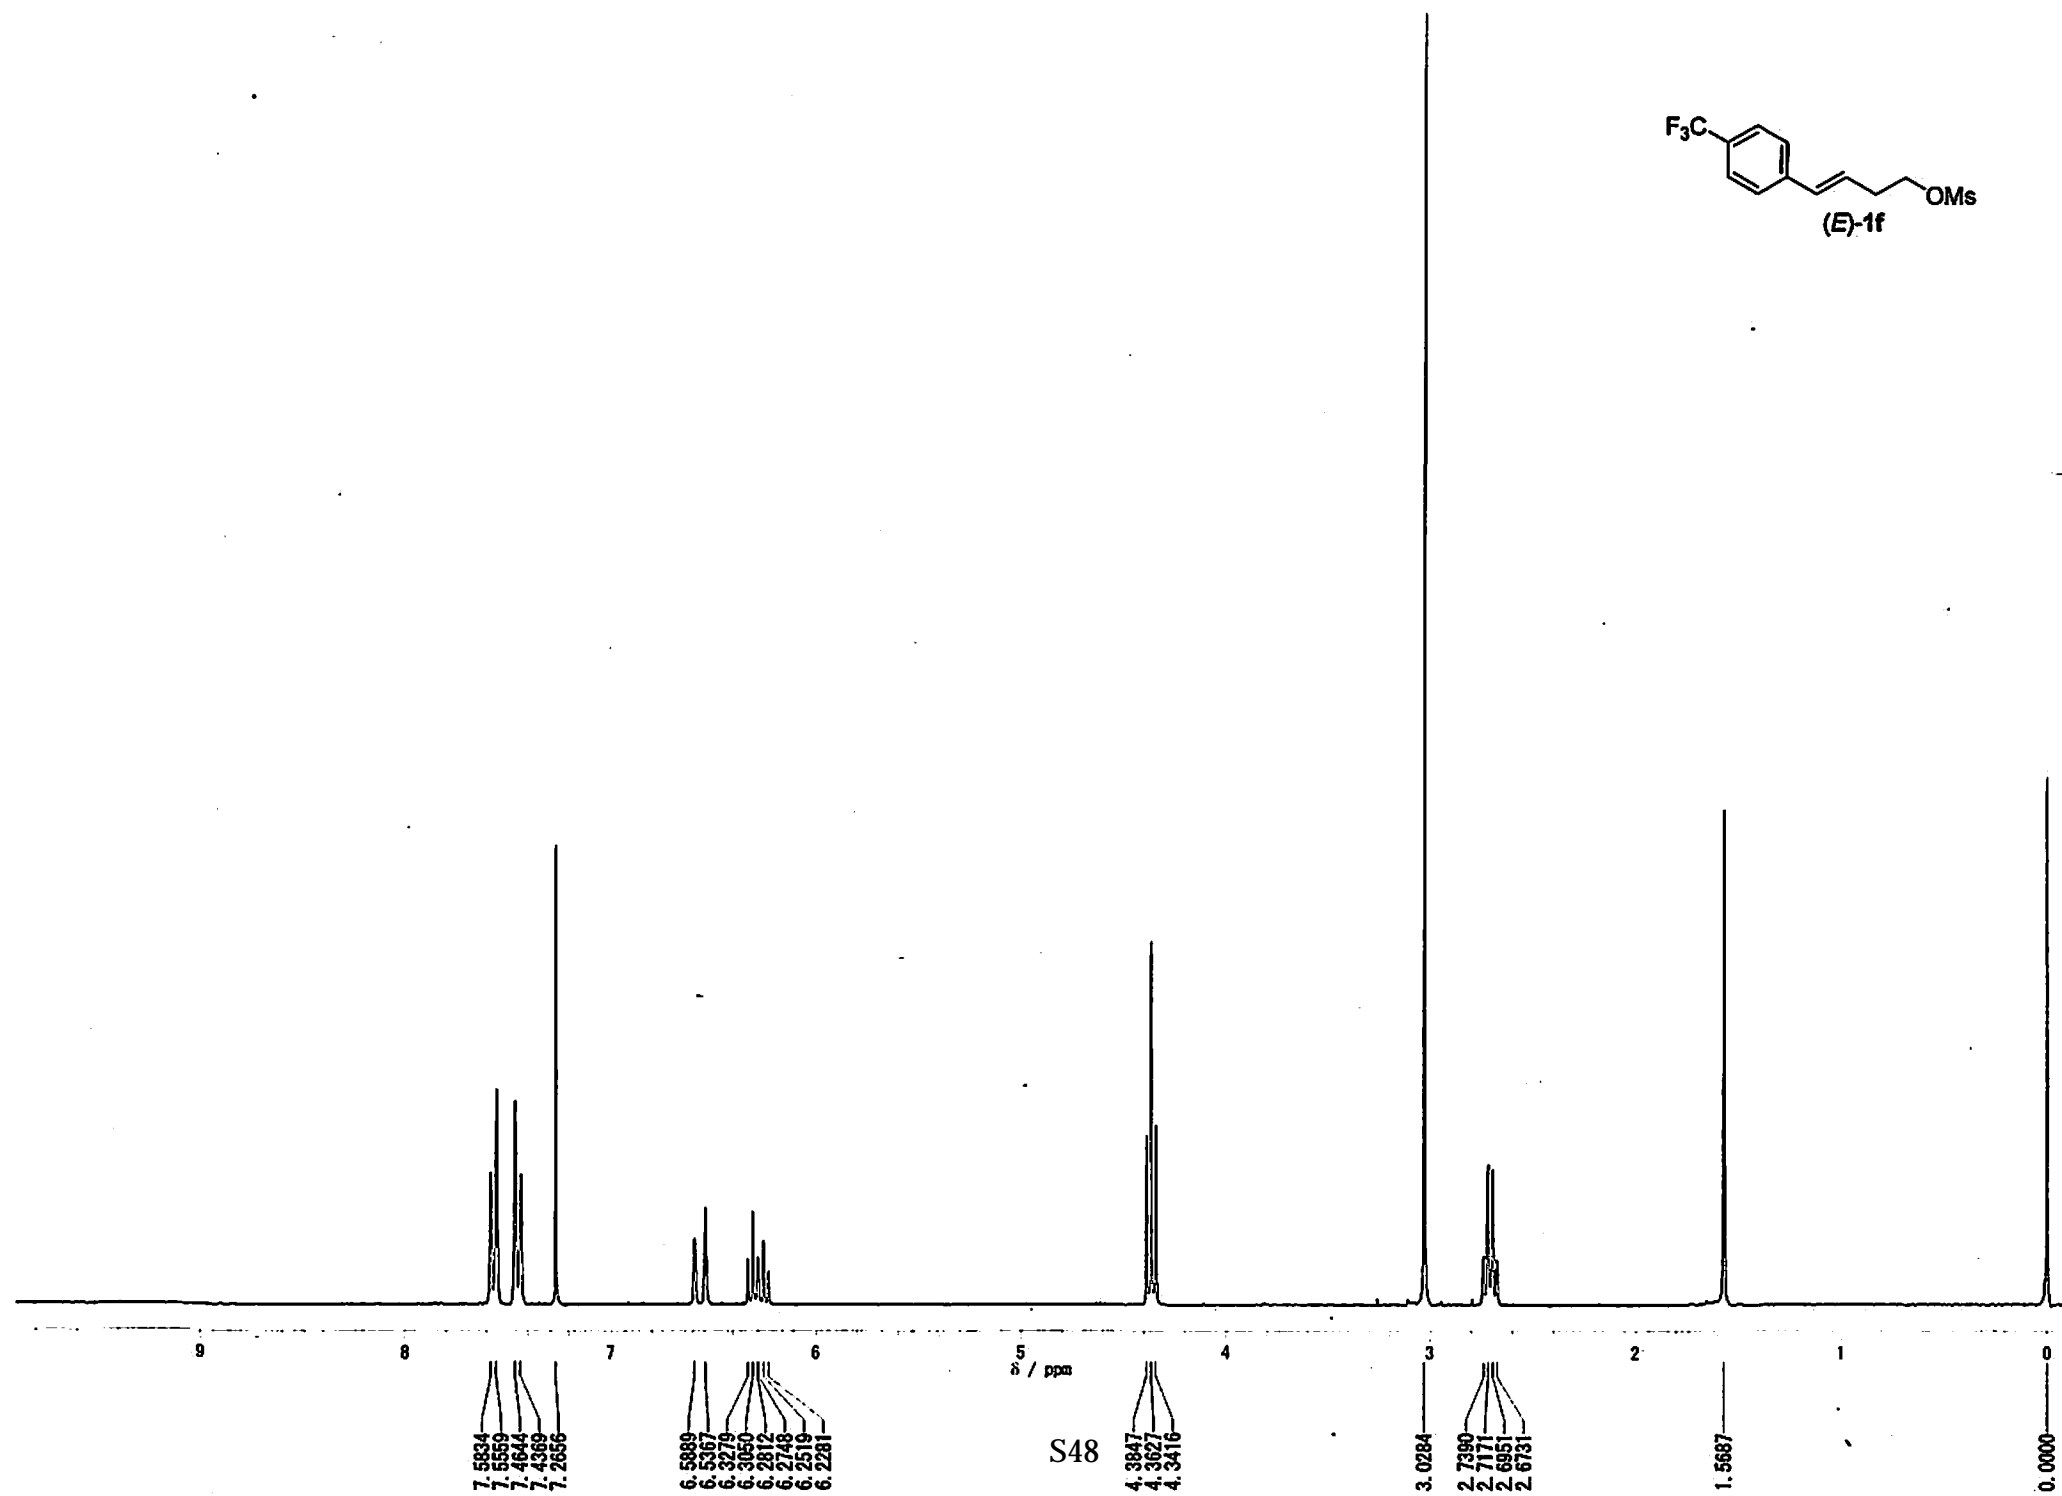



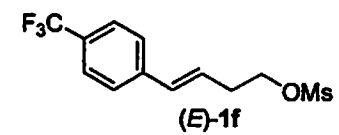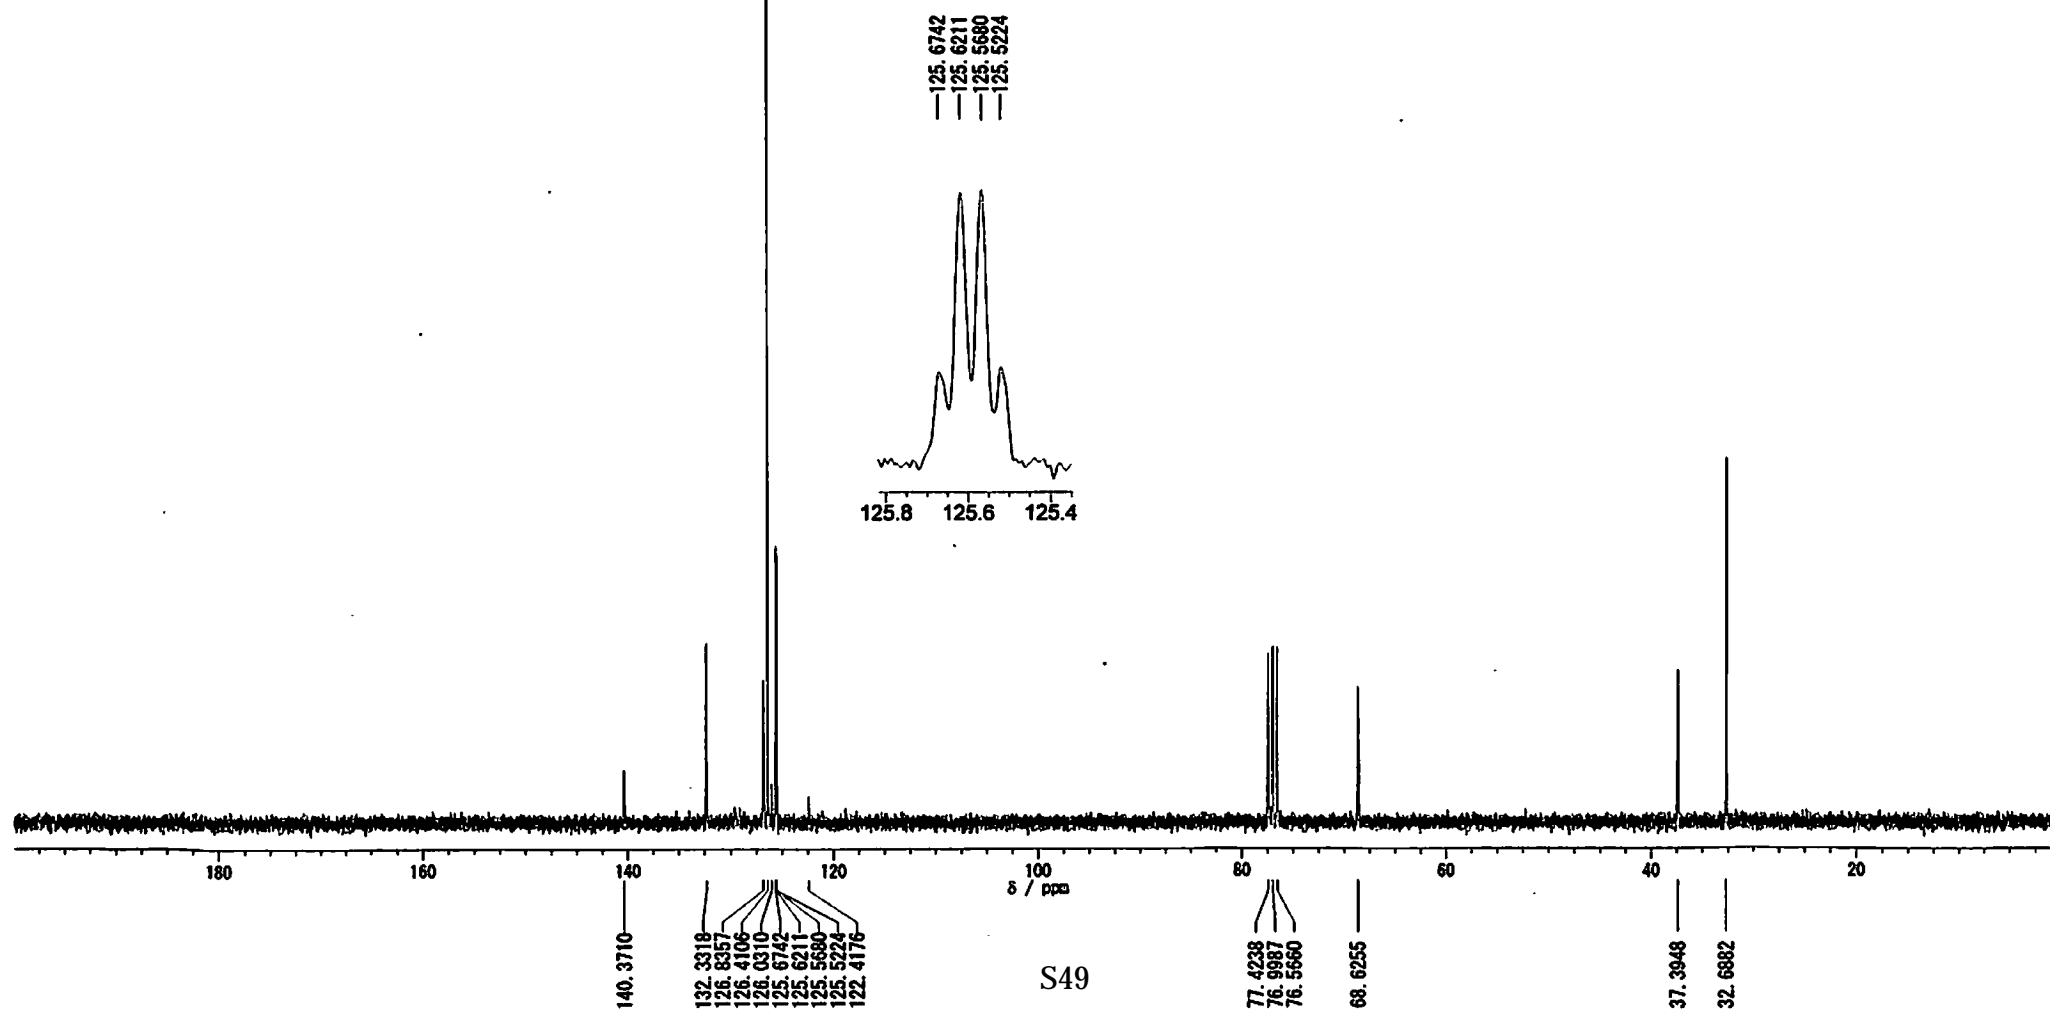

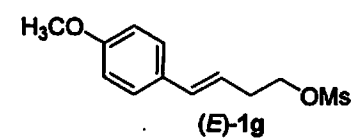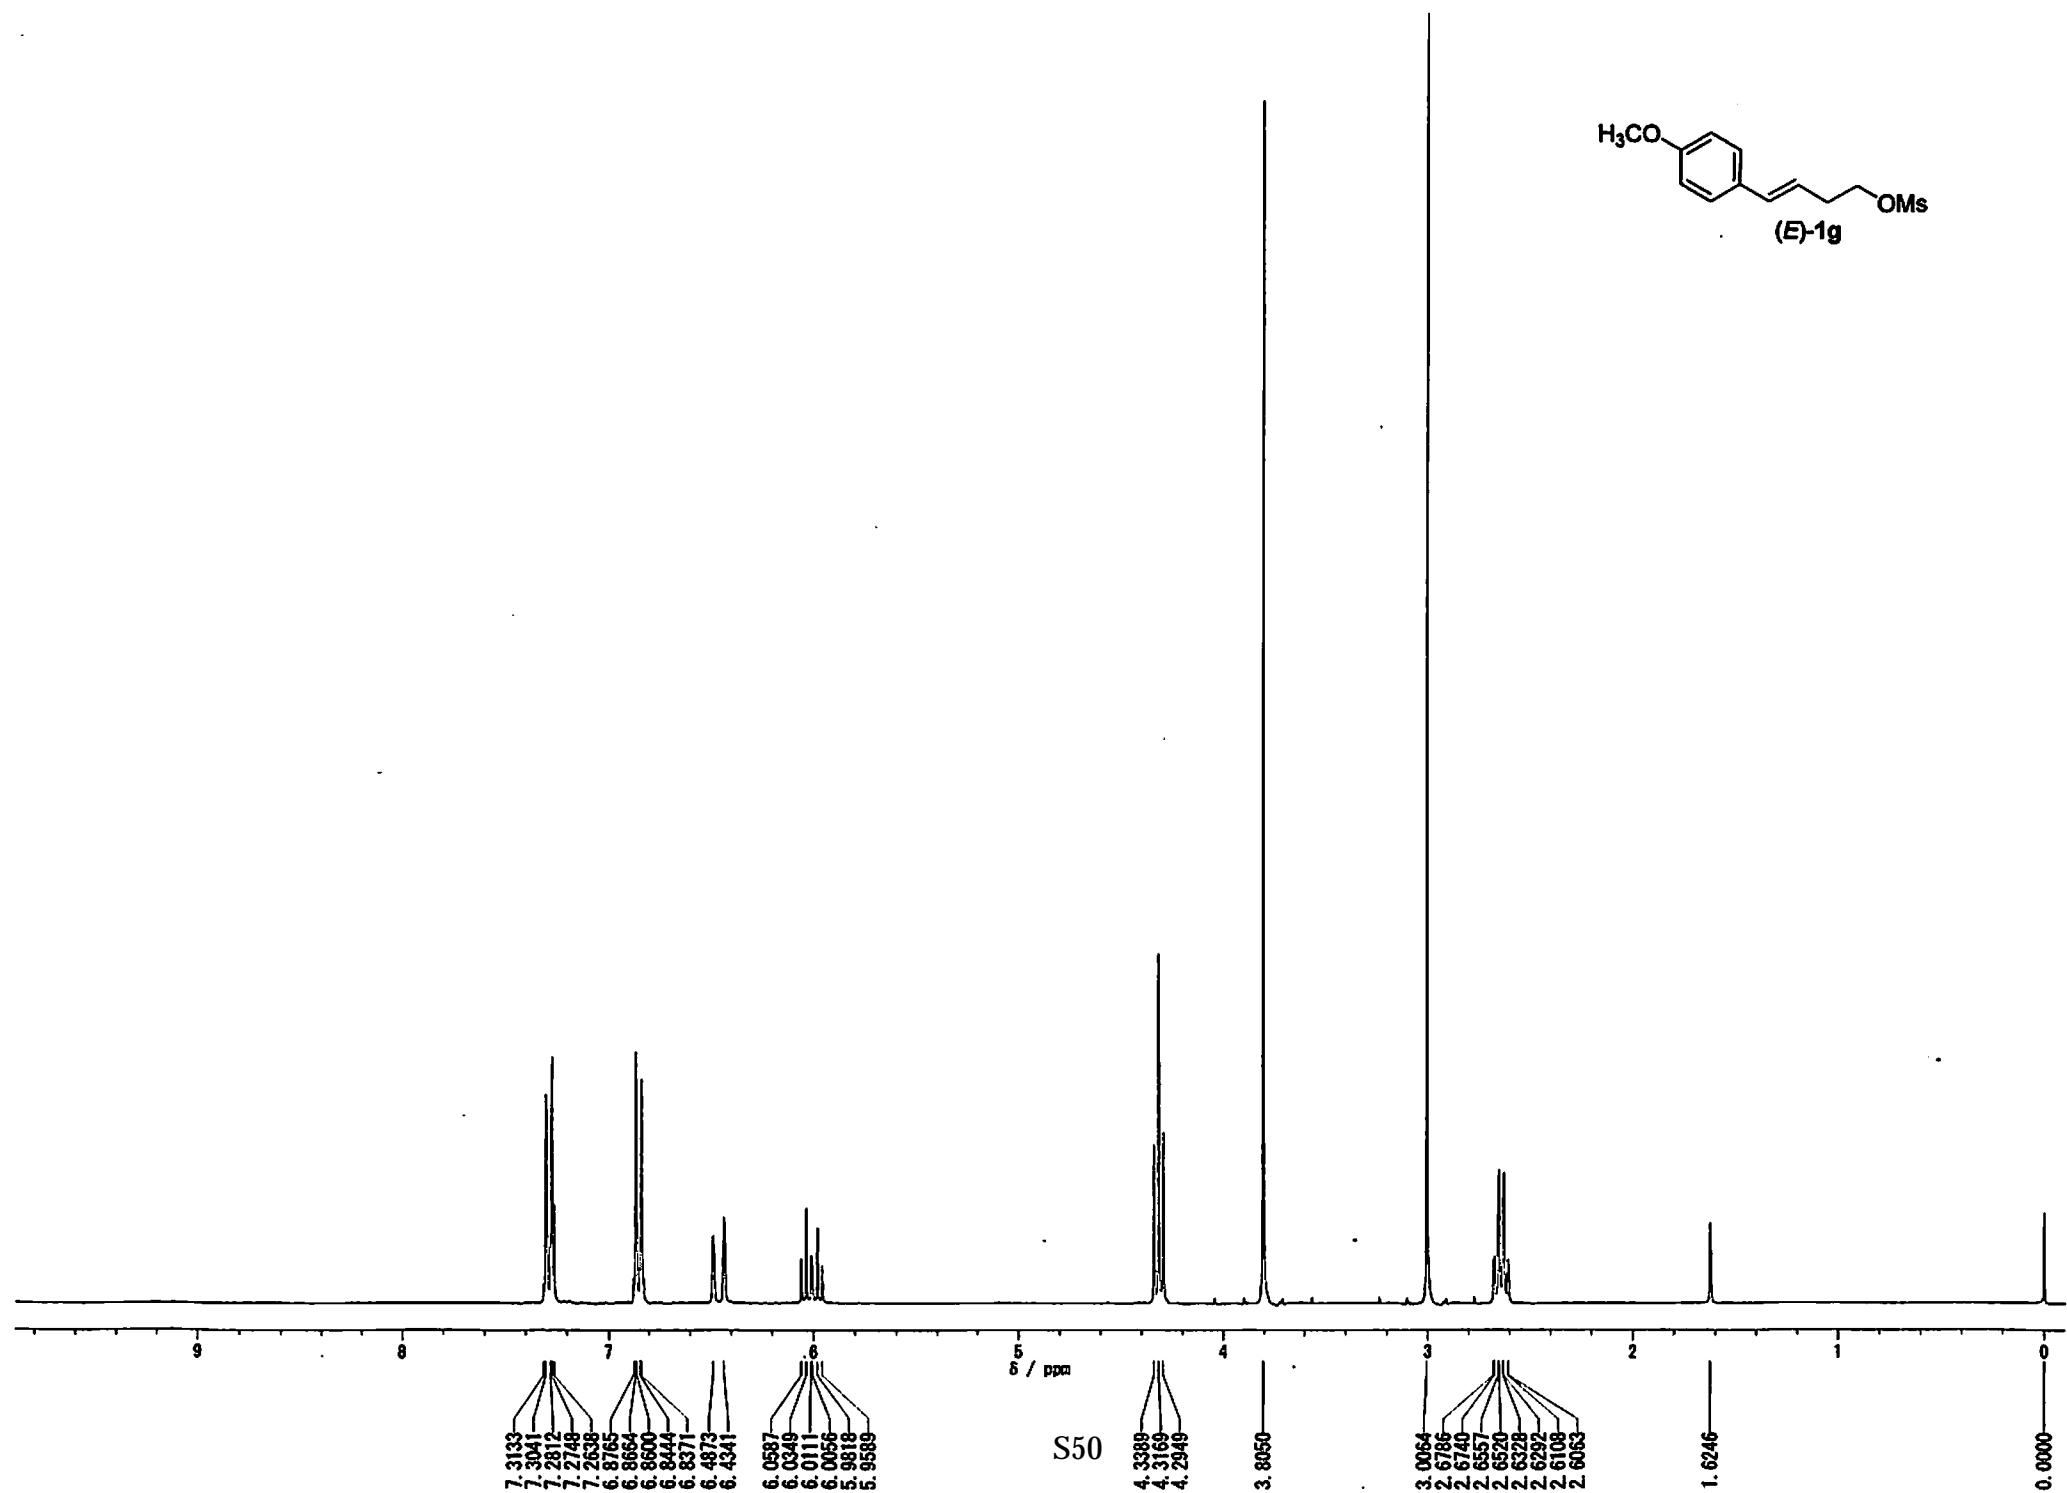

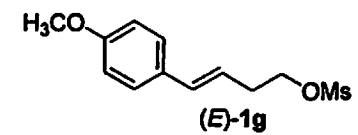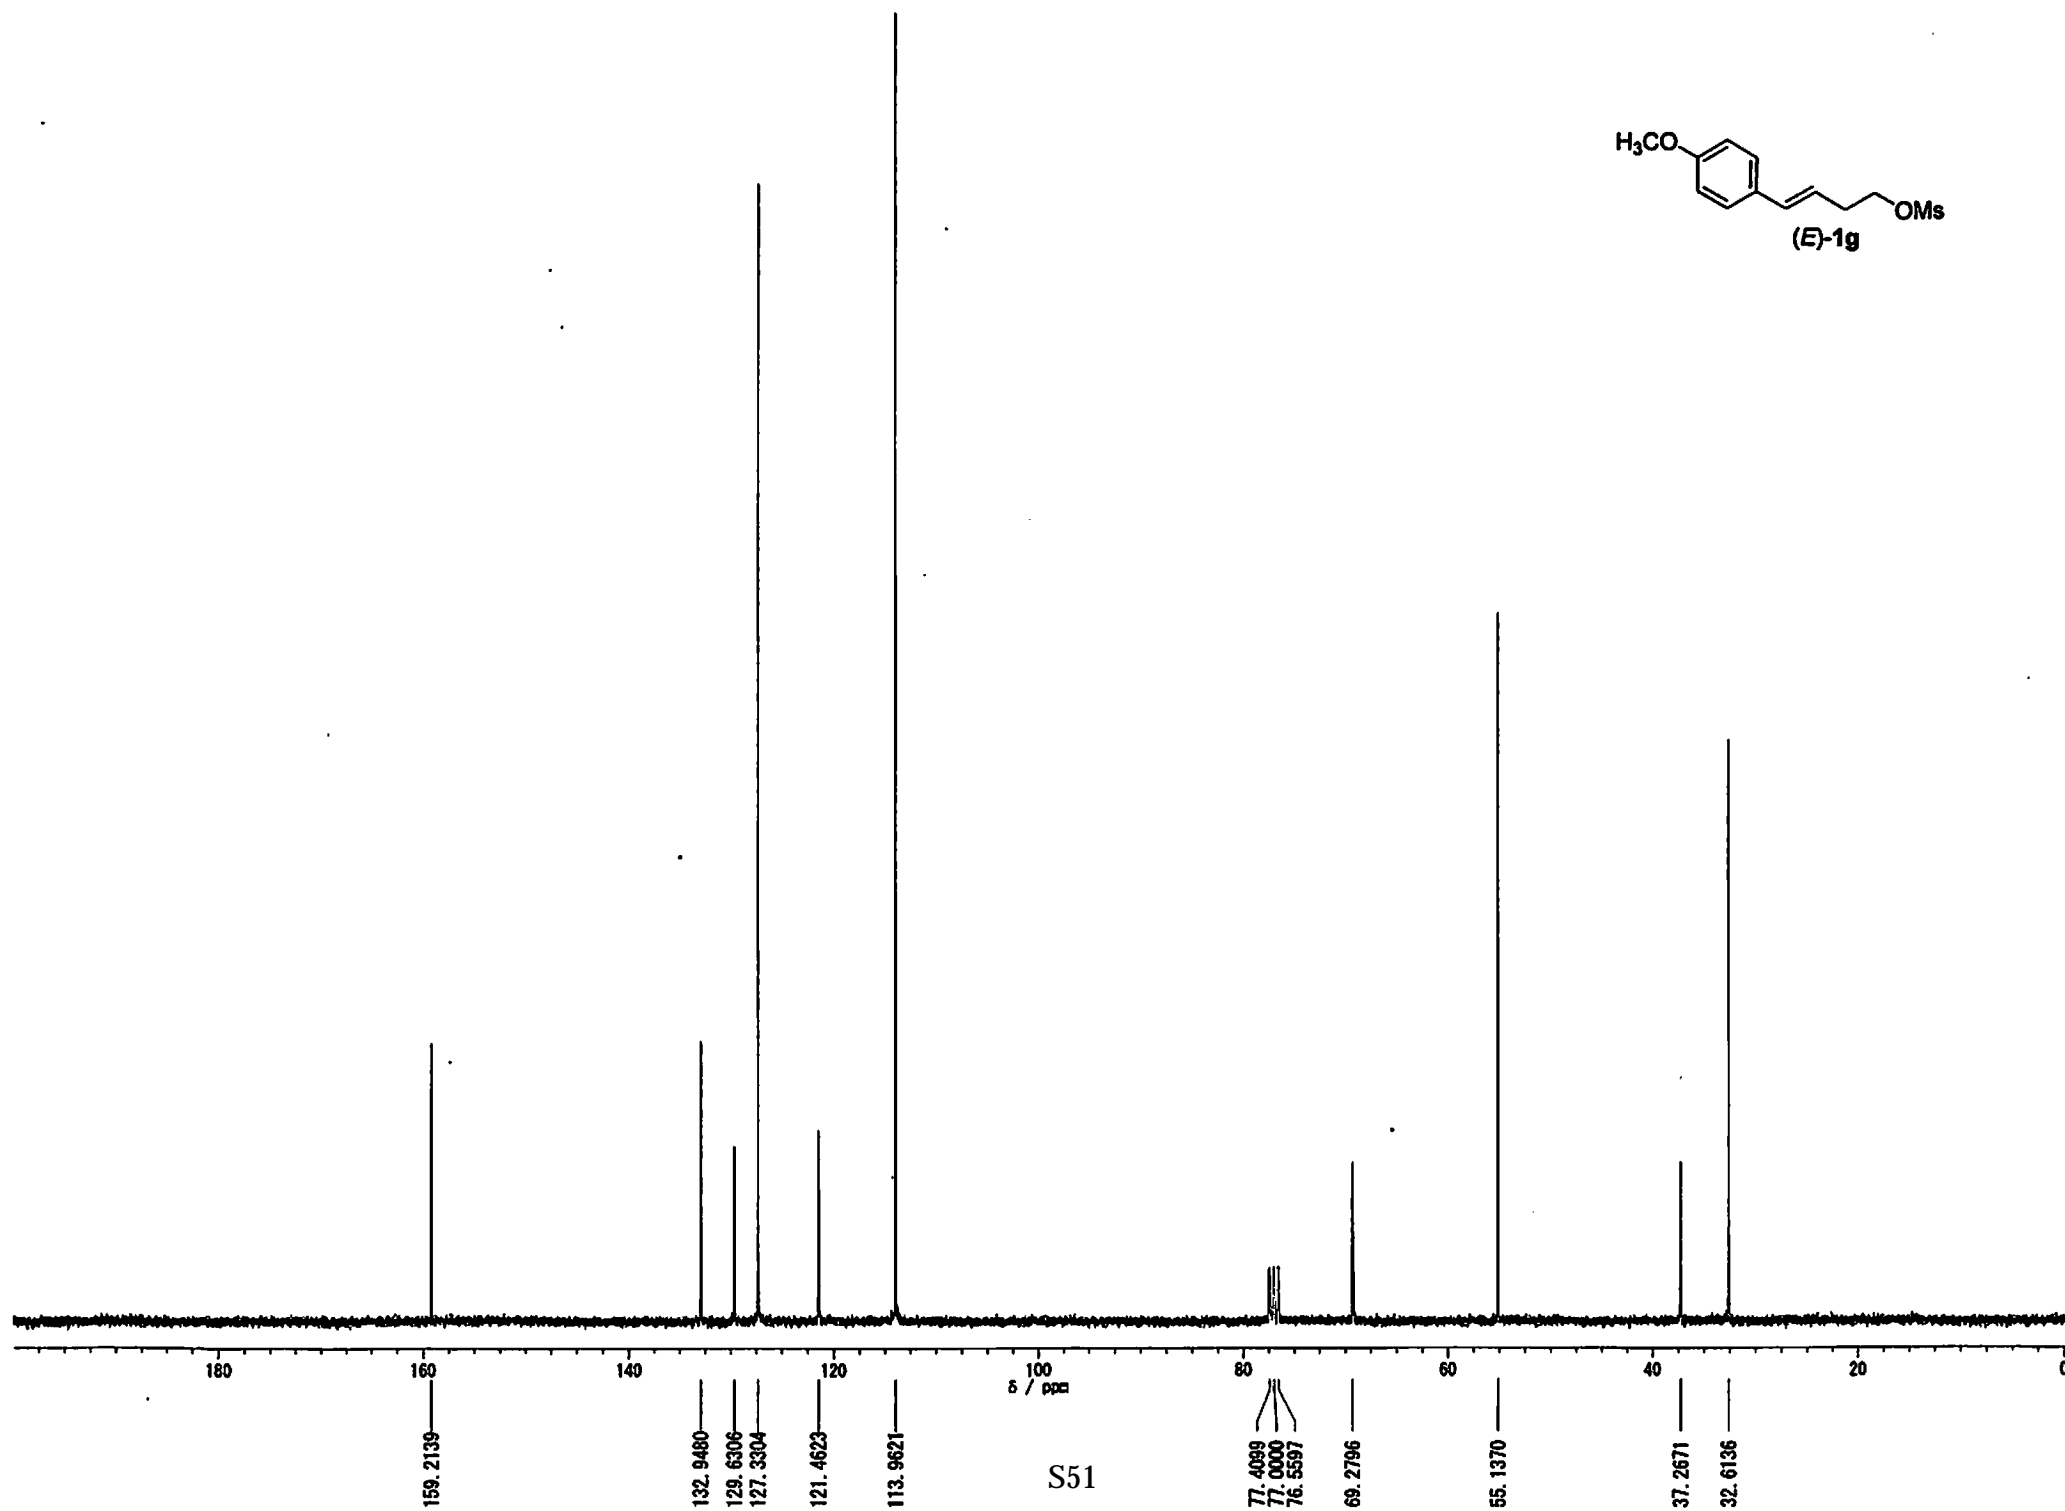

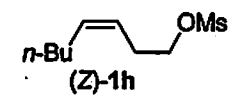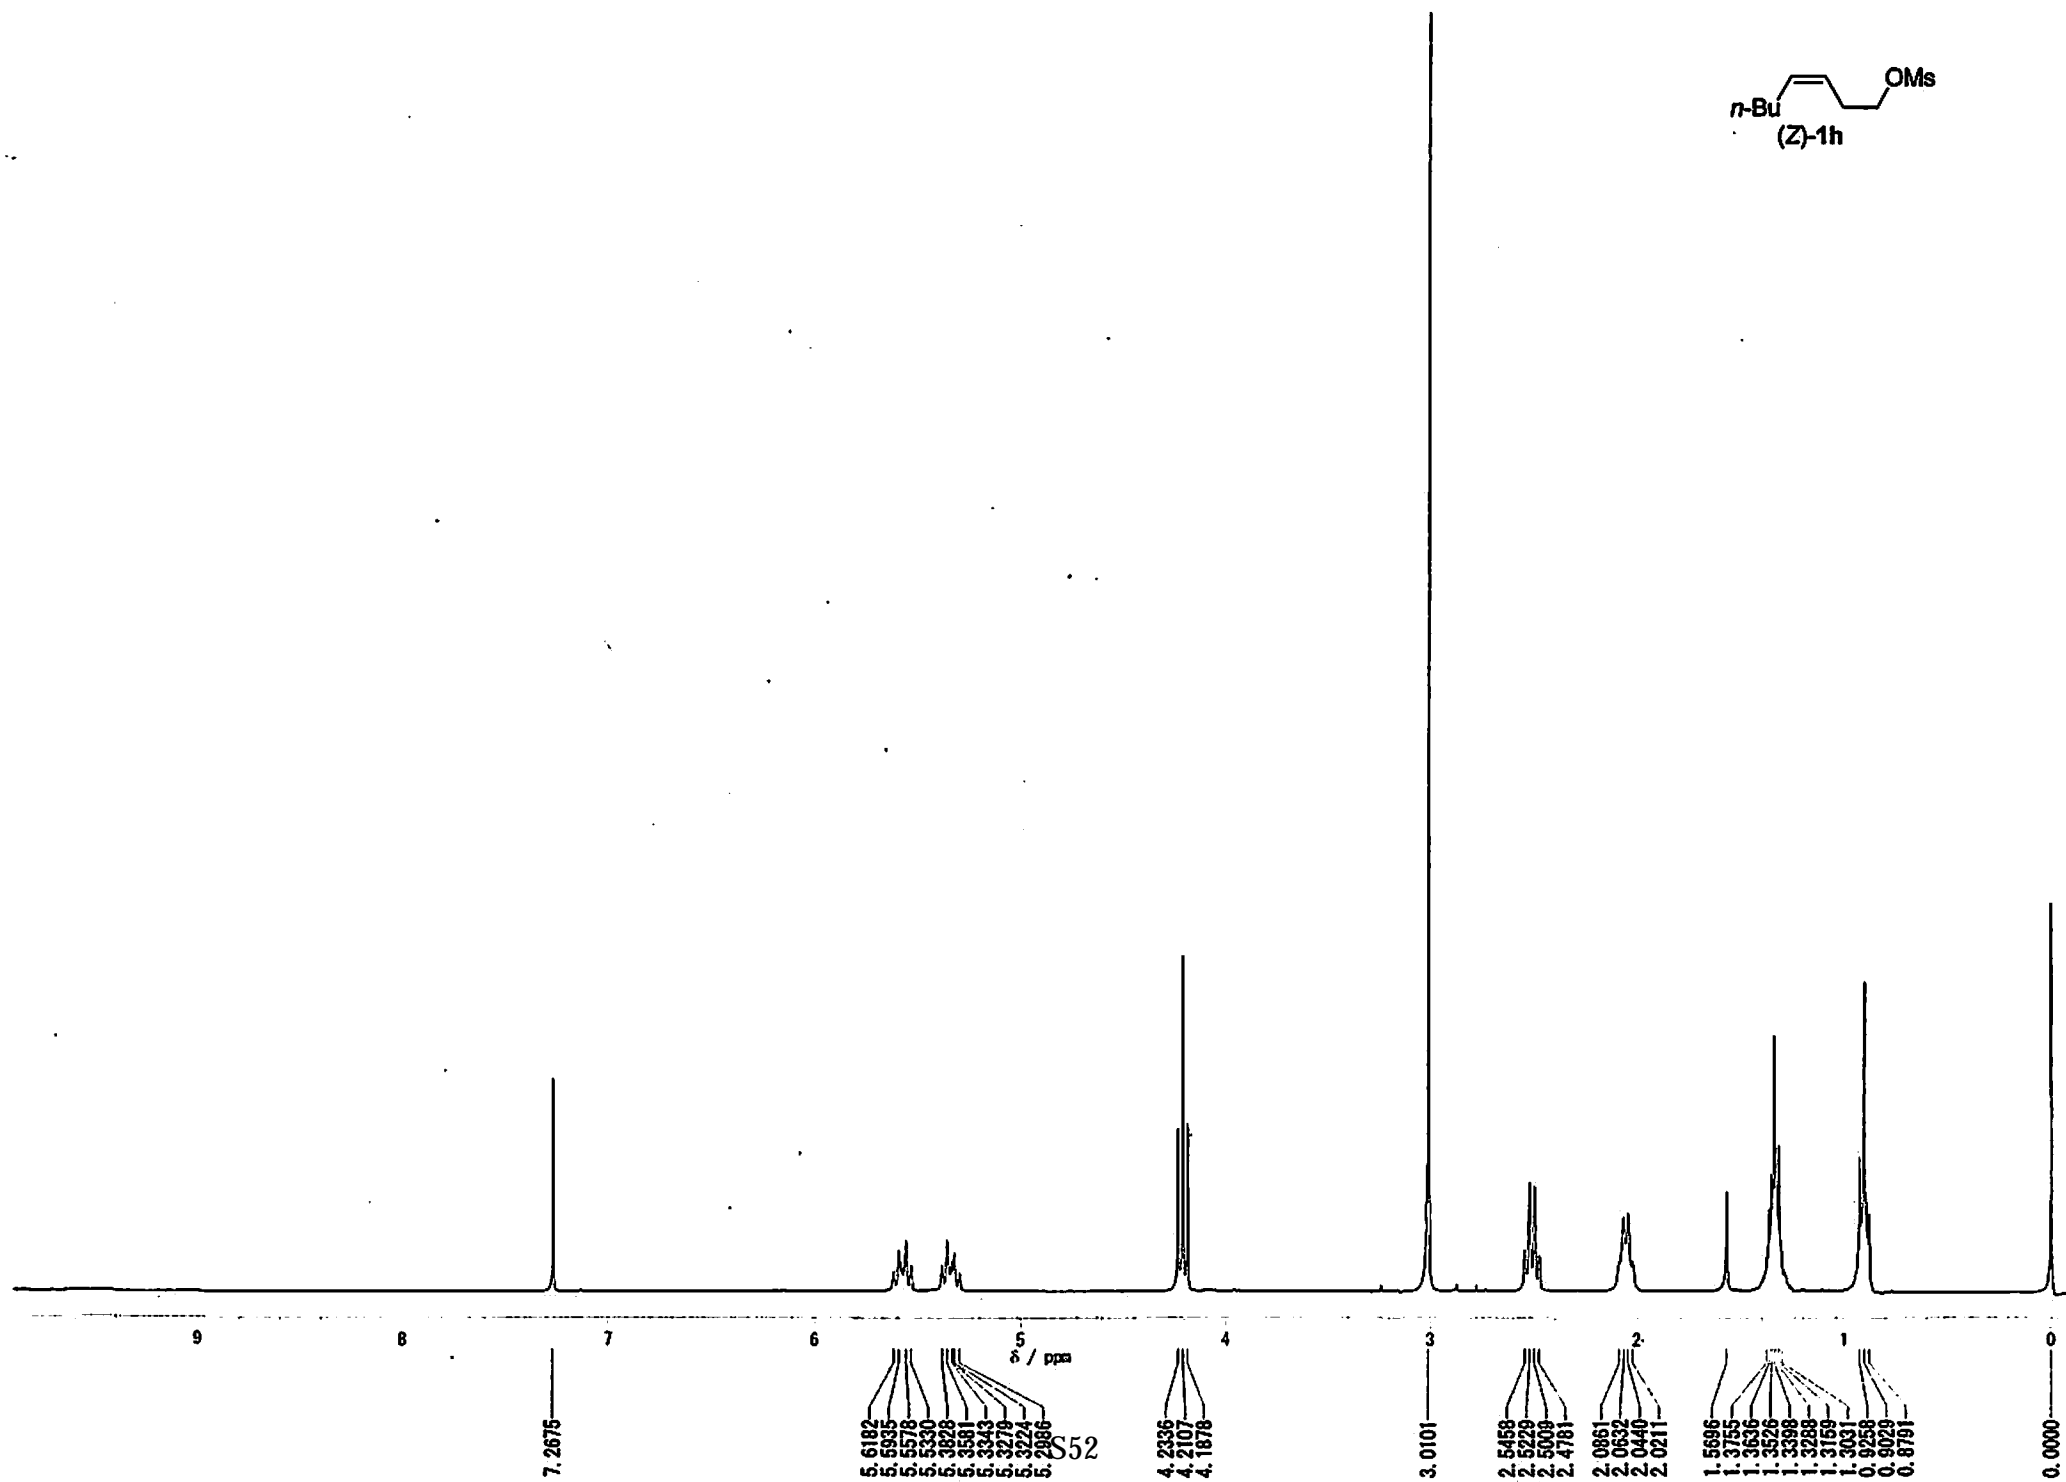

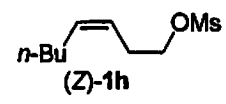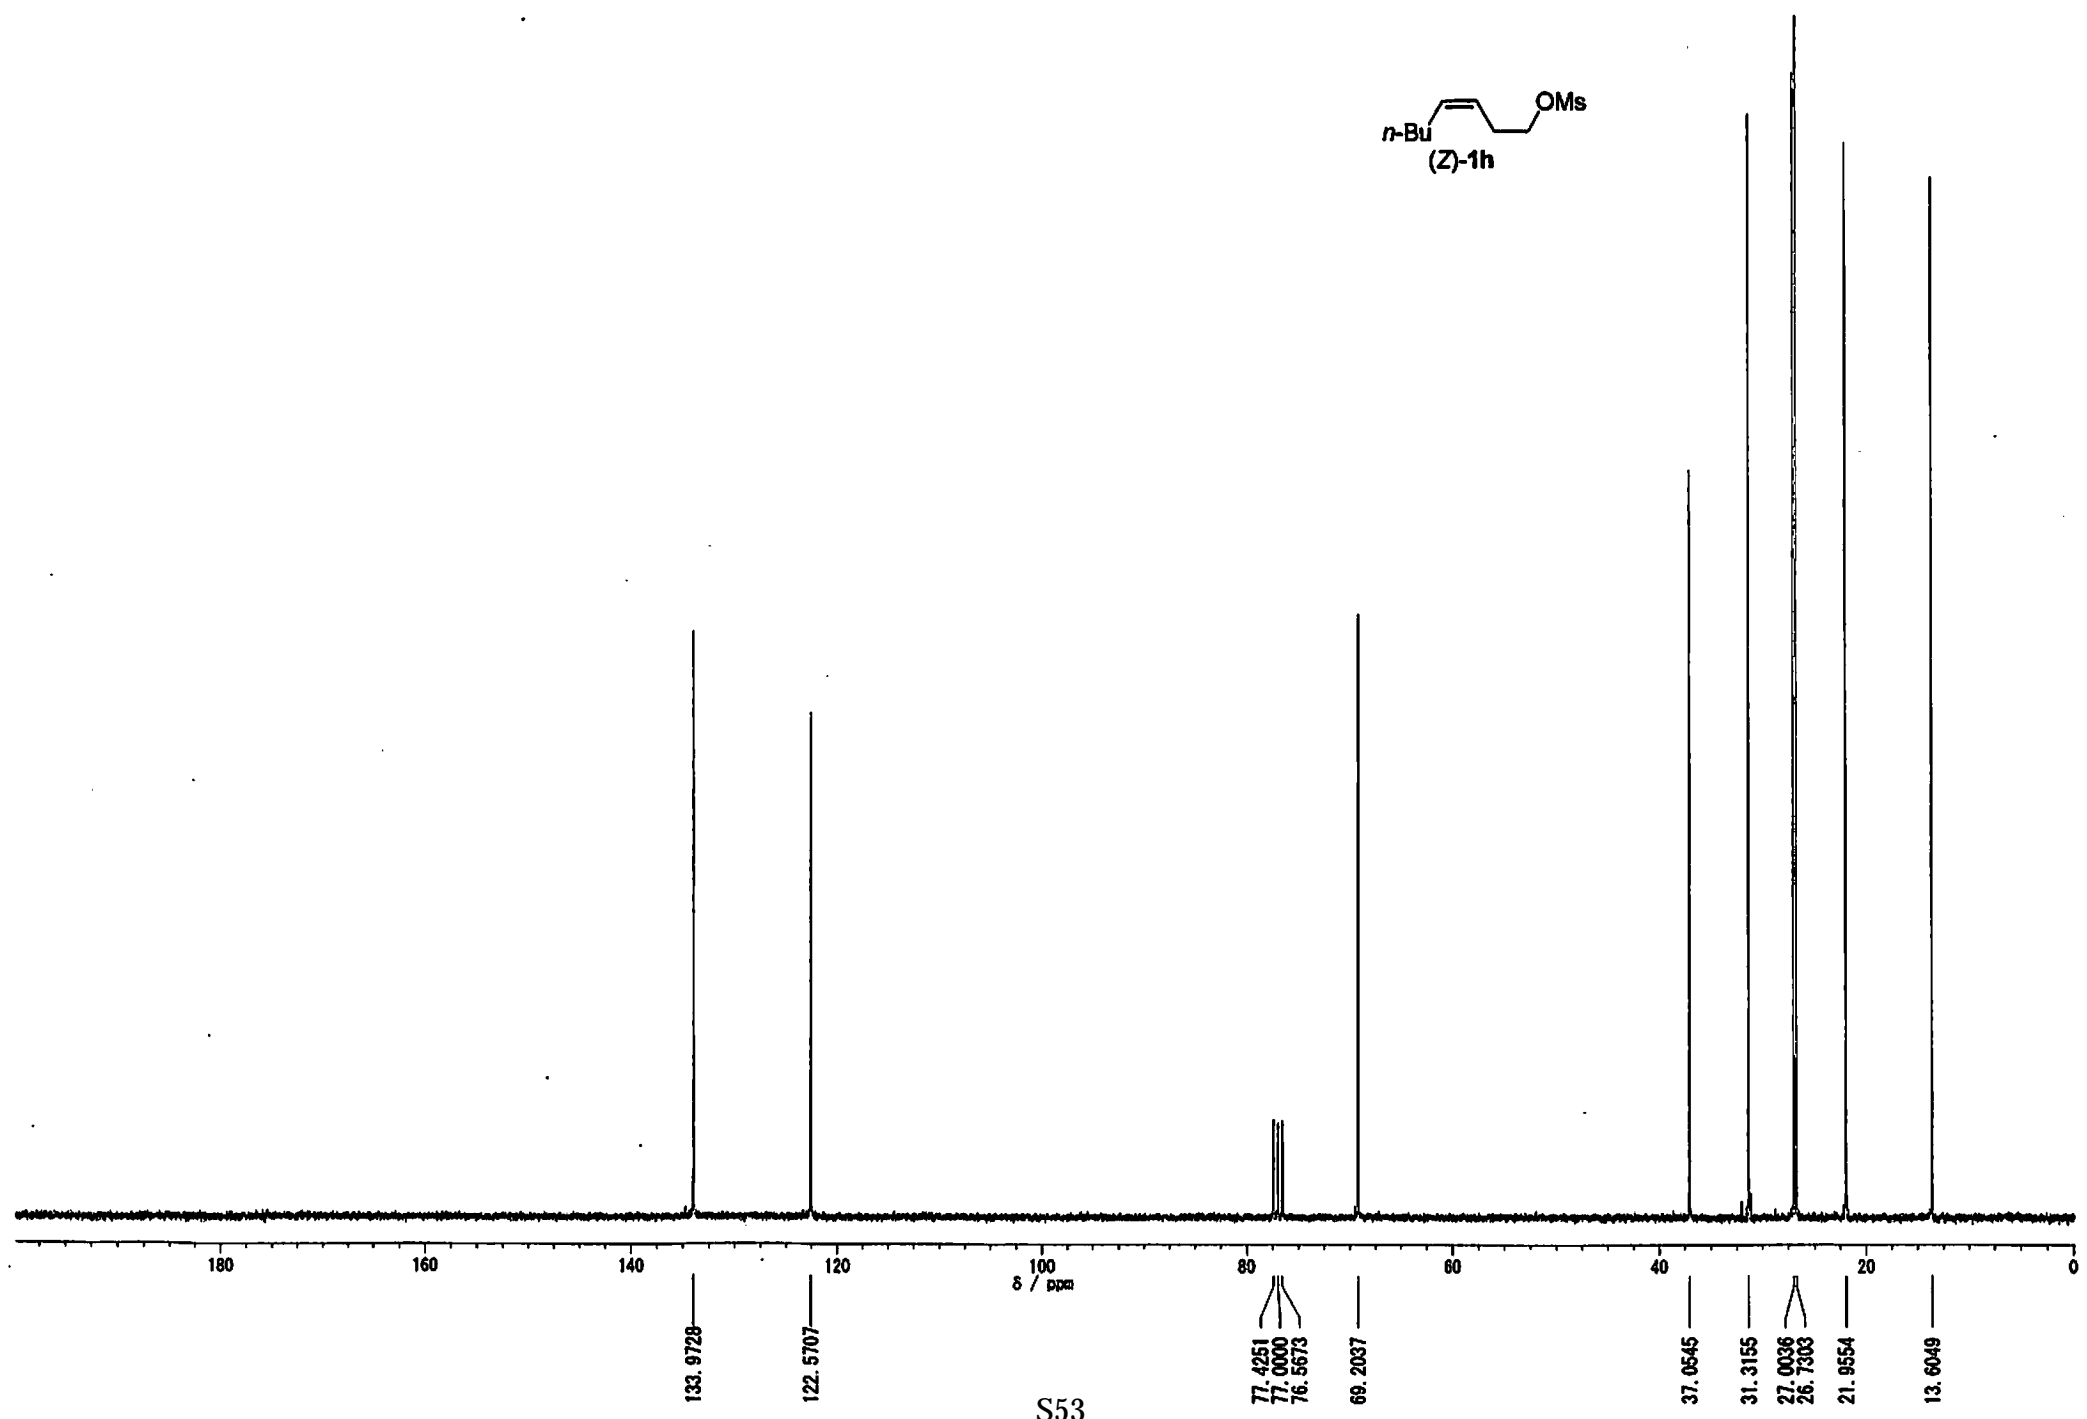

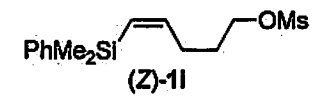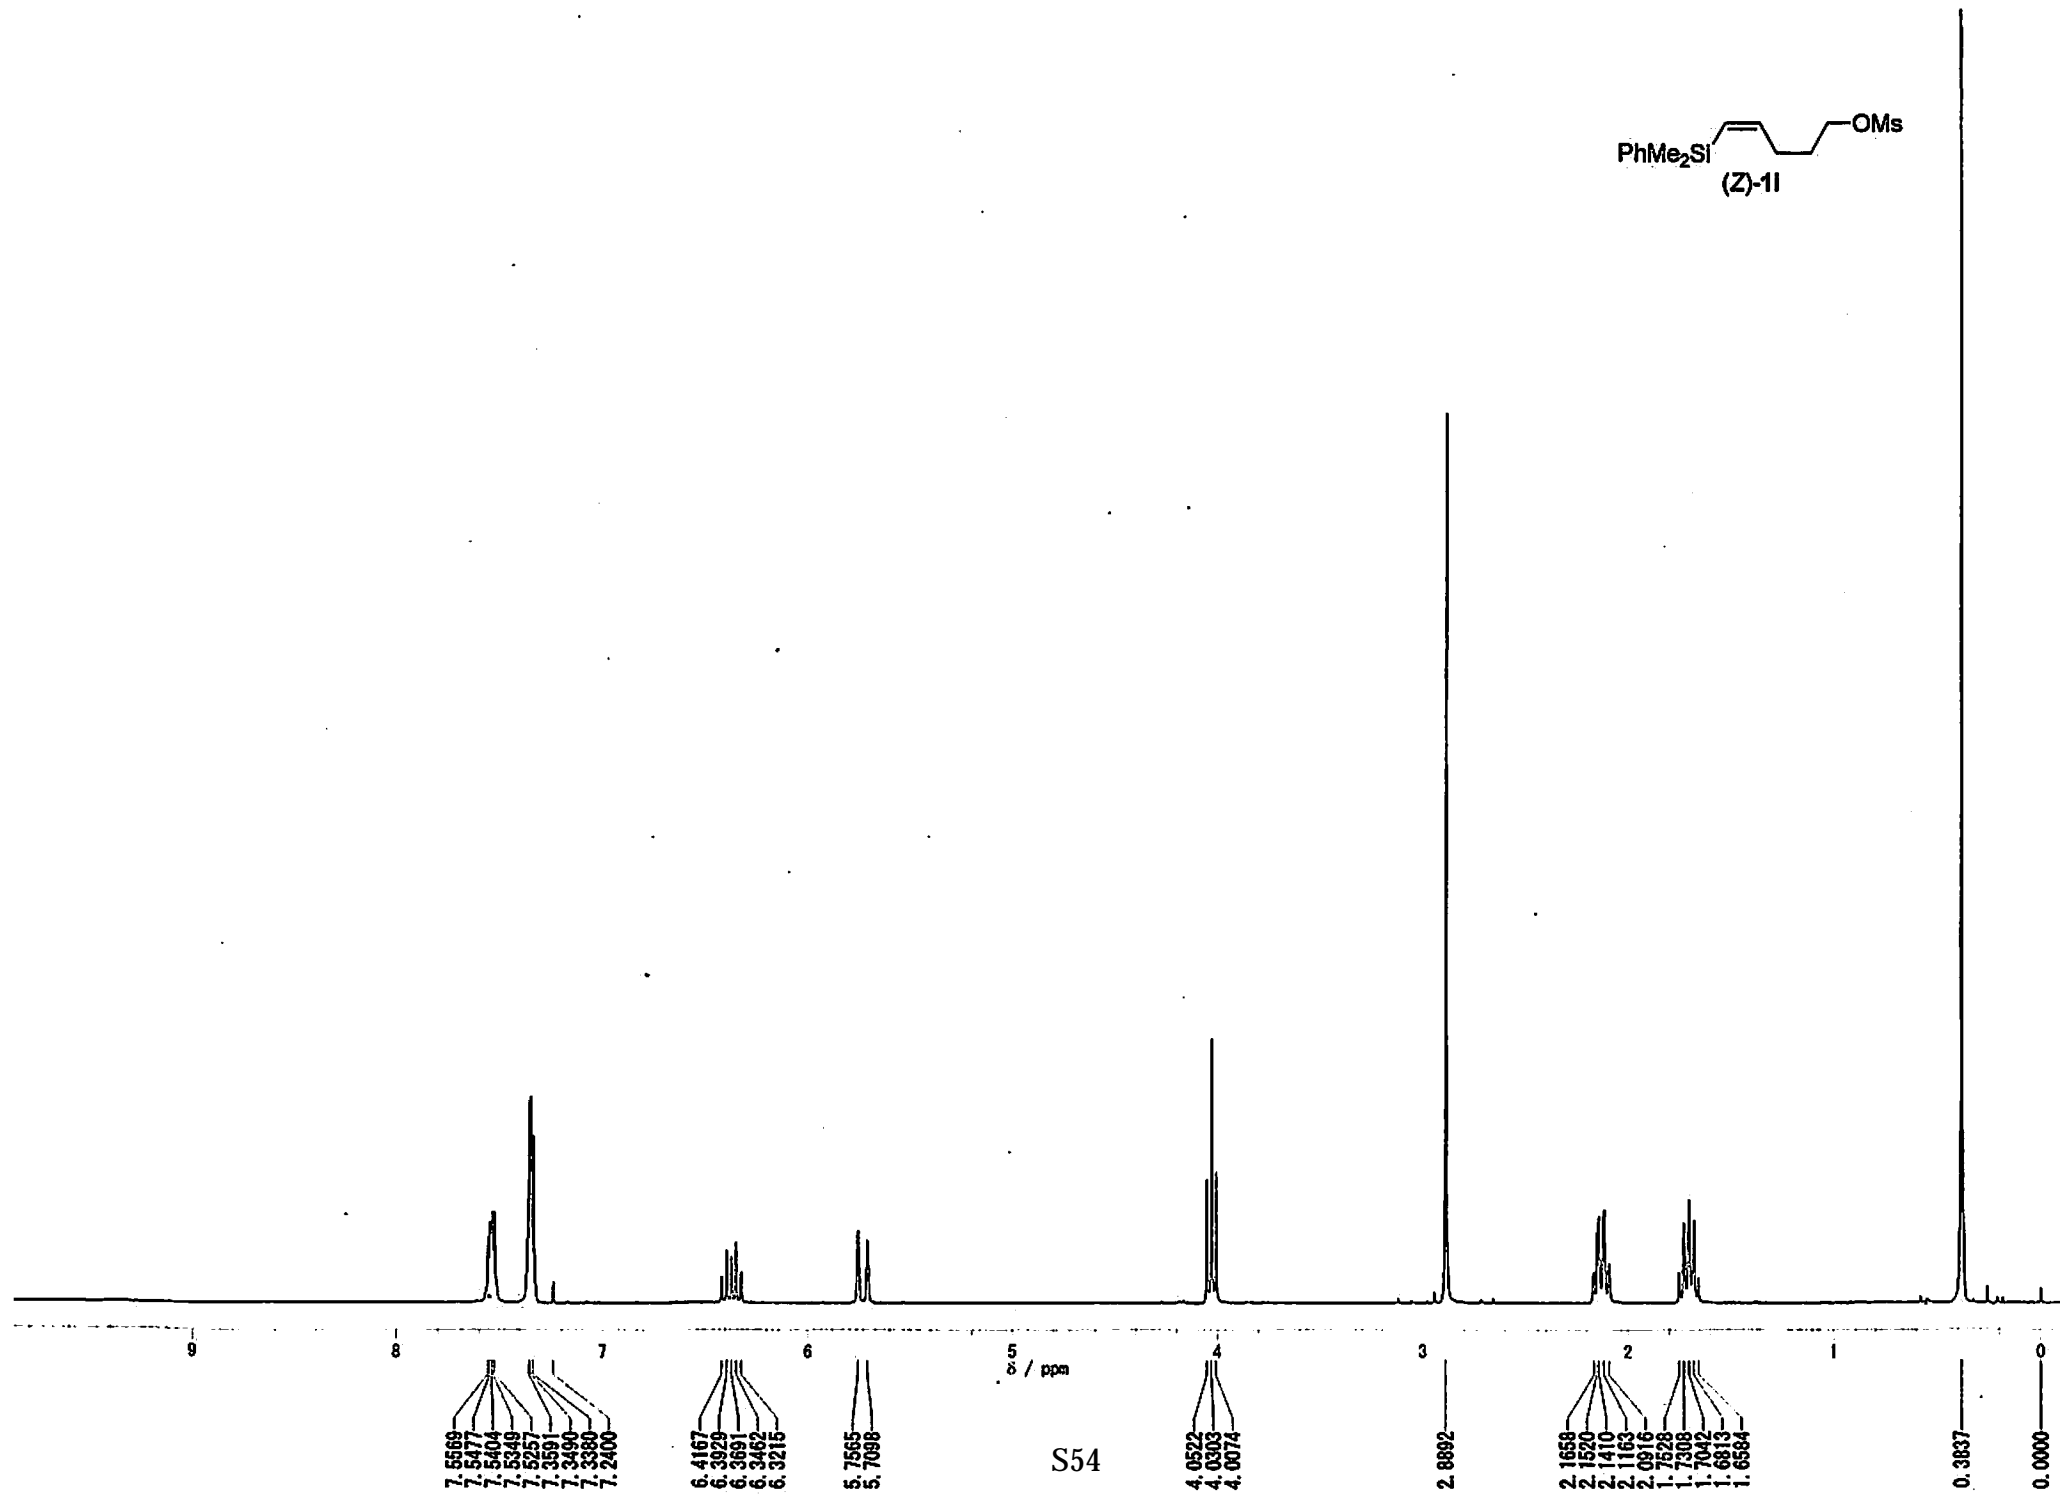

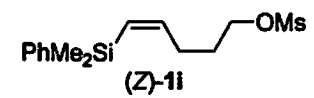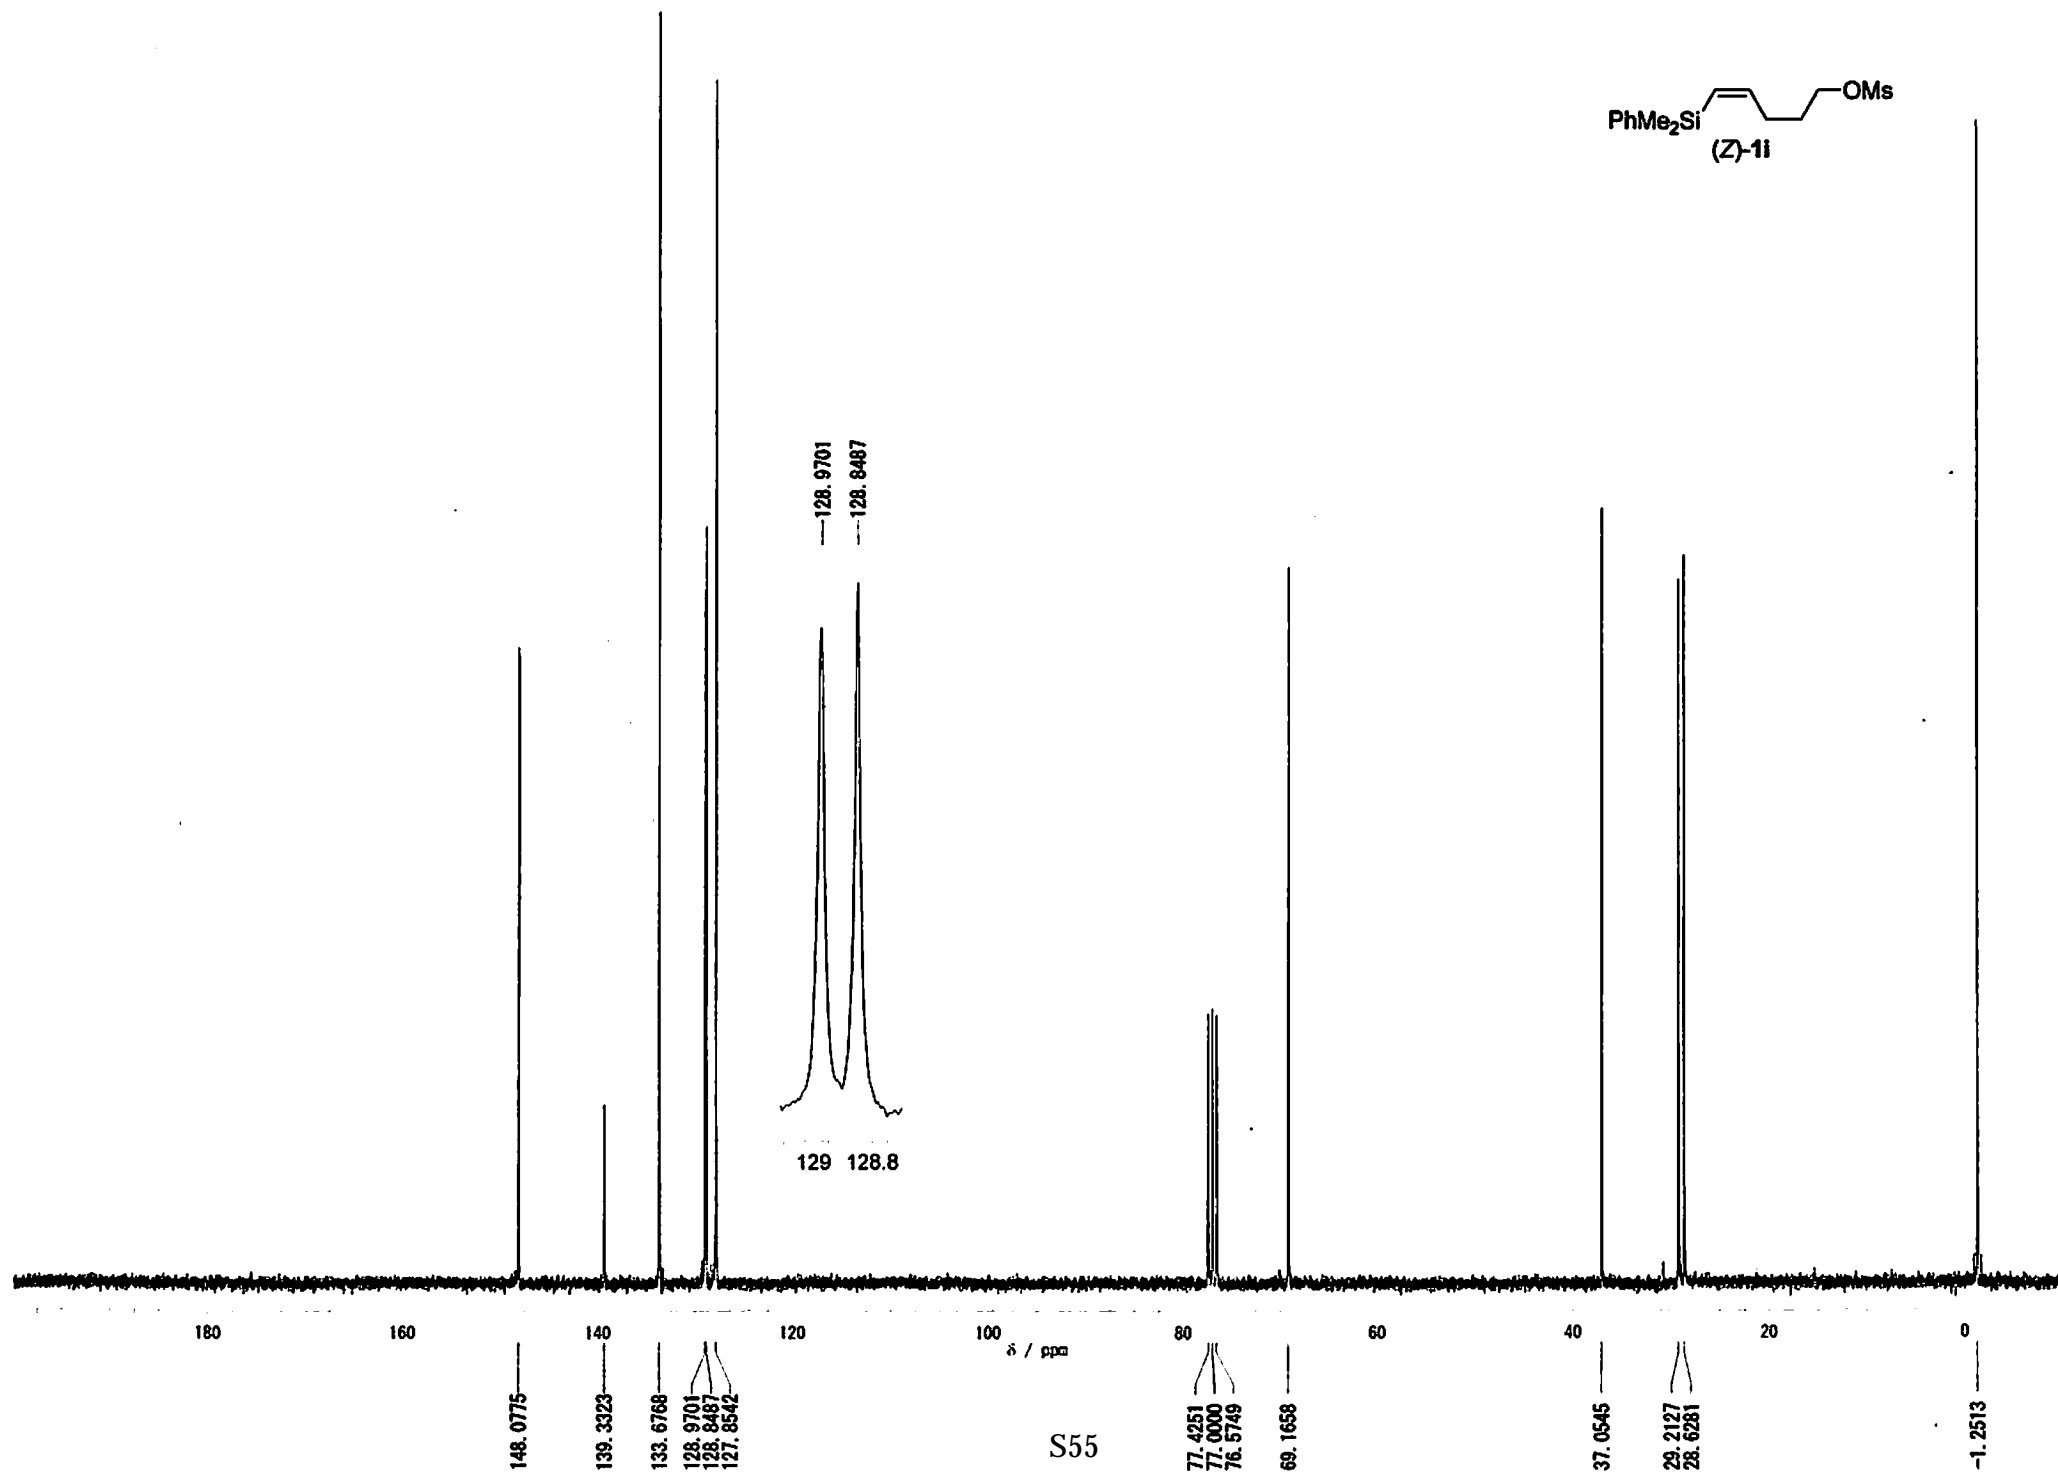

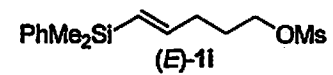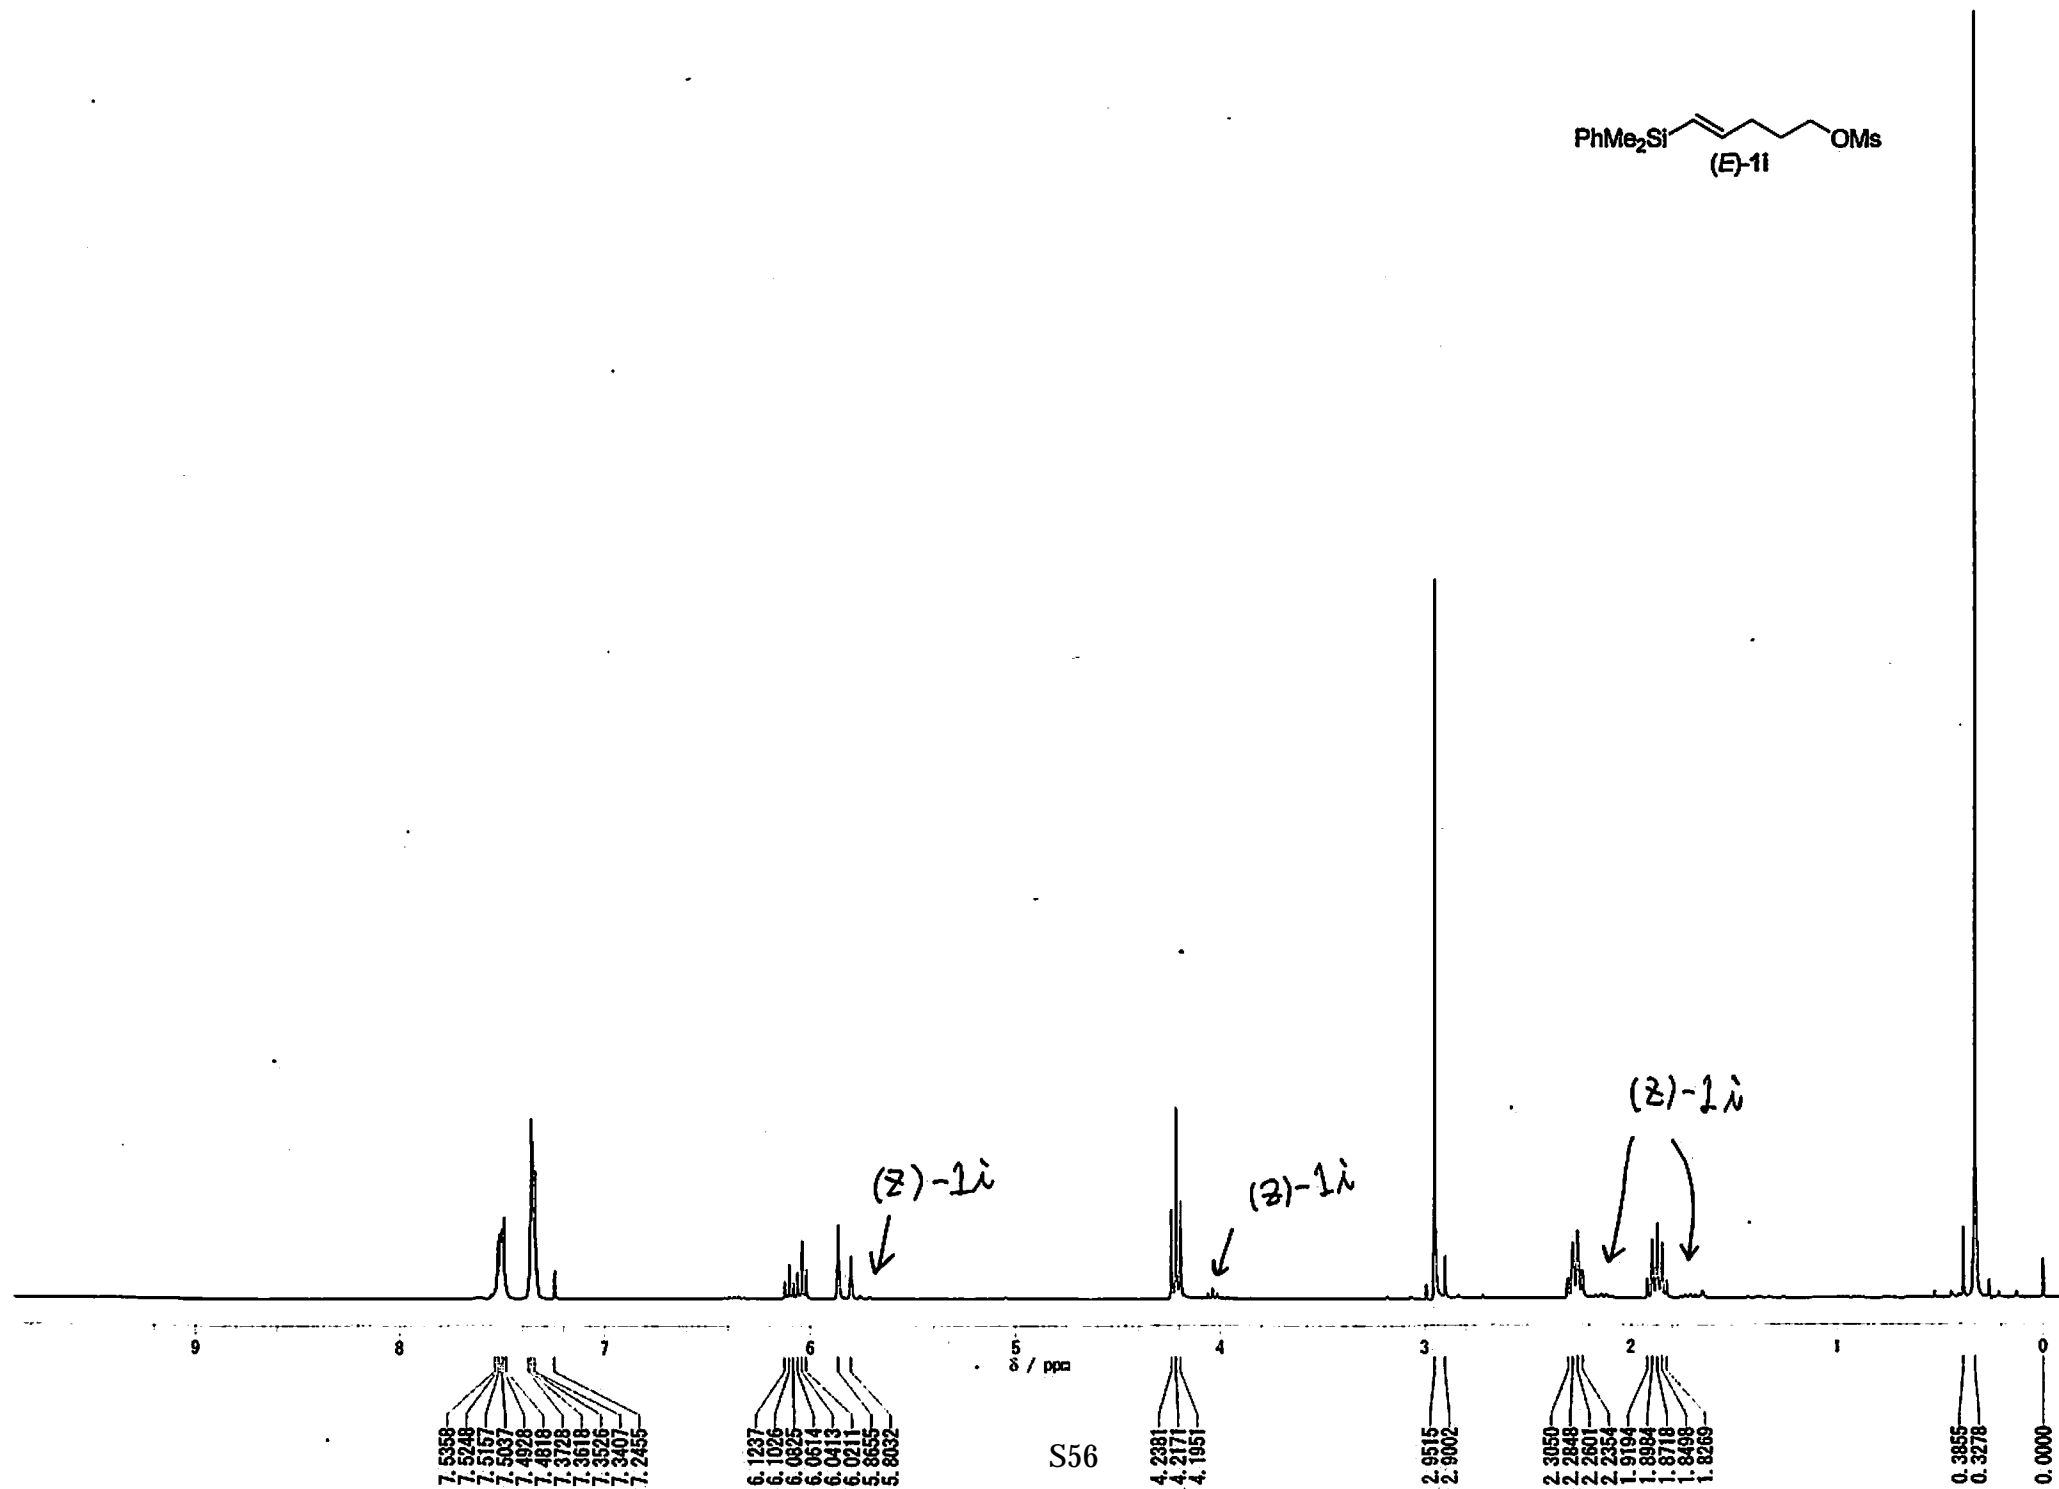



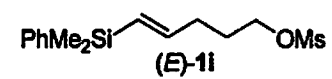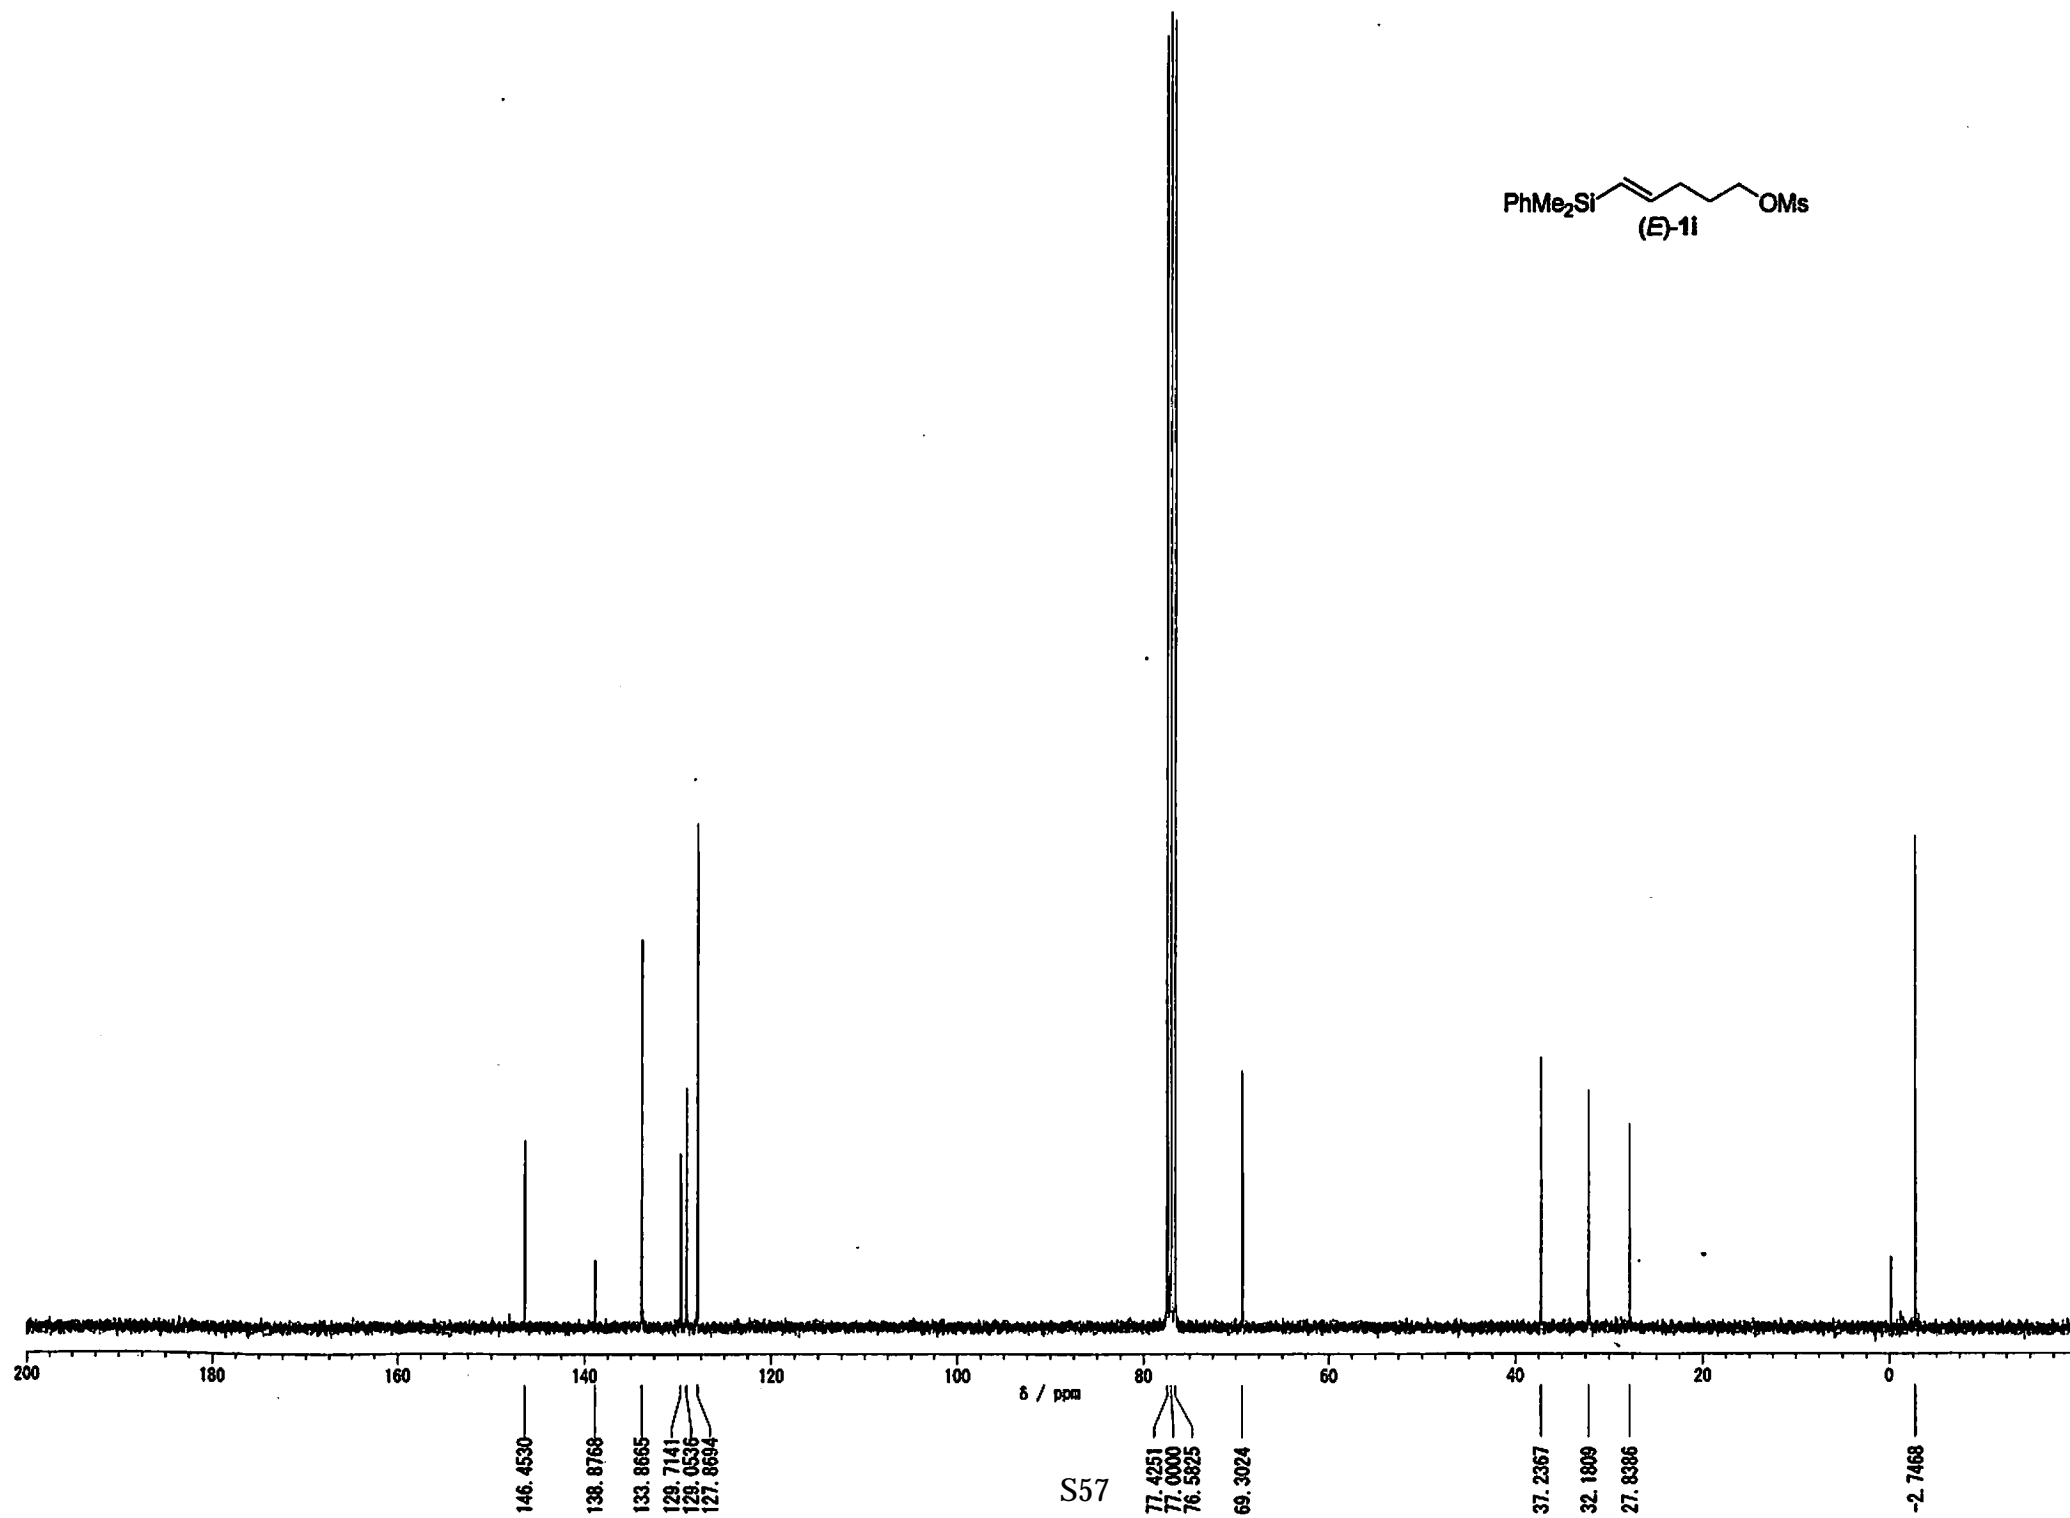

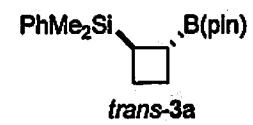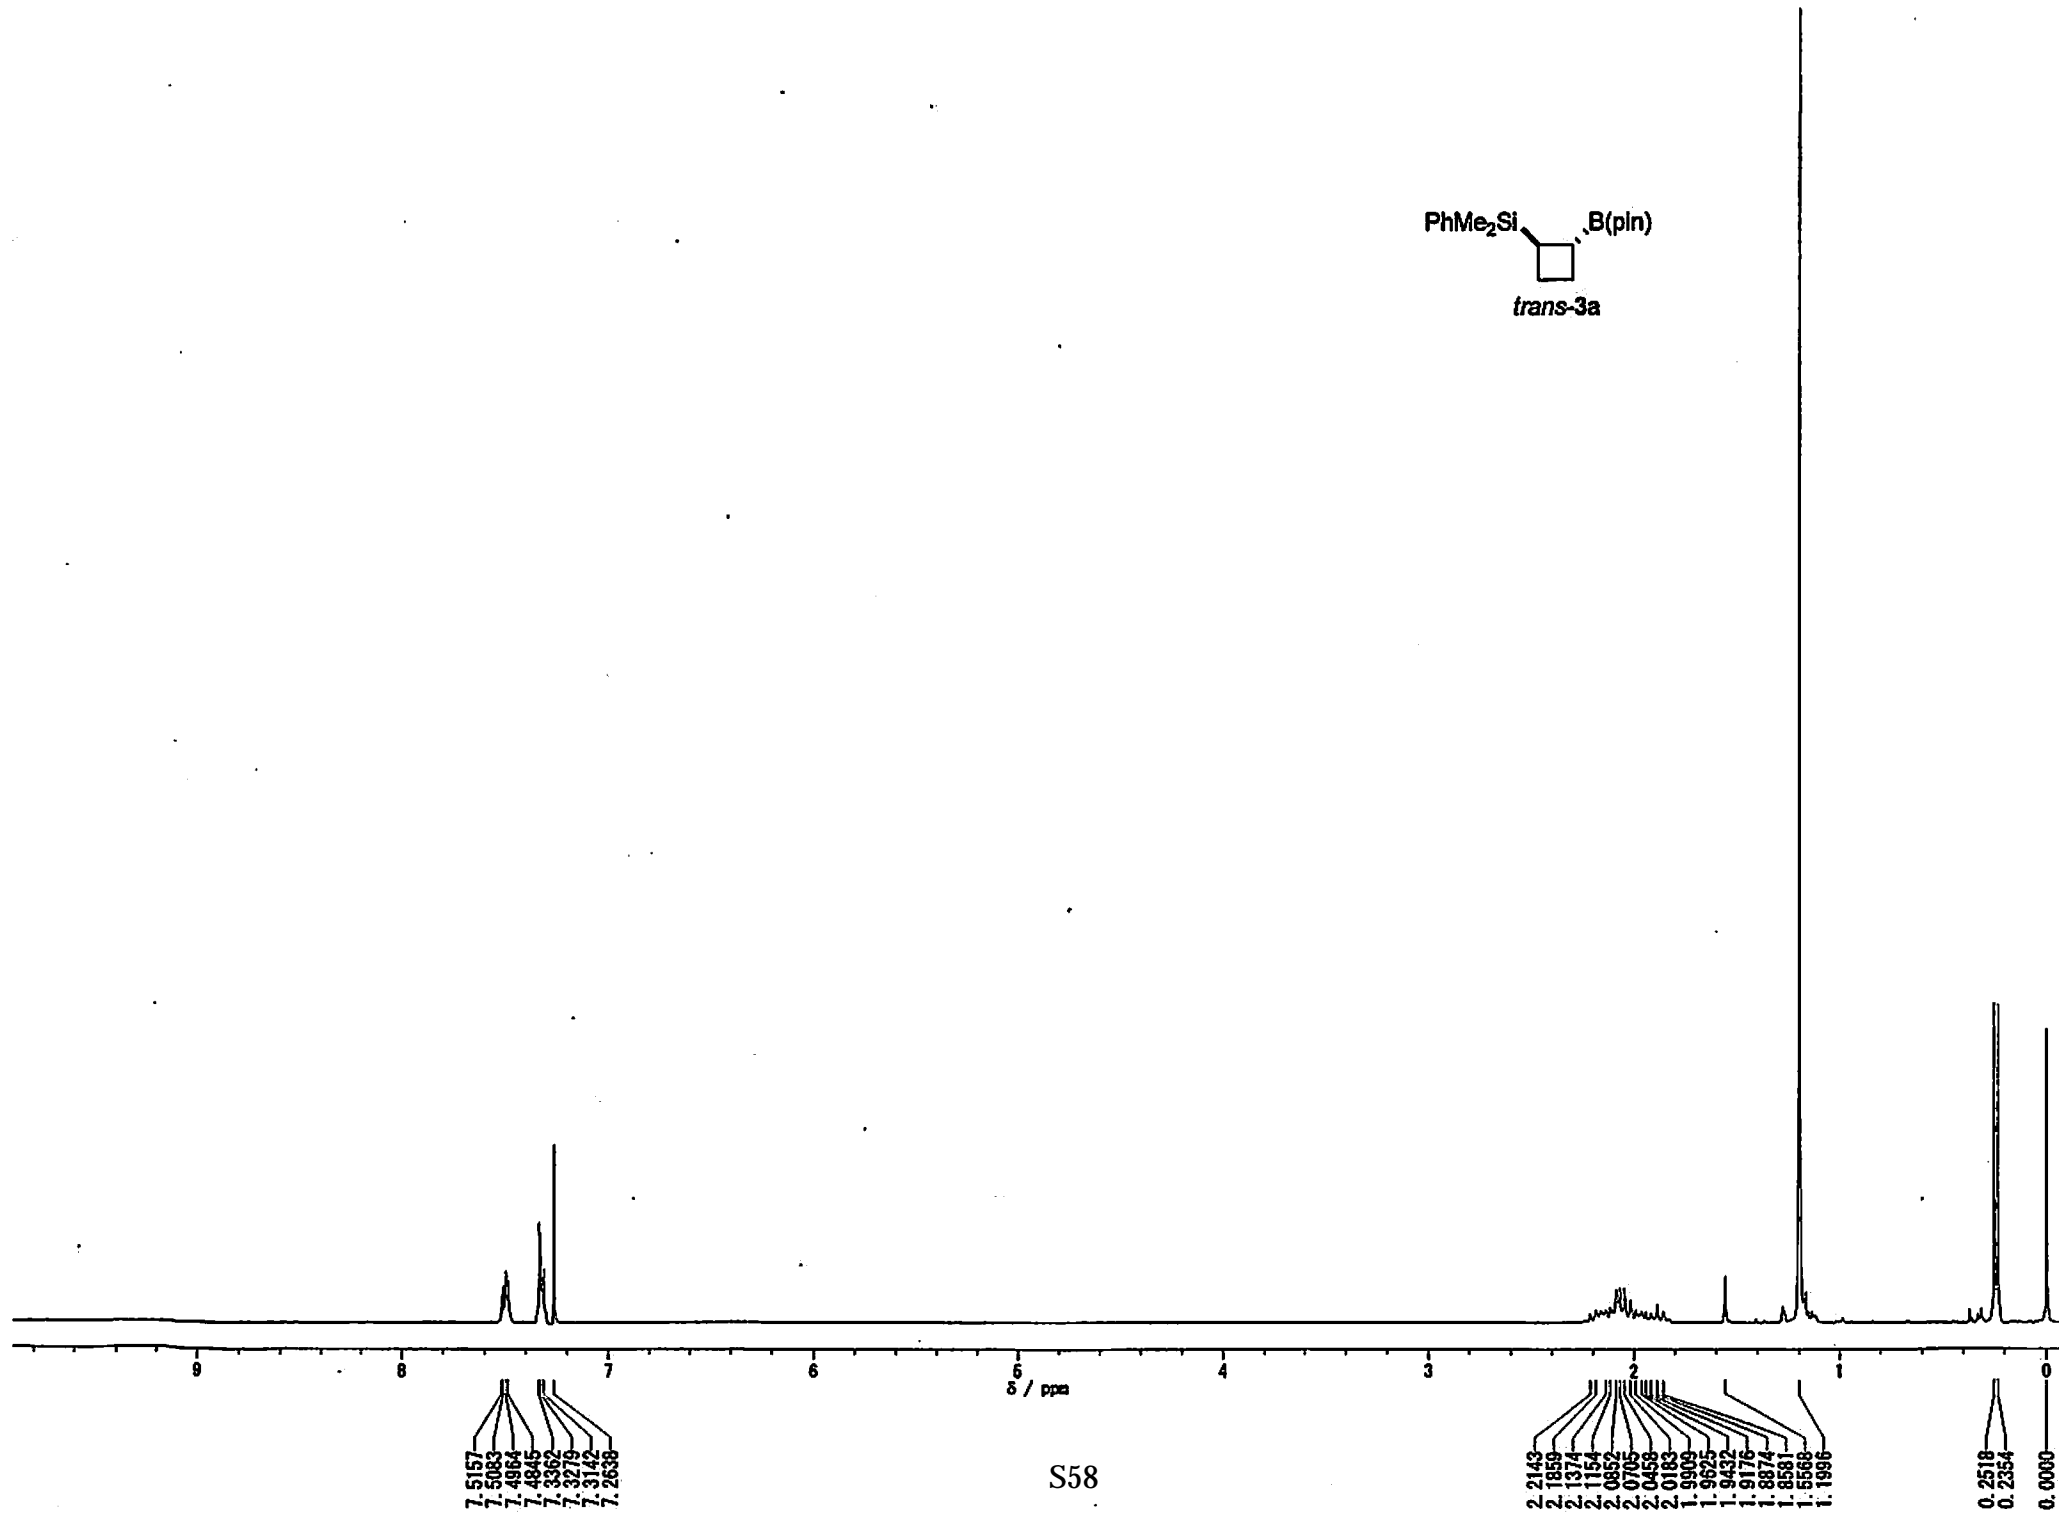

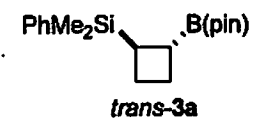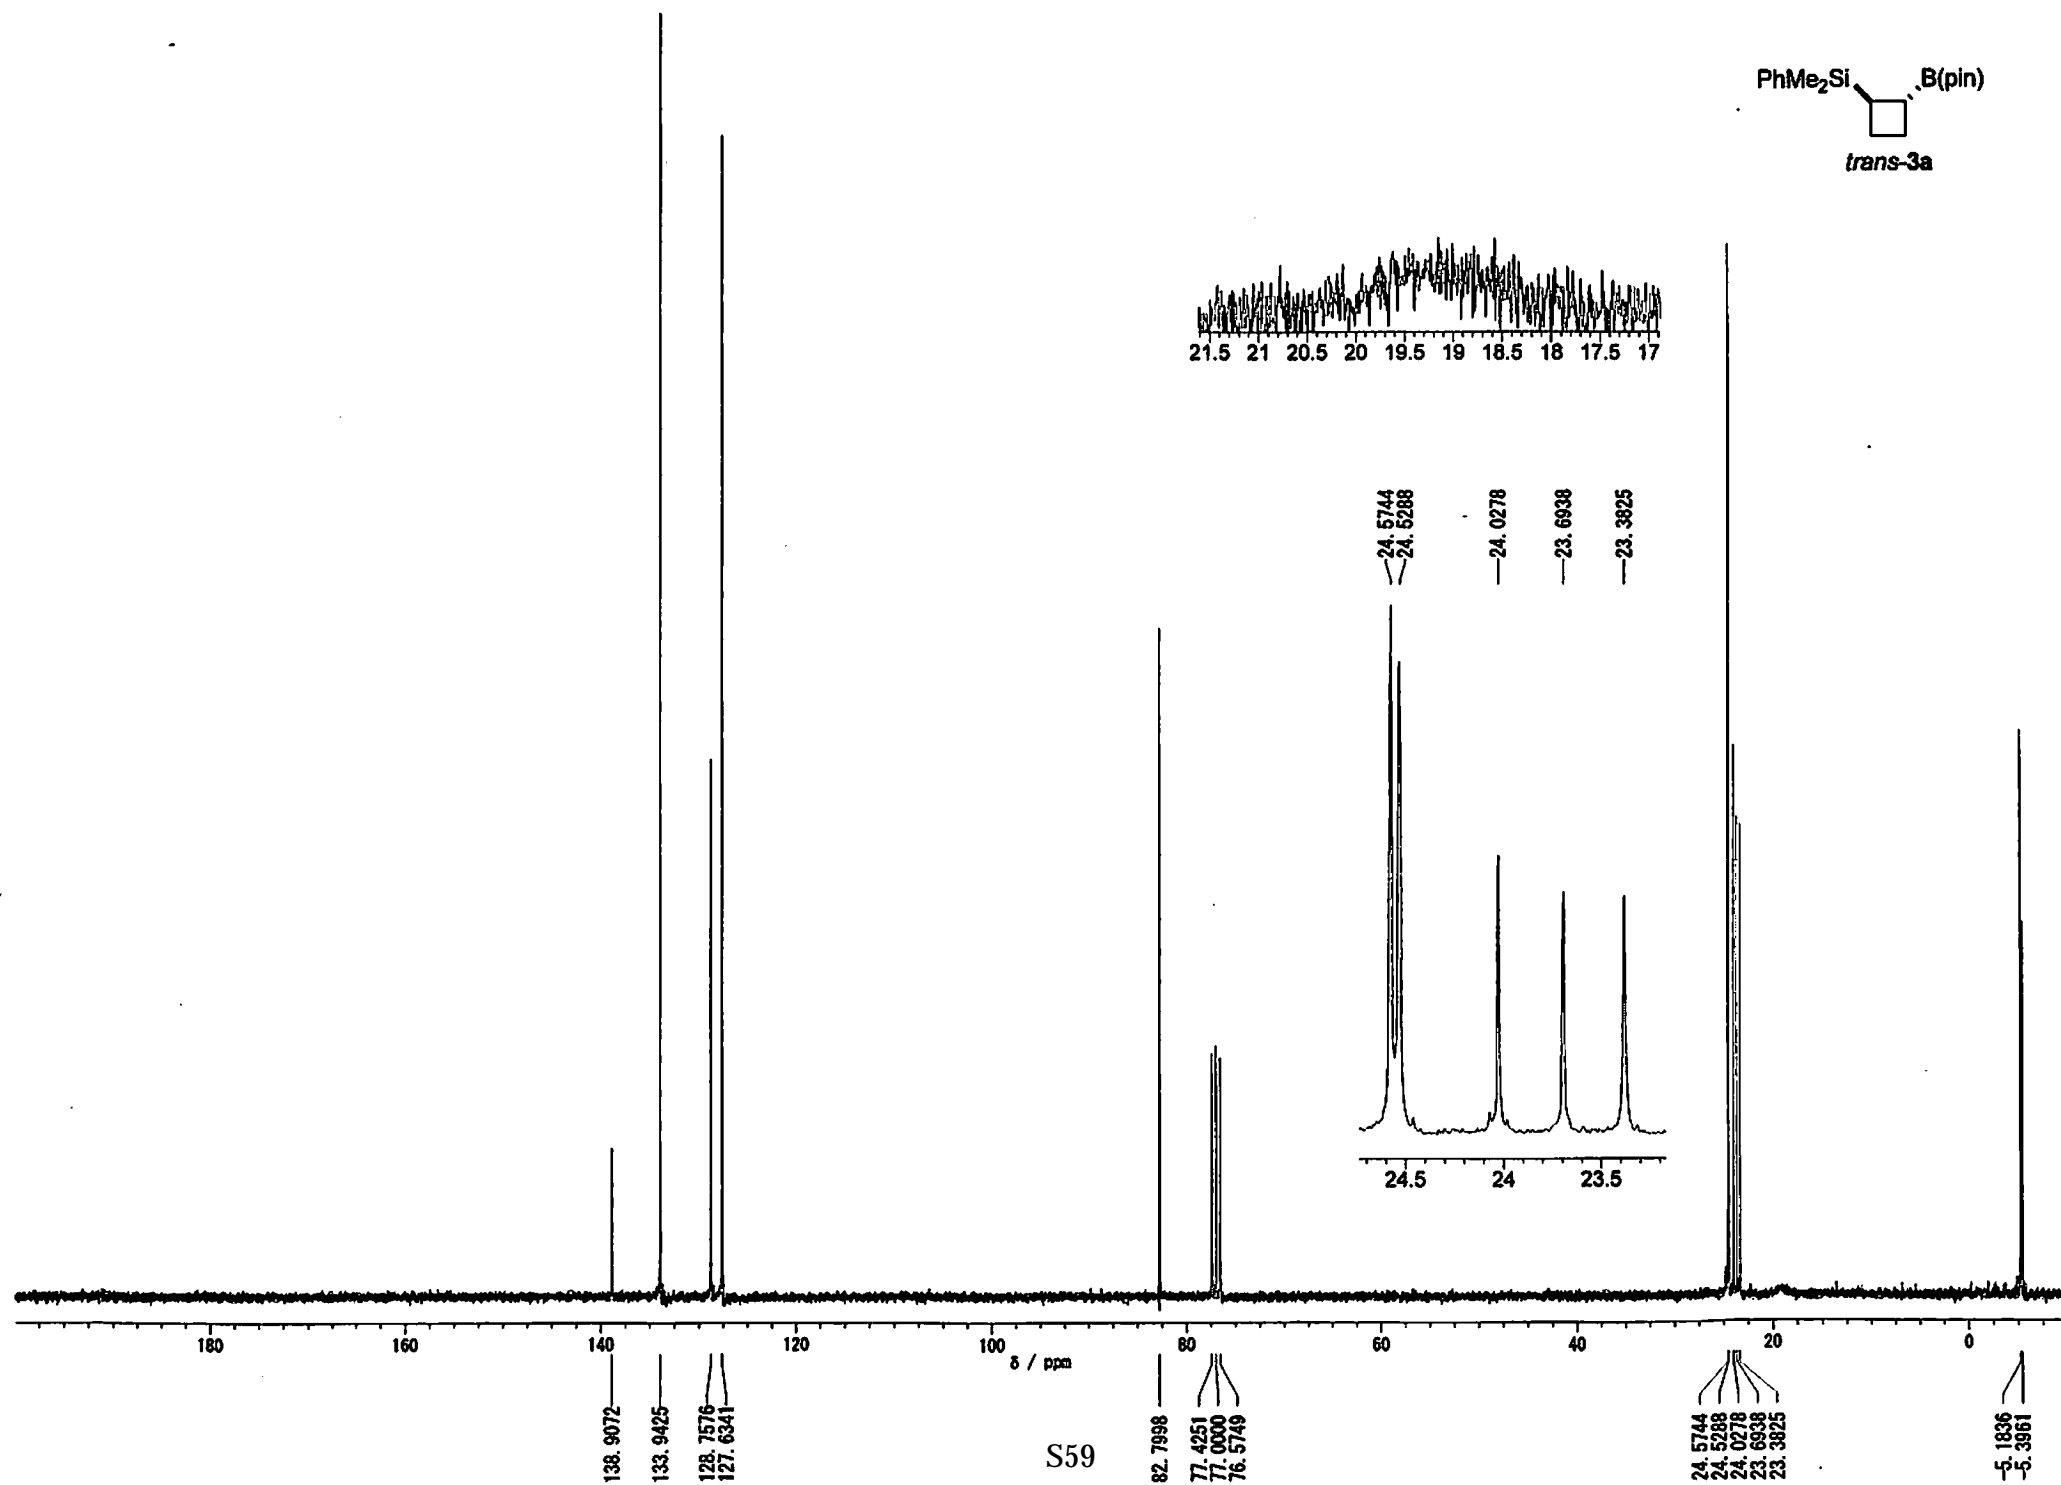

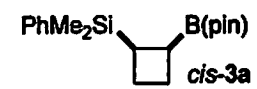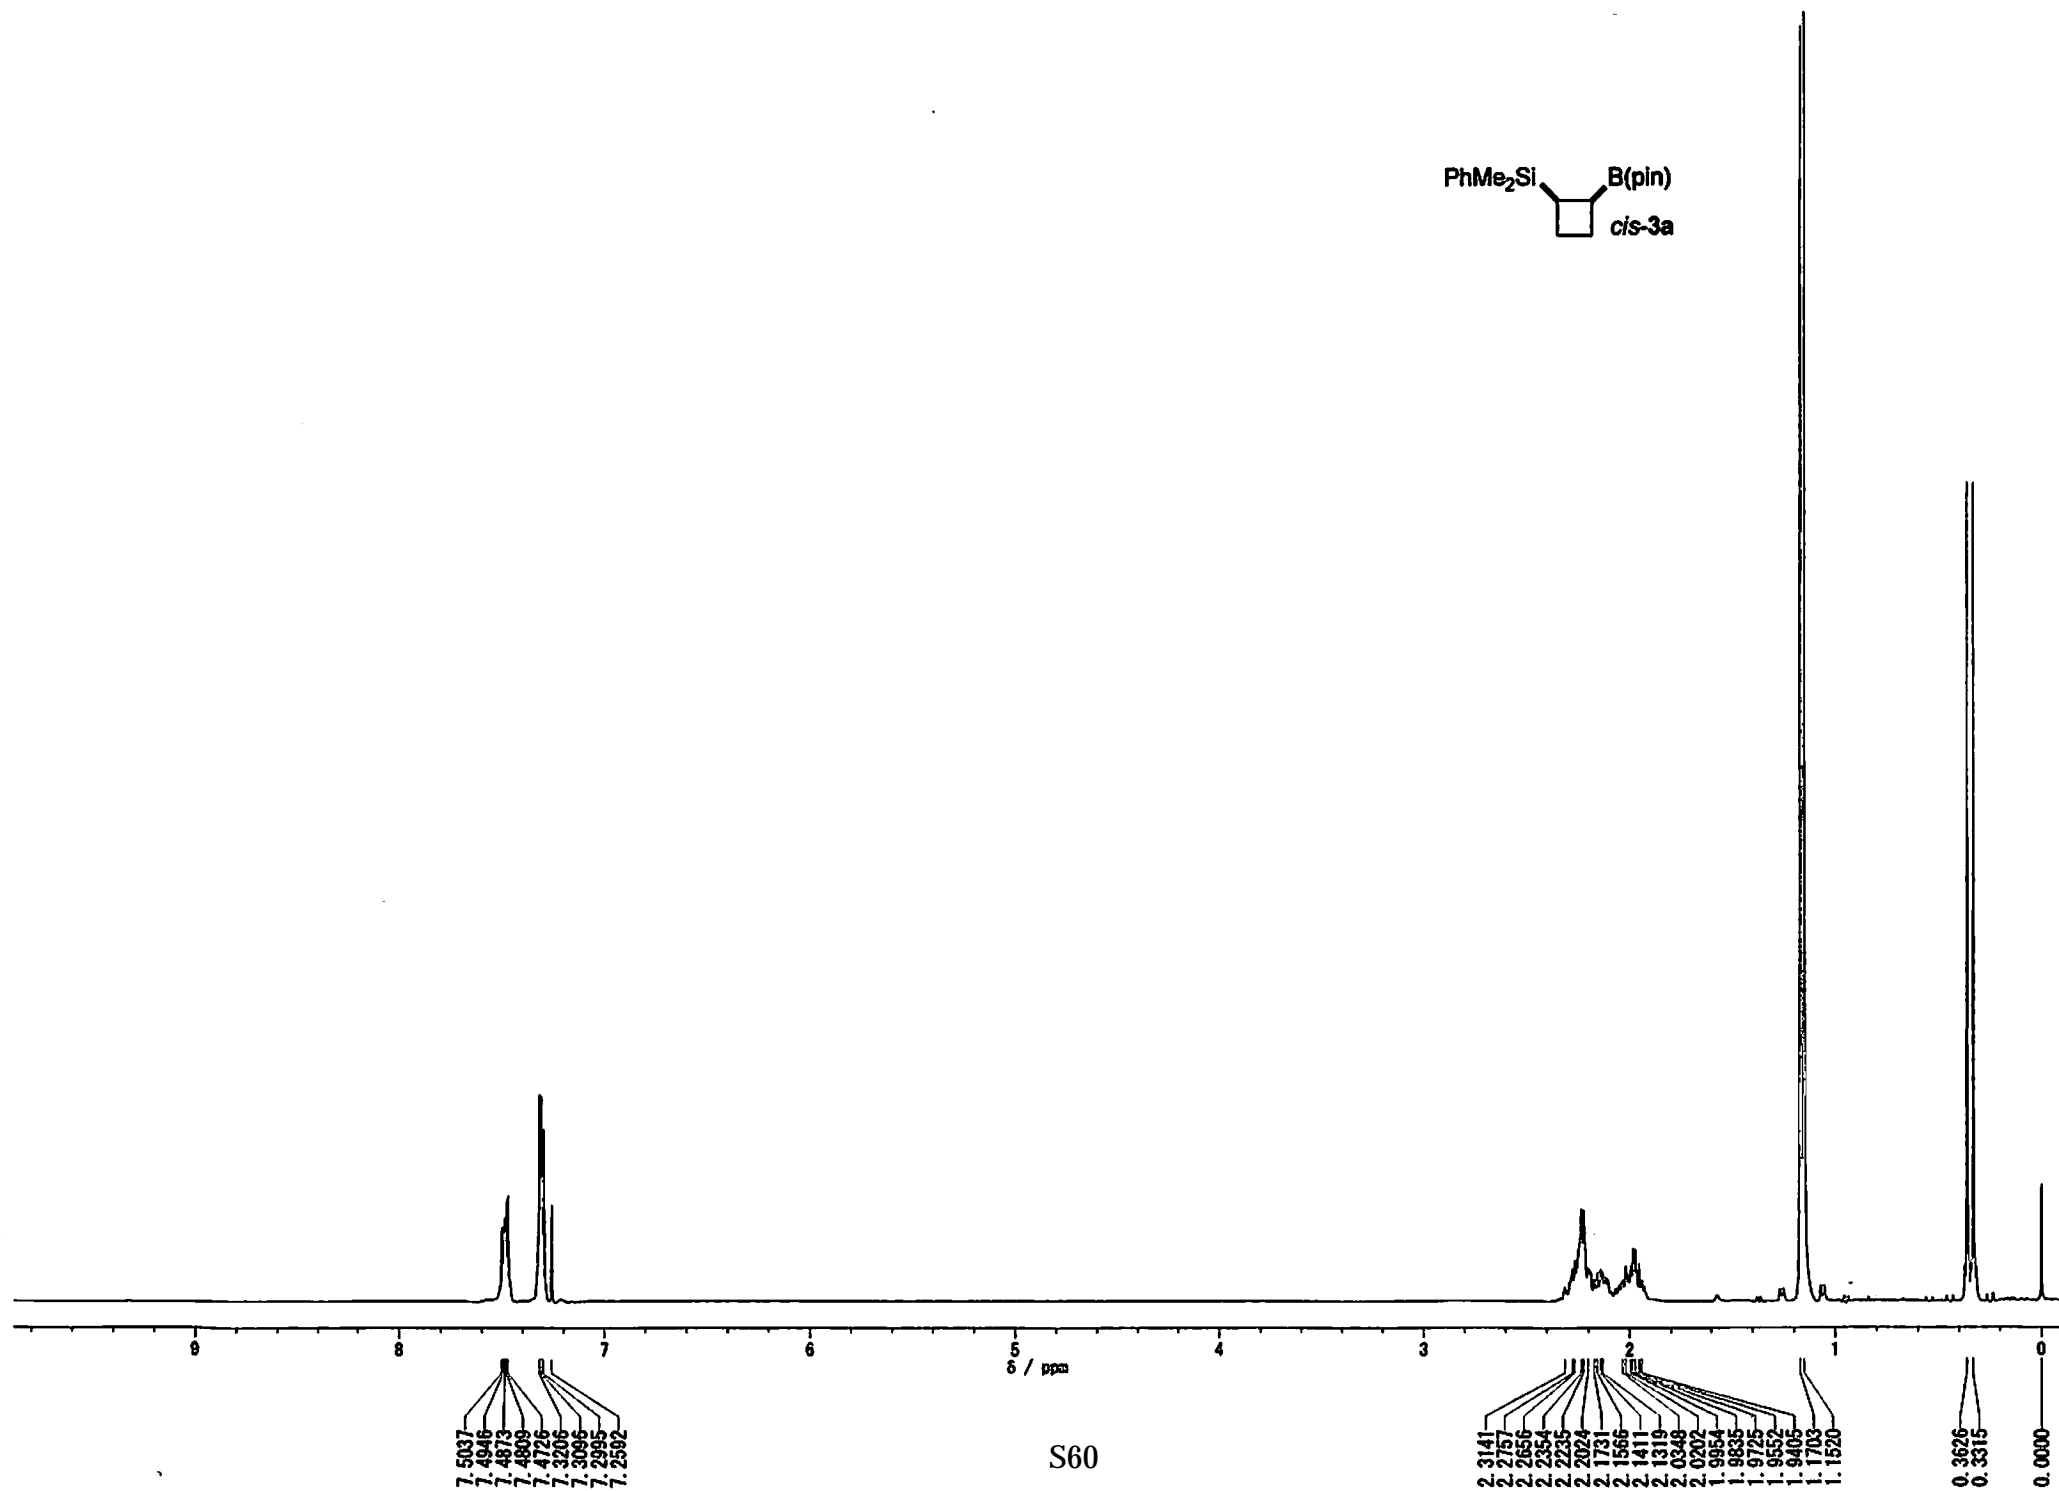

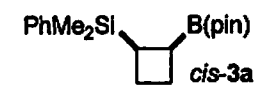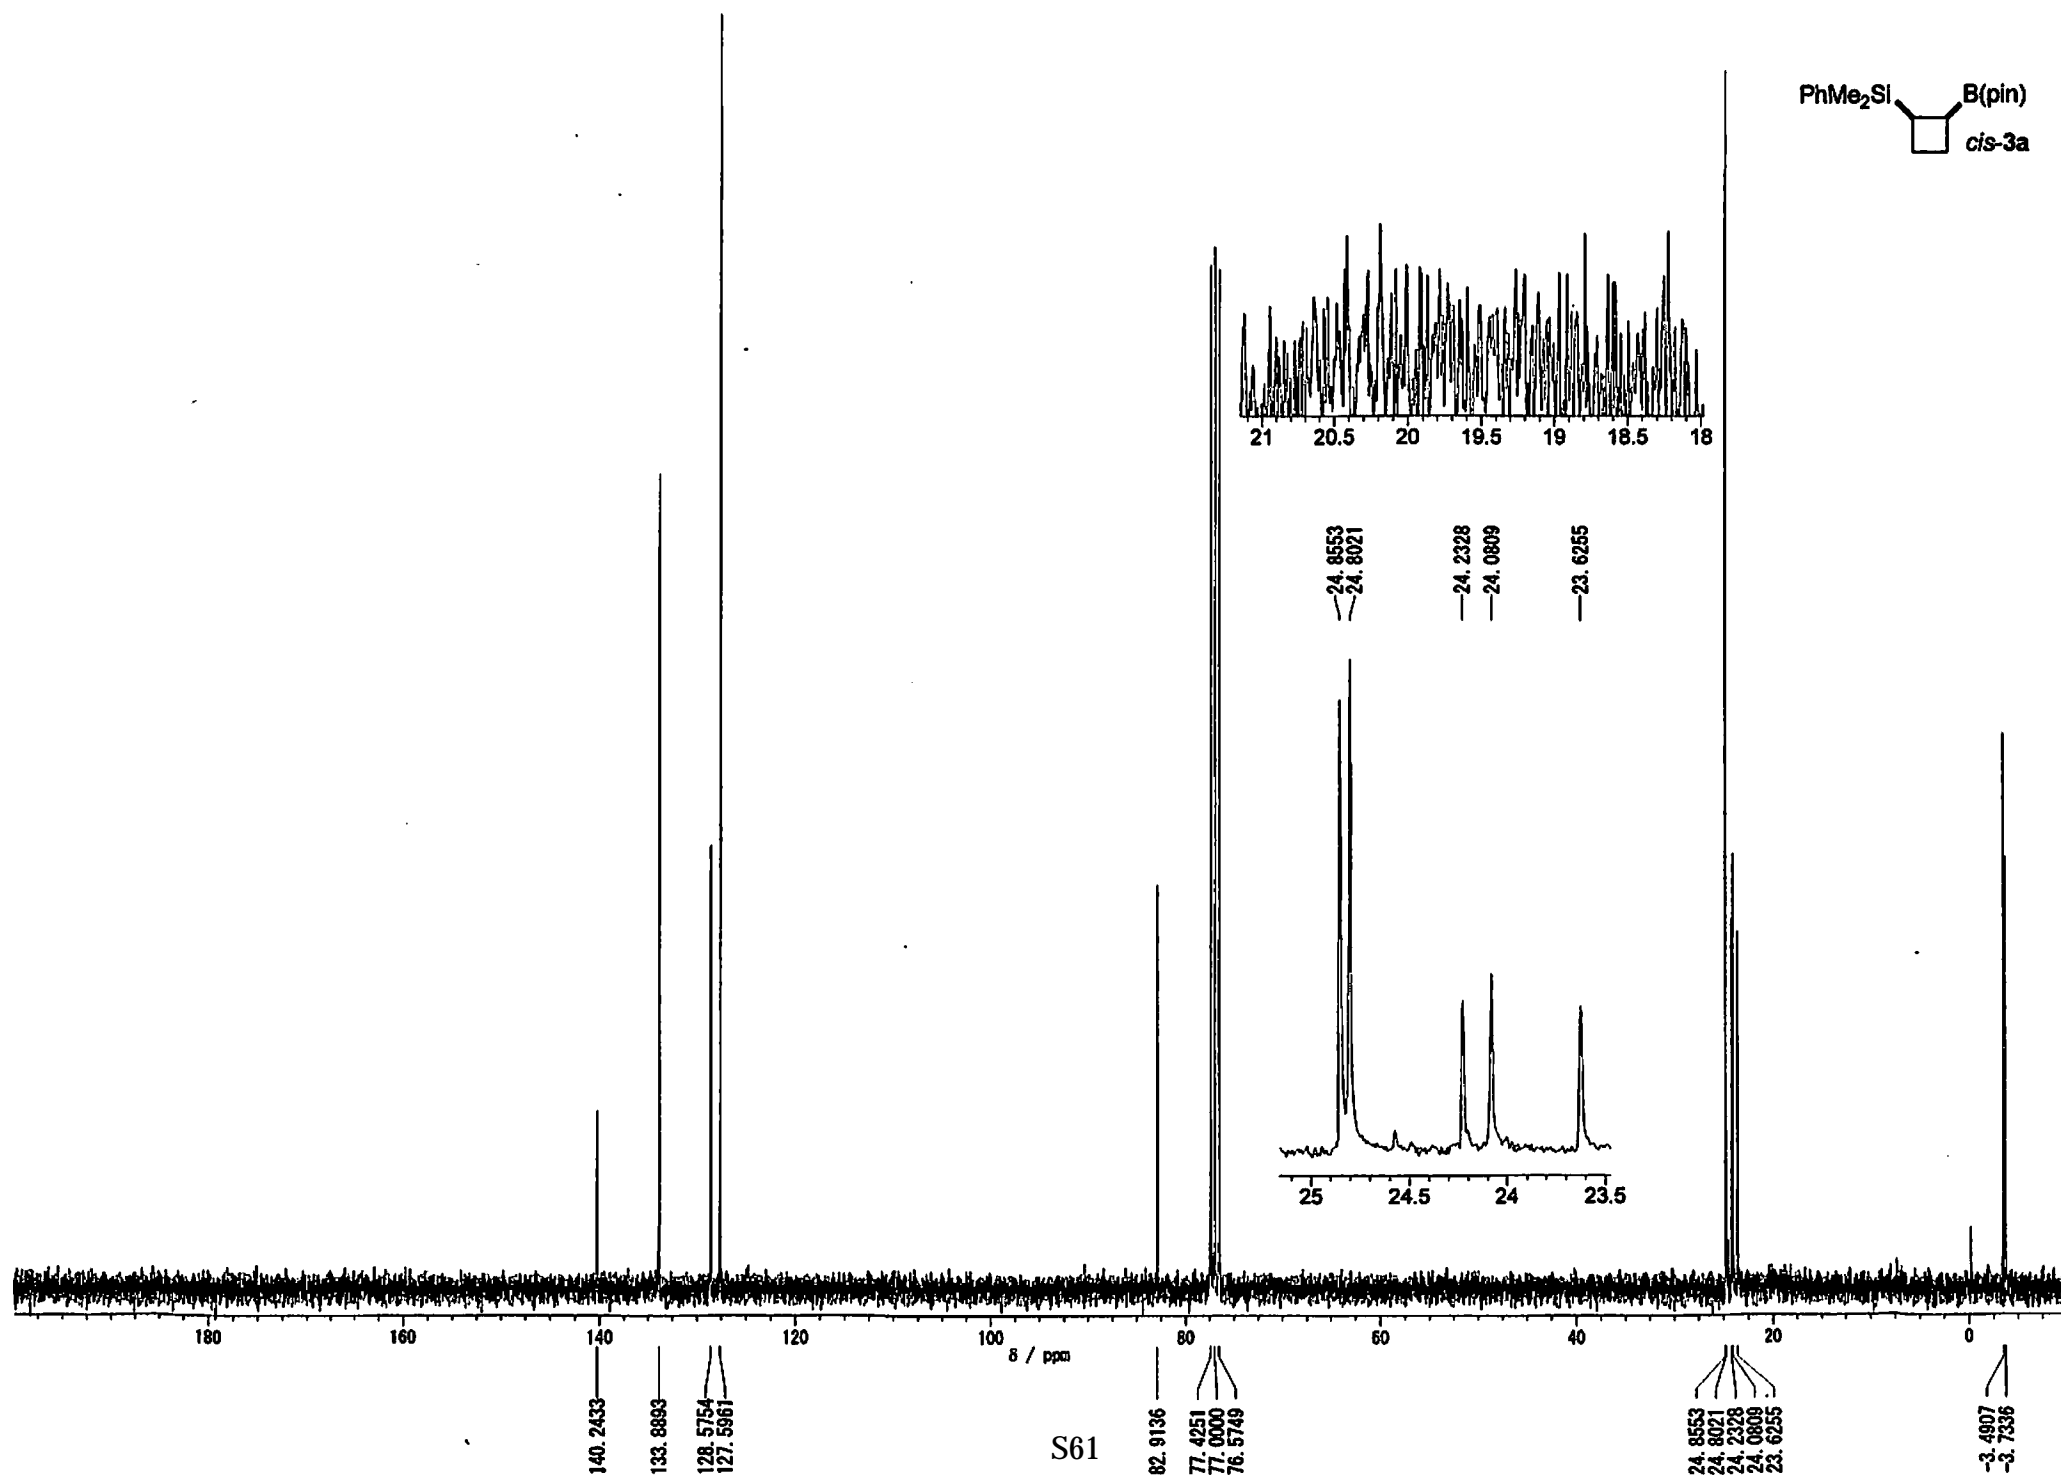

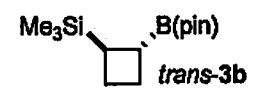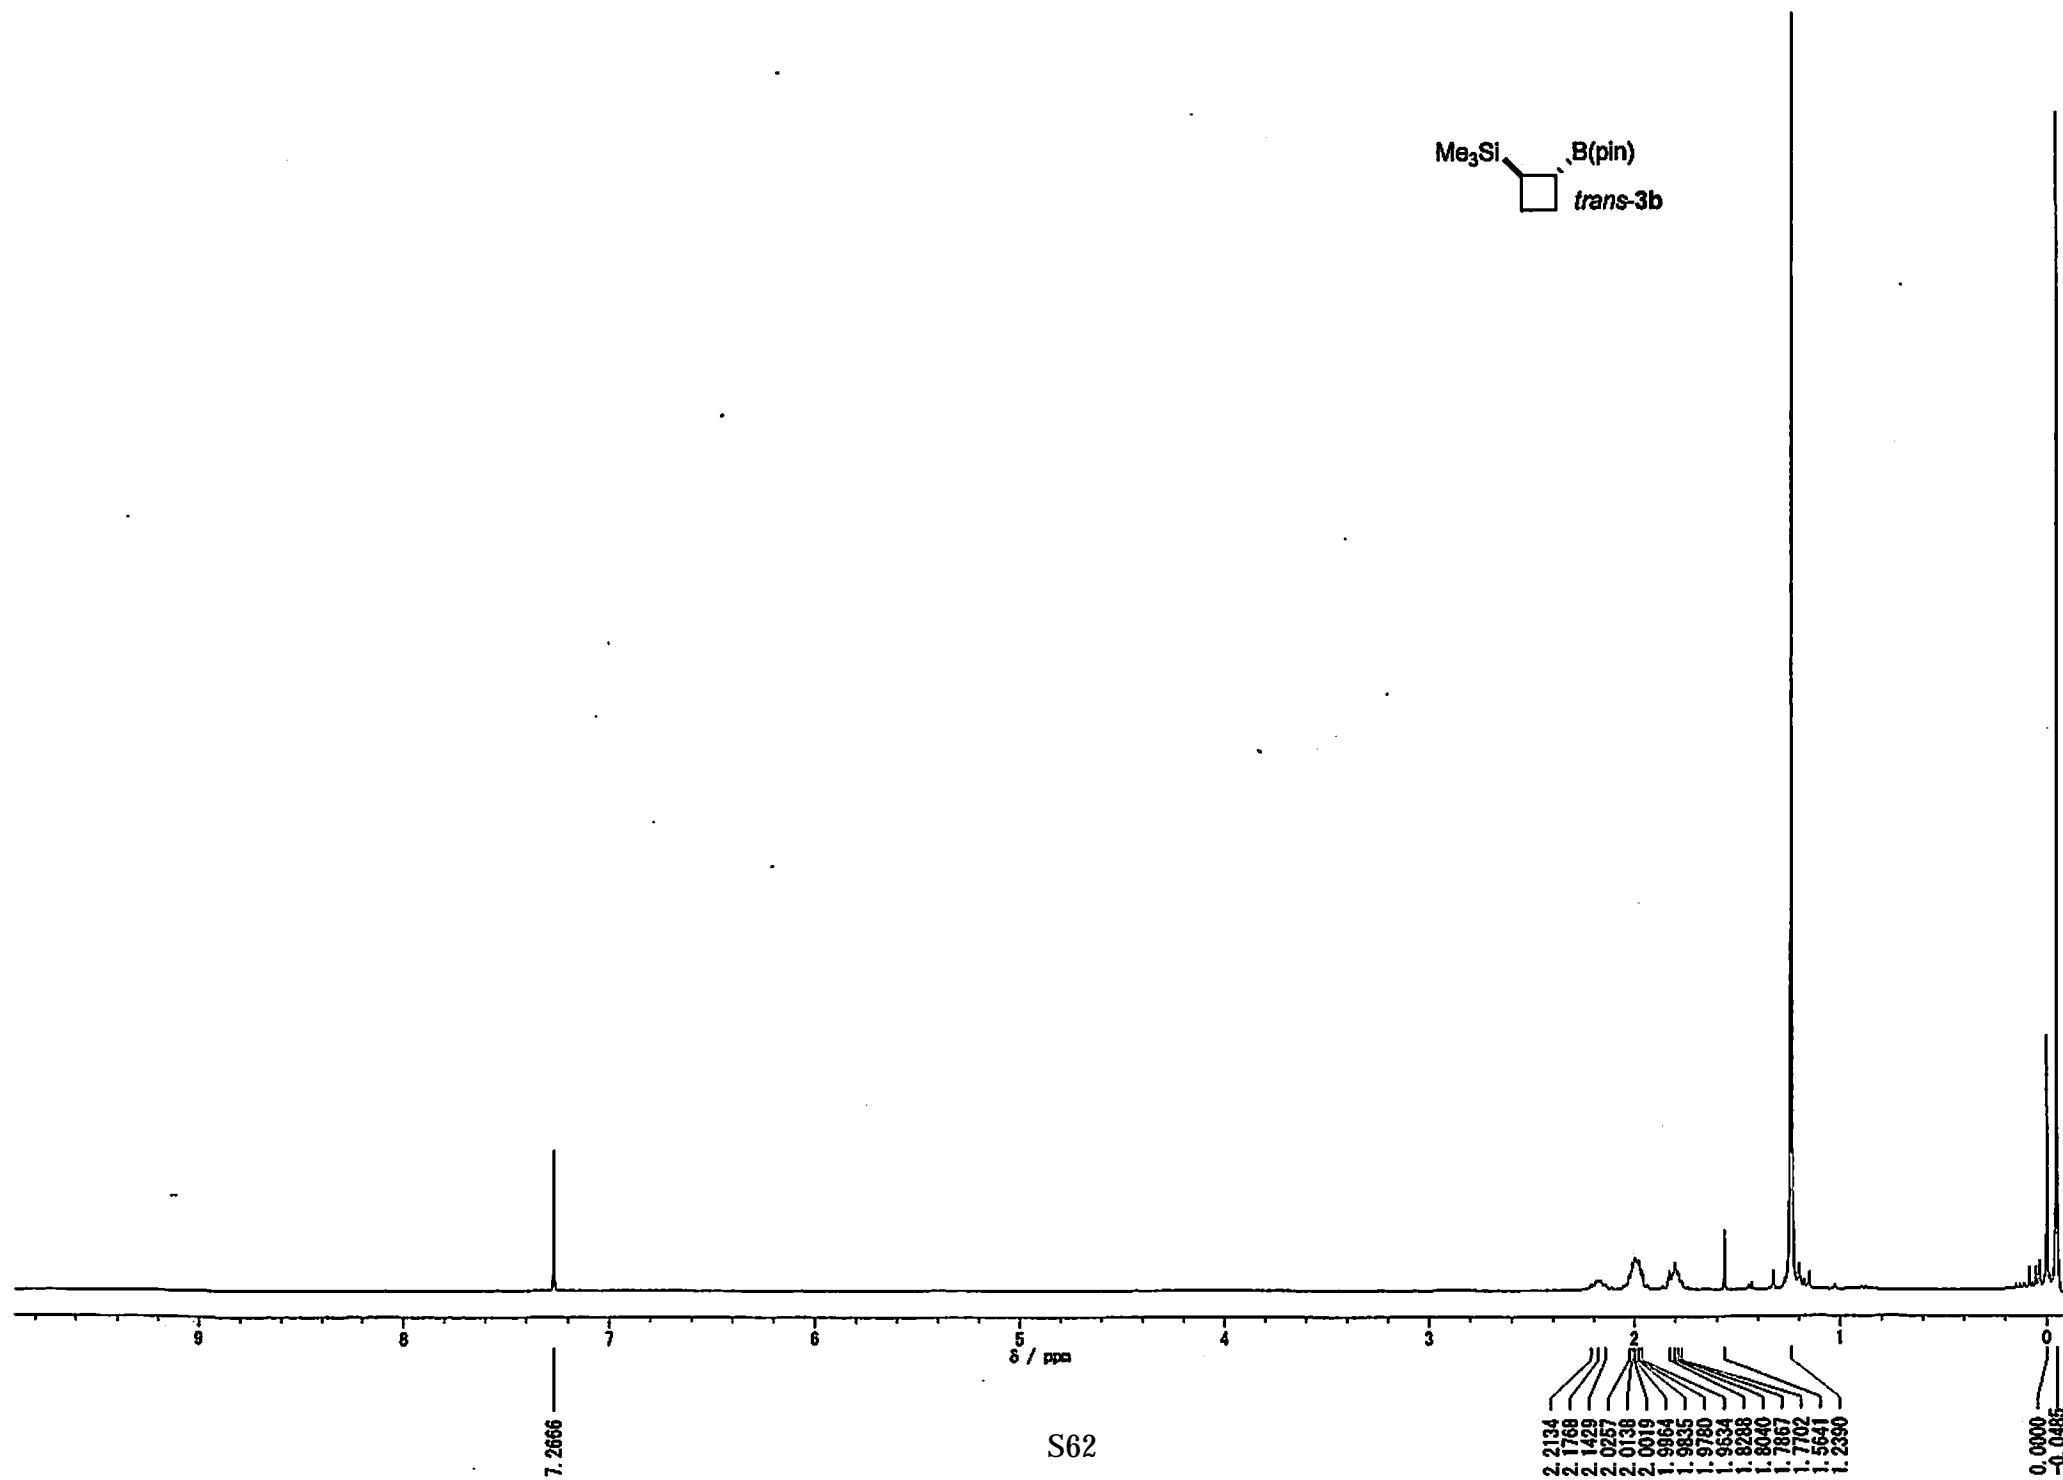

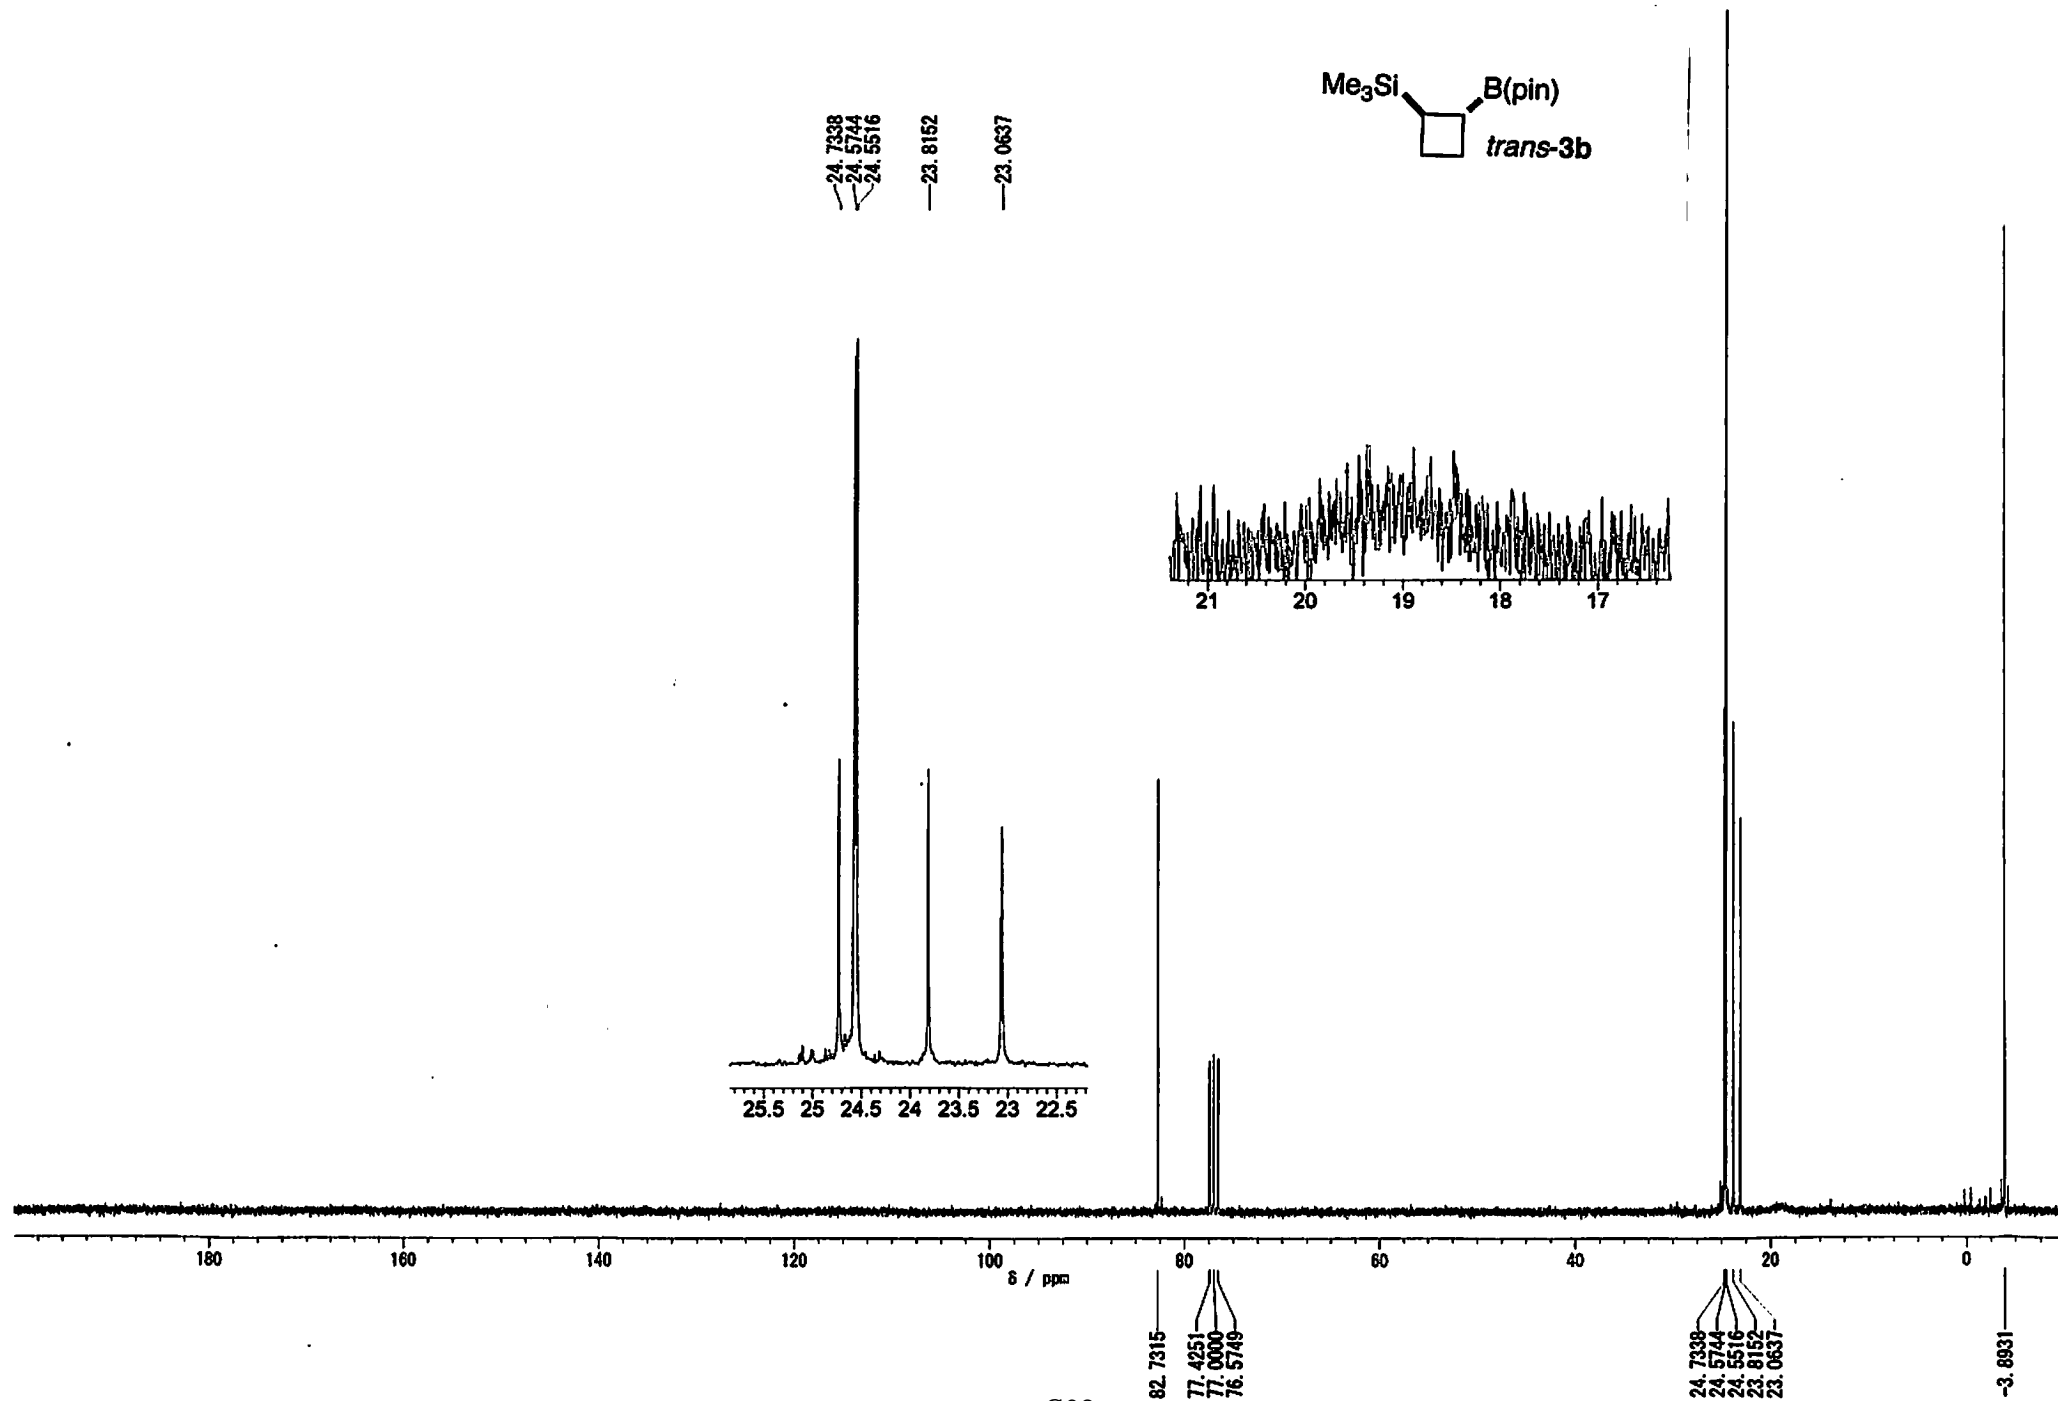

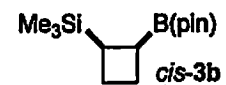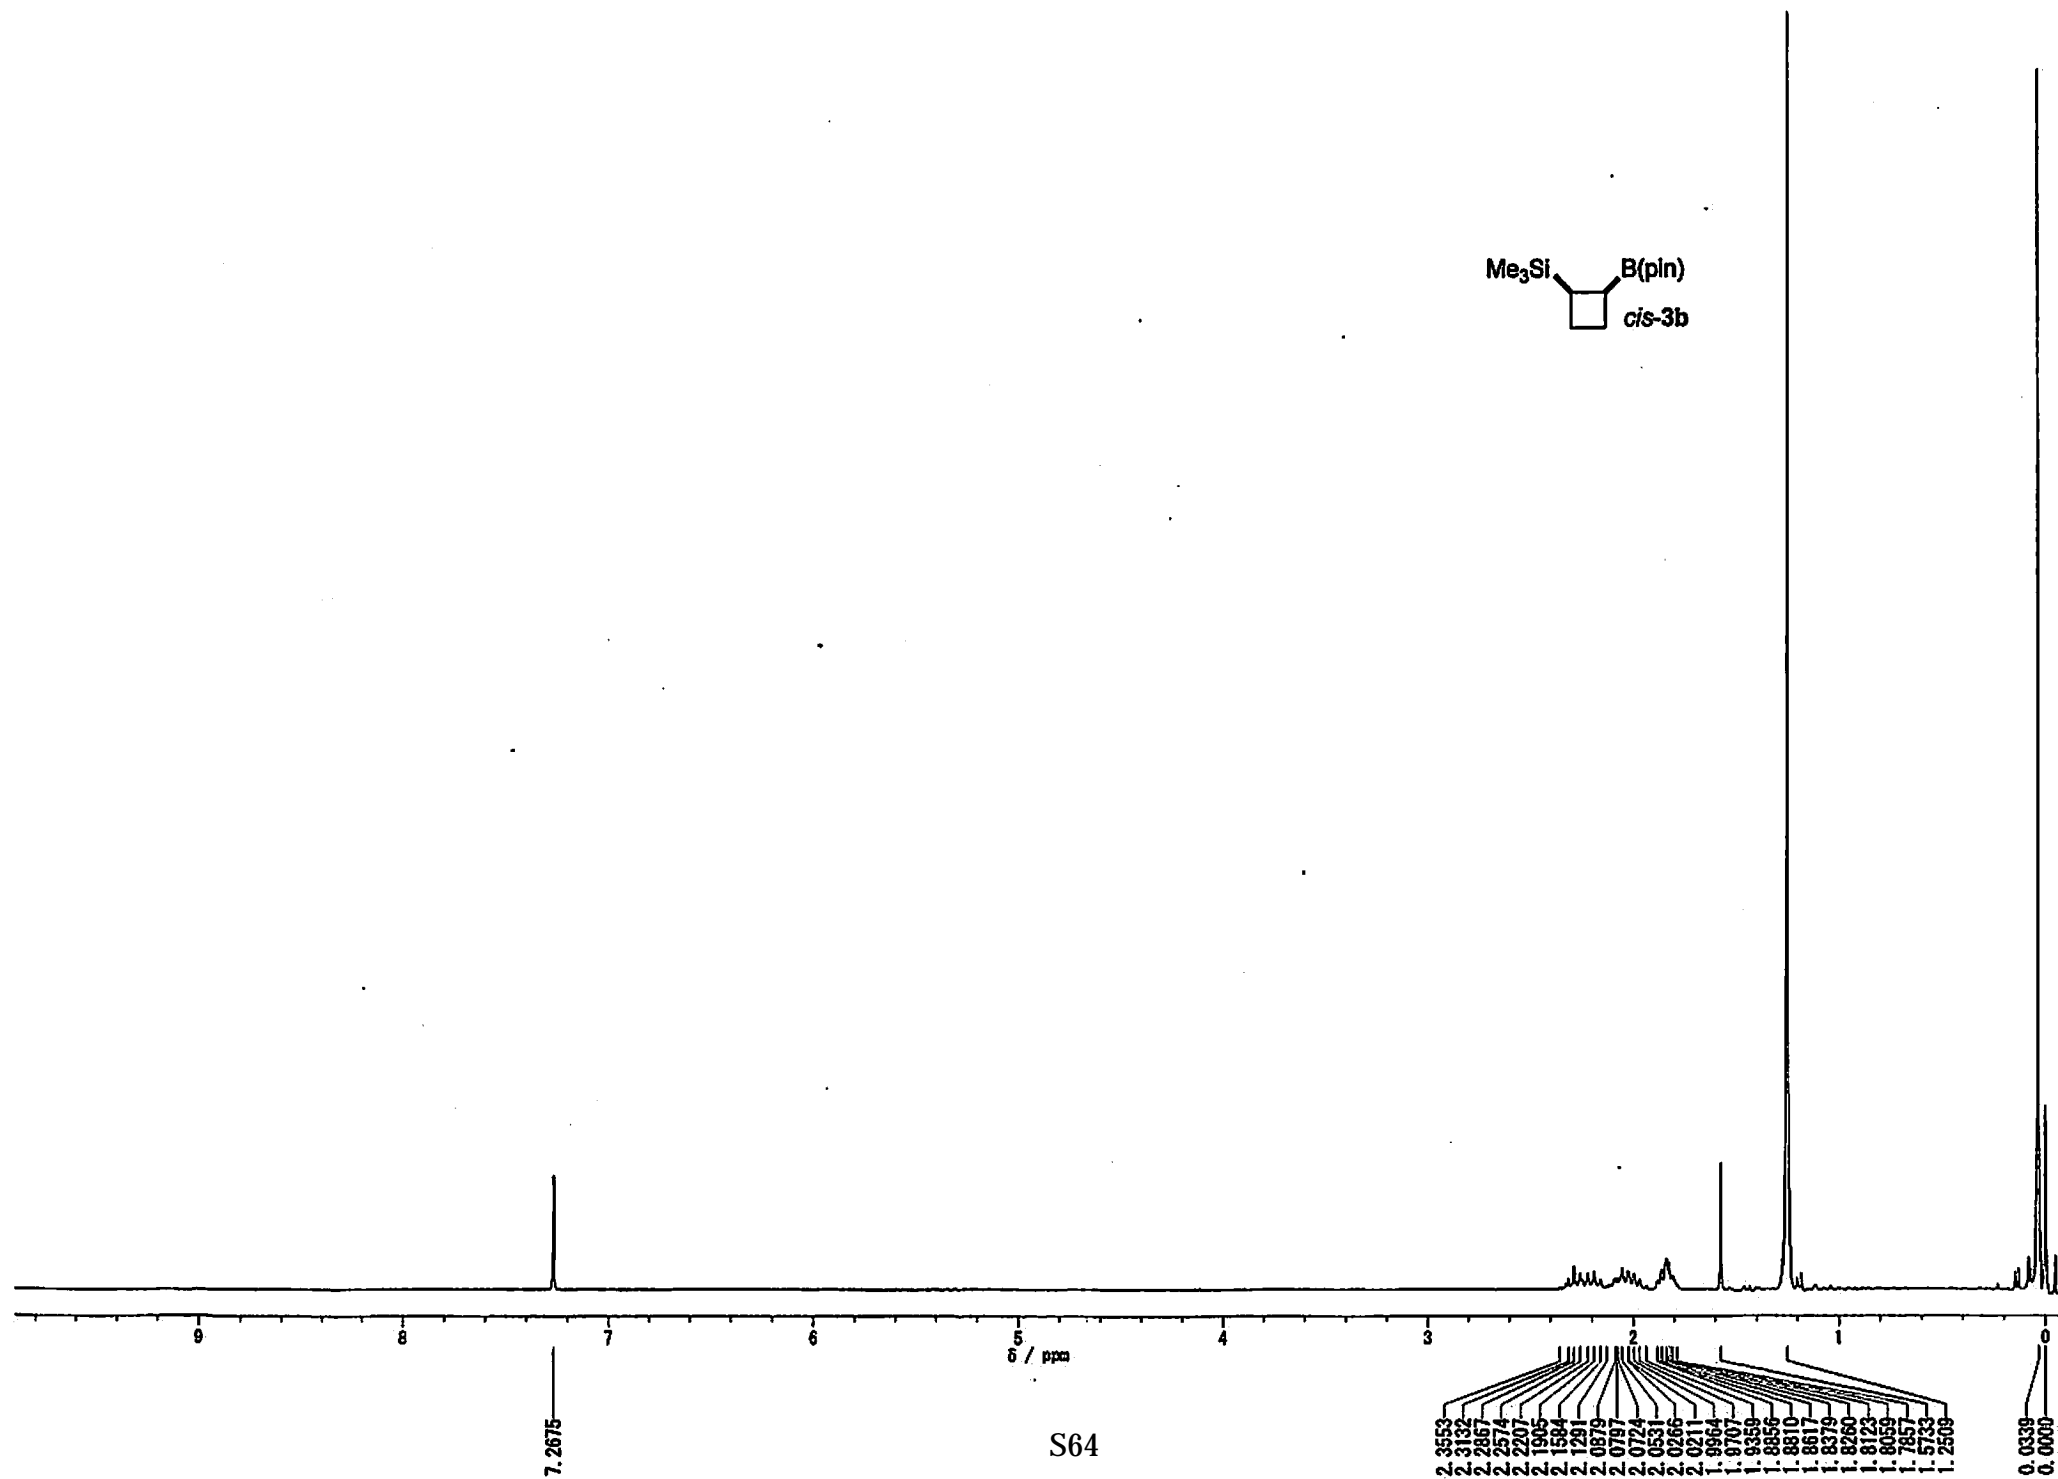



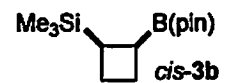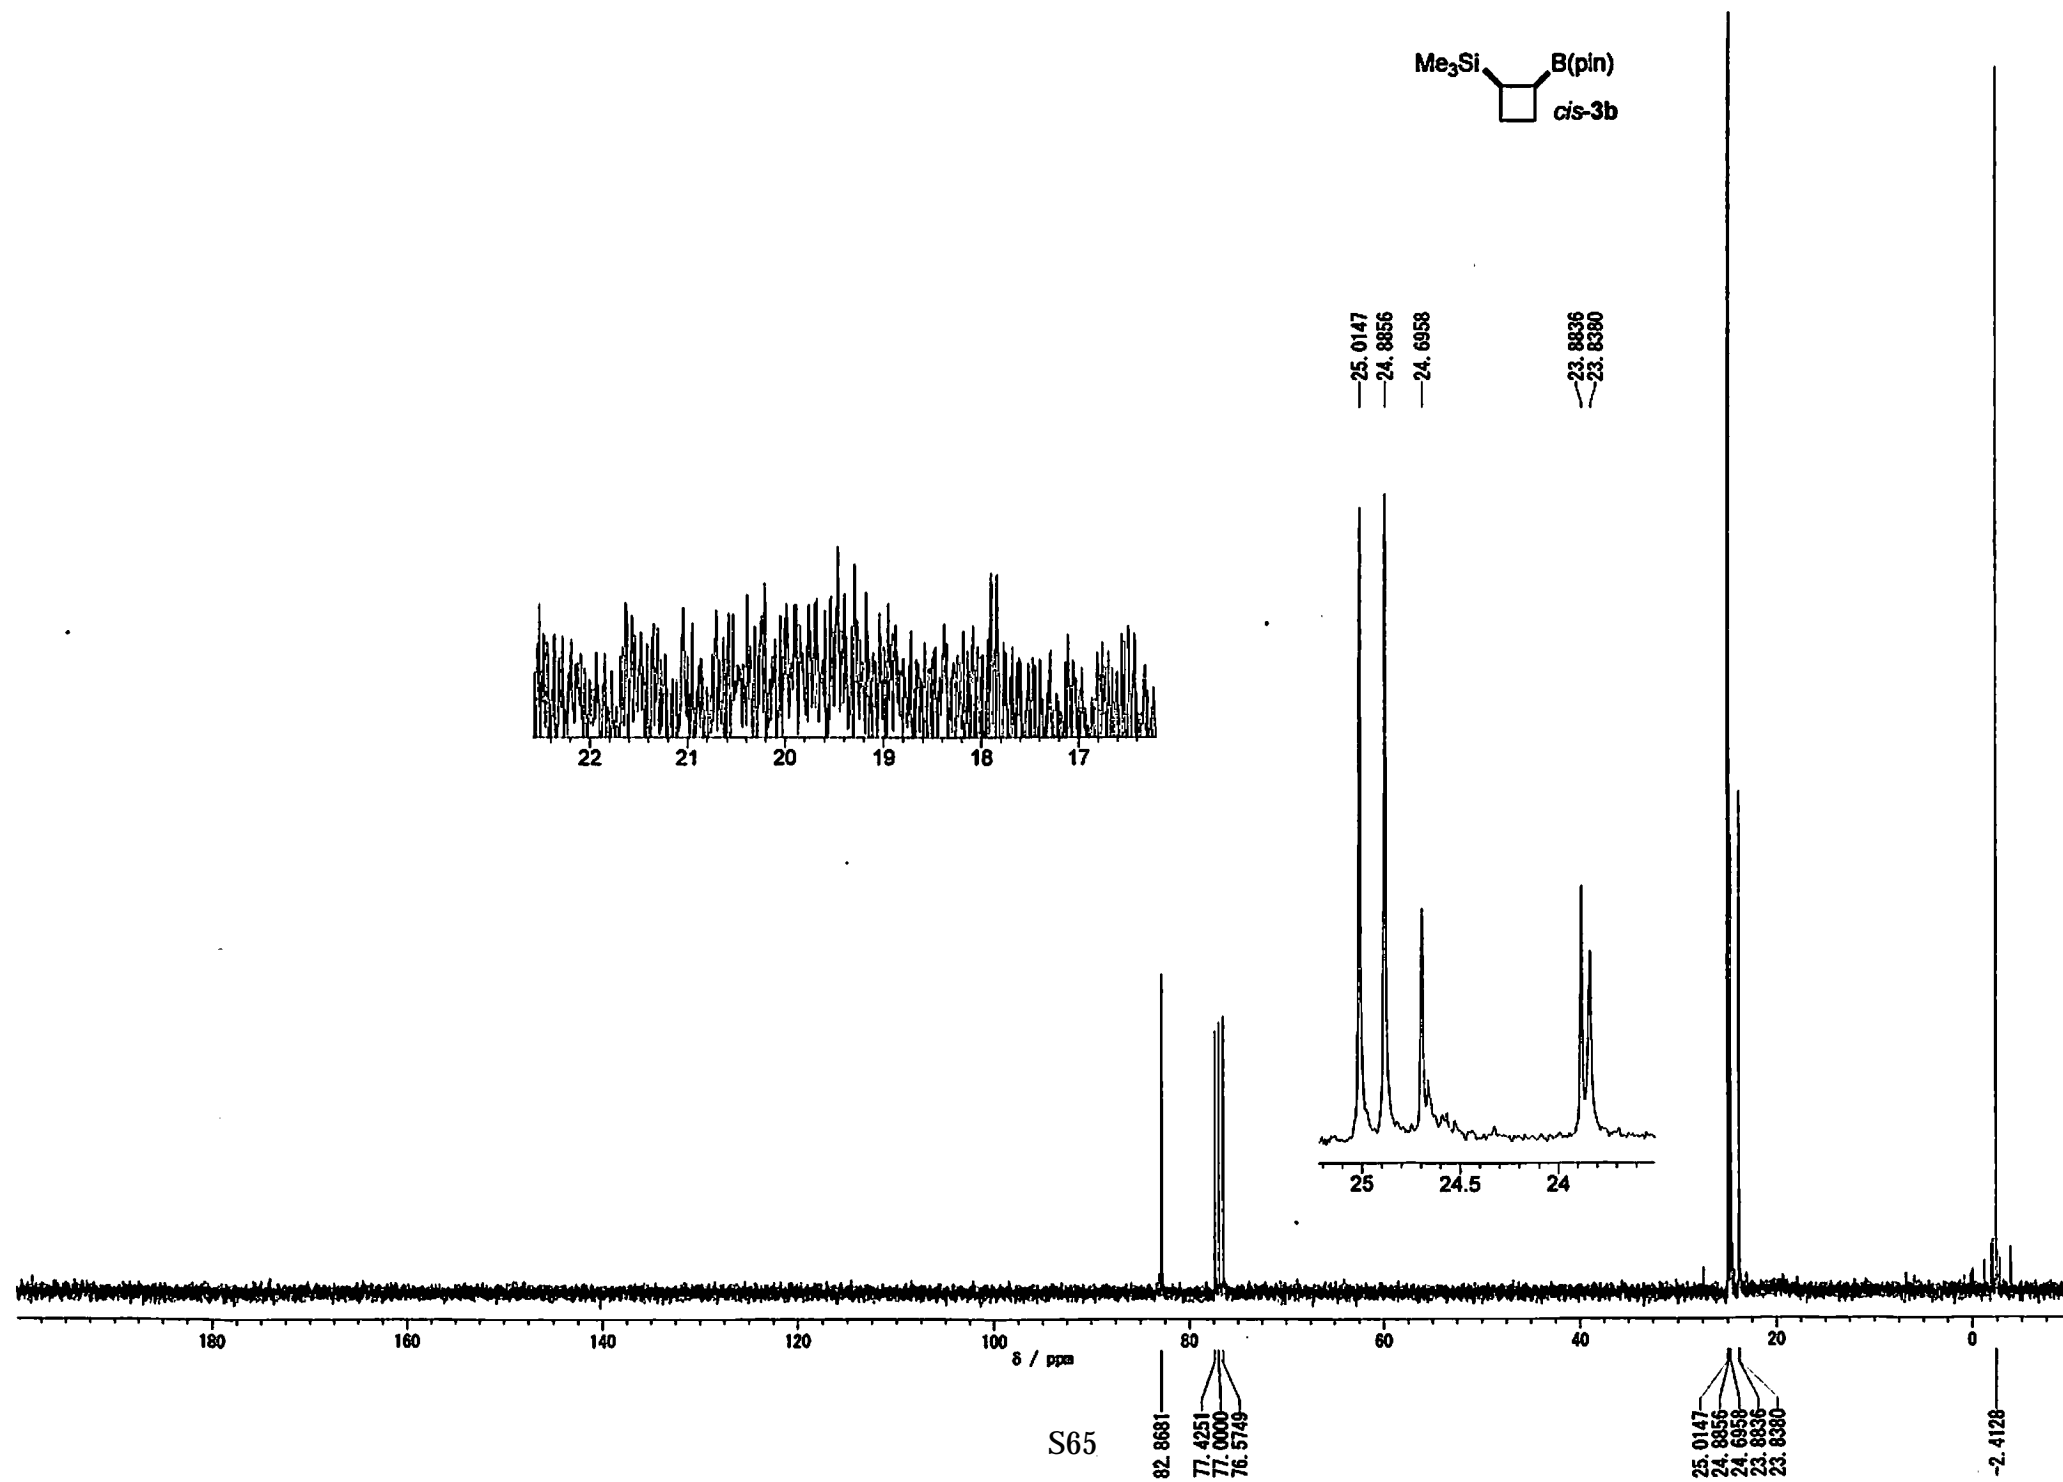

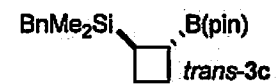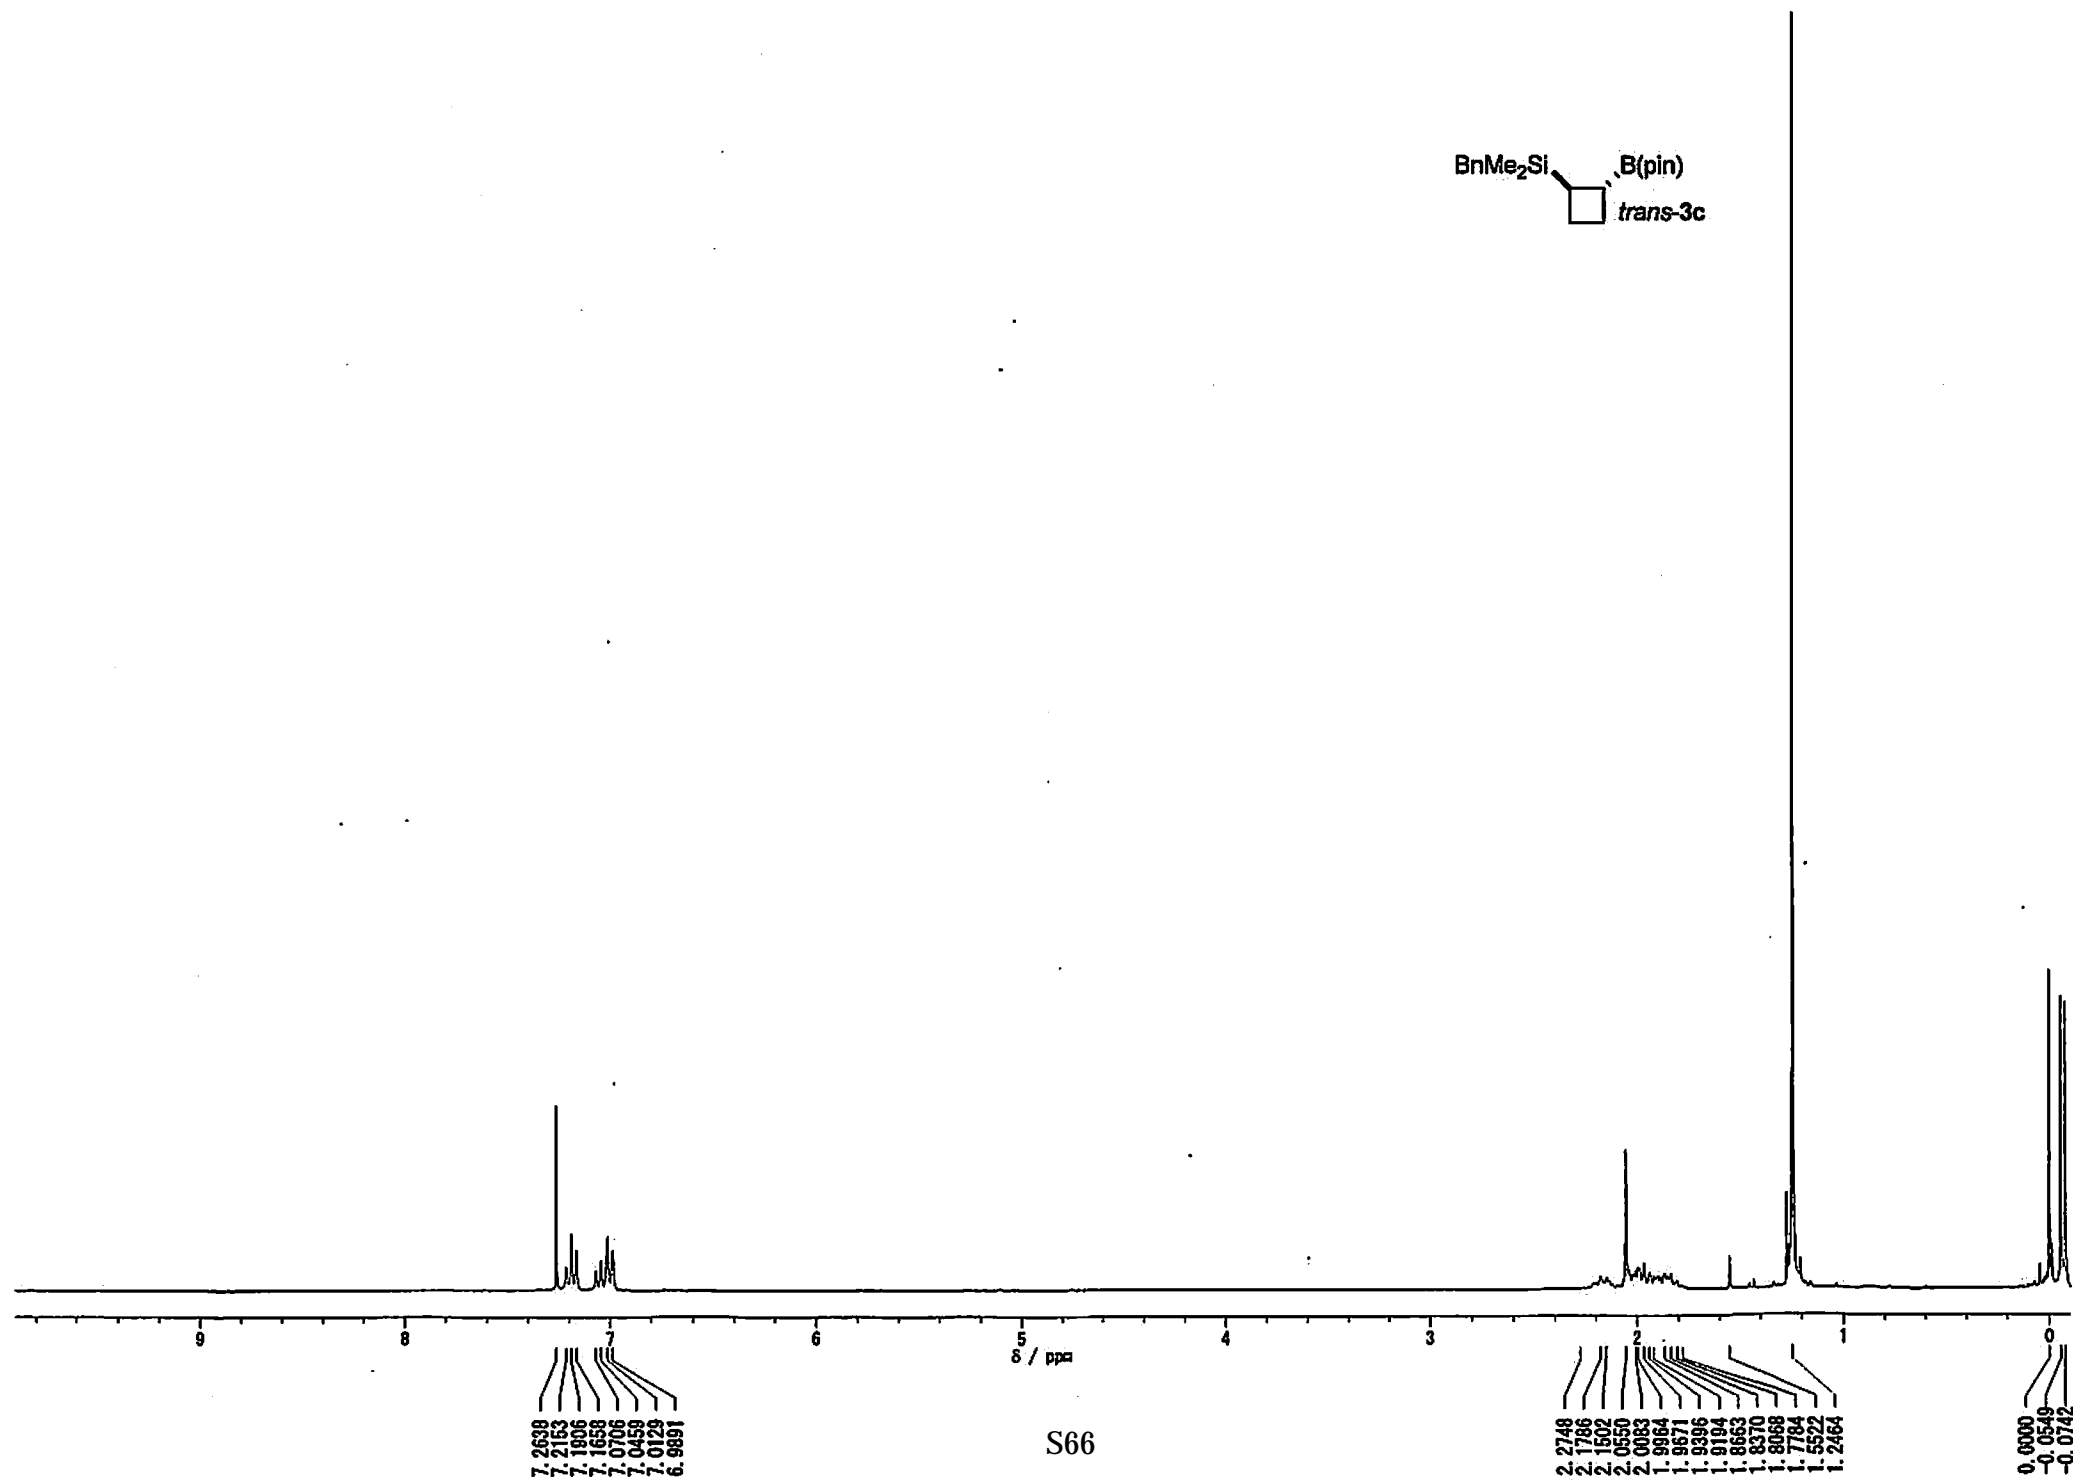

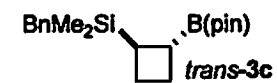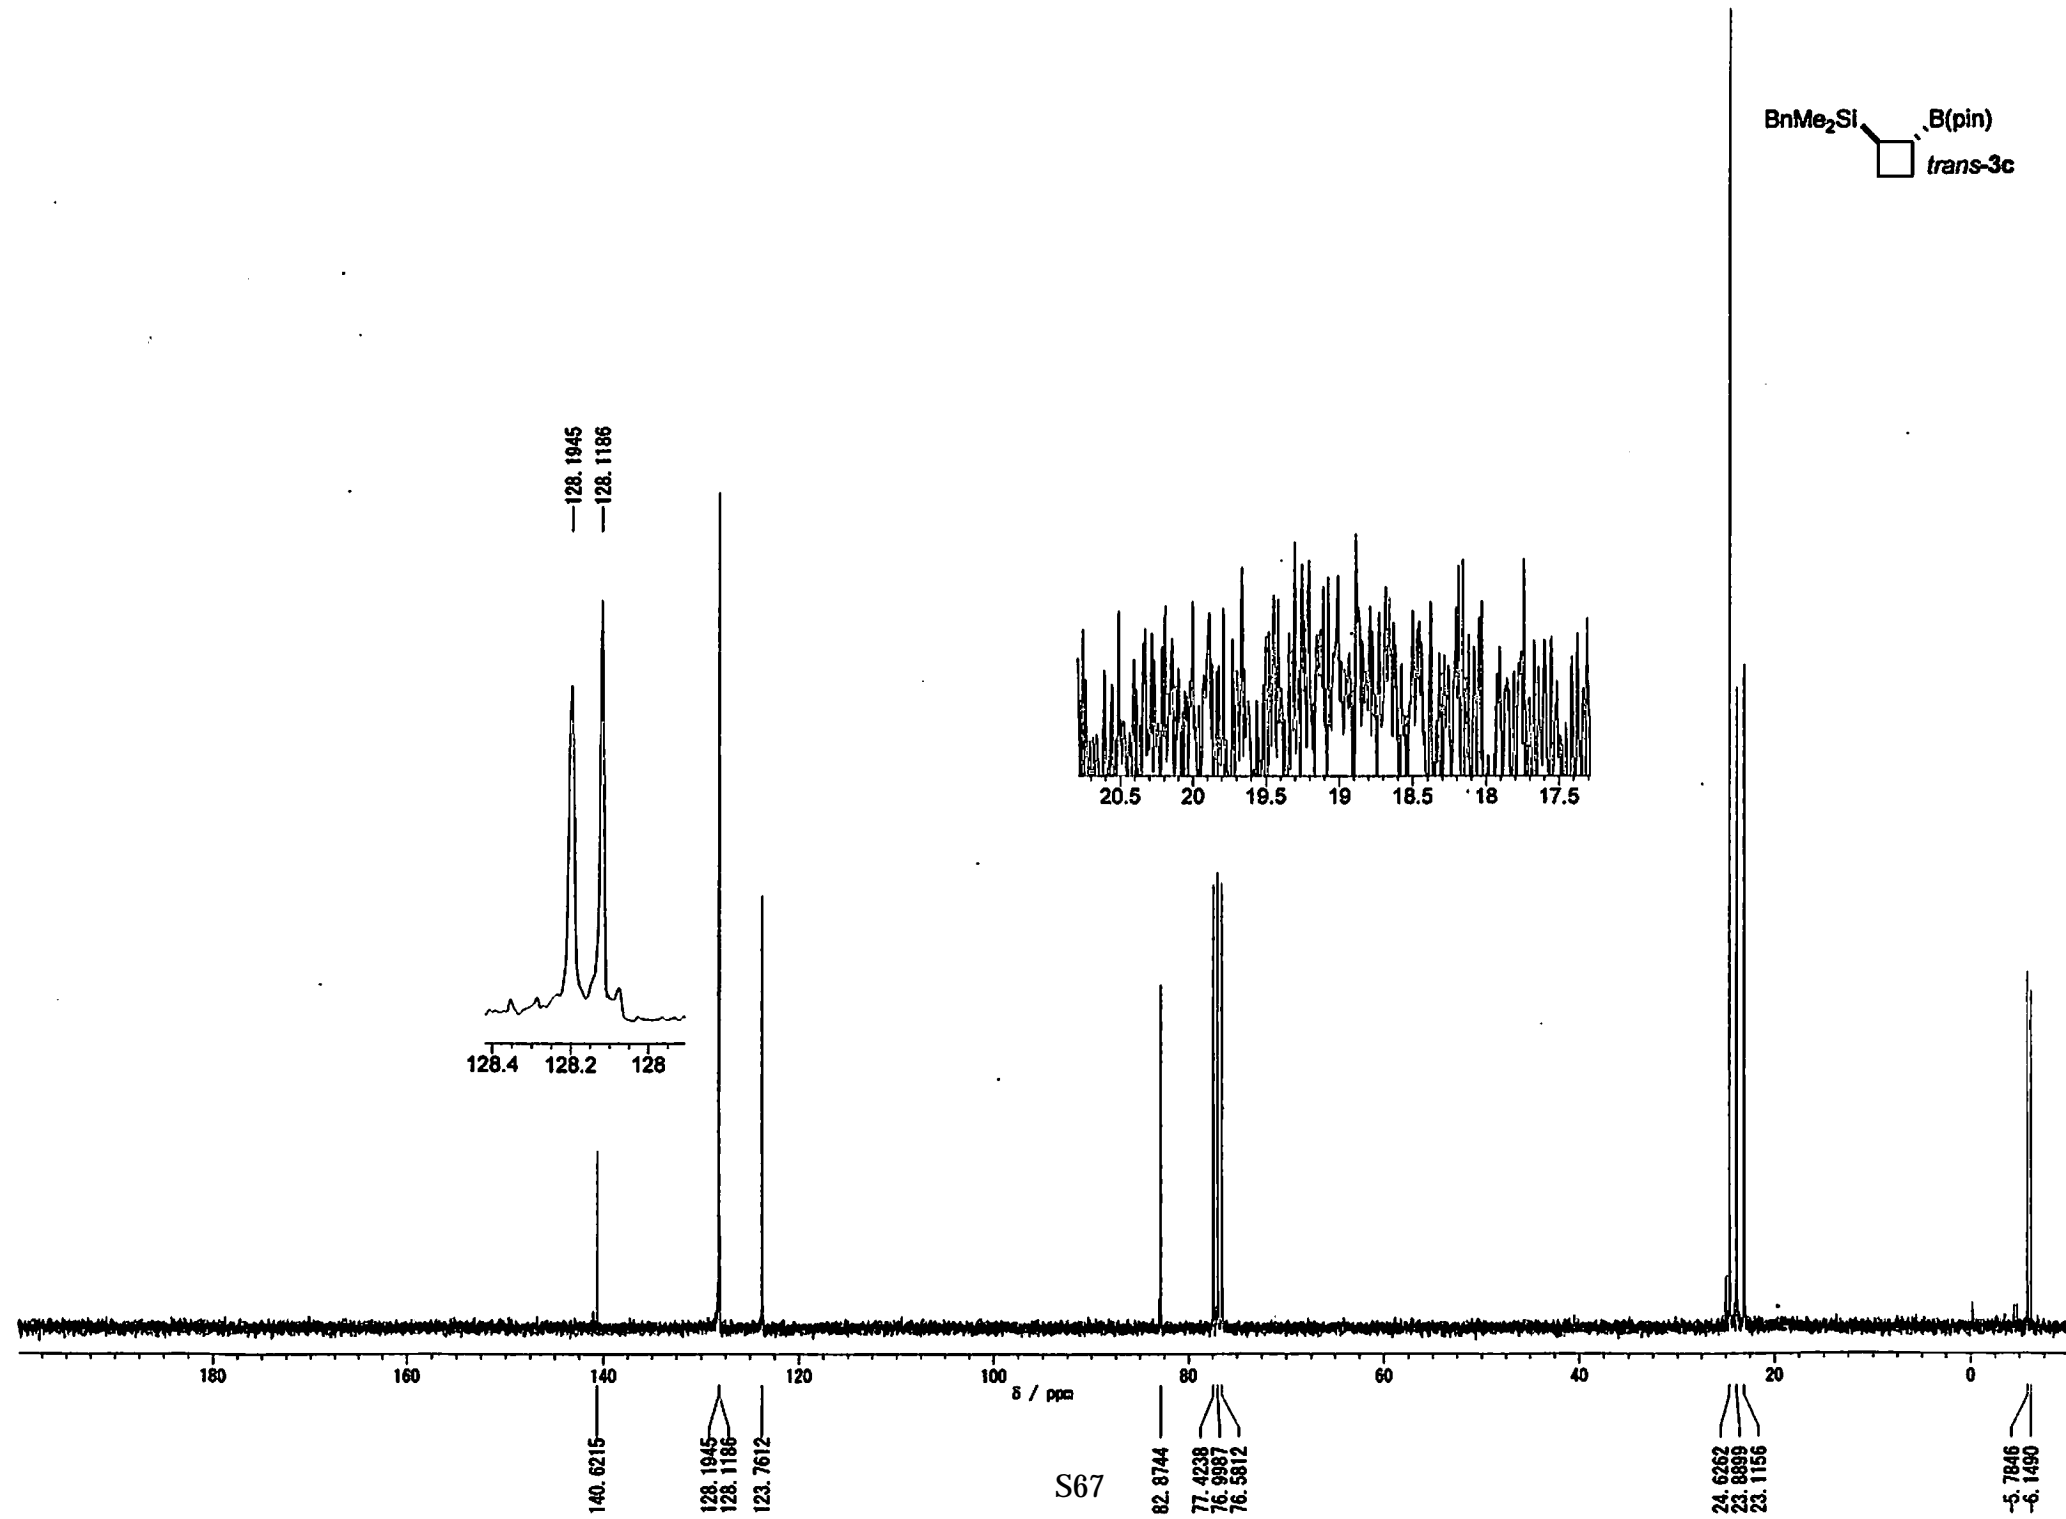

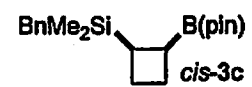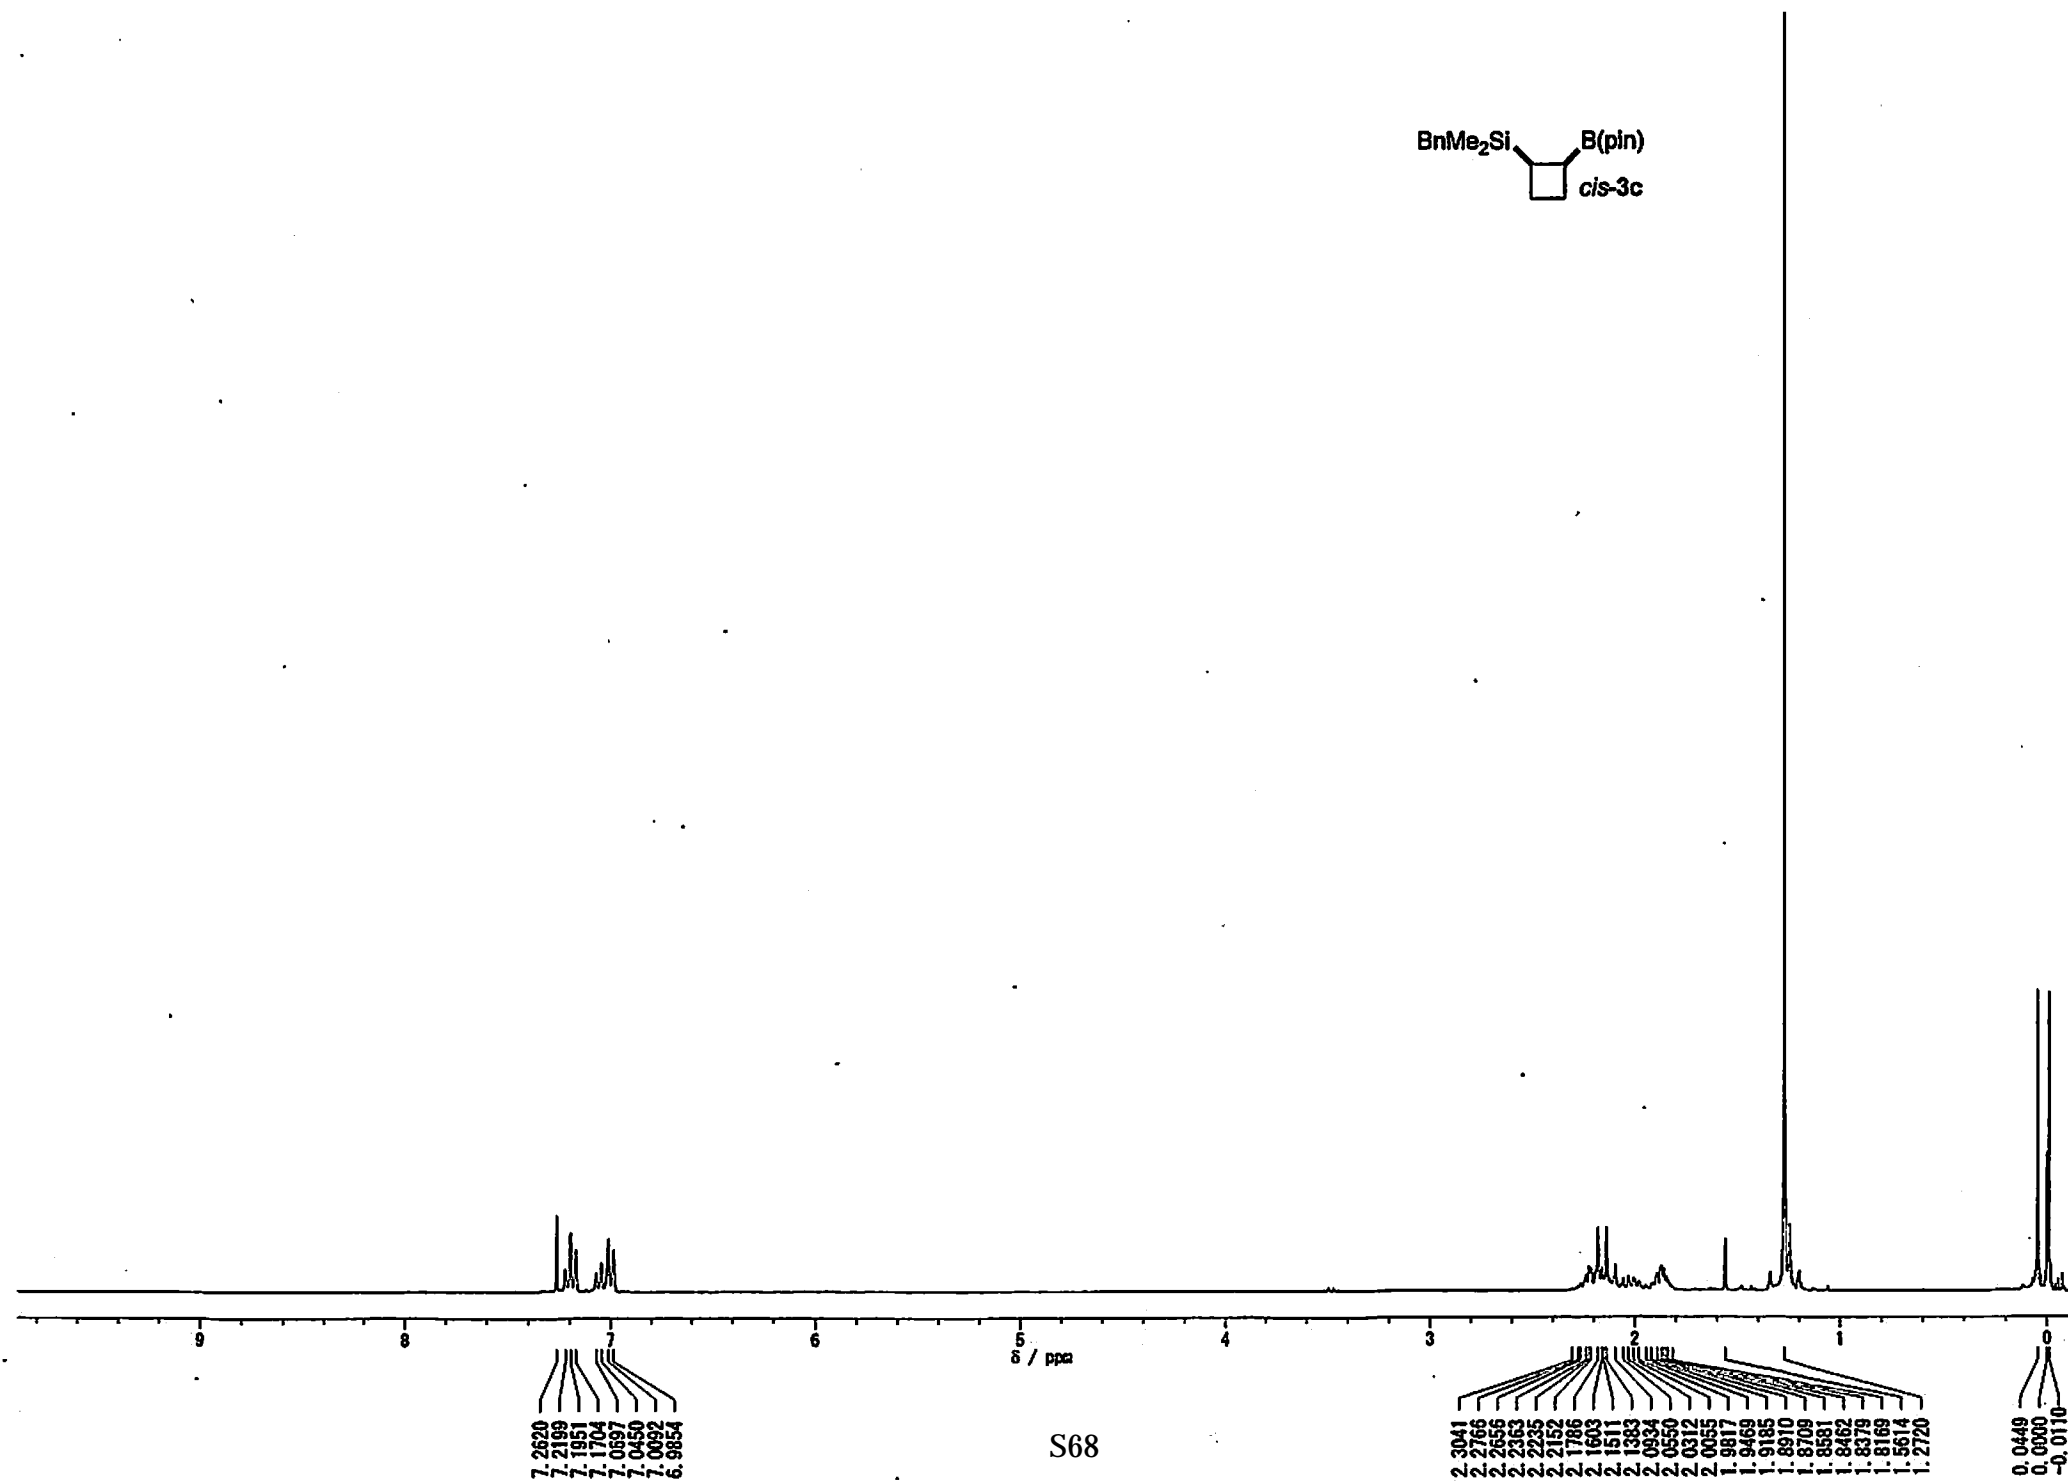

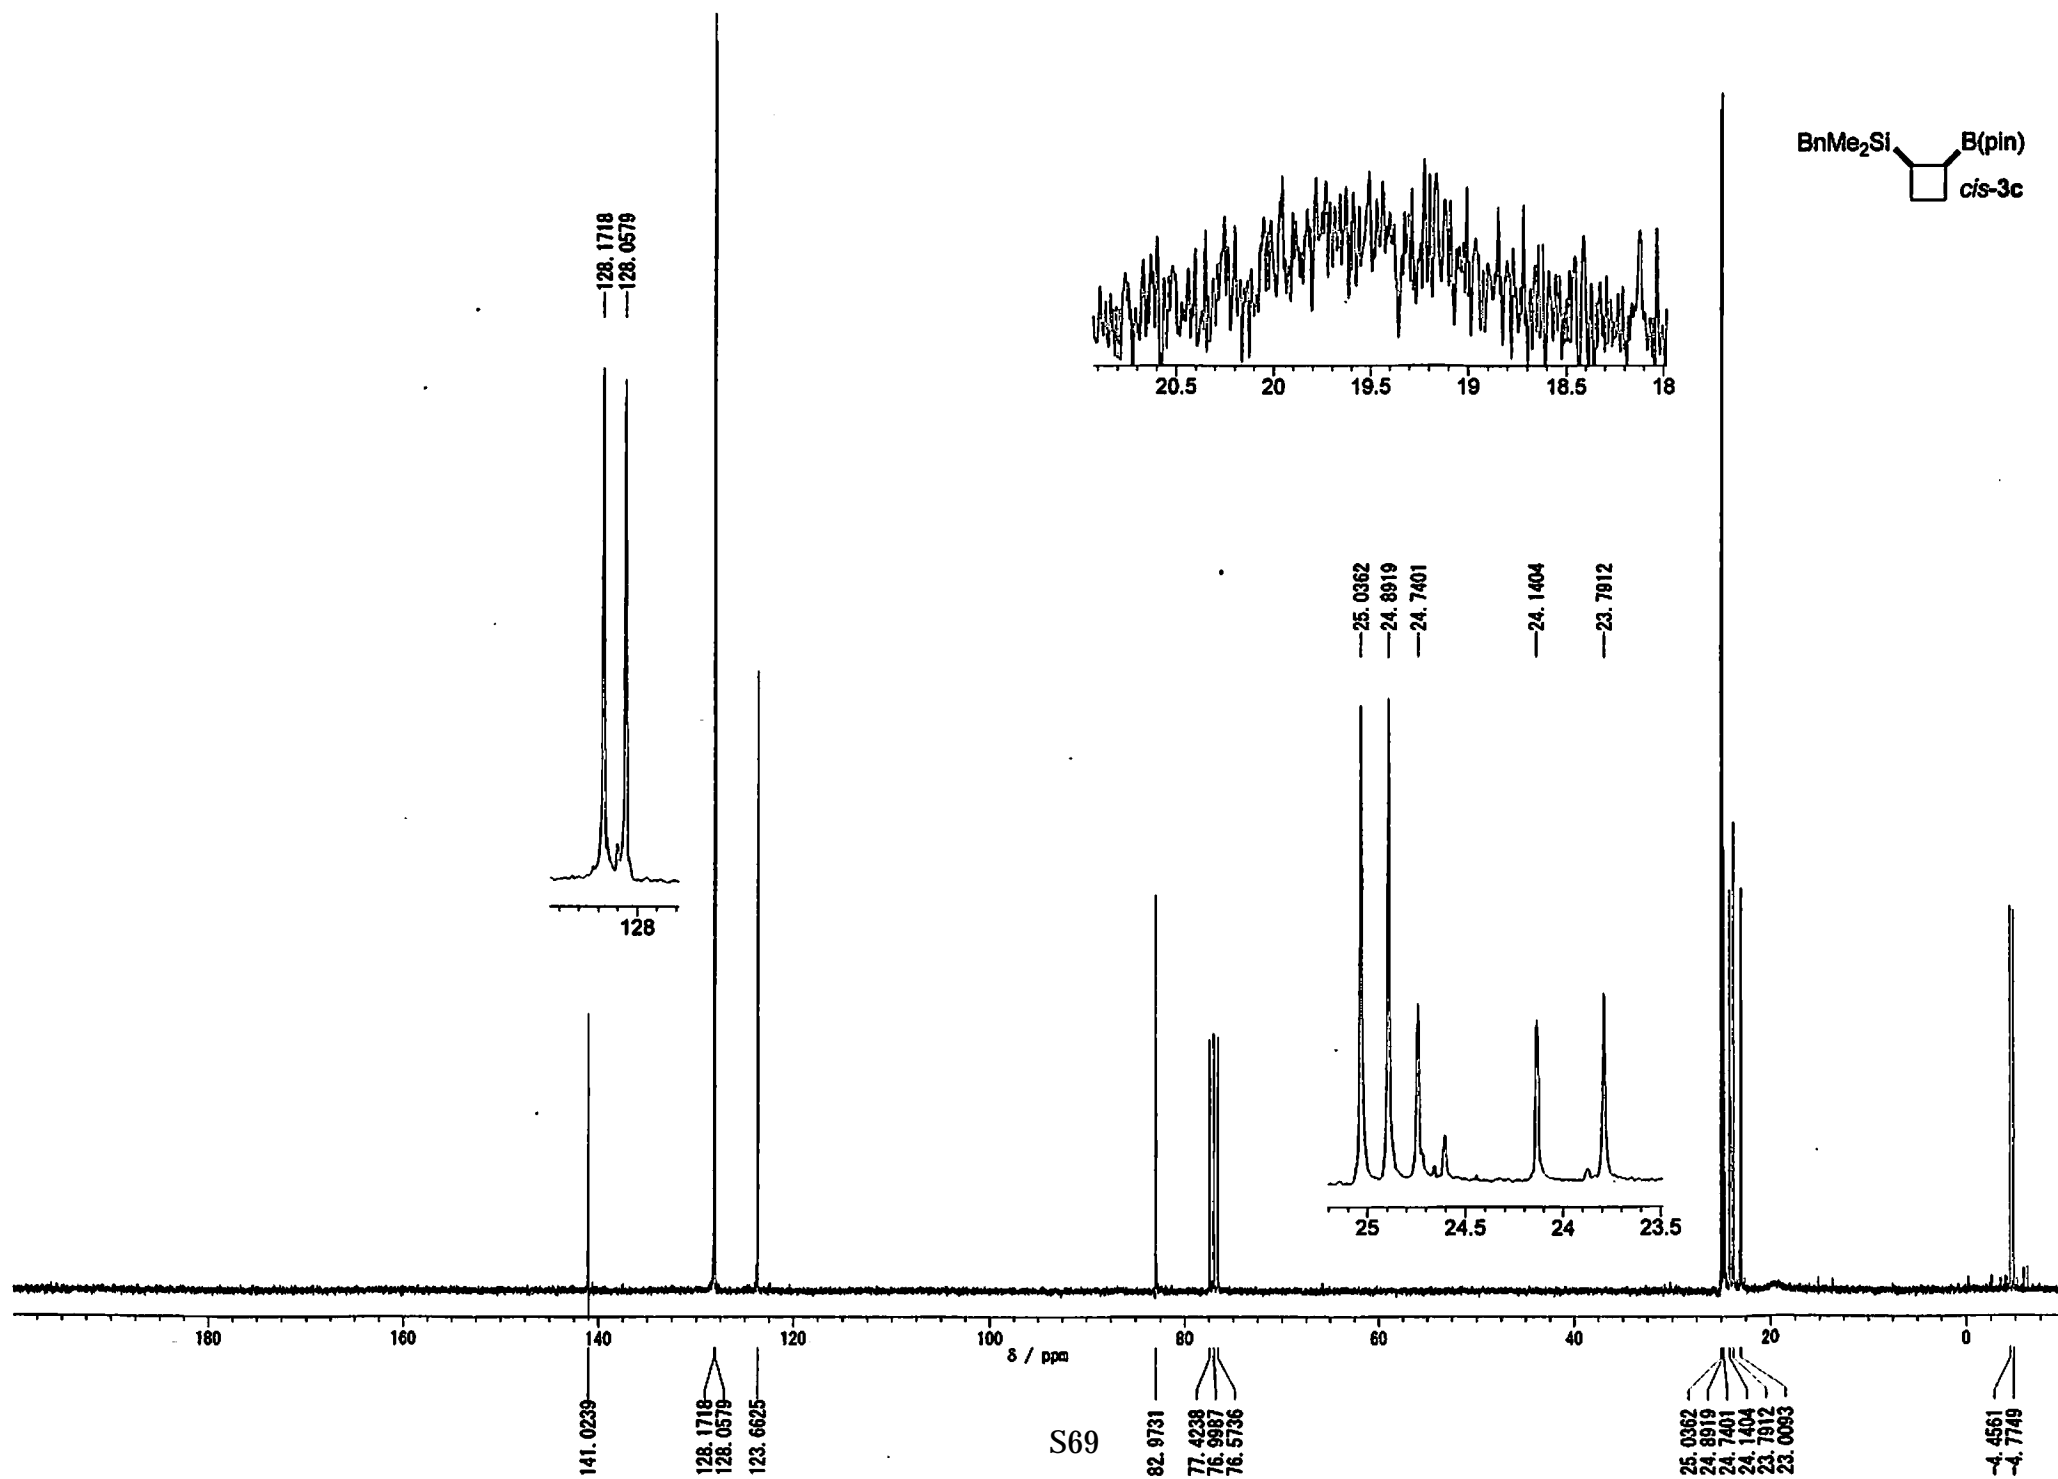

S69

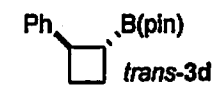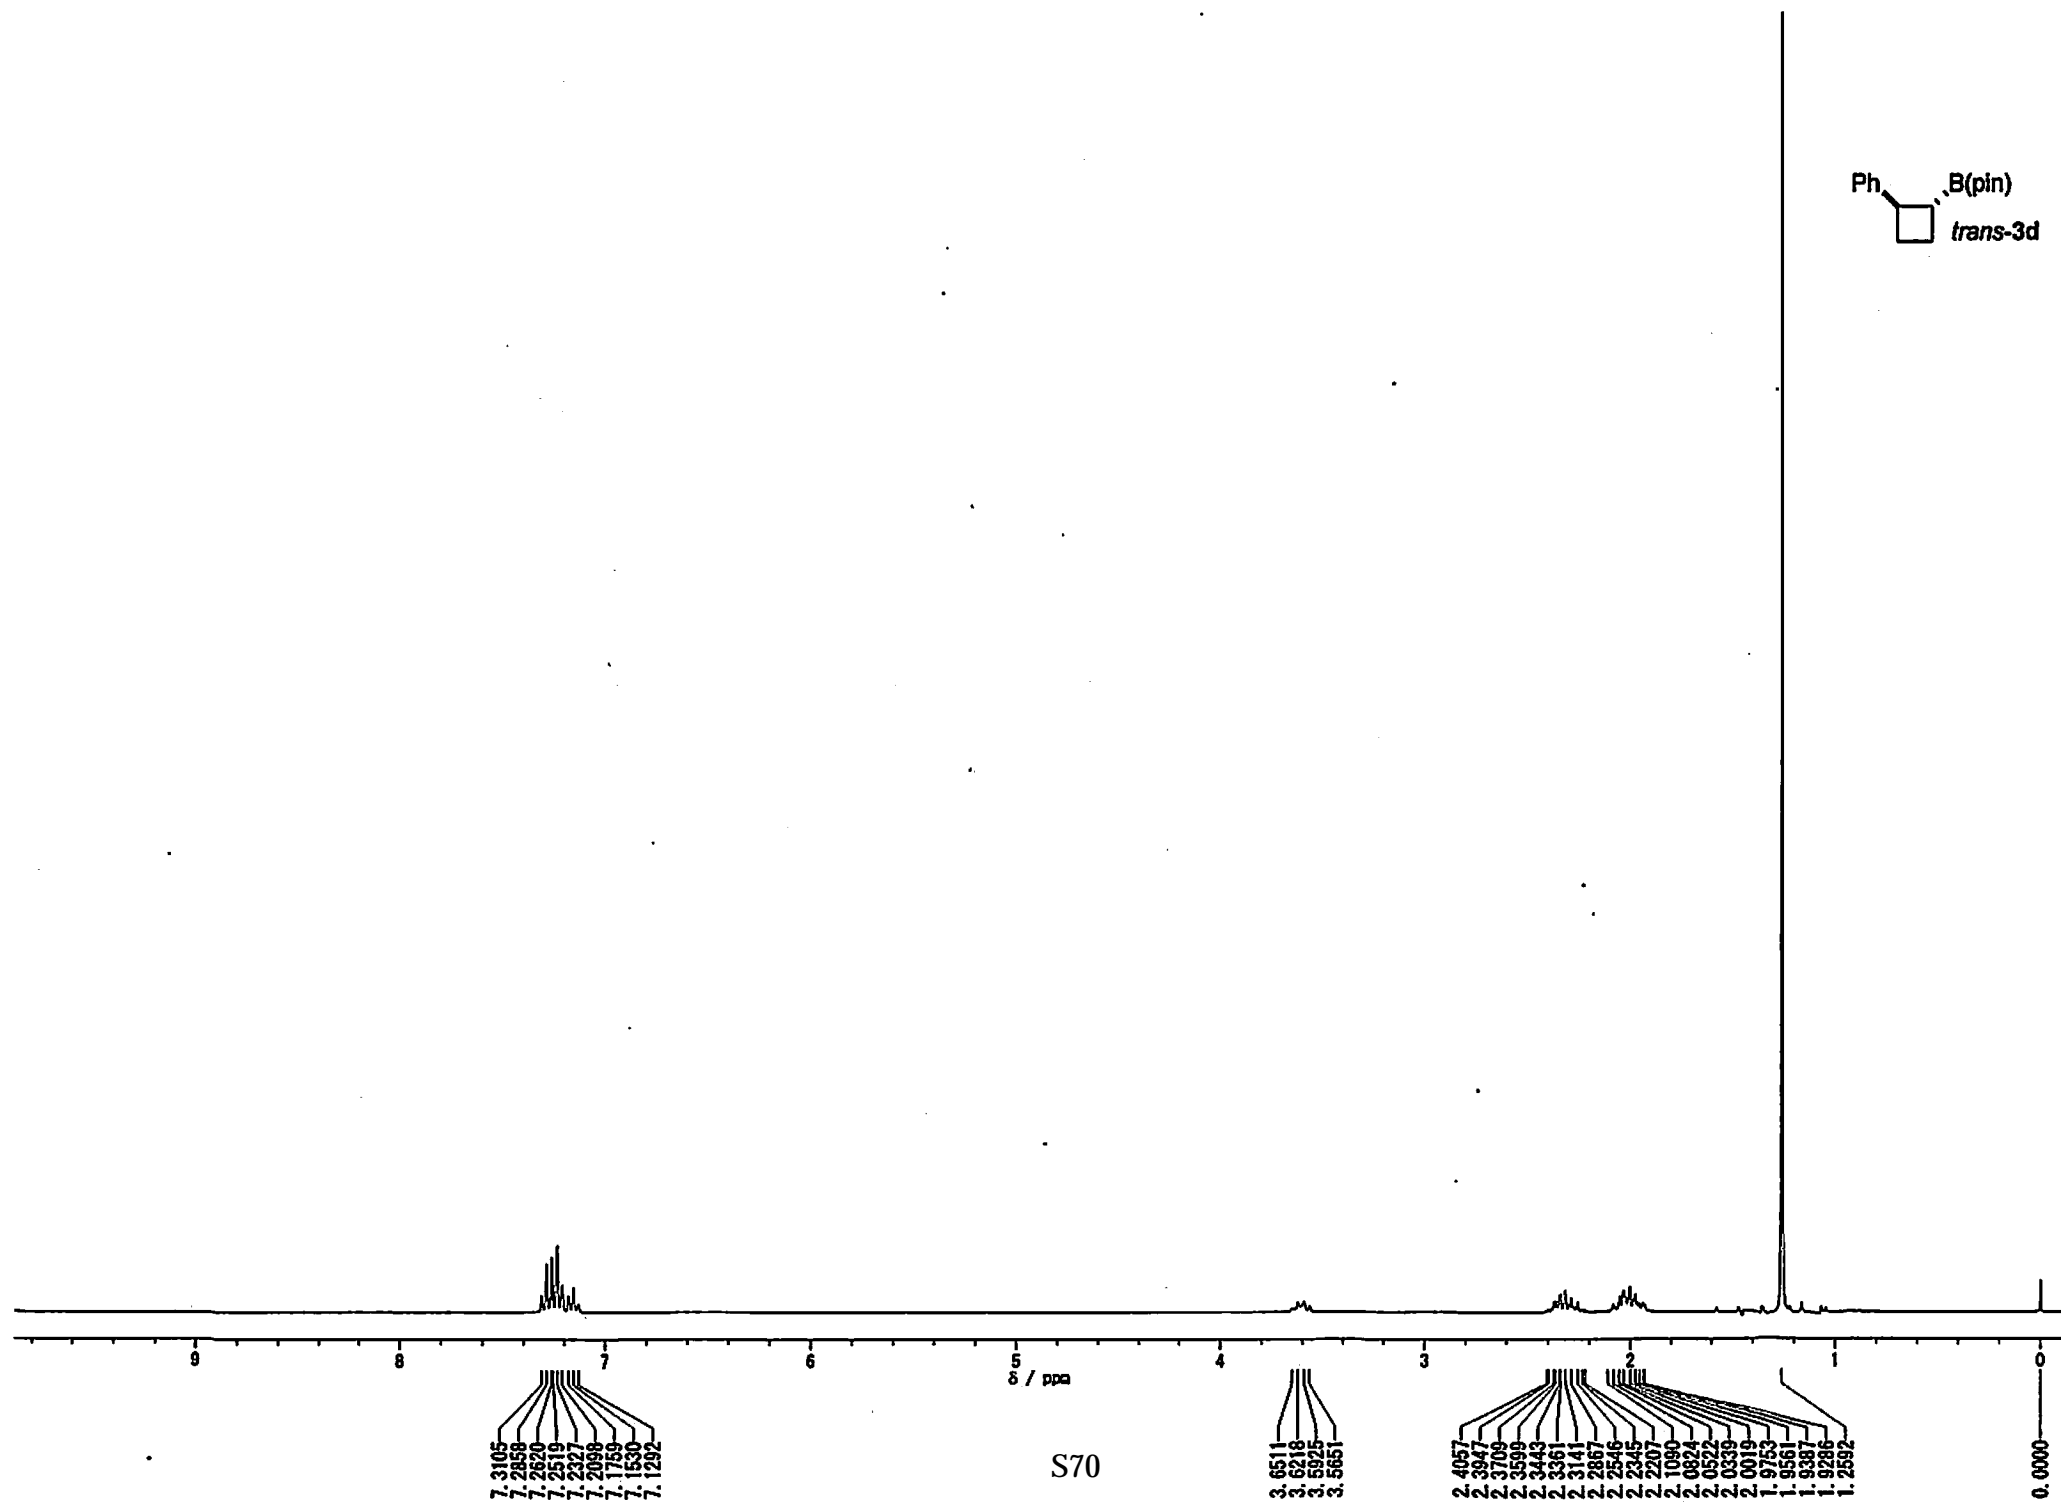

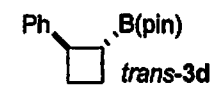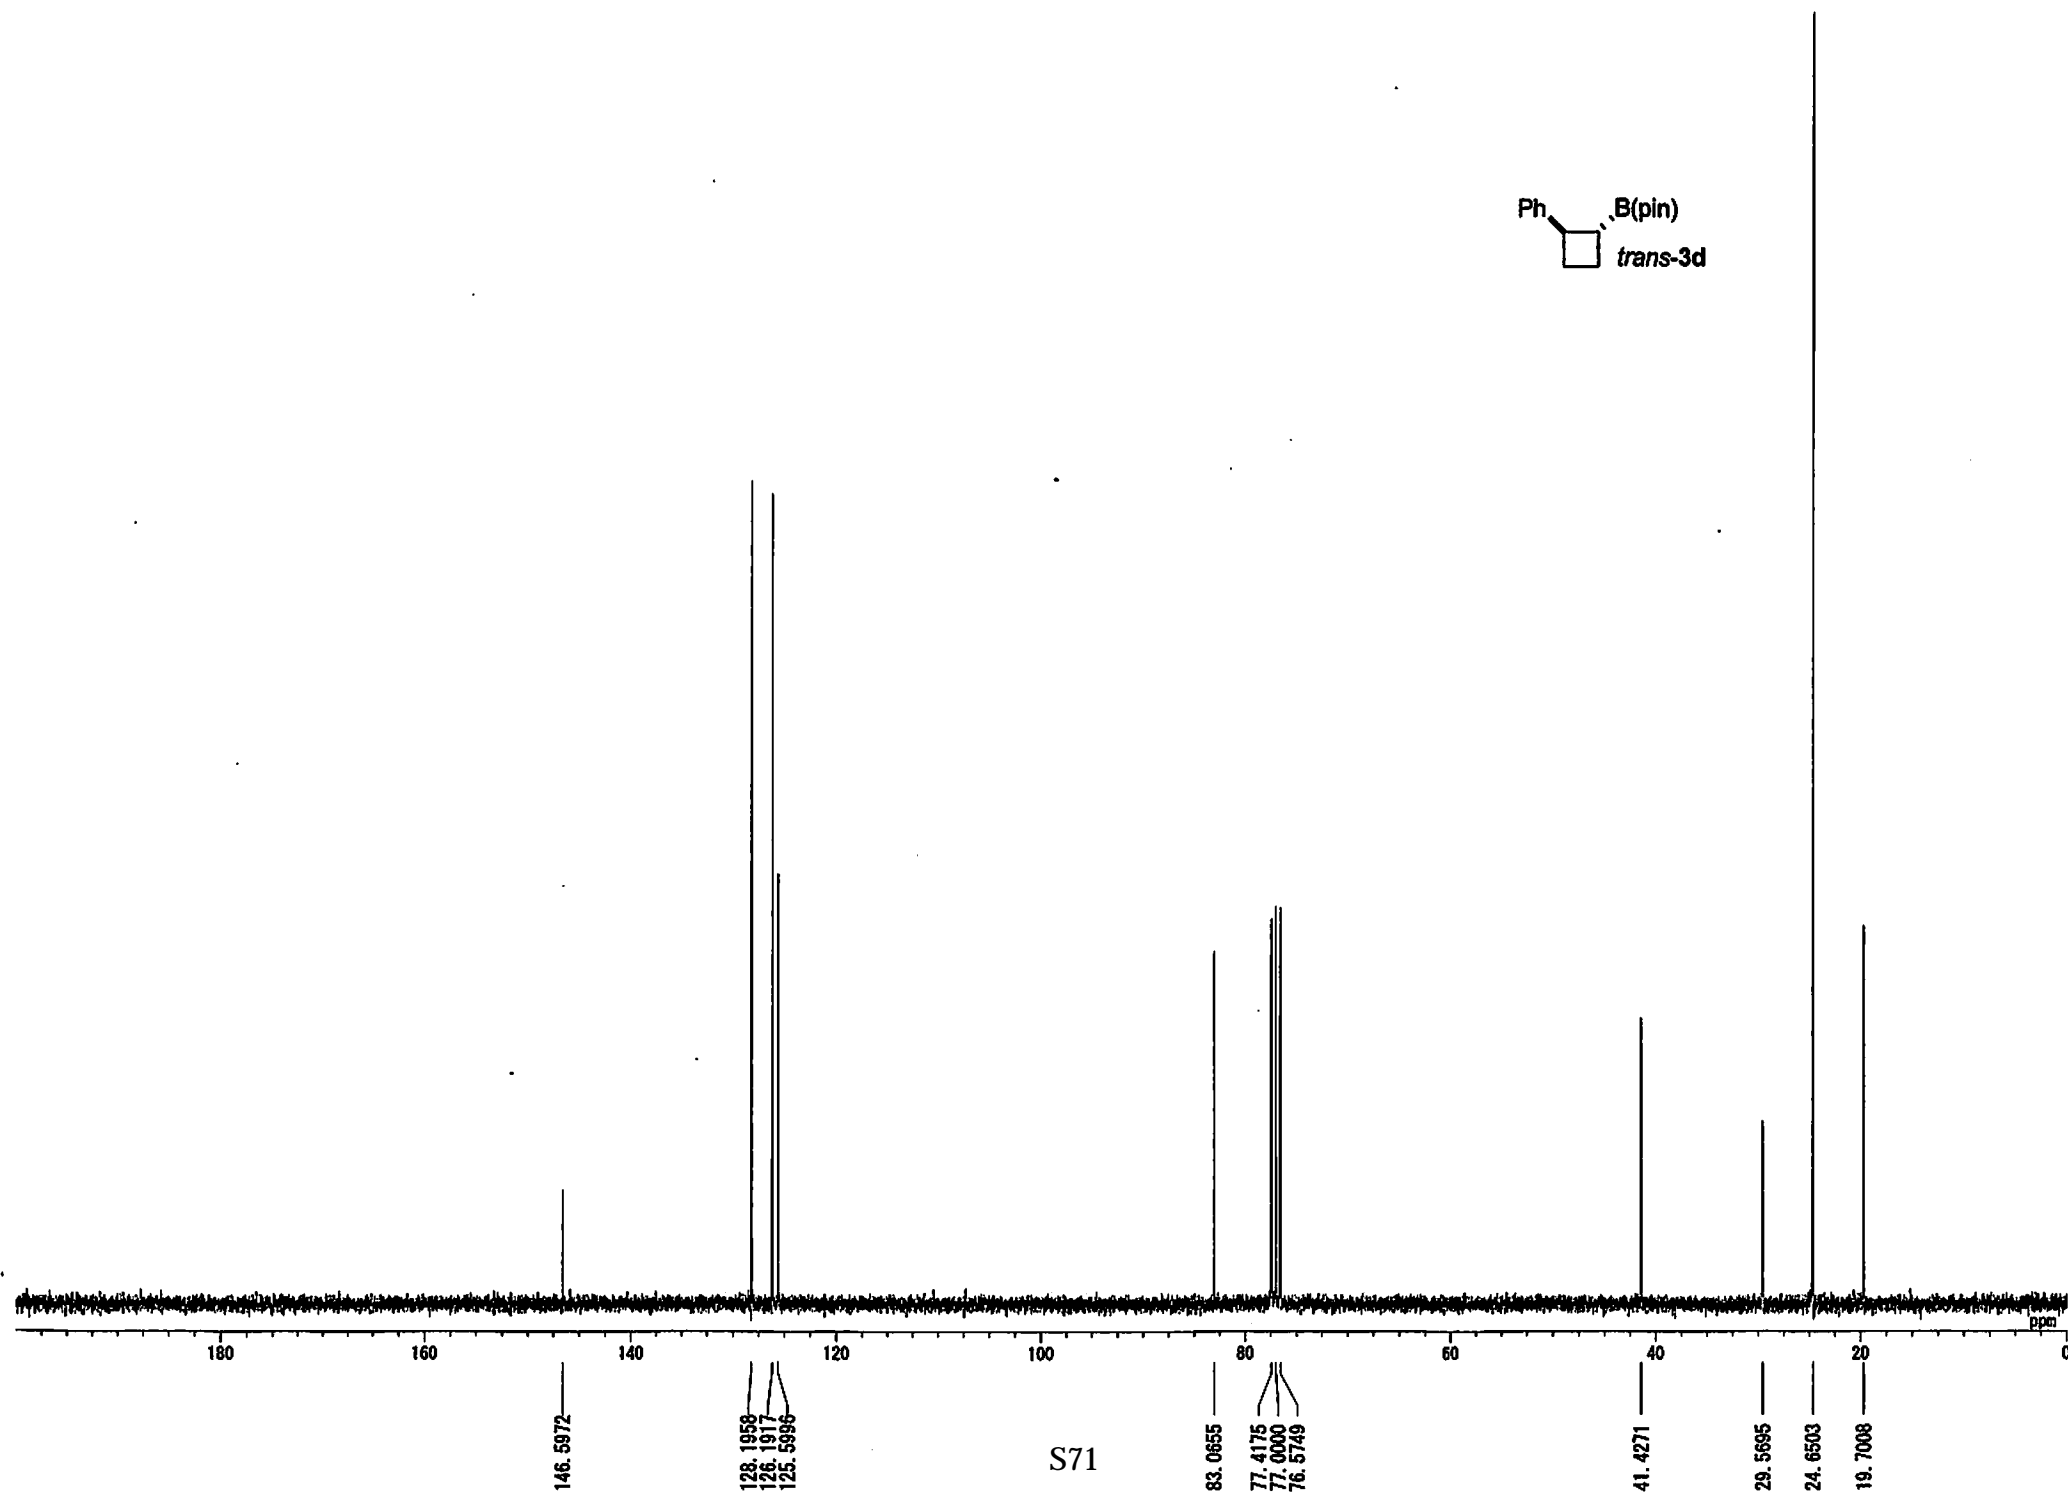

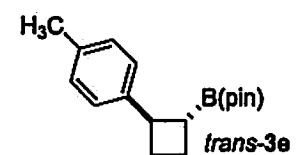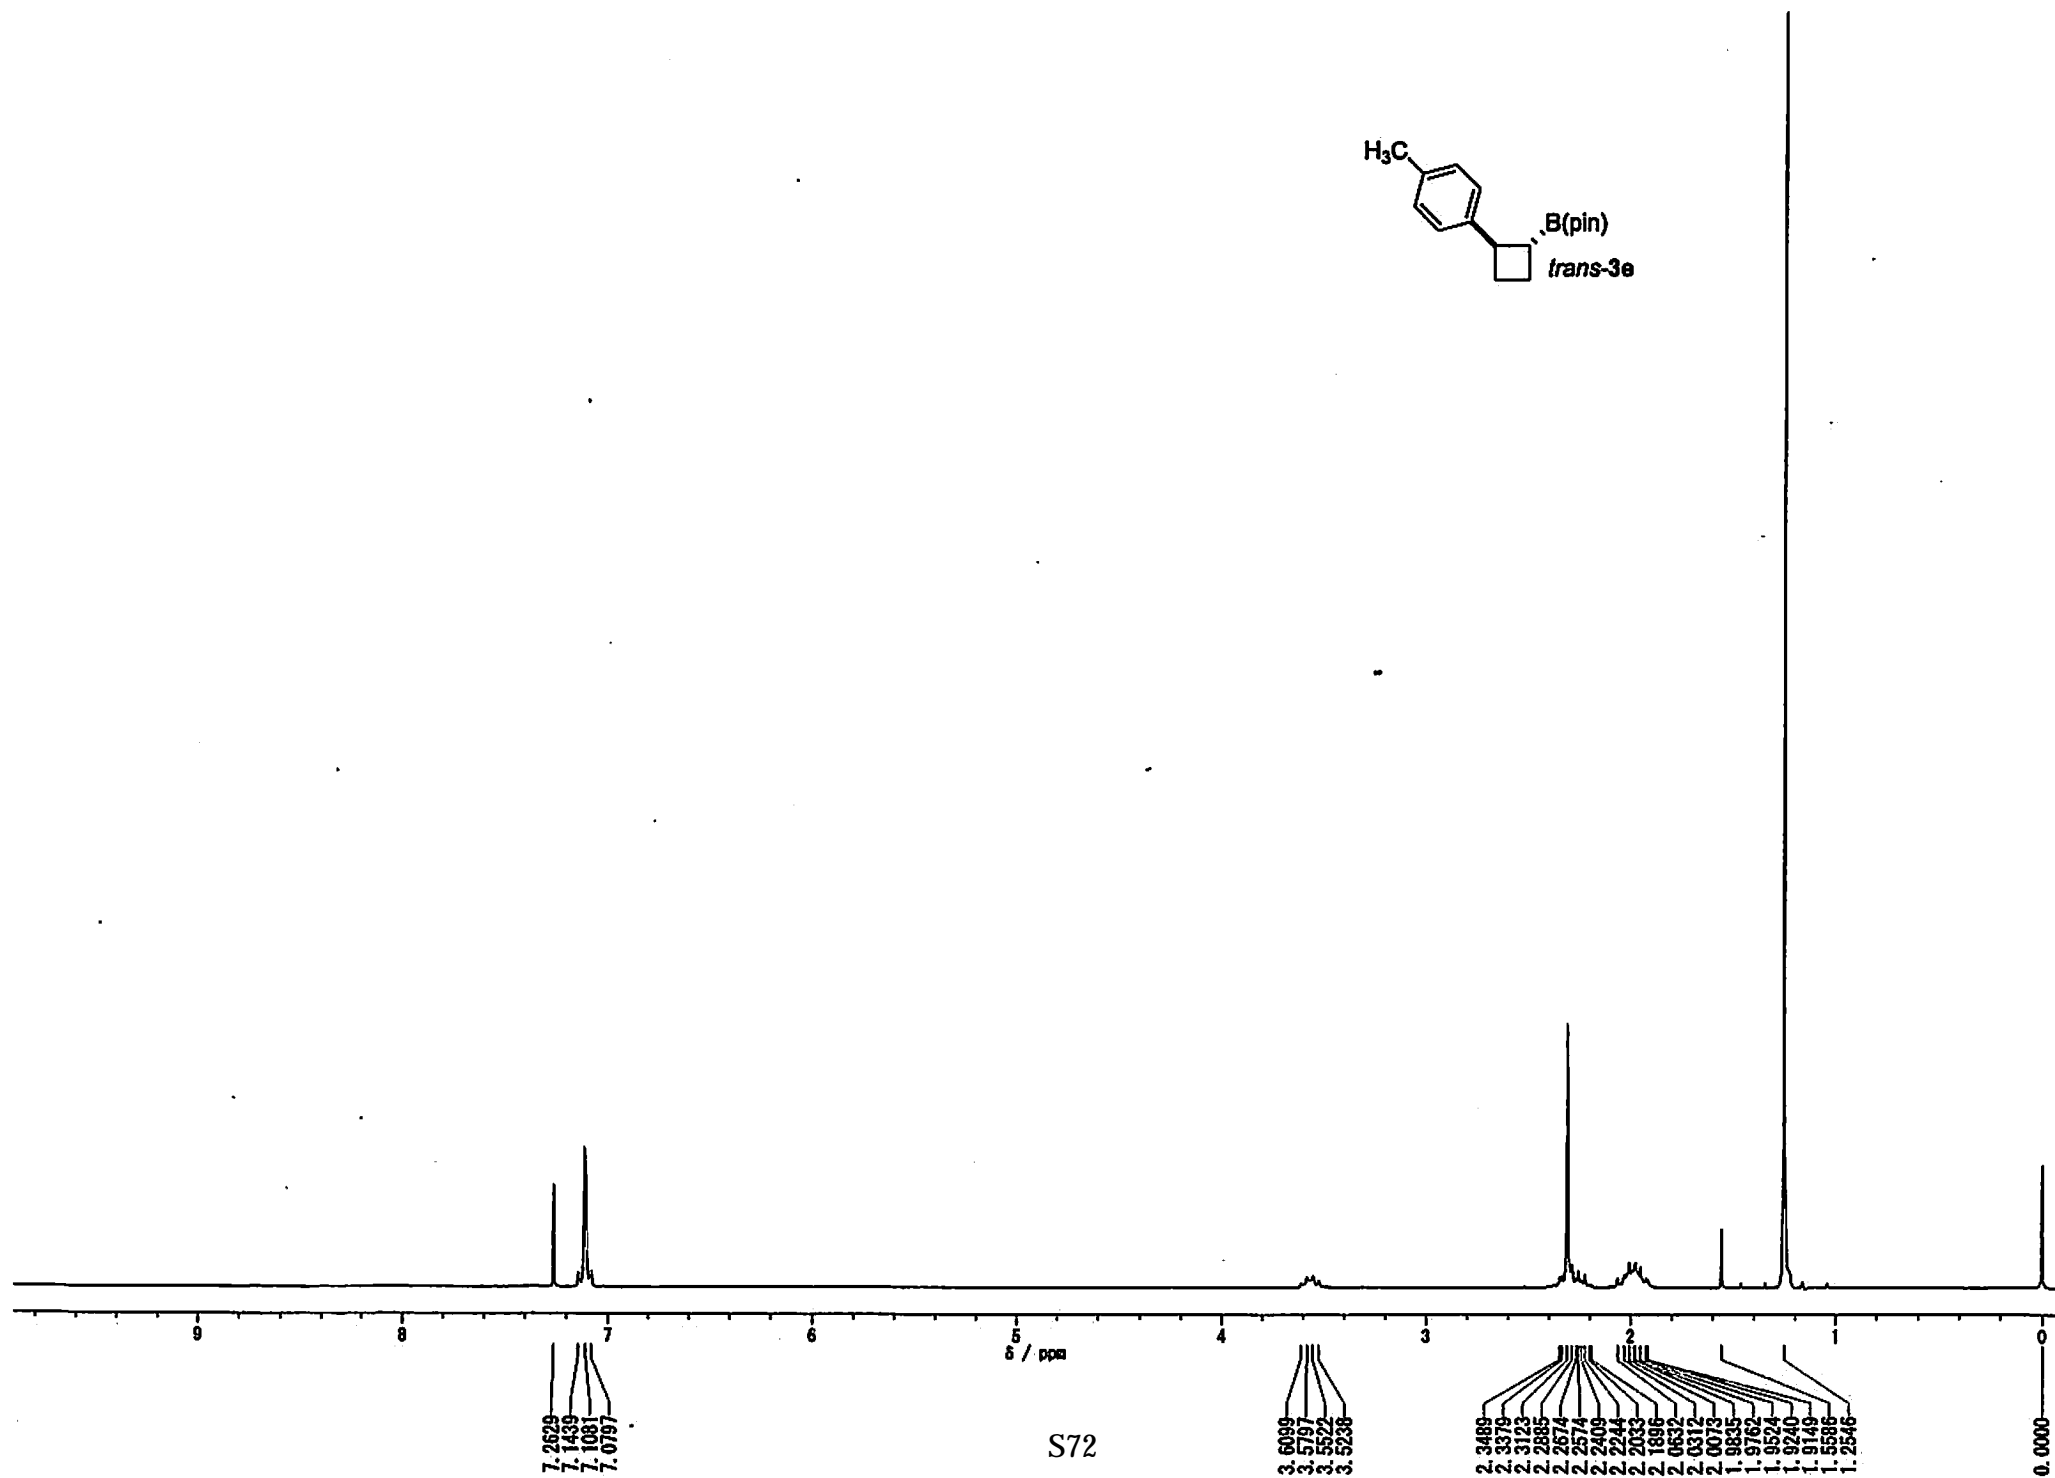



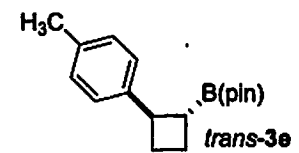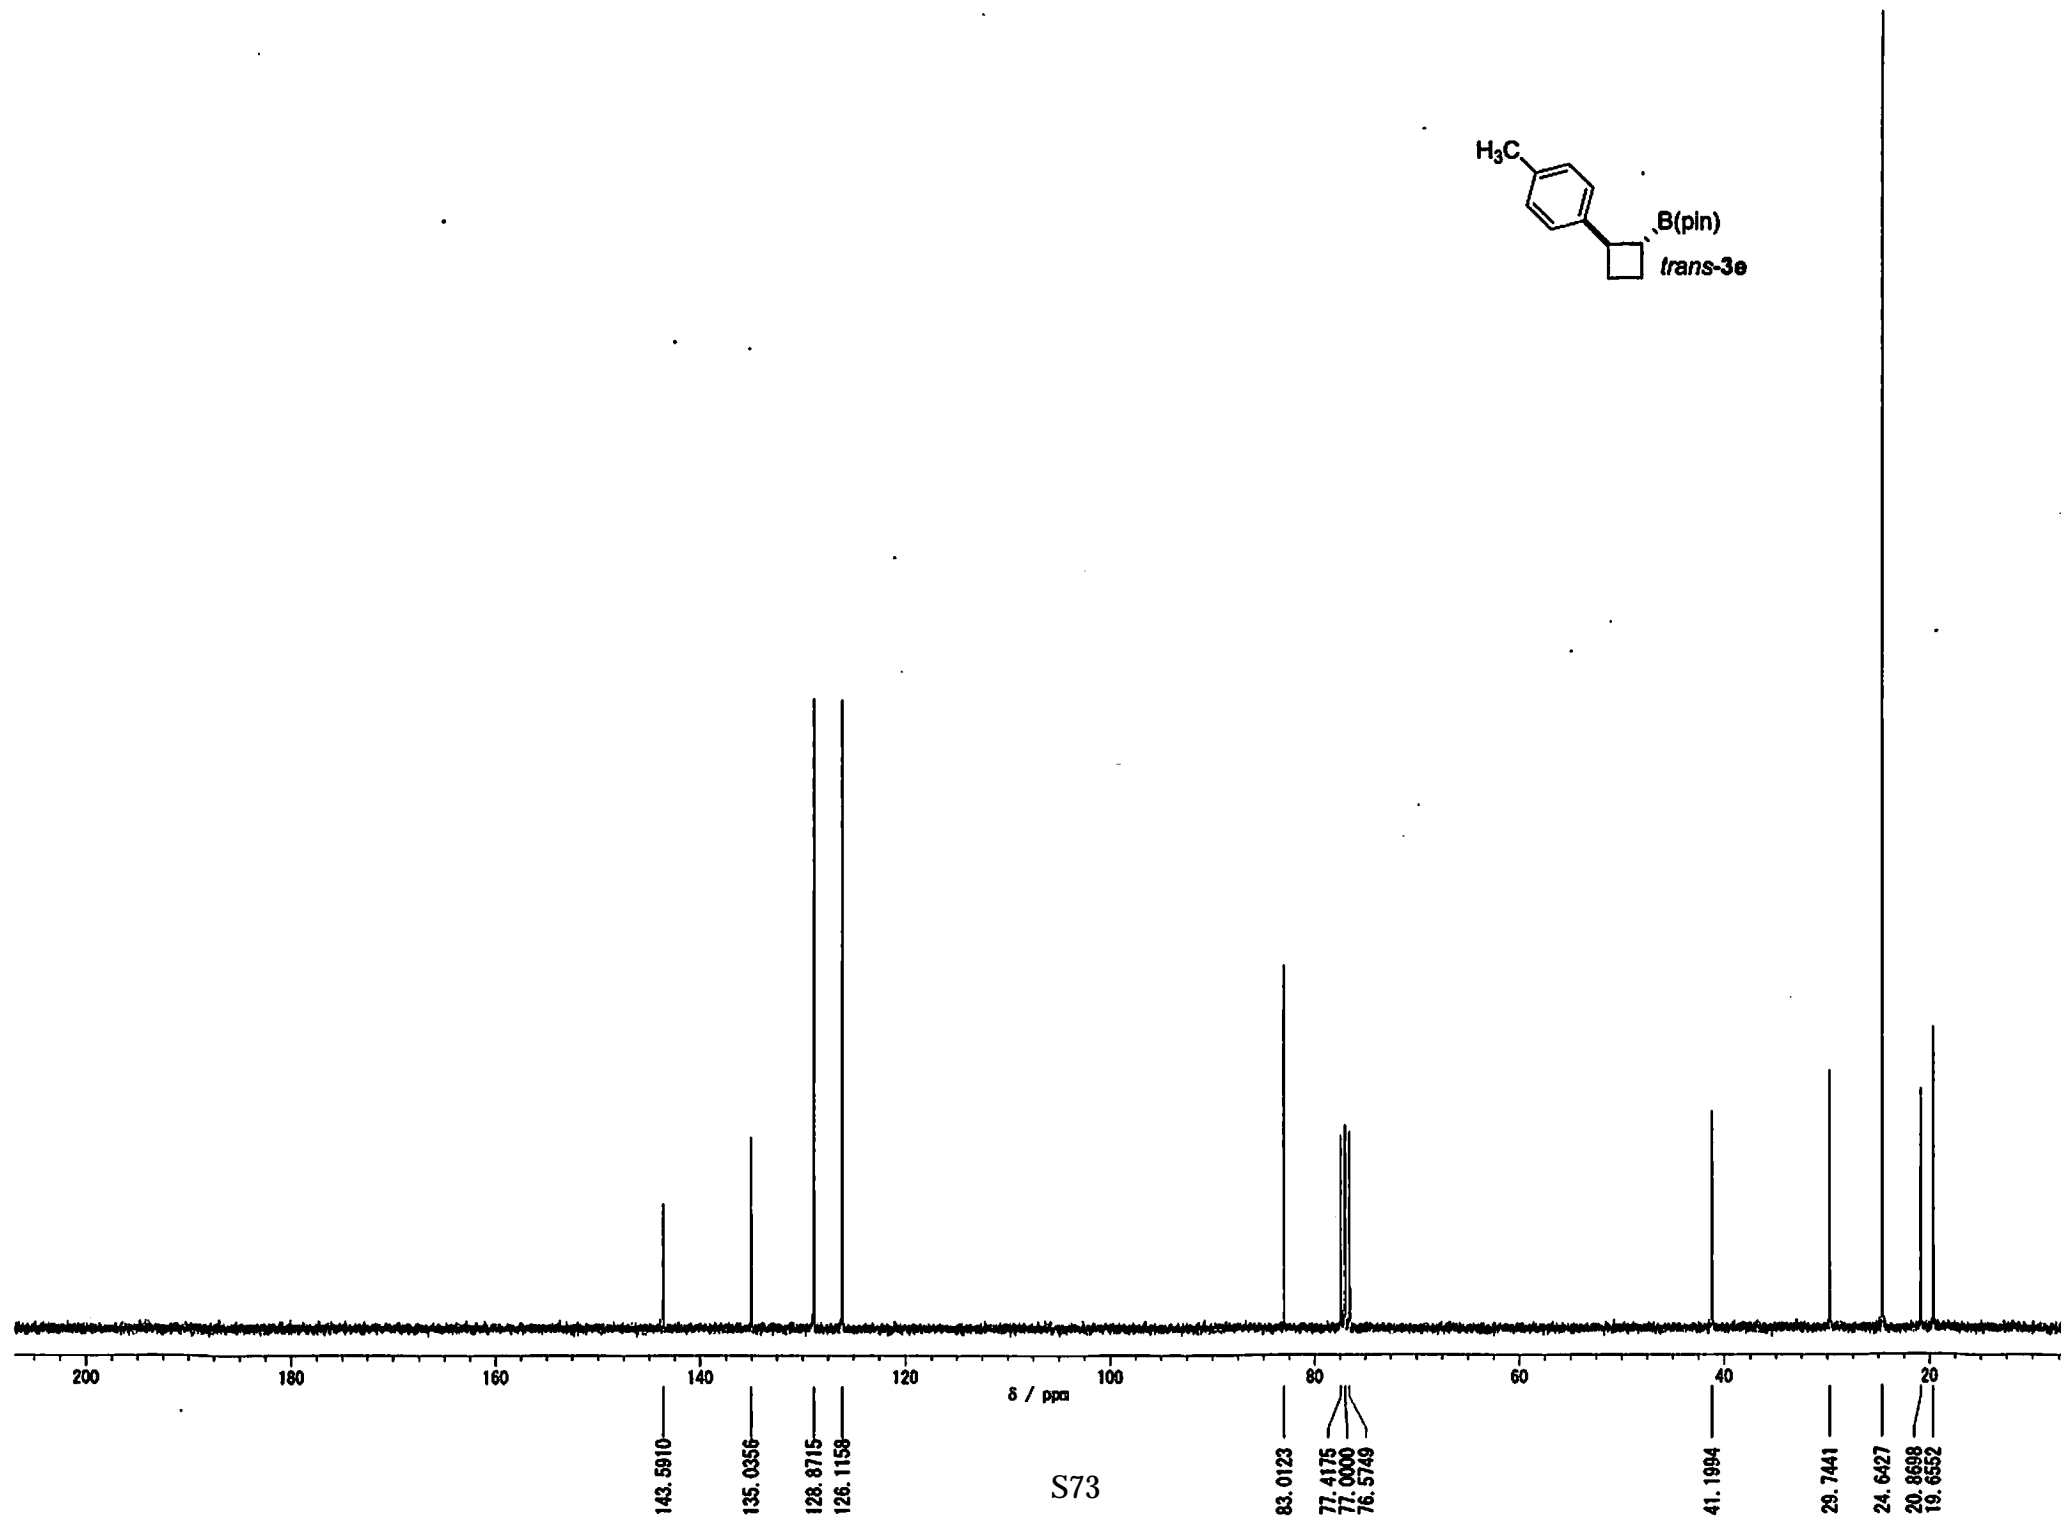

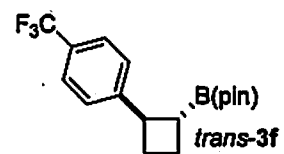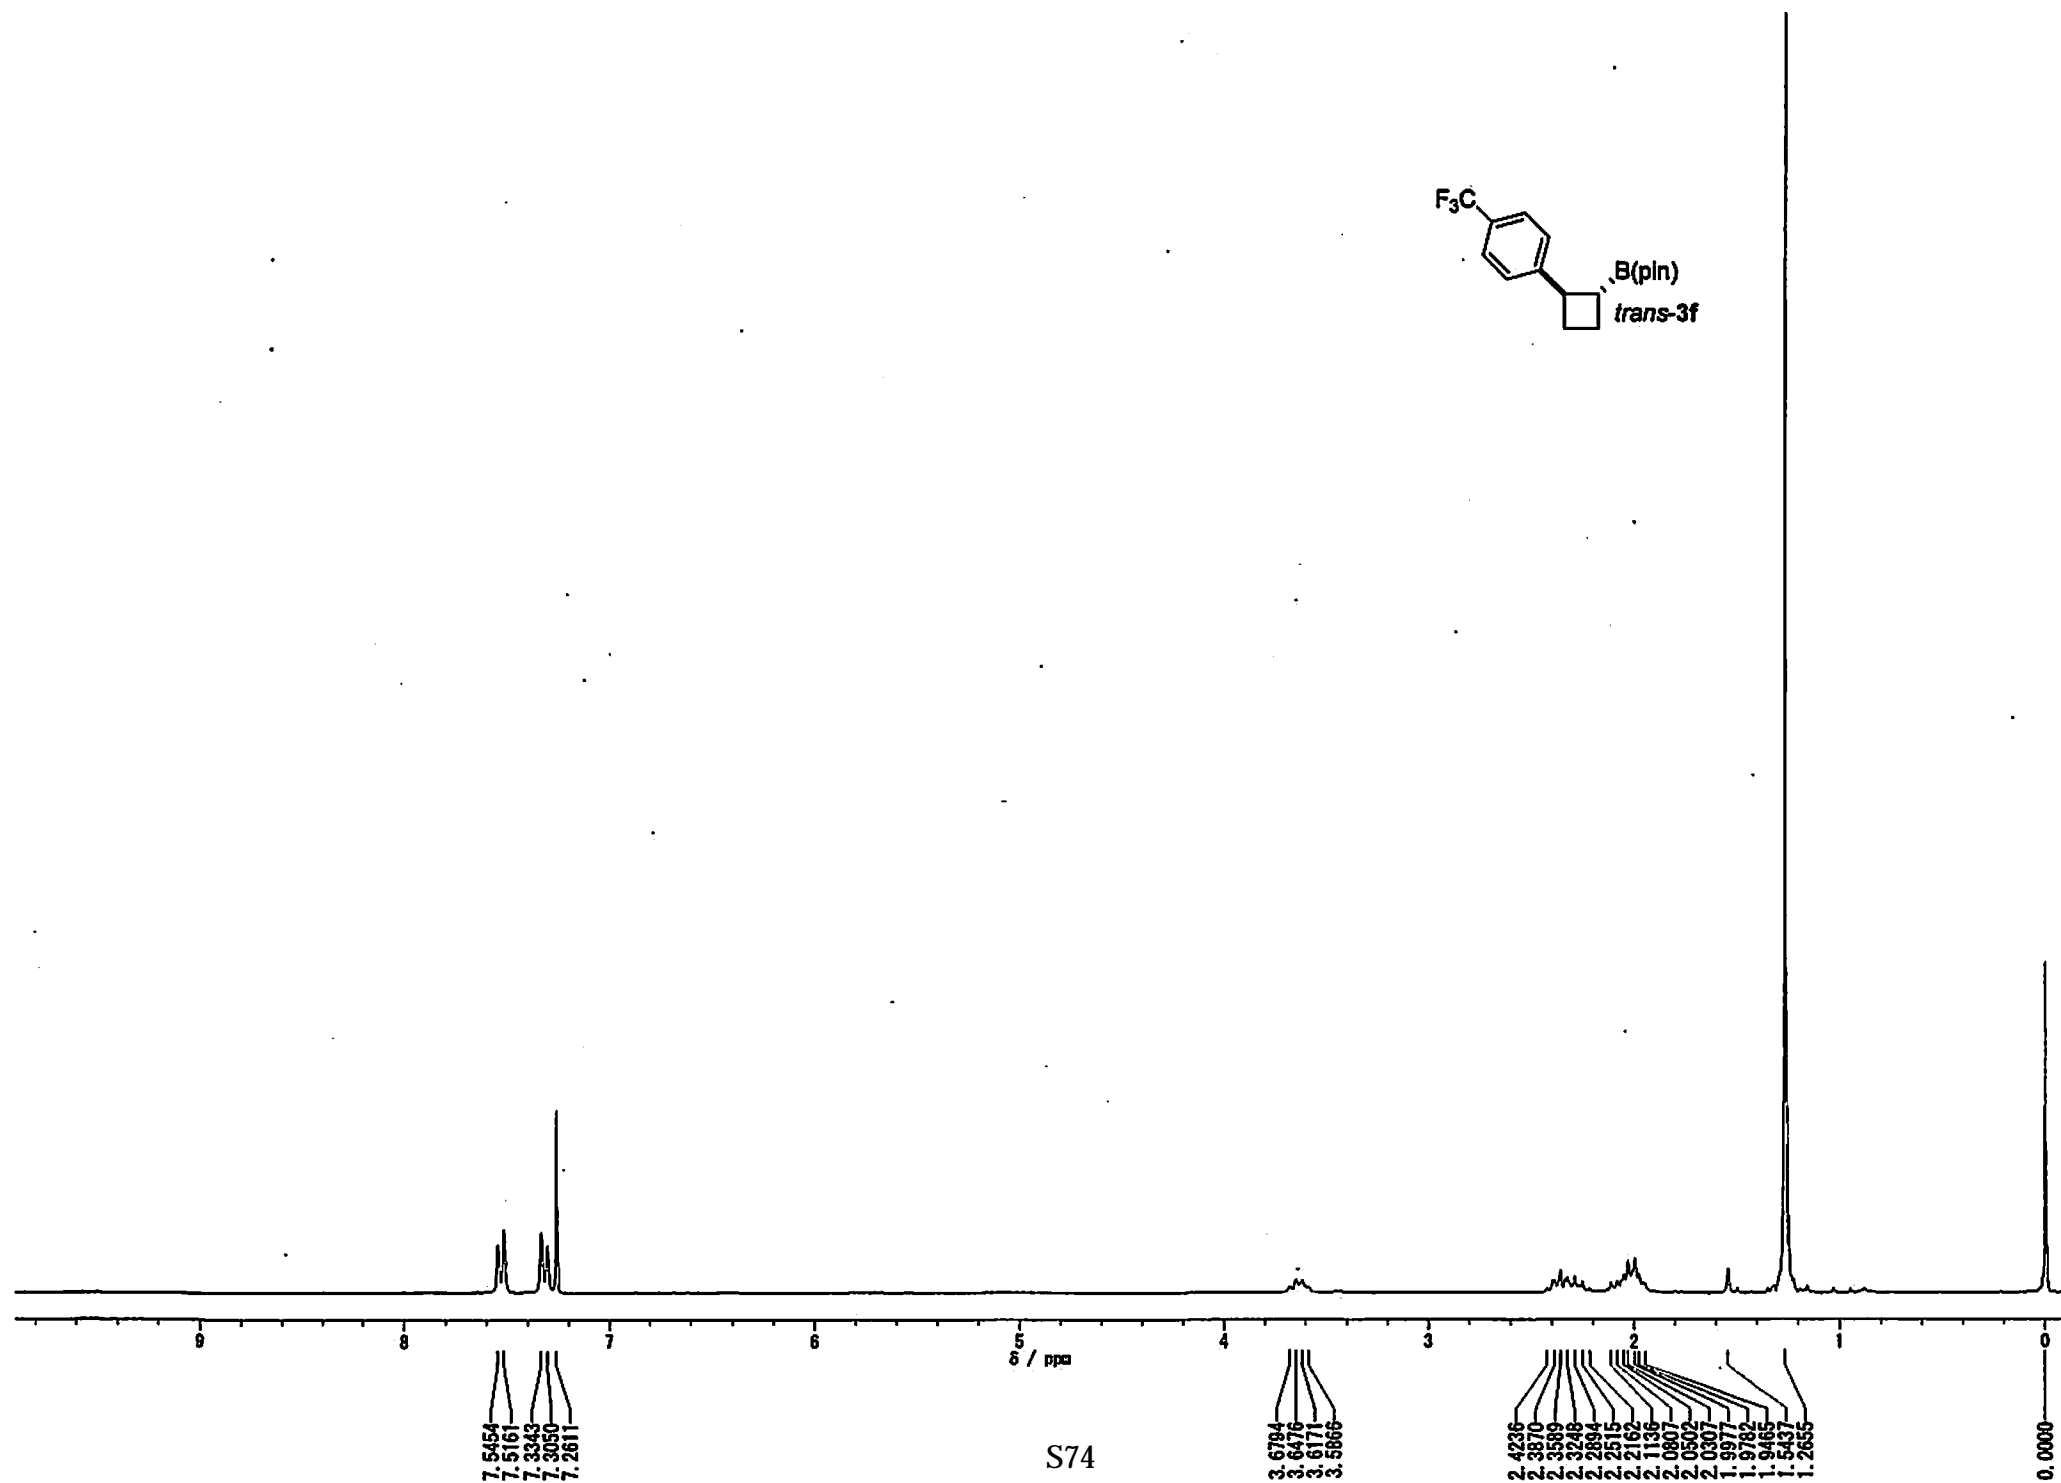

File: C:\DOCUMENTS AND SETTINGS\北海道大学\MY DOCUMENTS\DELL NMR データ\06Q1YTOYODAVTVD-601-700VTVD-651-700VTVD-671Y671\_13C-1.RM1  
 Original File:  
 Date: 13 Feb 2010 22:58:18  
 Comment:  
 671  
 obsAcq: single\_pulse\_dec  
 ObsFreq: 150.91 MHz  
 ObsSqr: 3.0 MHz  
 ObsLine: 426.7318 Hz  
 Point: 32768  
 Frequency(Span): 37735.85 Hz  
 Scan: 15000  
 AcqTime: 0.8684 s  
 PD: 2.0 s  
 Pulse1: 1.3333  $\mu$ s  
 Temperature: 25.3  $^{\circ}$ C  
 Solvent: CDCl<sub>3</sub>  
 Reference: 77.0 ppm  
 Broad Factor: 0.5758 Hz  
 Rgain: 68  
 Printed: 2010/Feb/28 16:48:35  
 Operator:

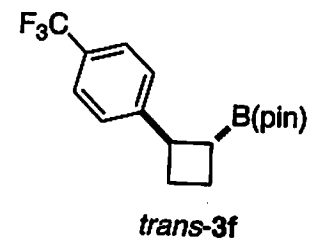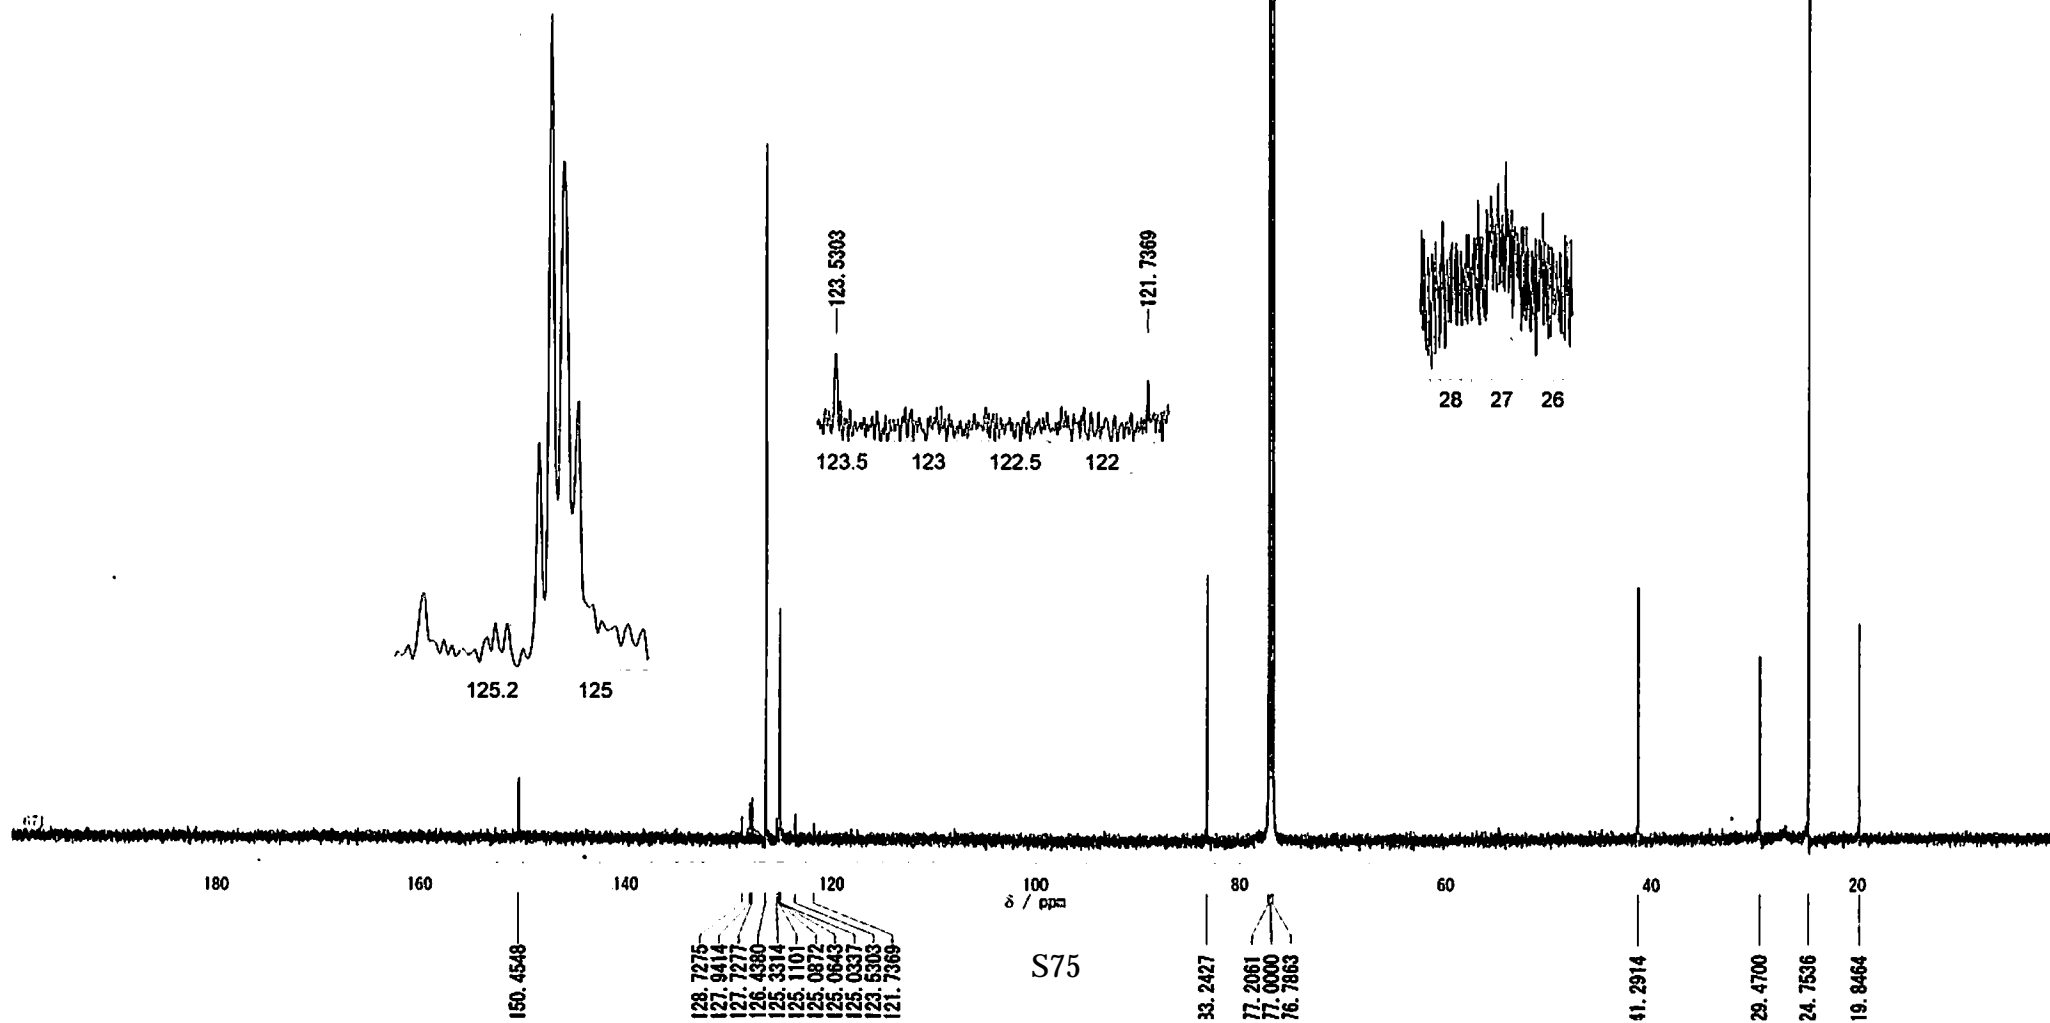

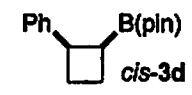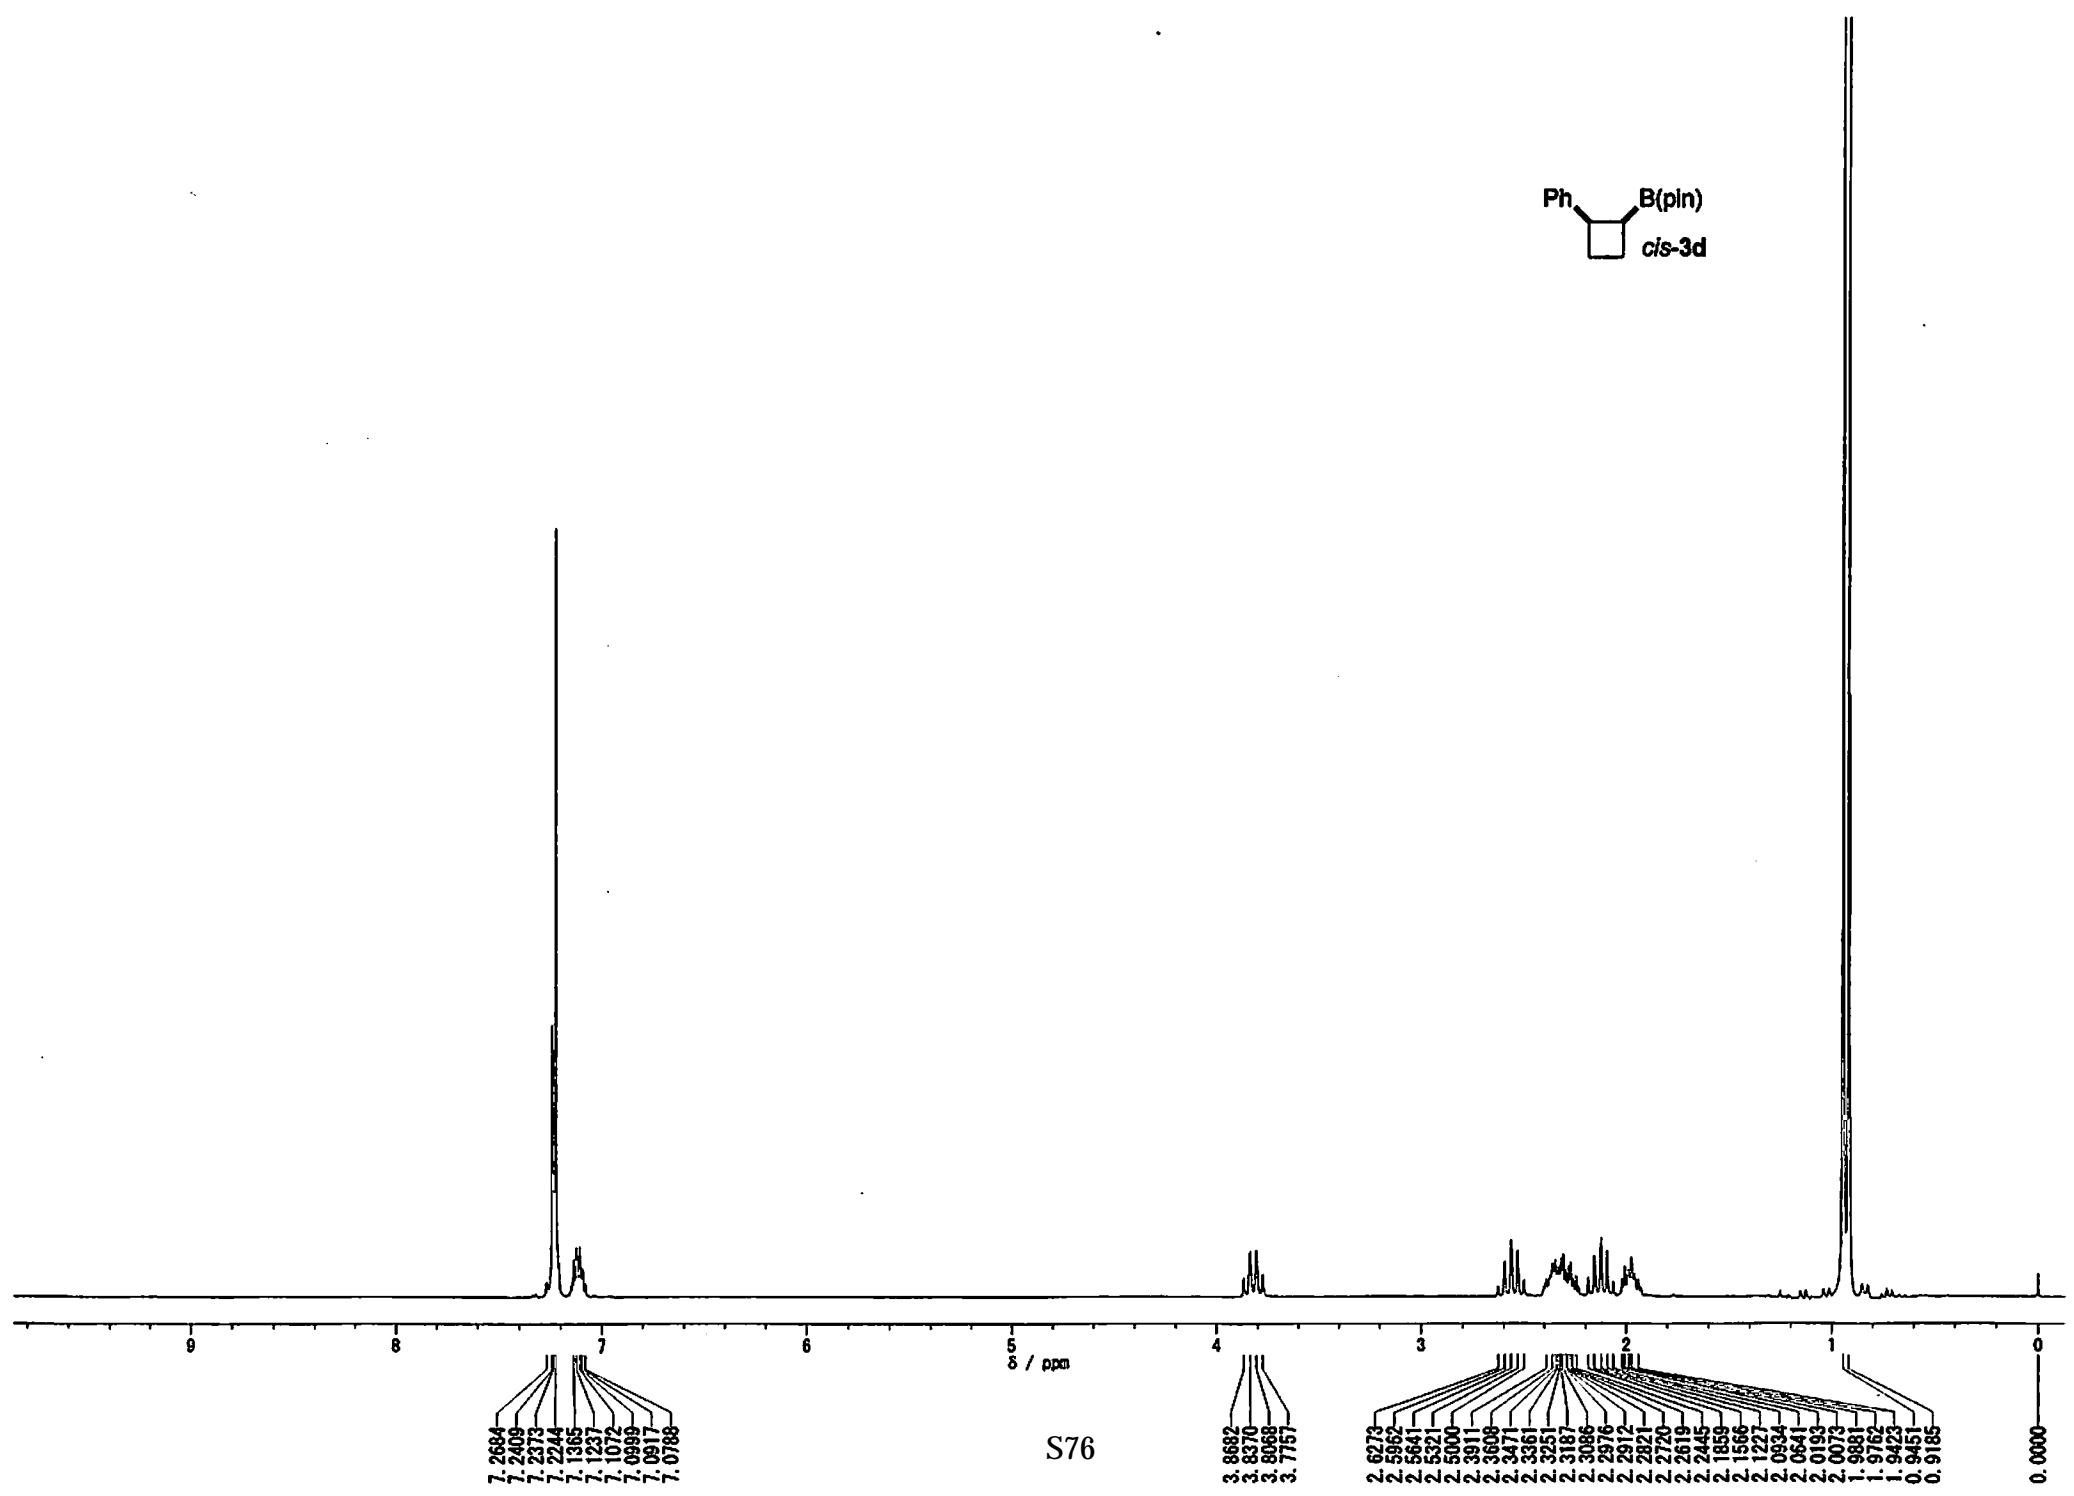

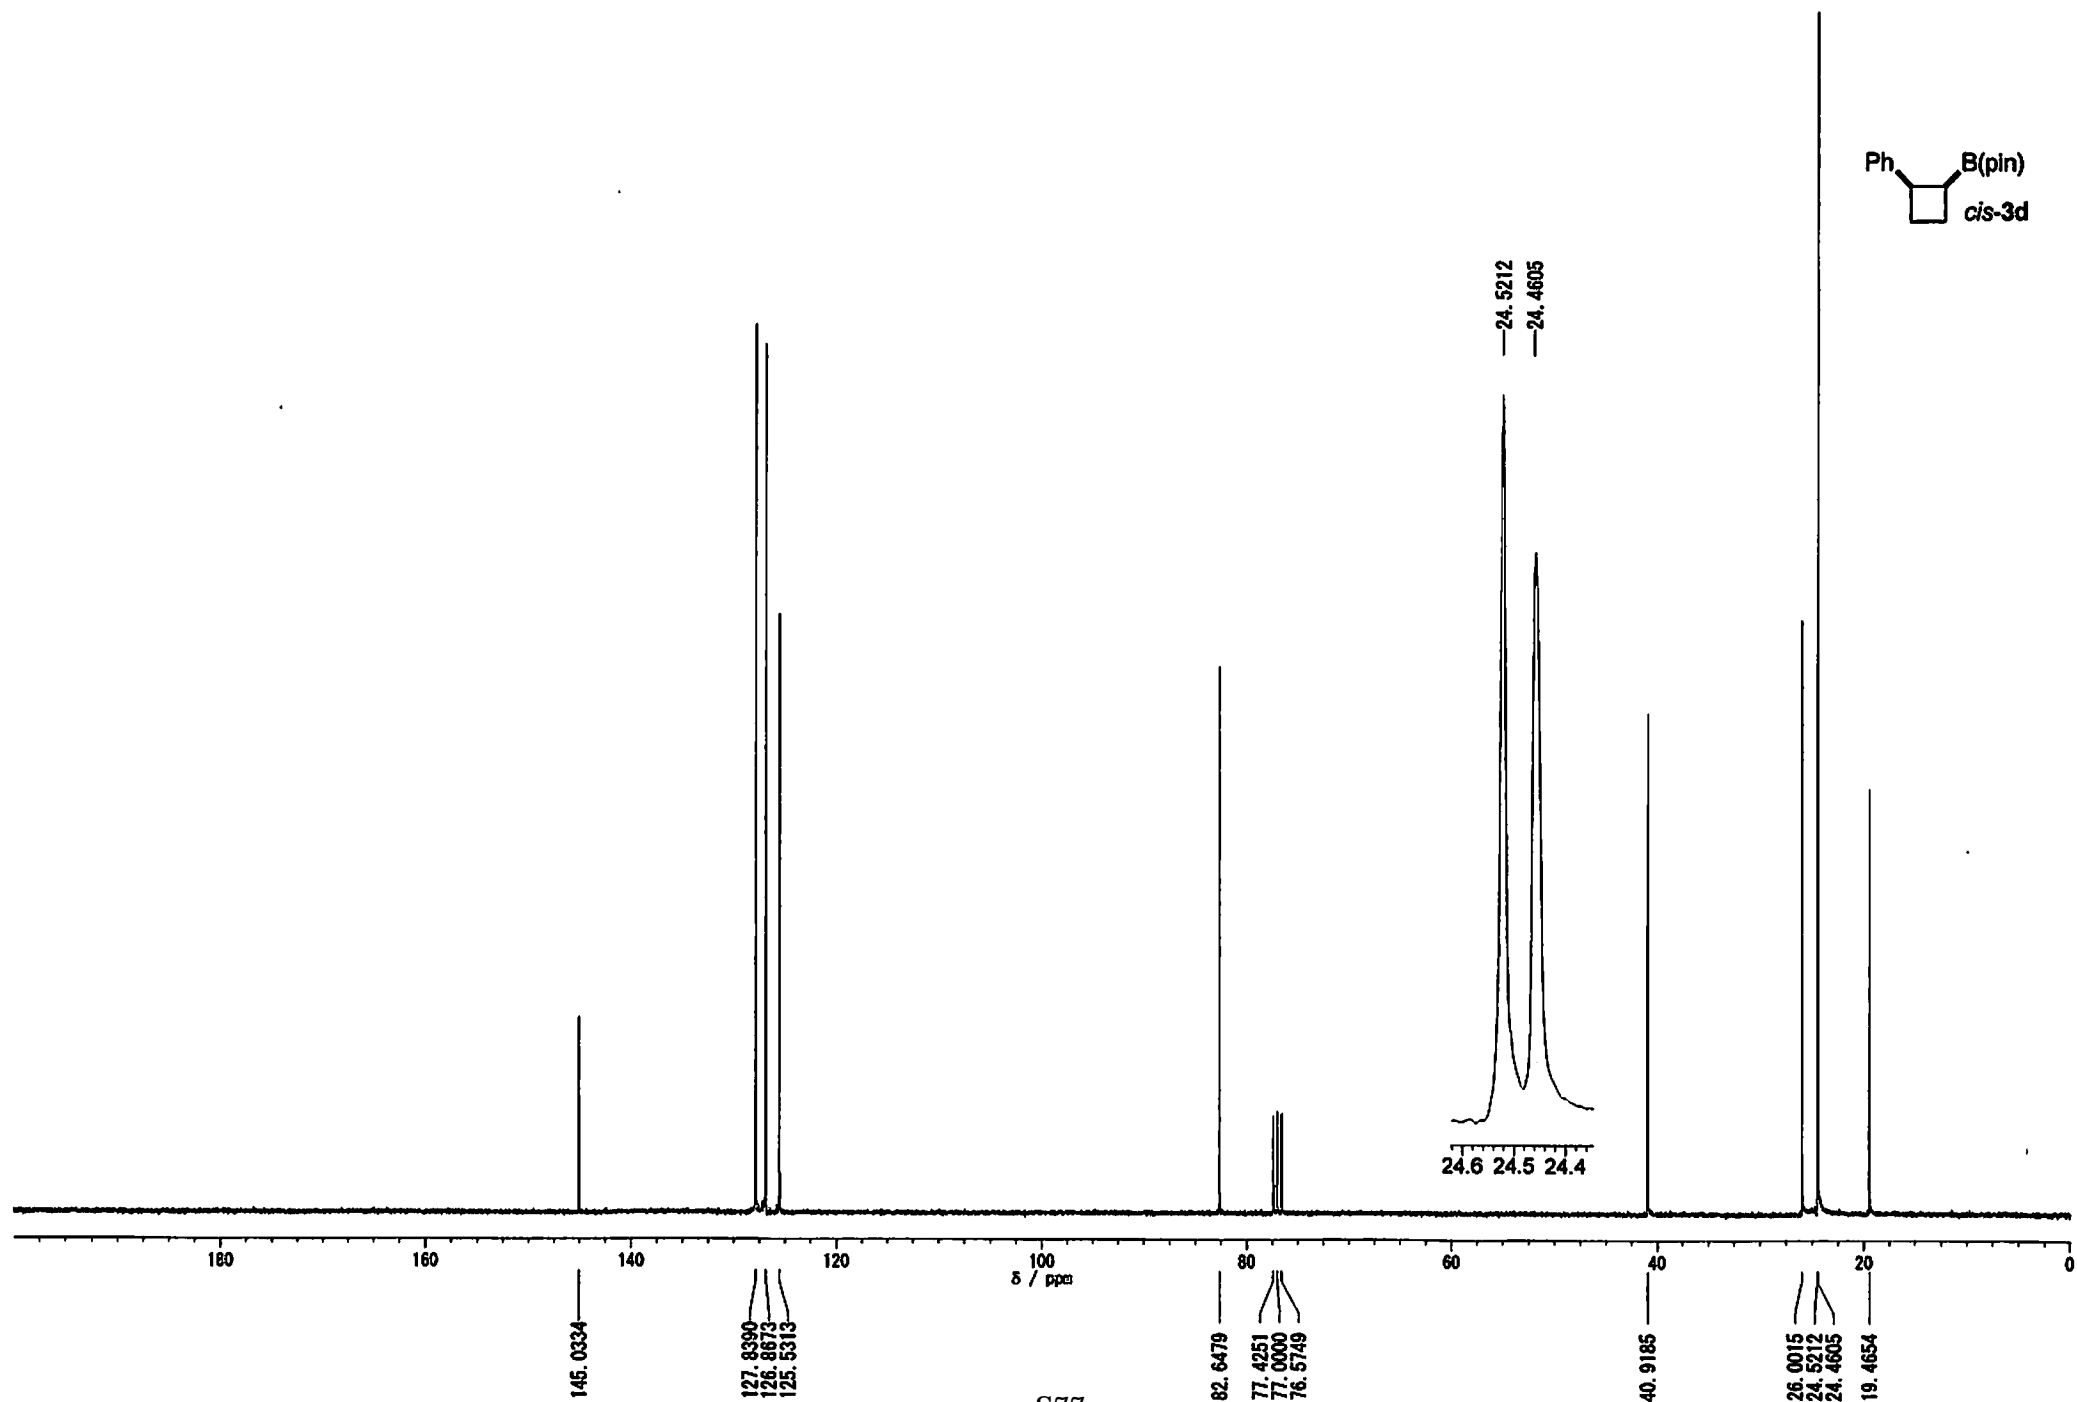

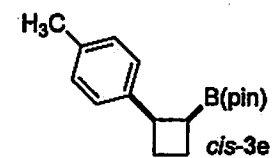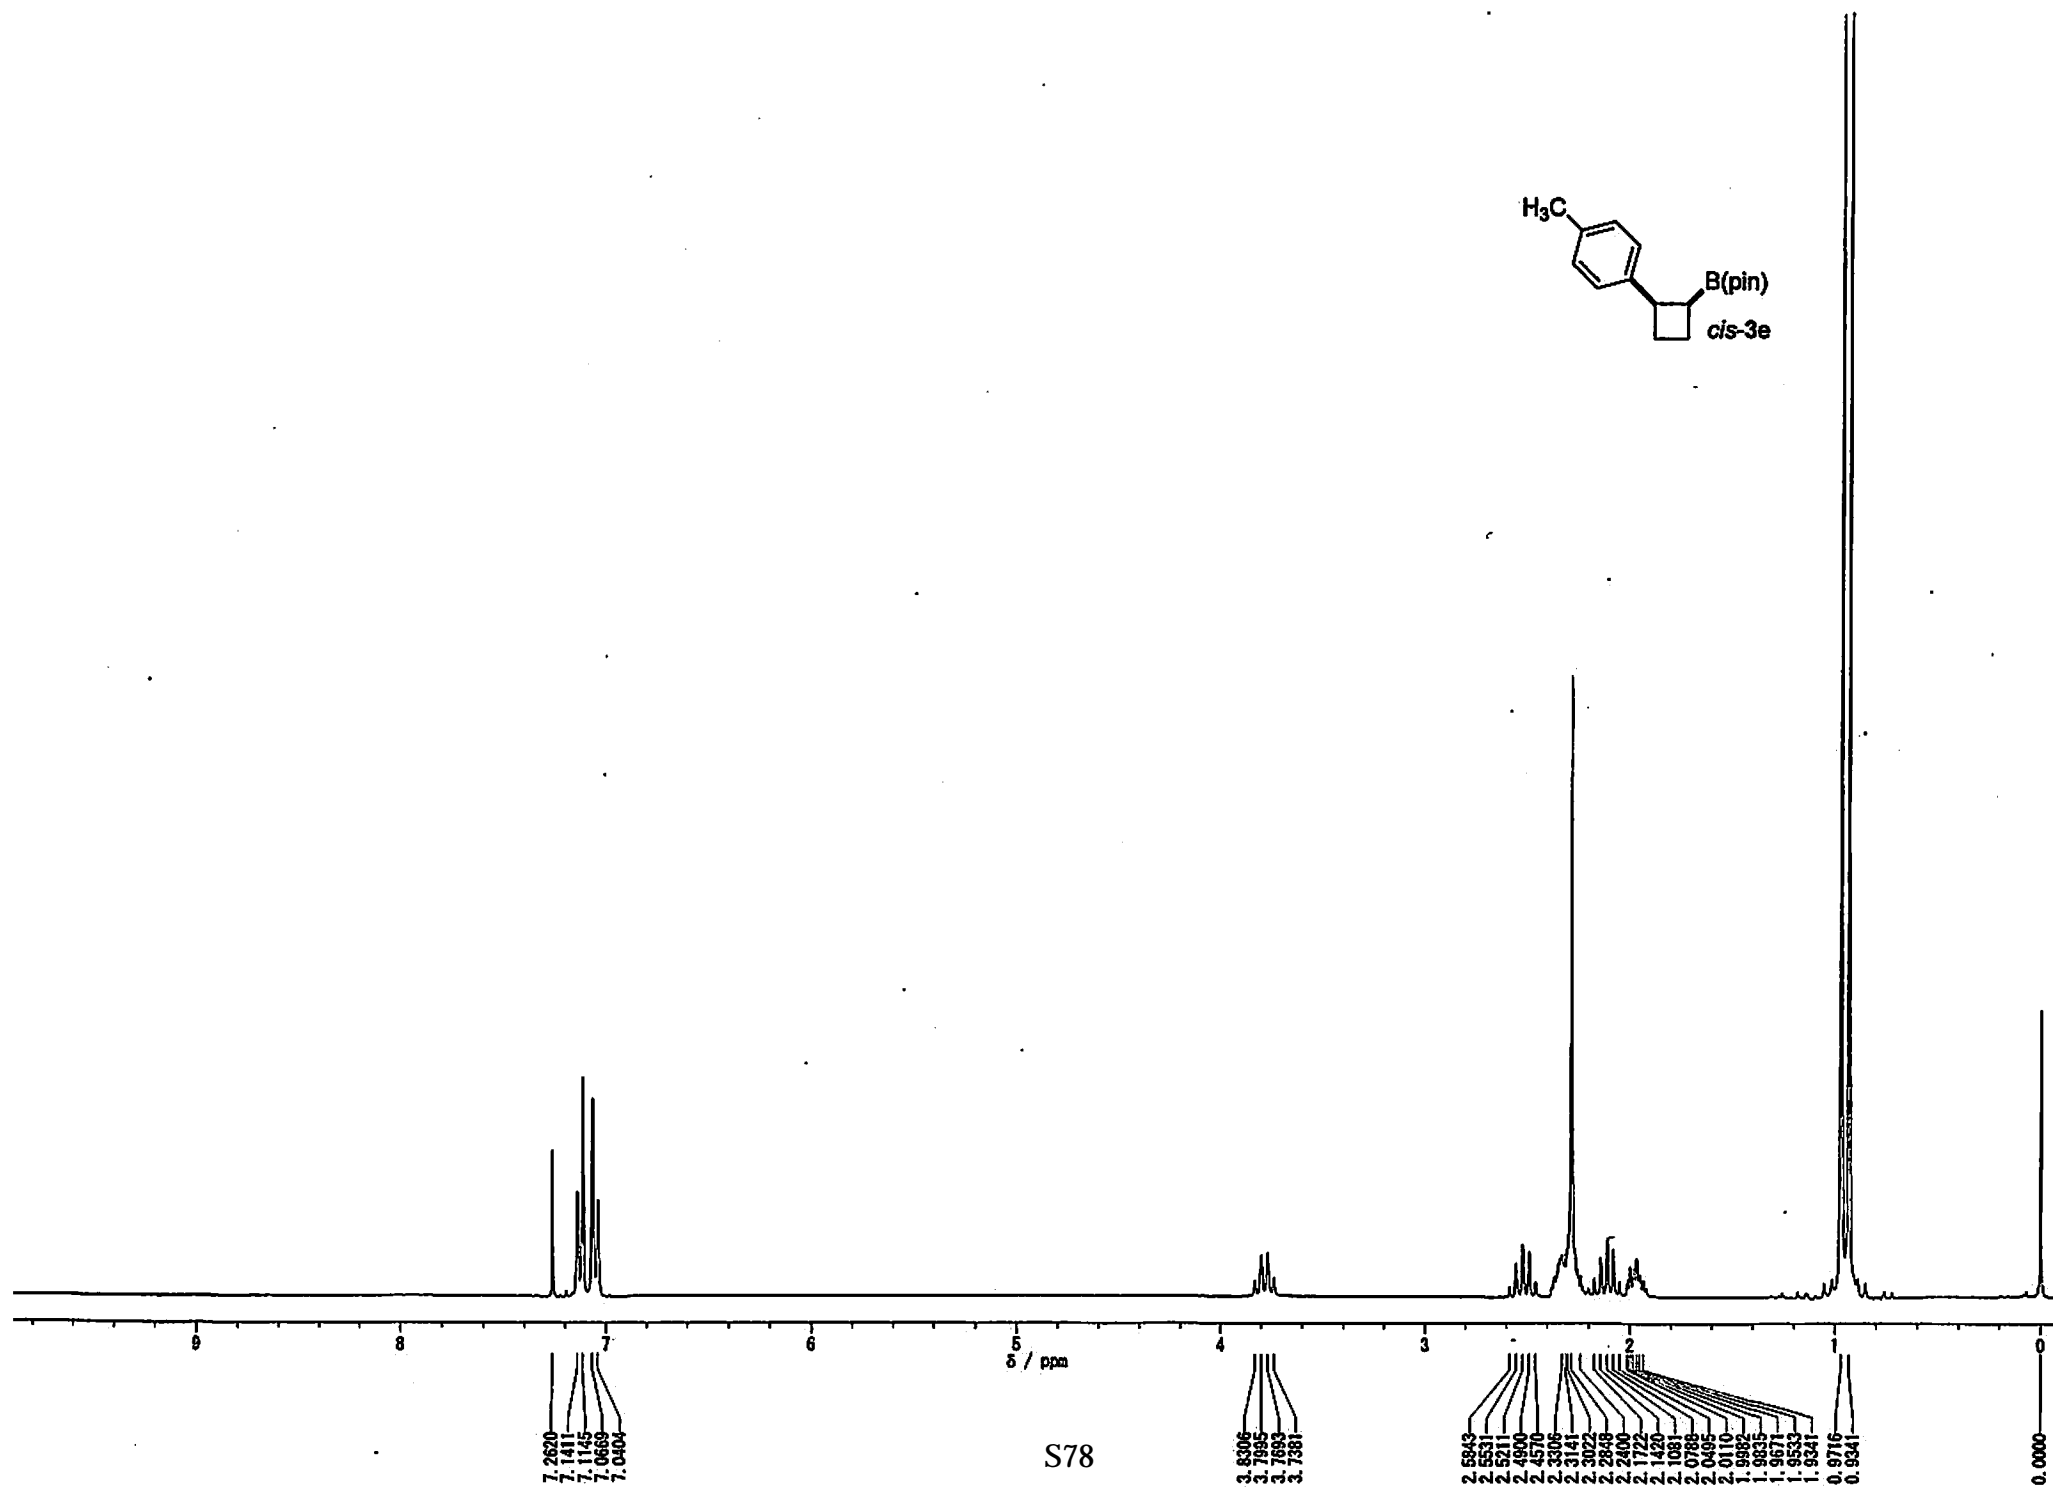

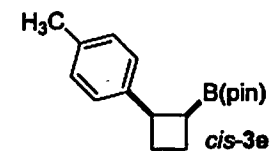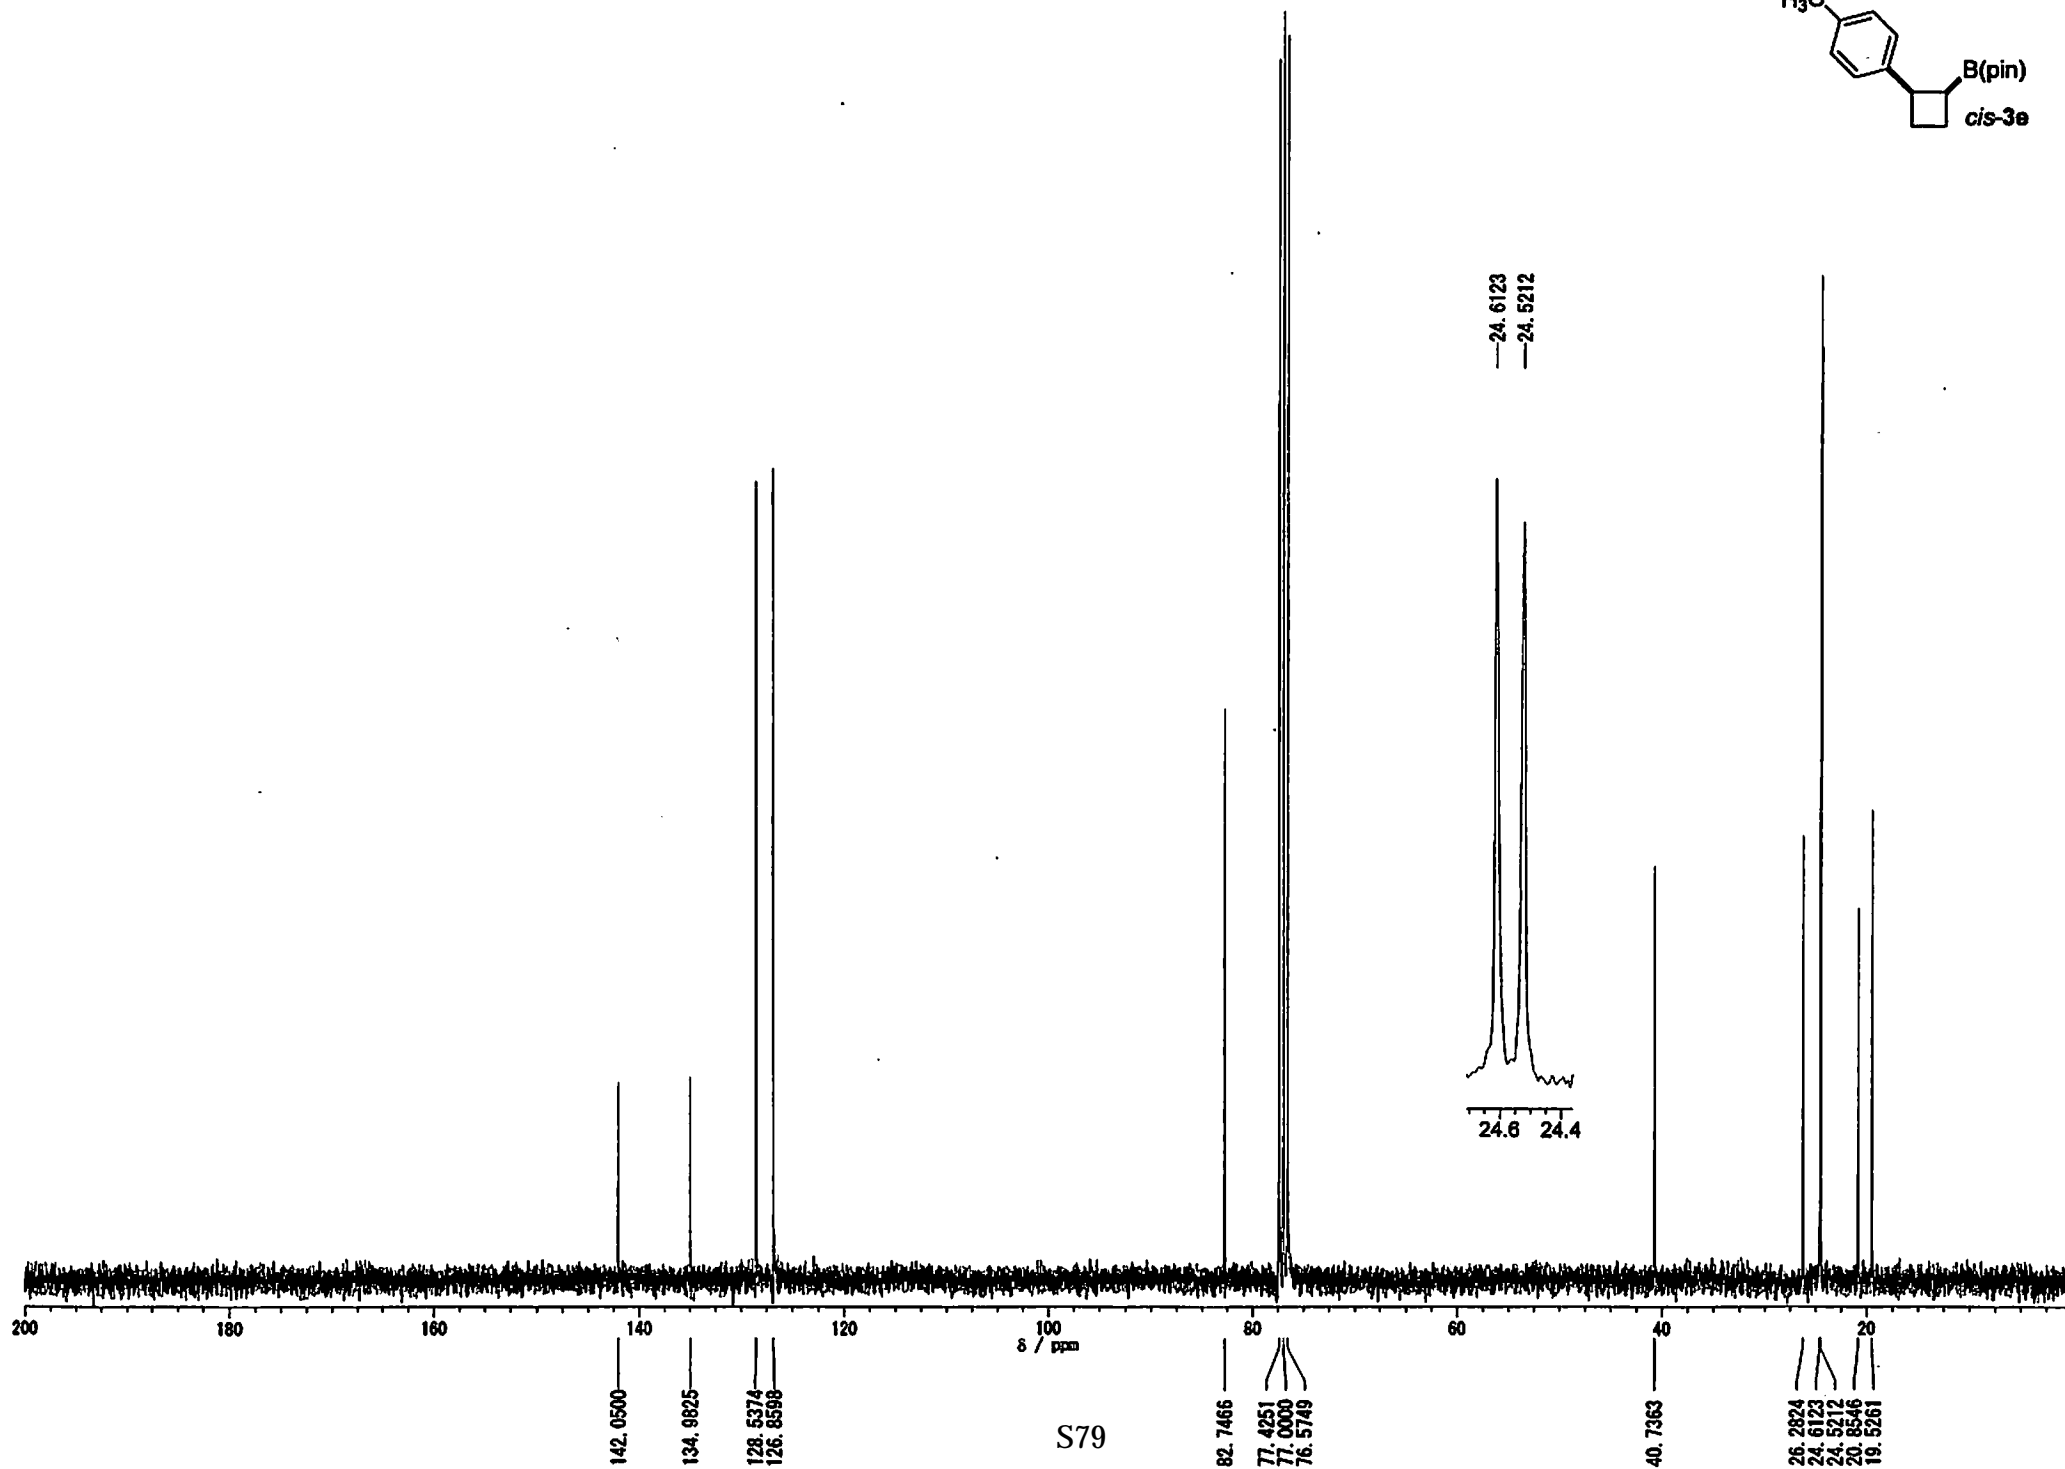

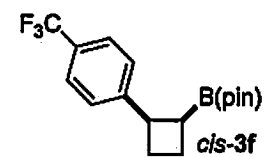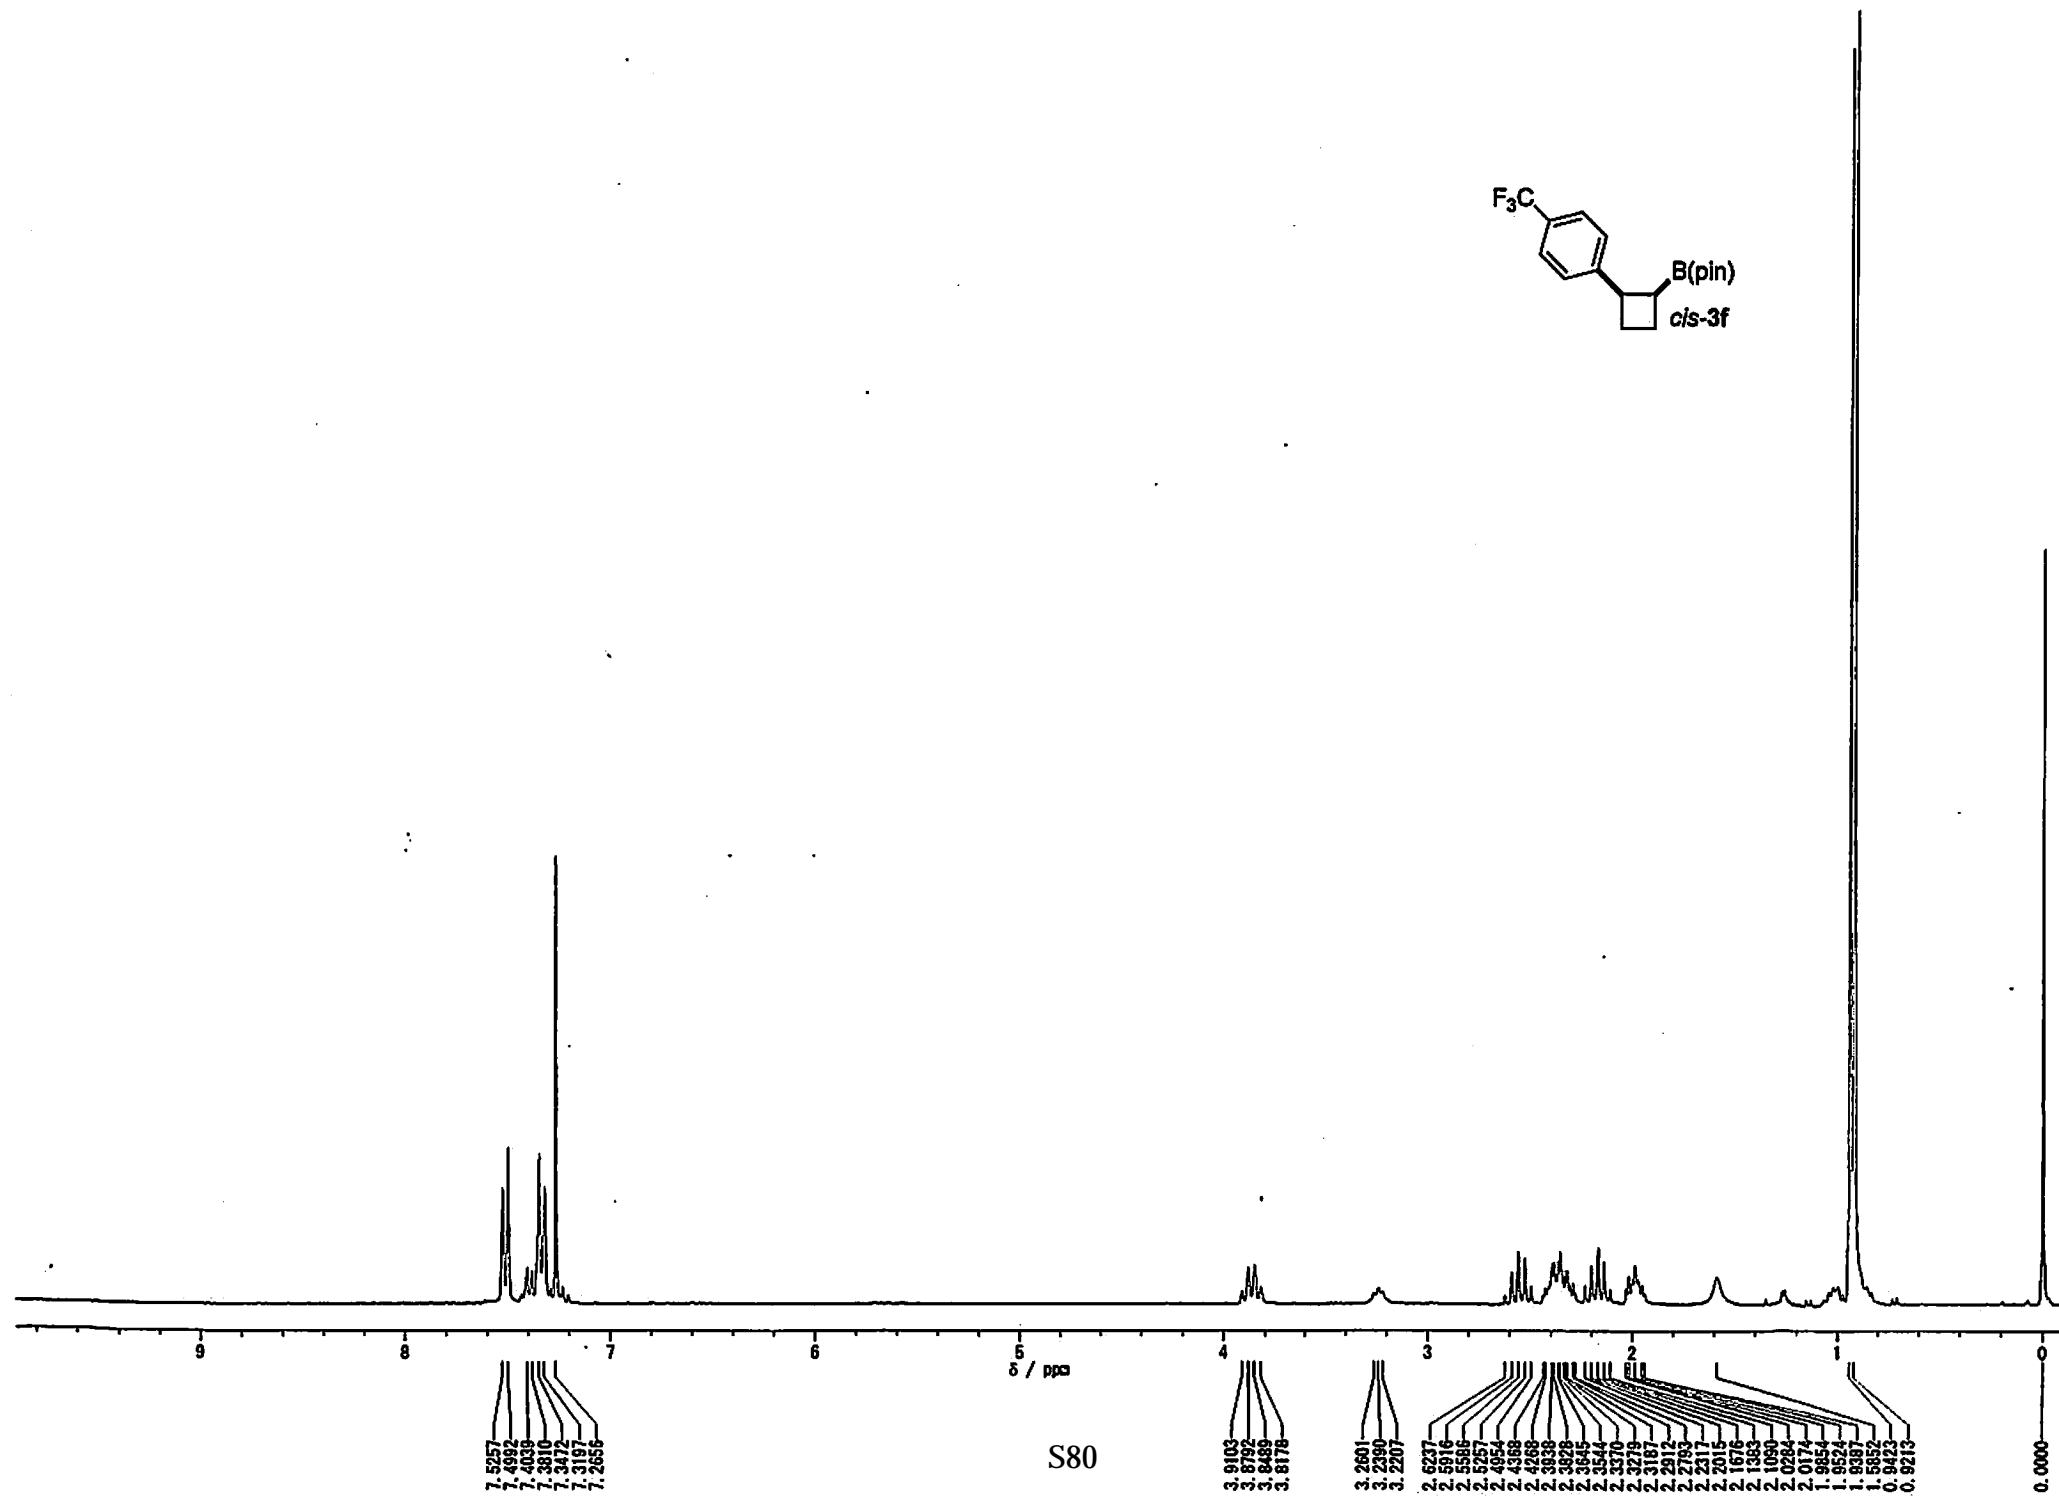



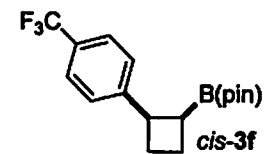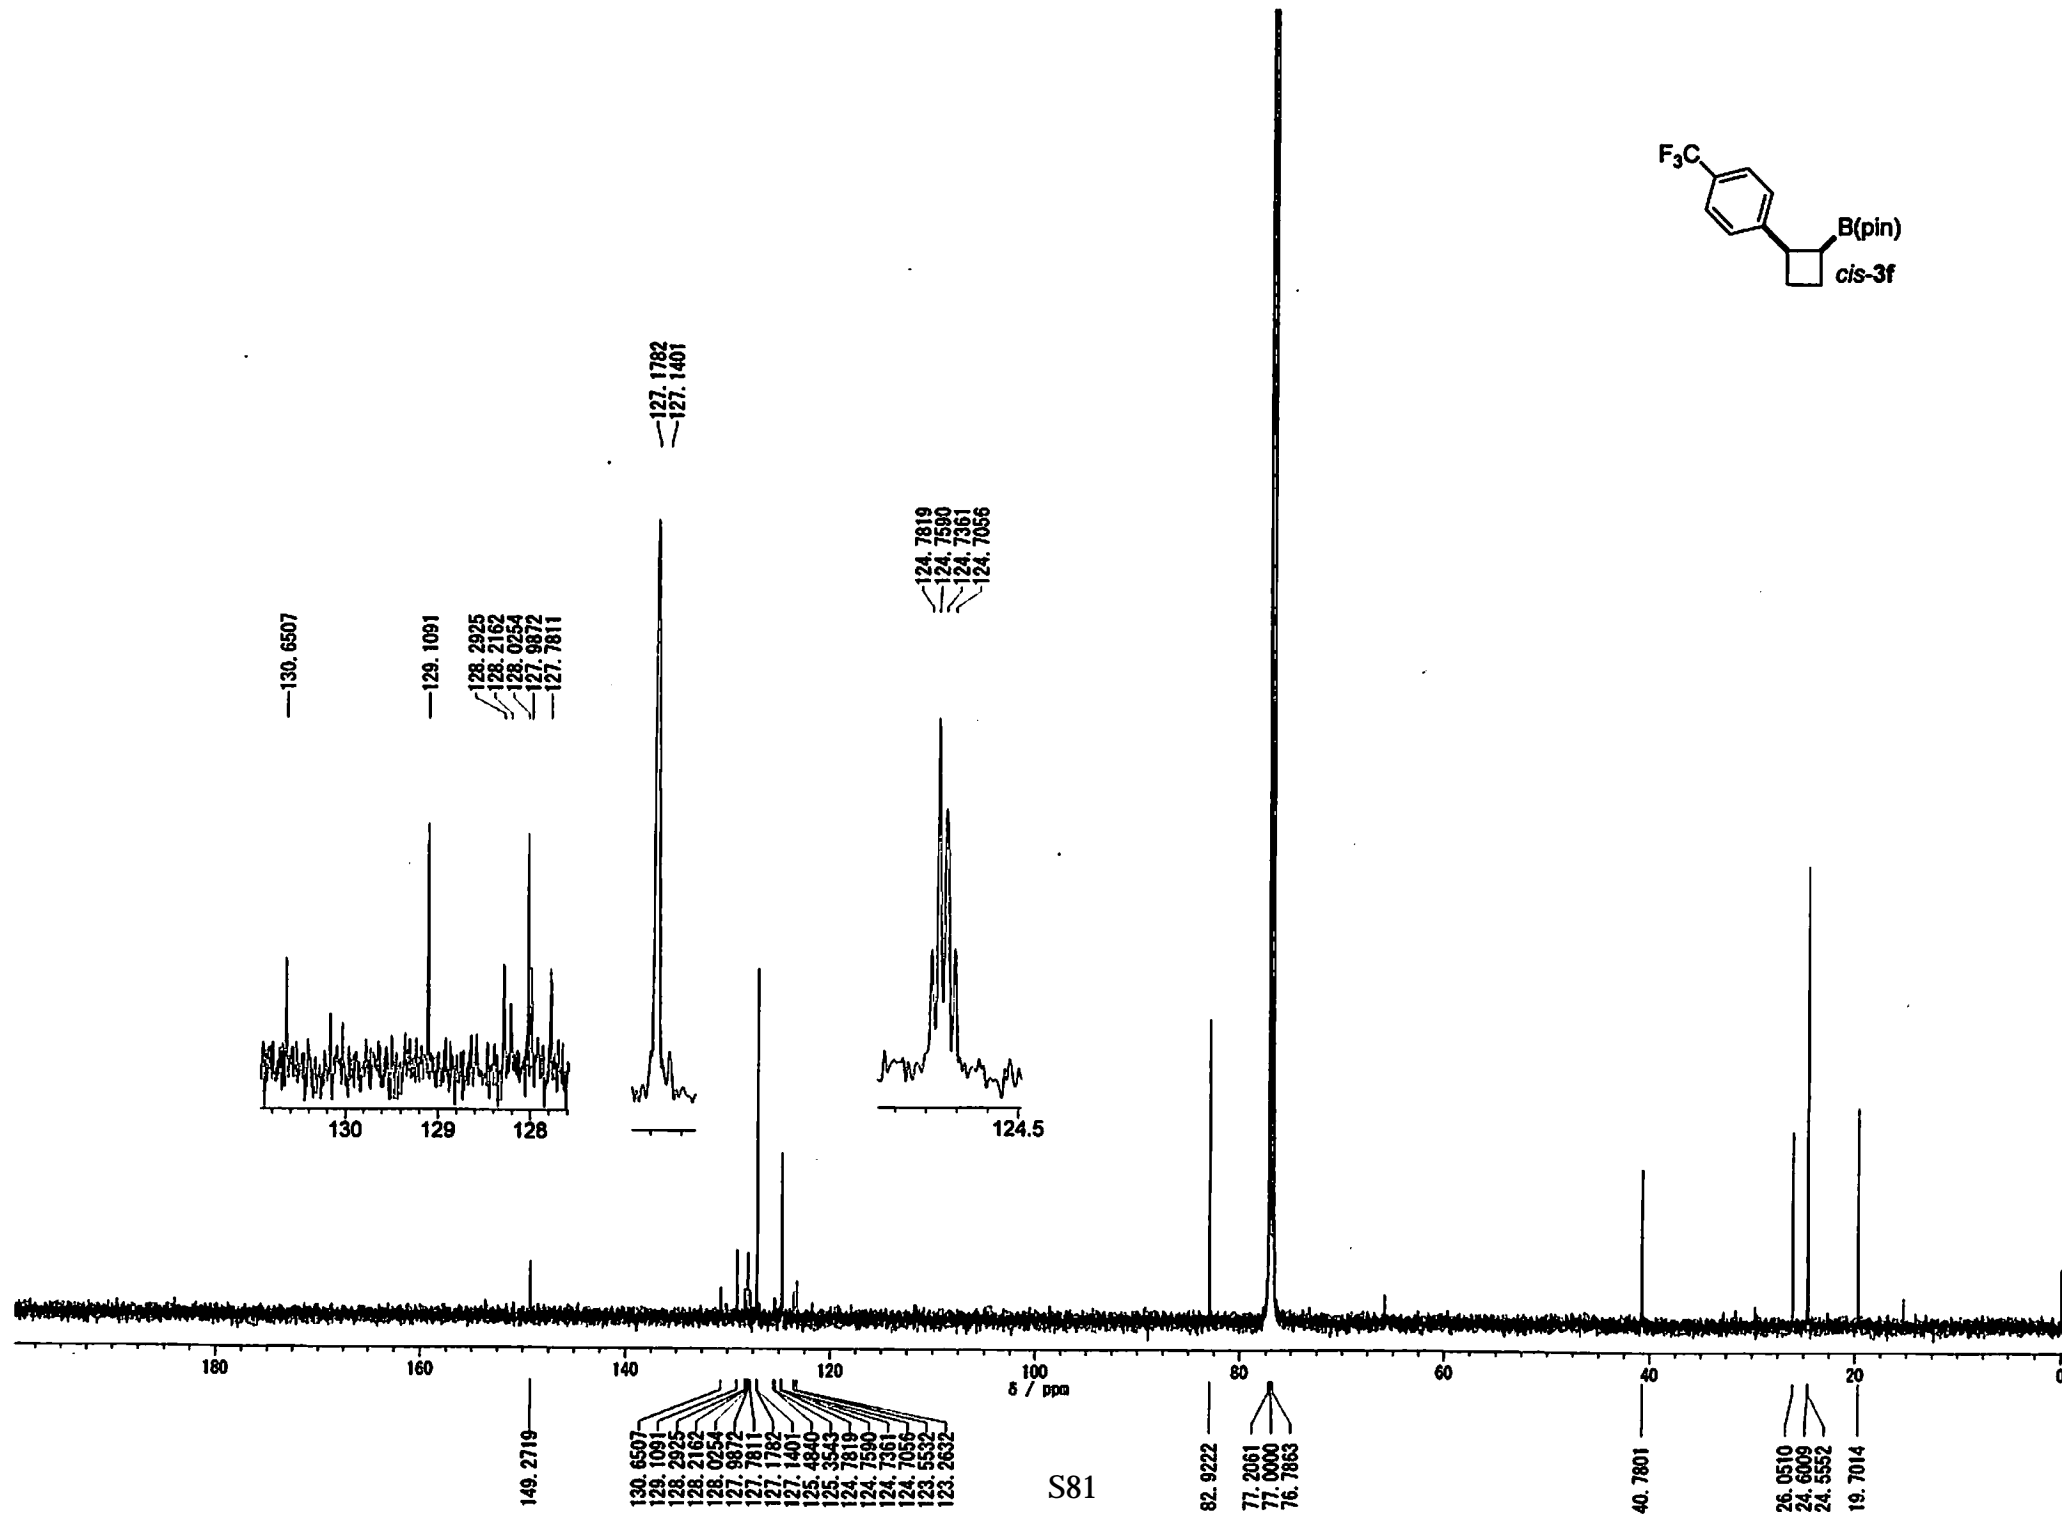

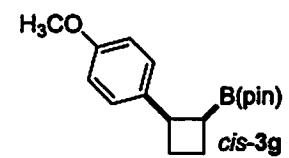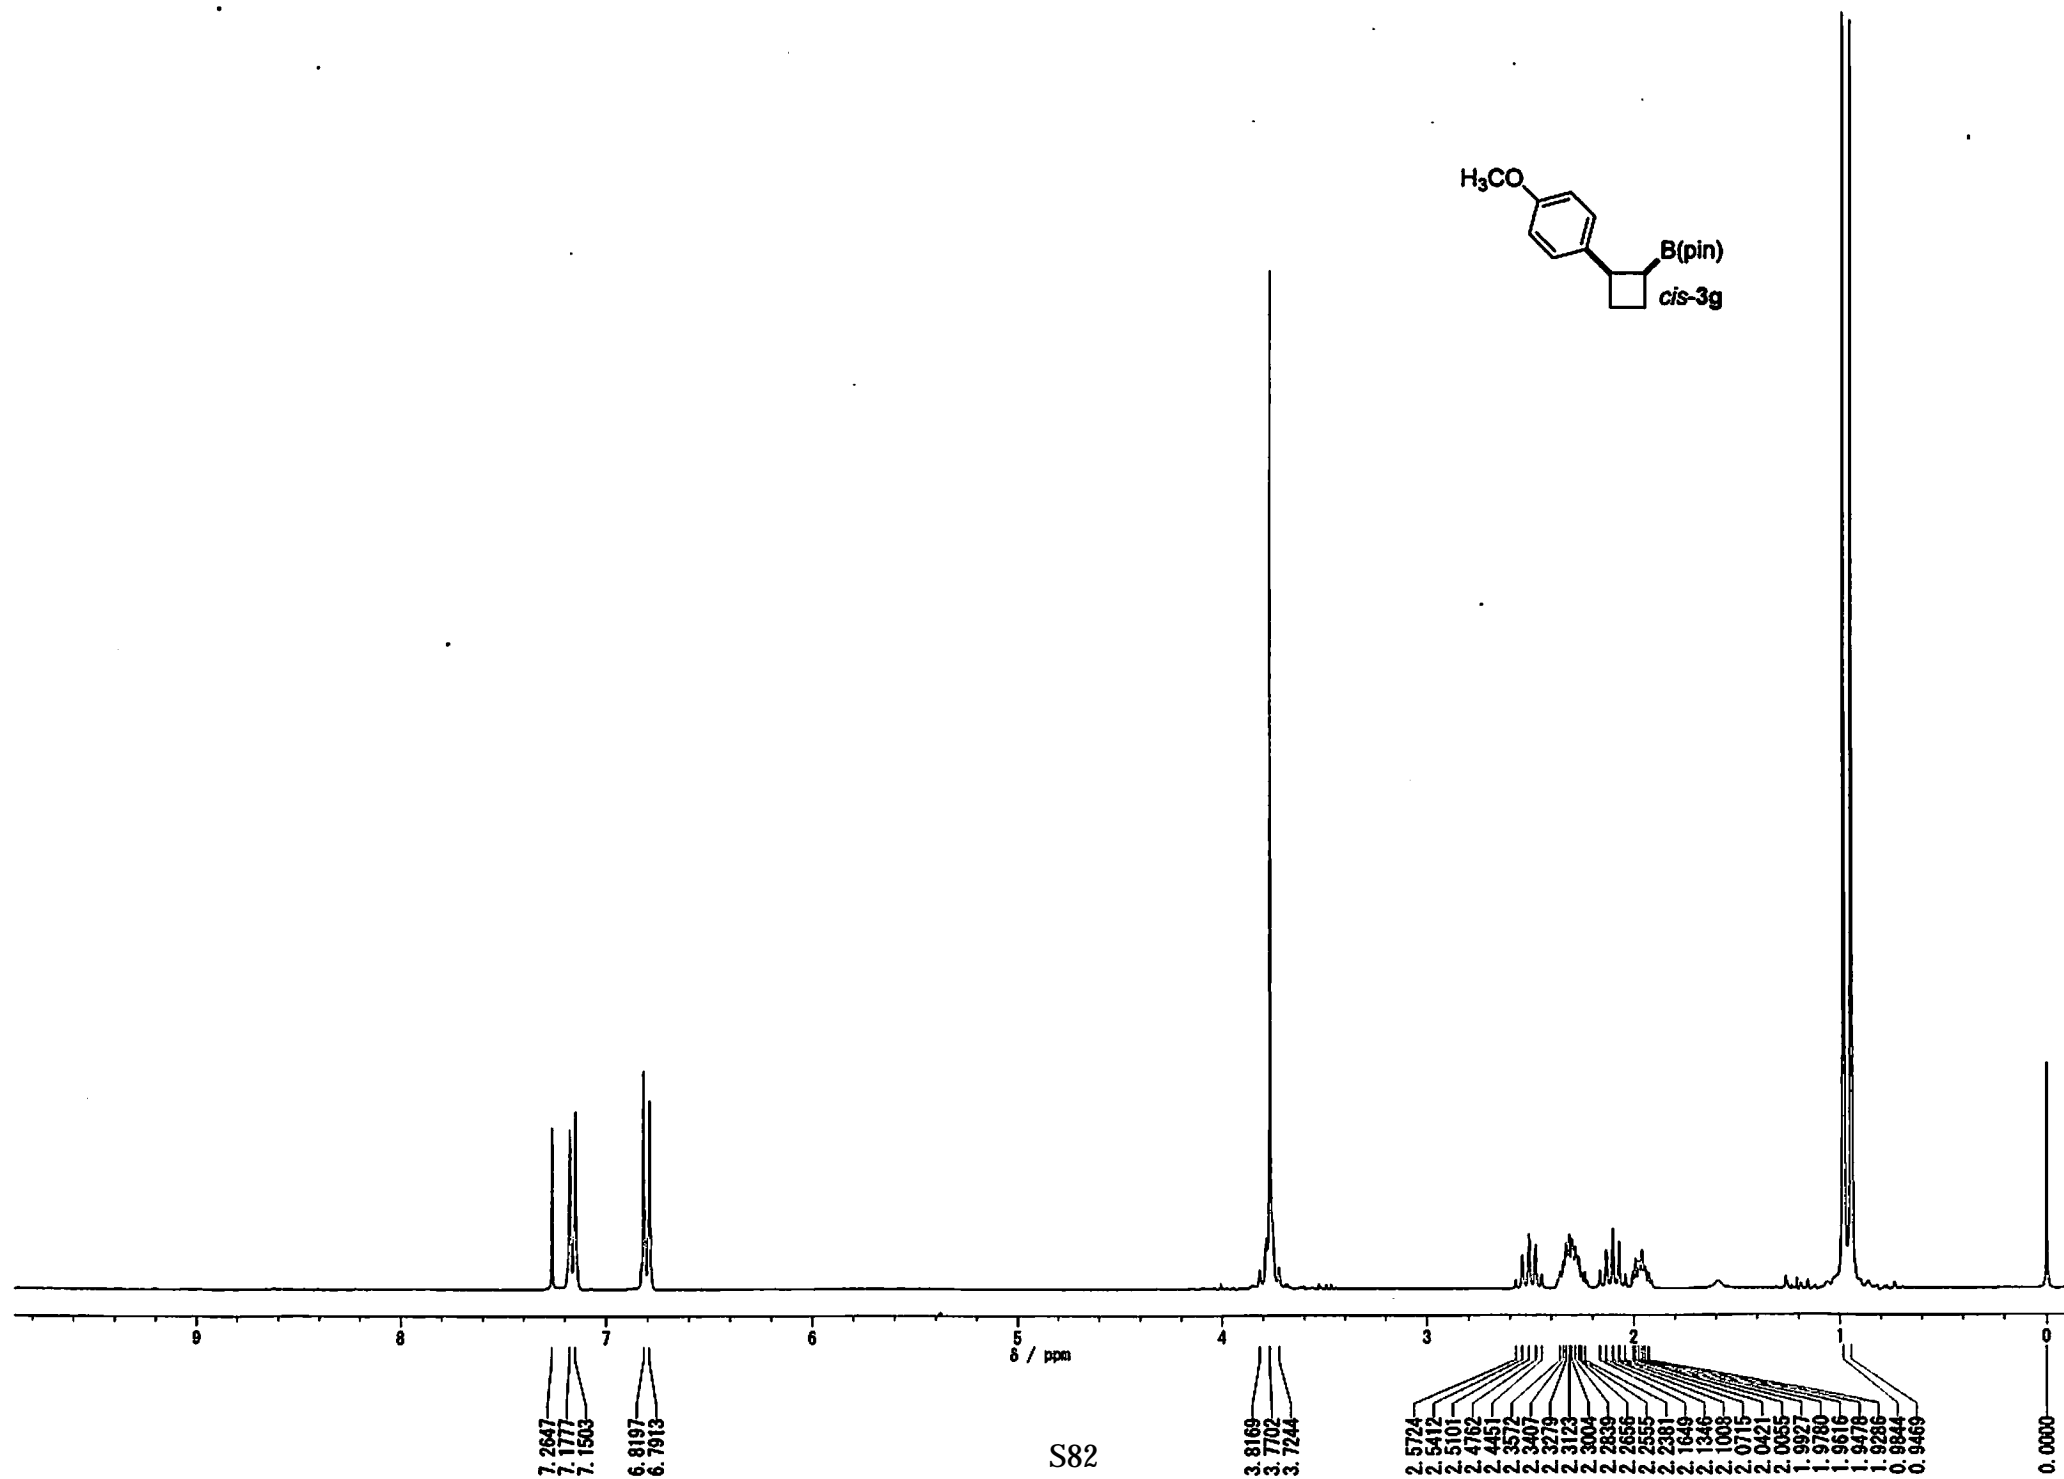

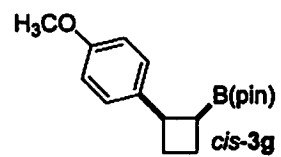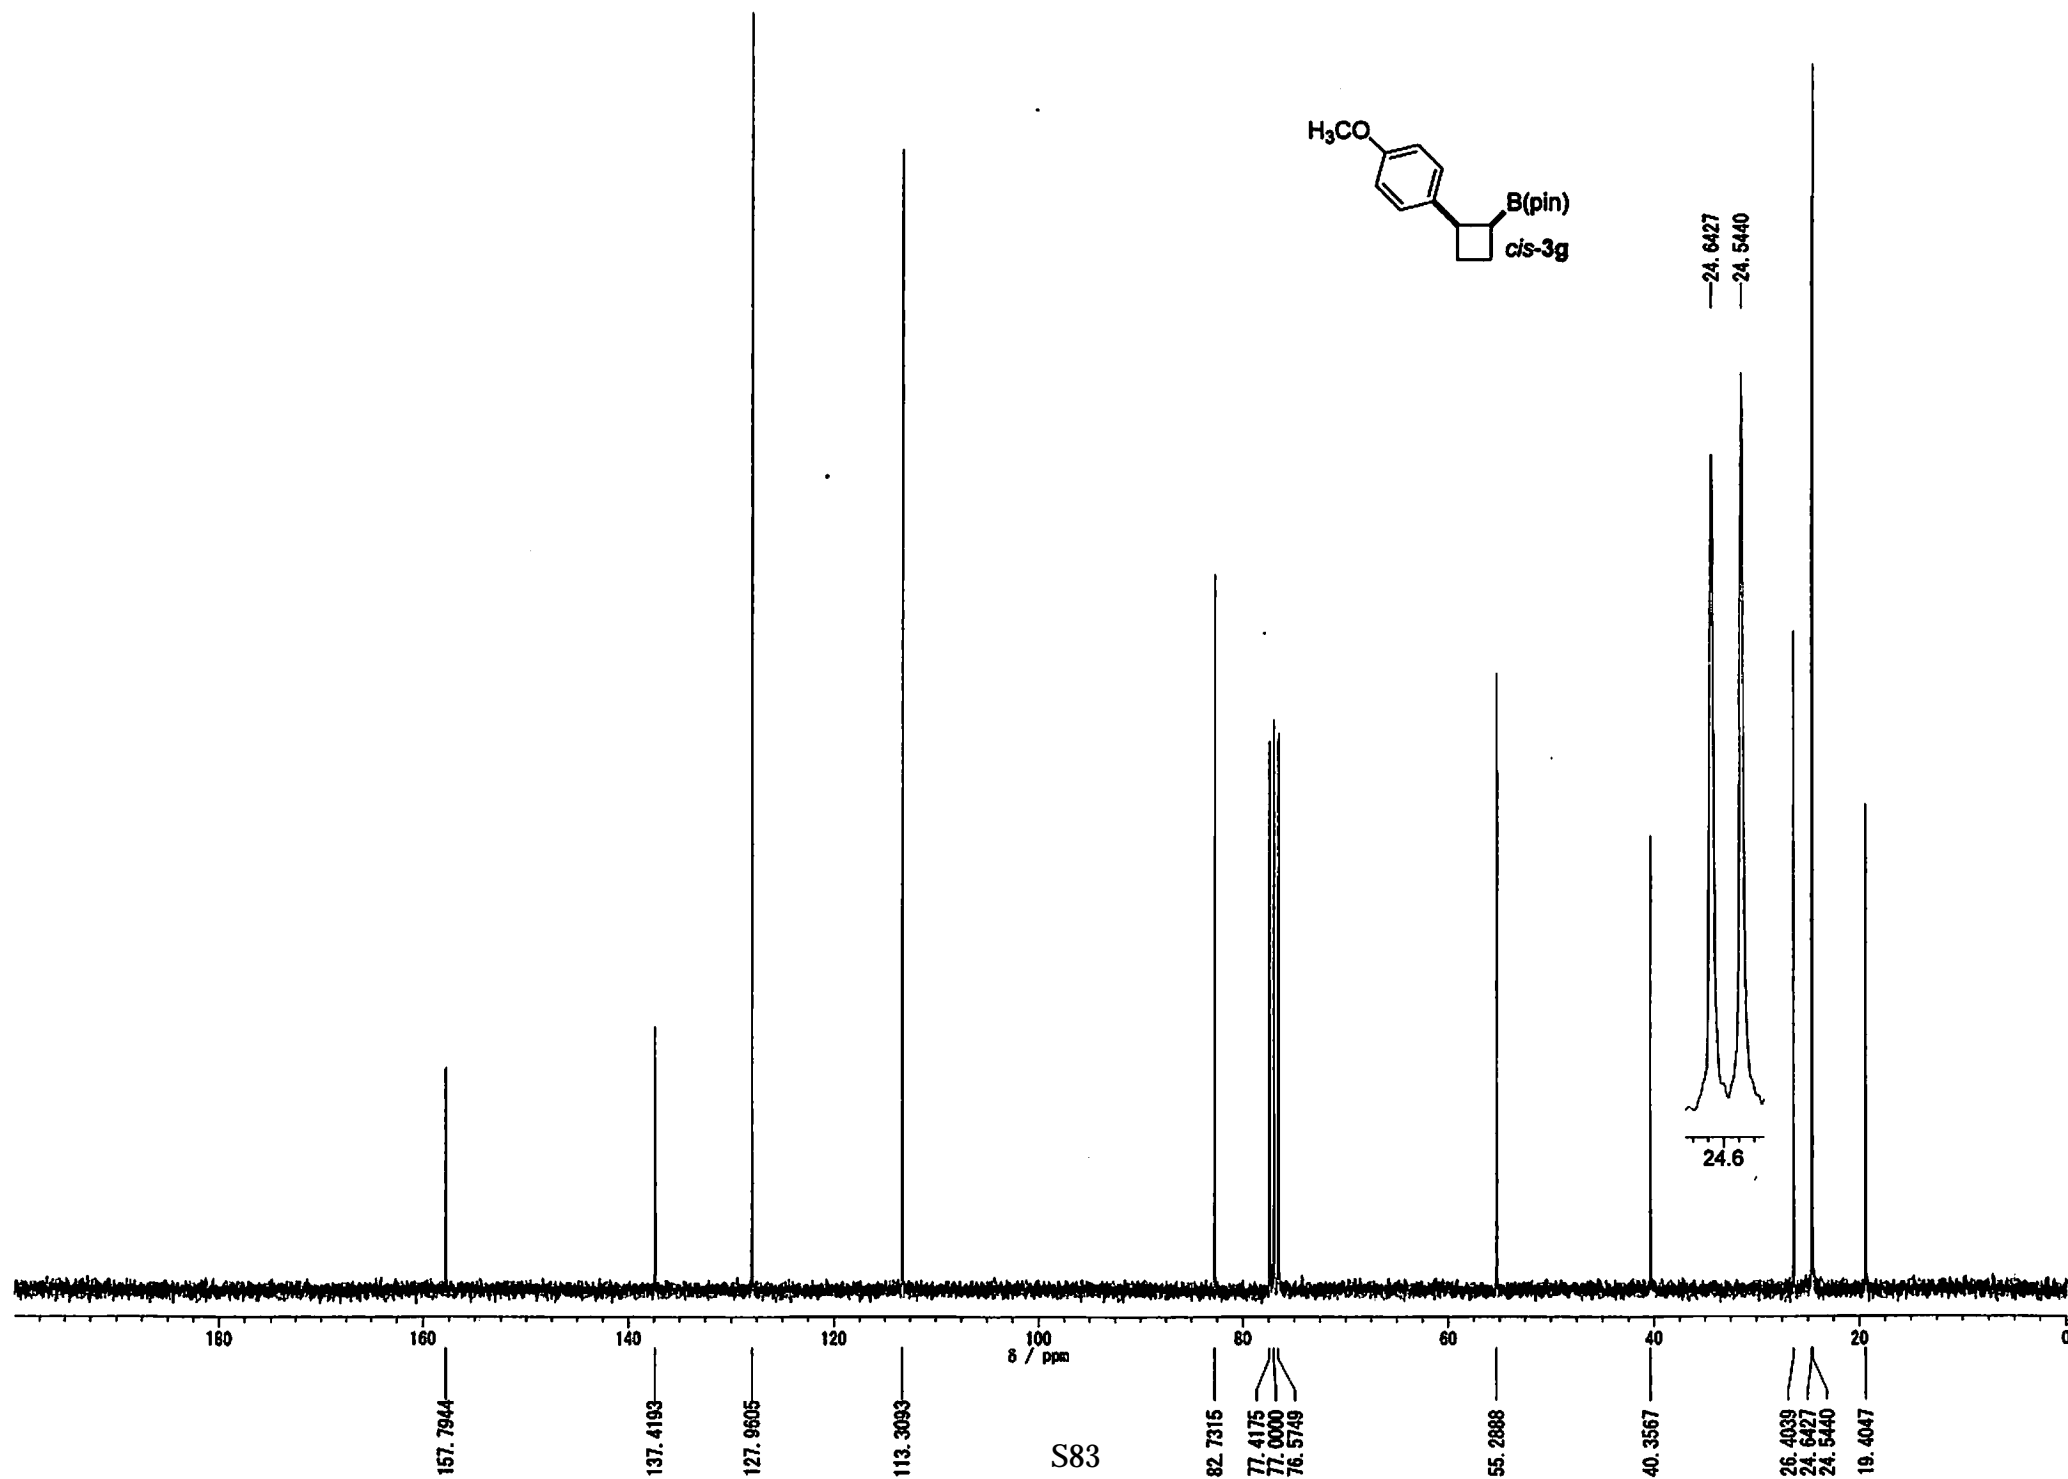

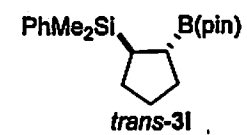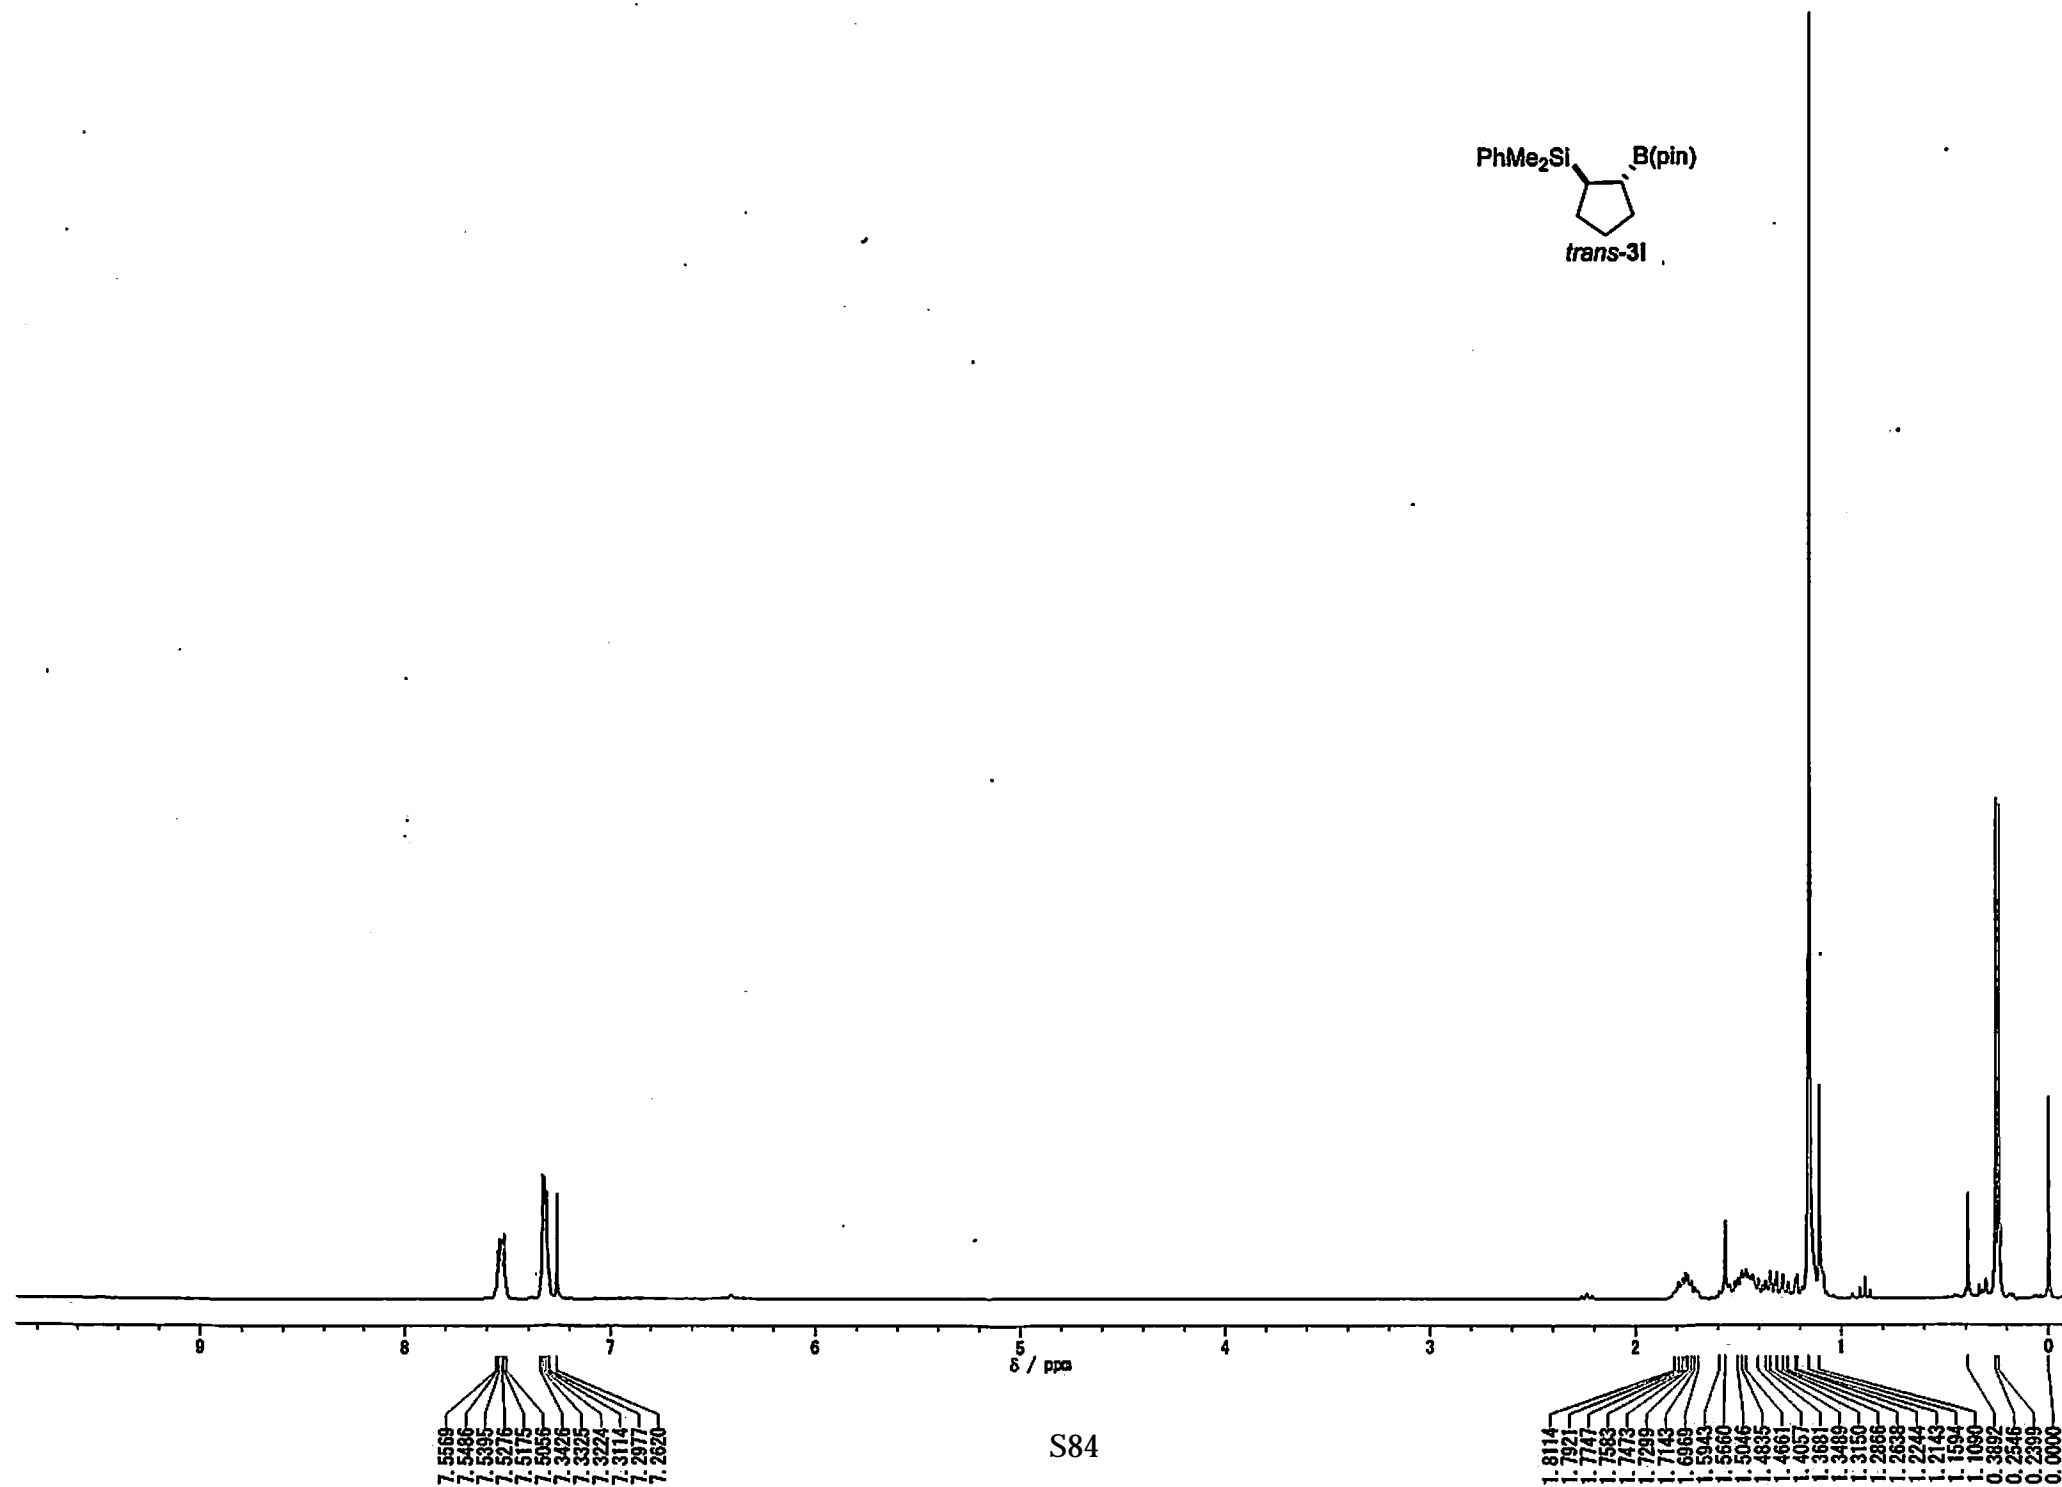

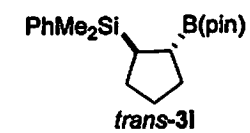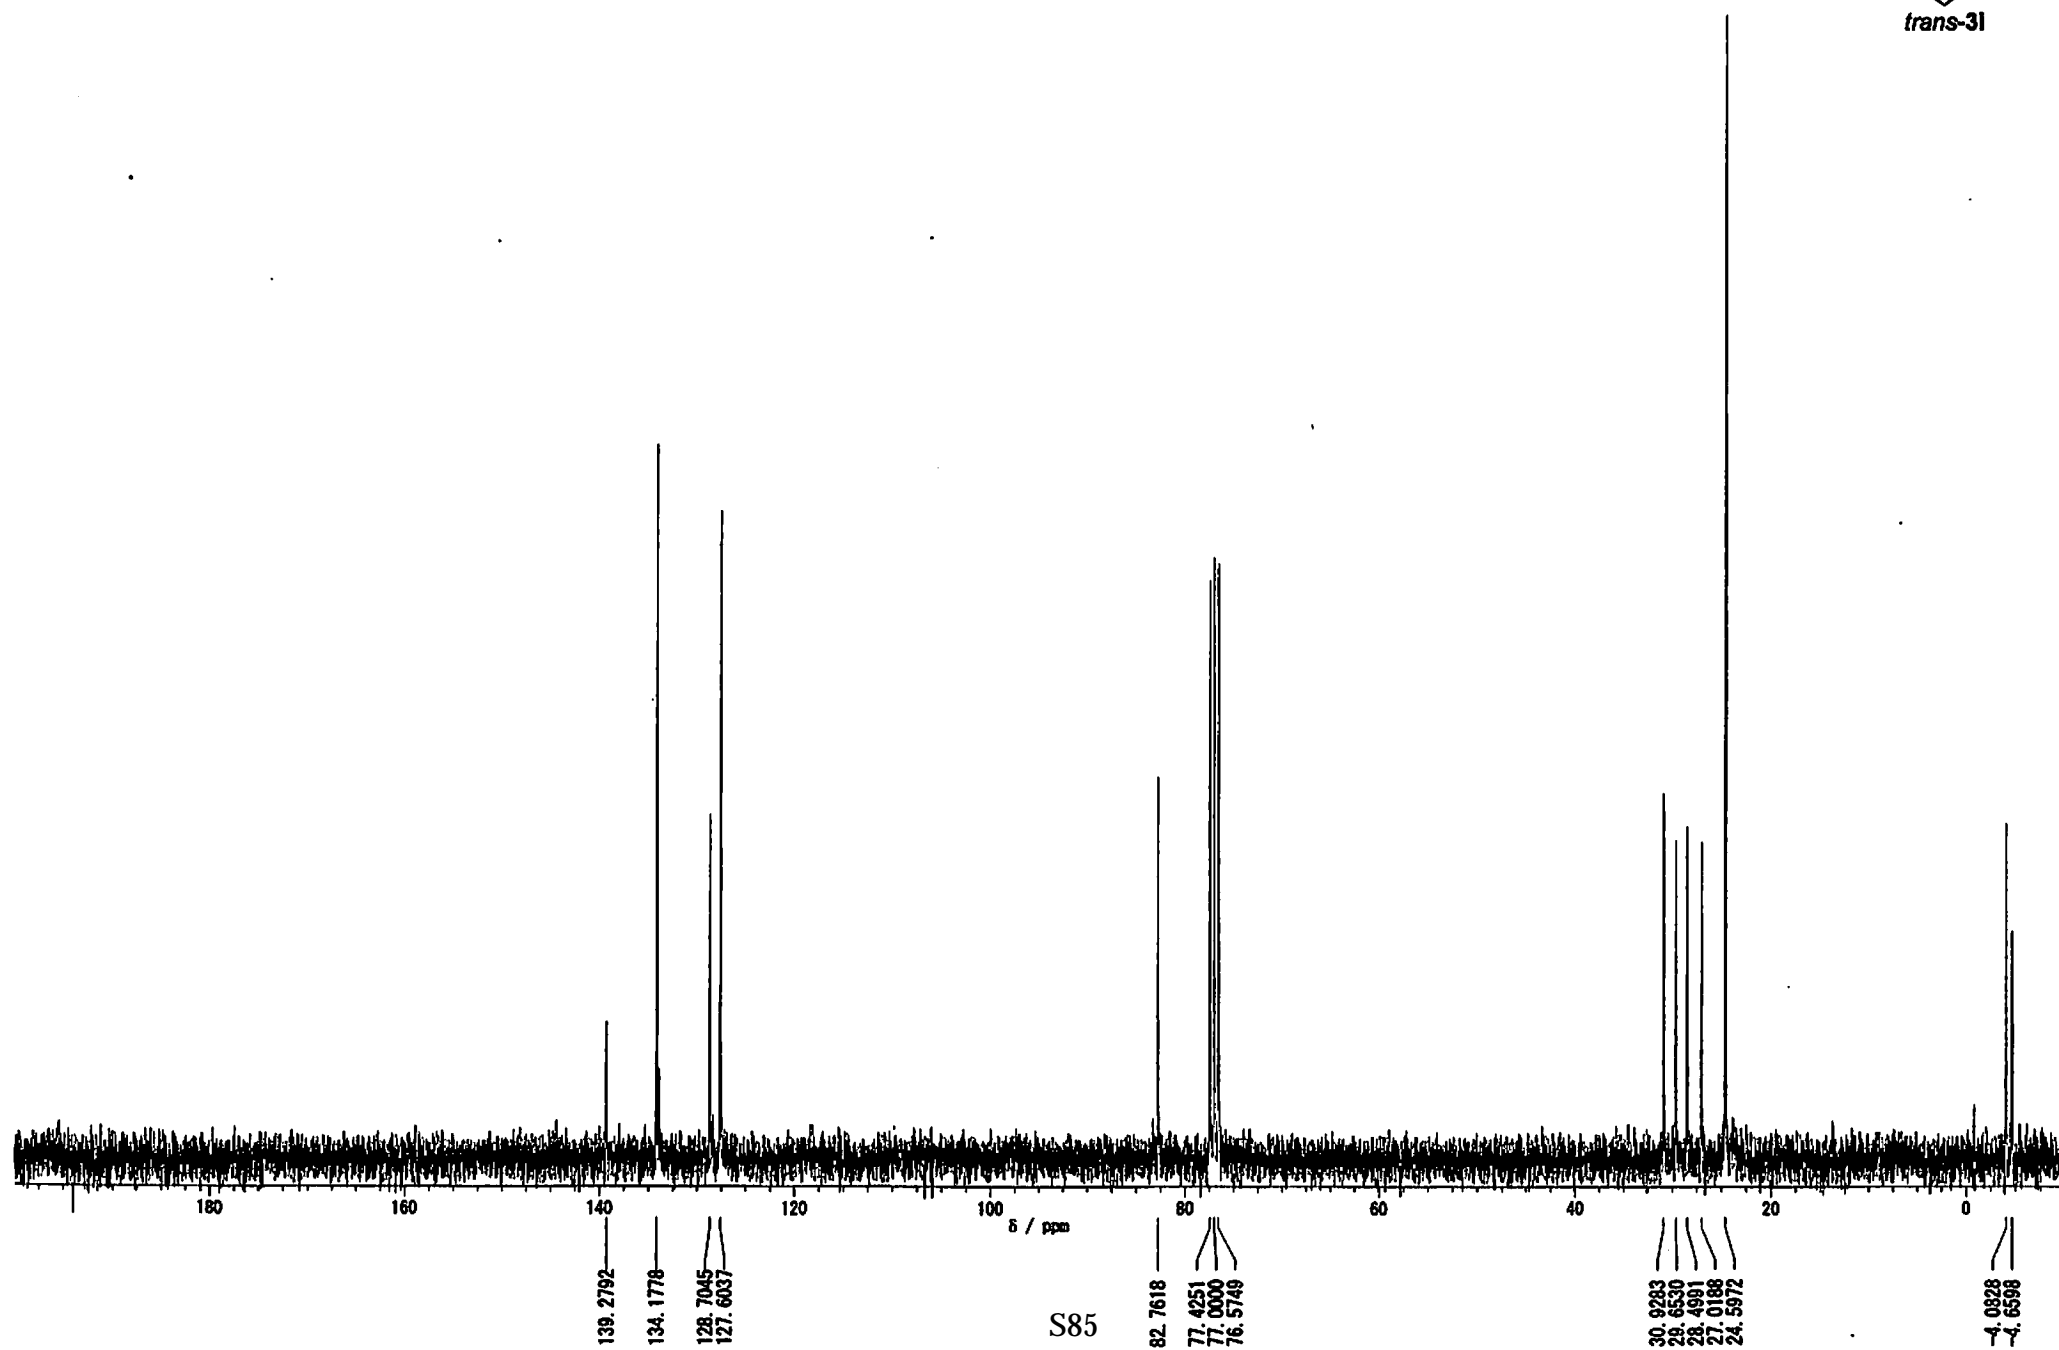

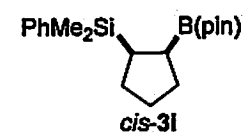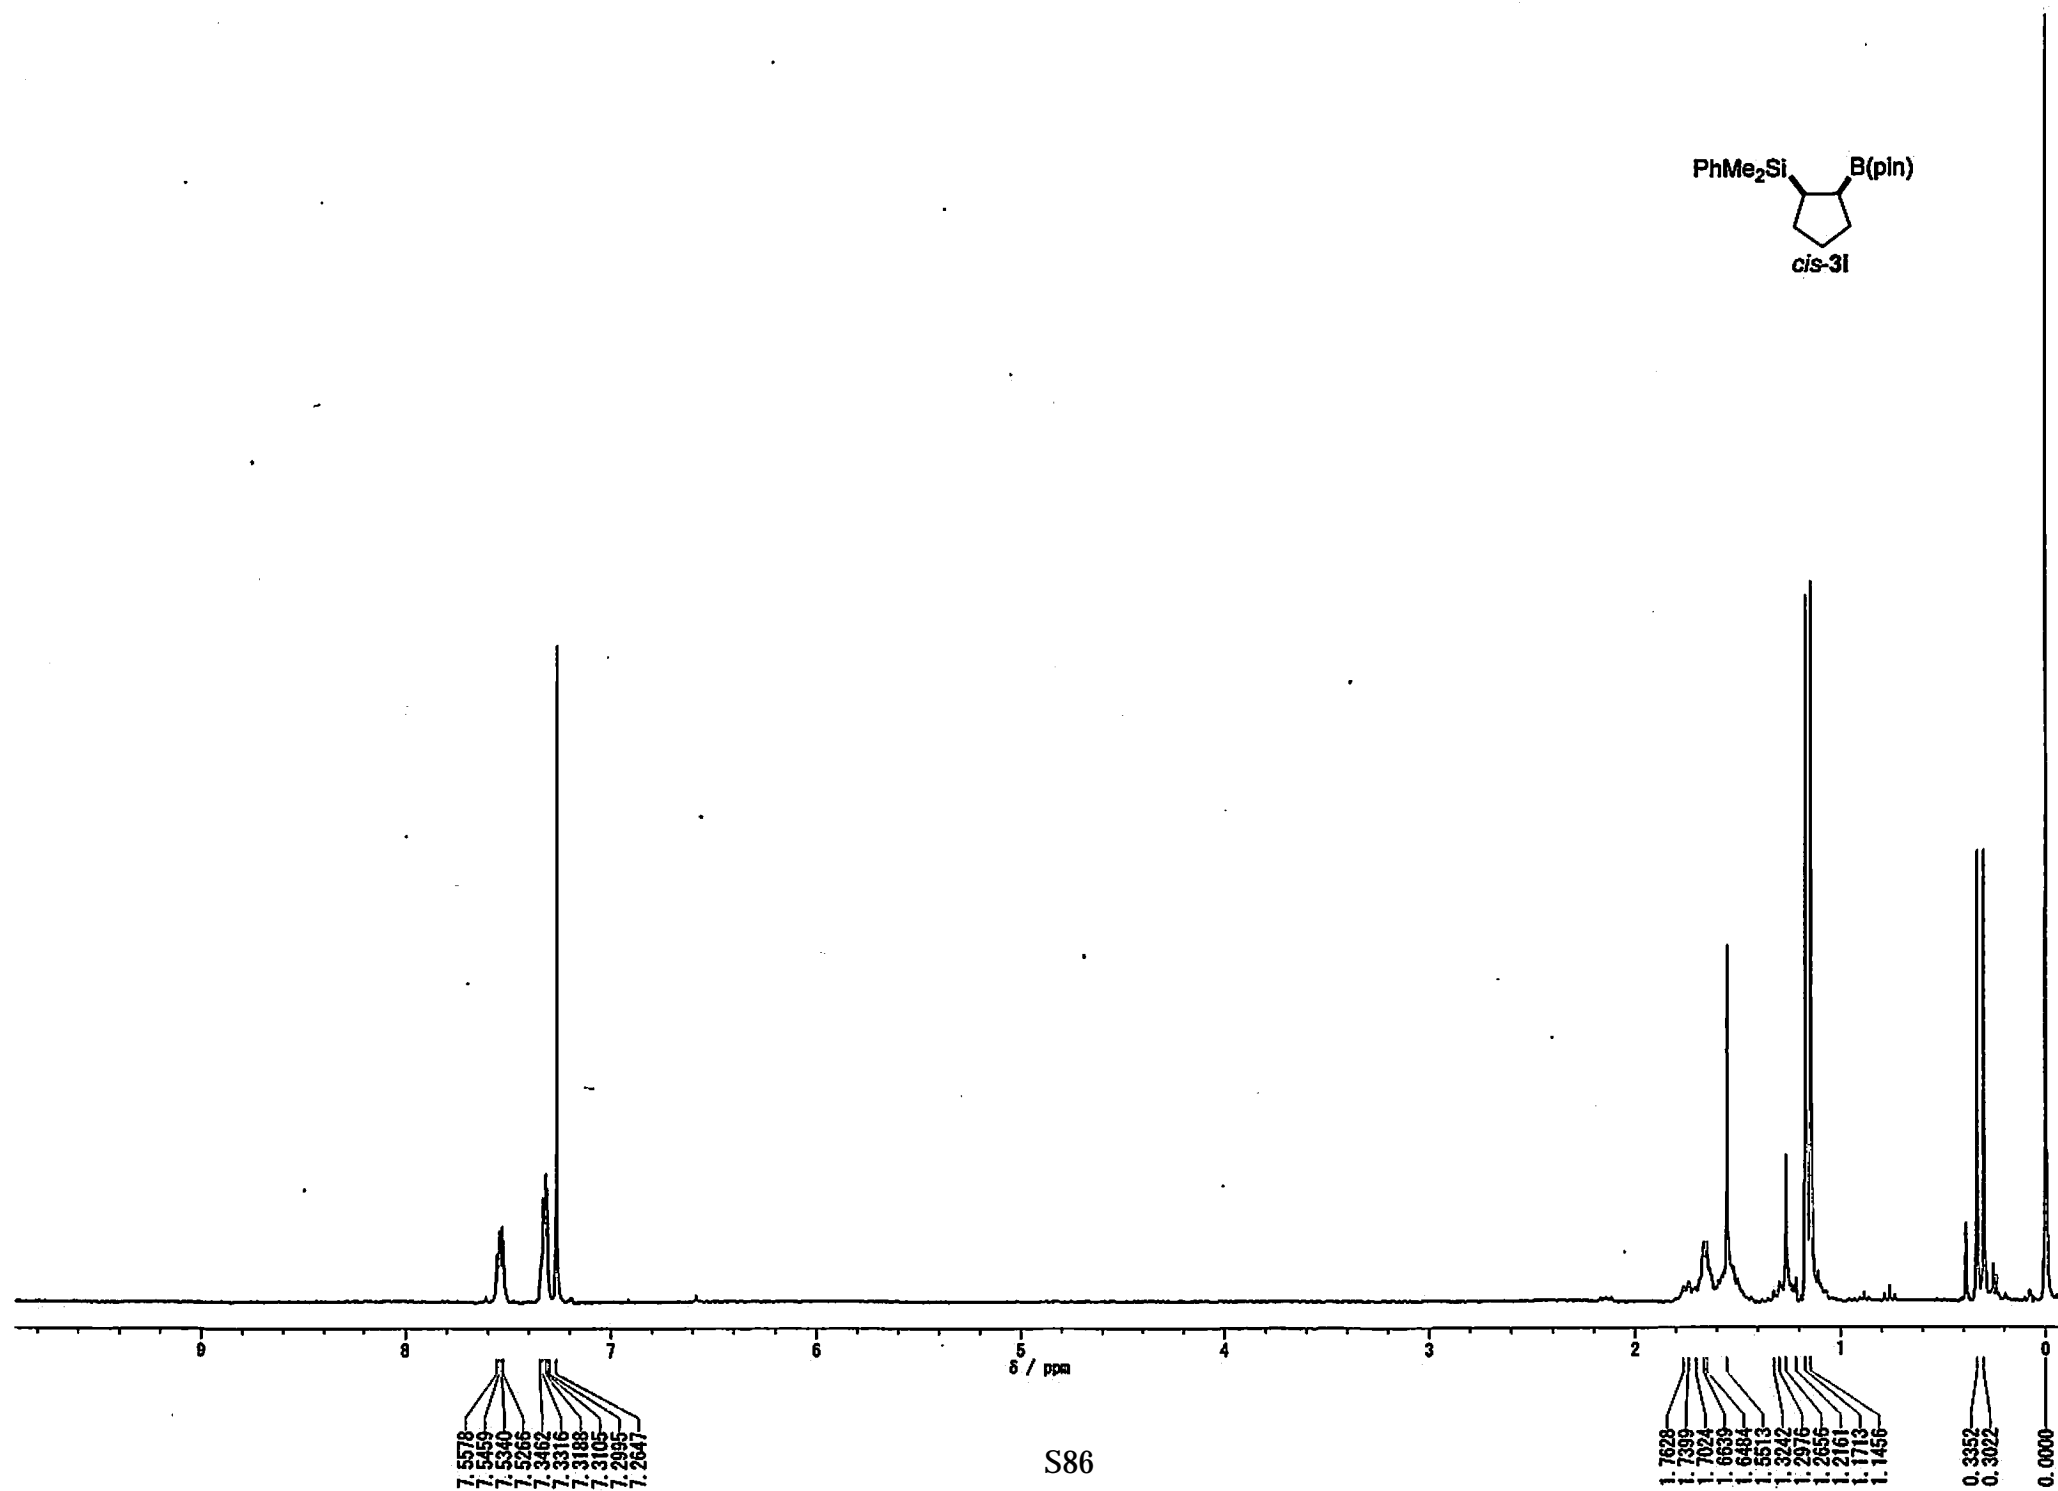

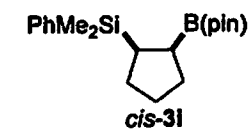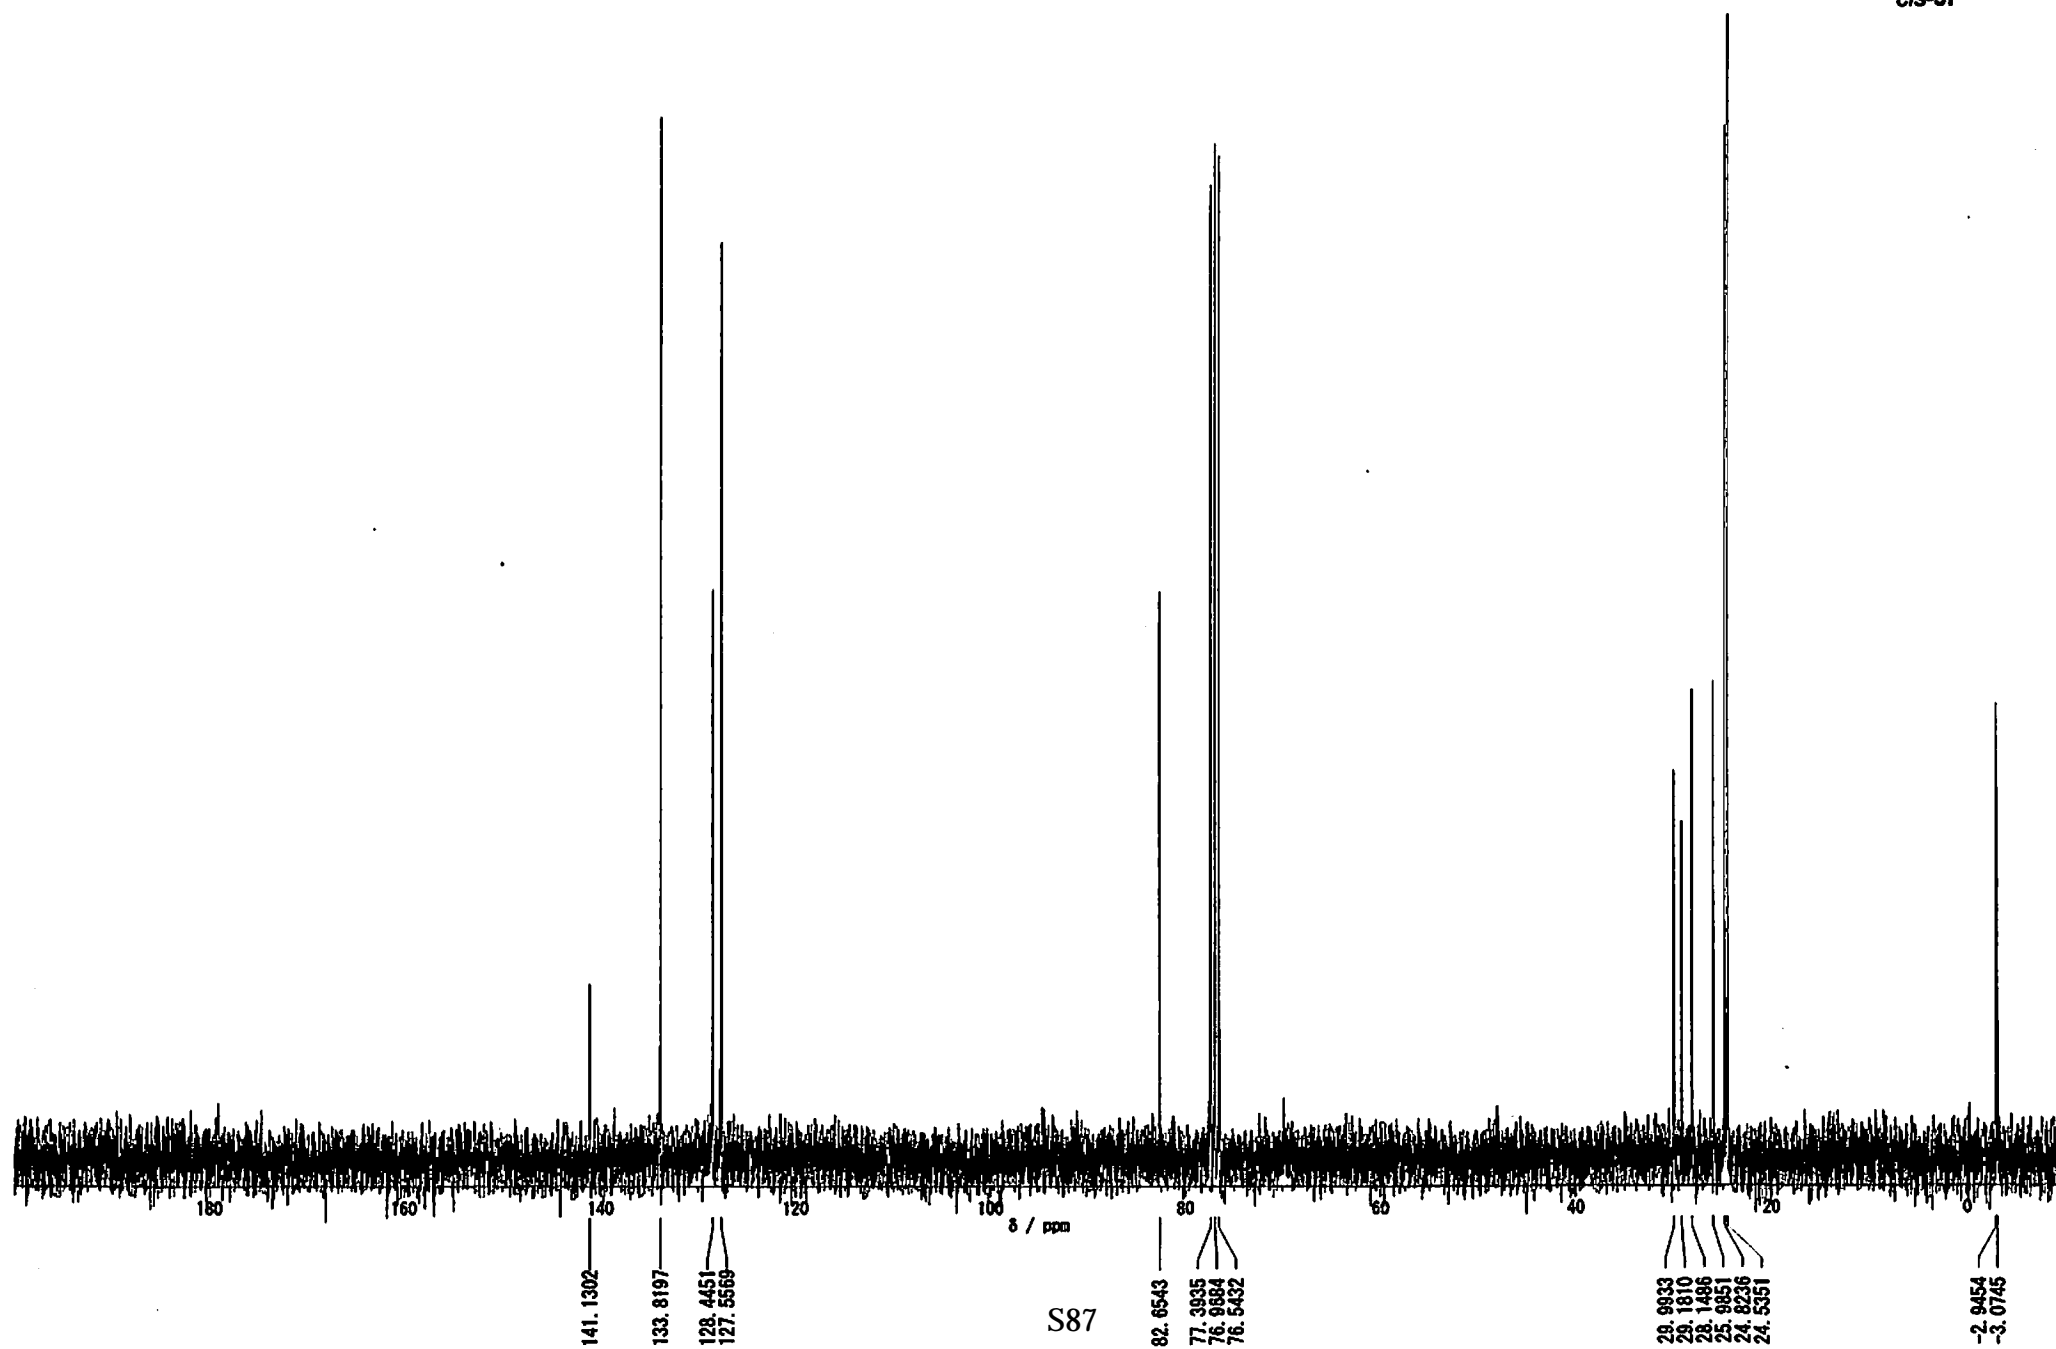

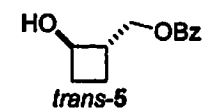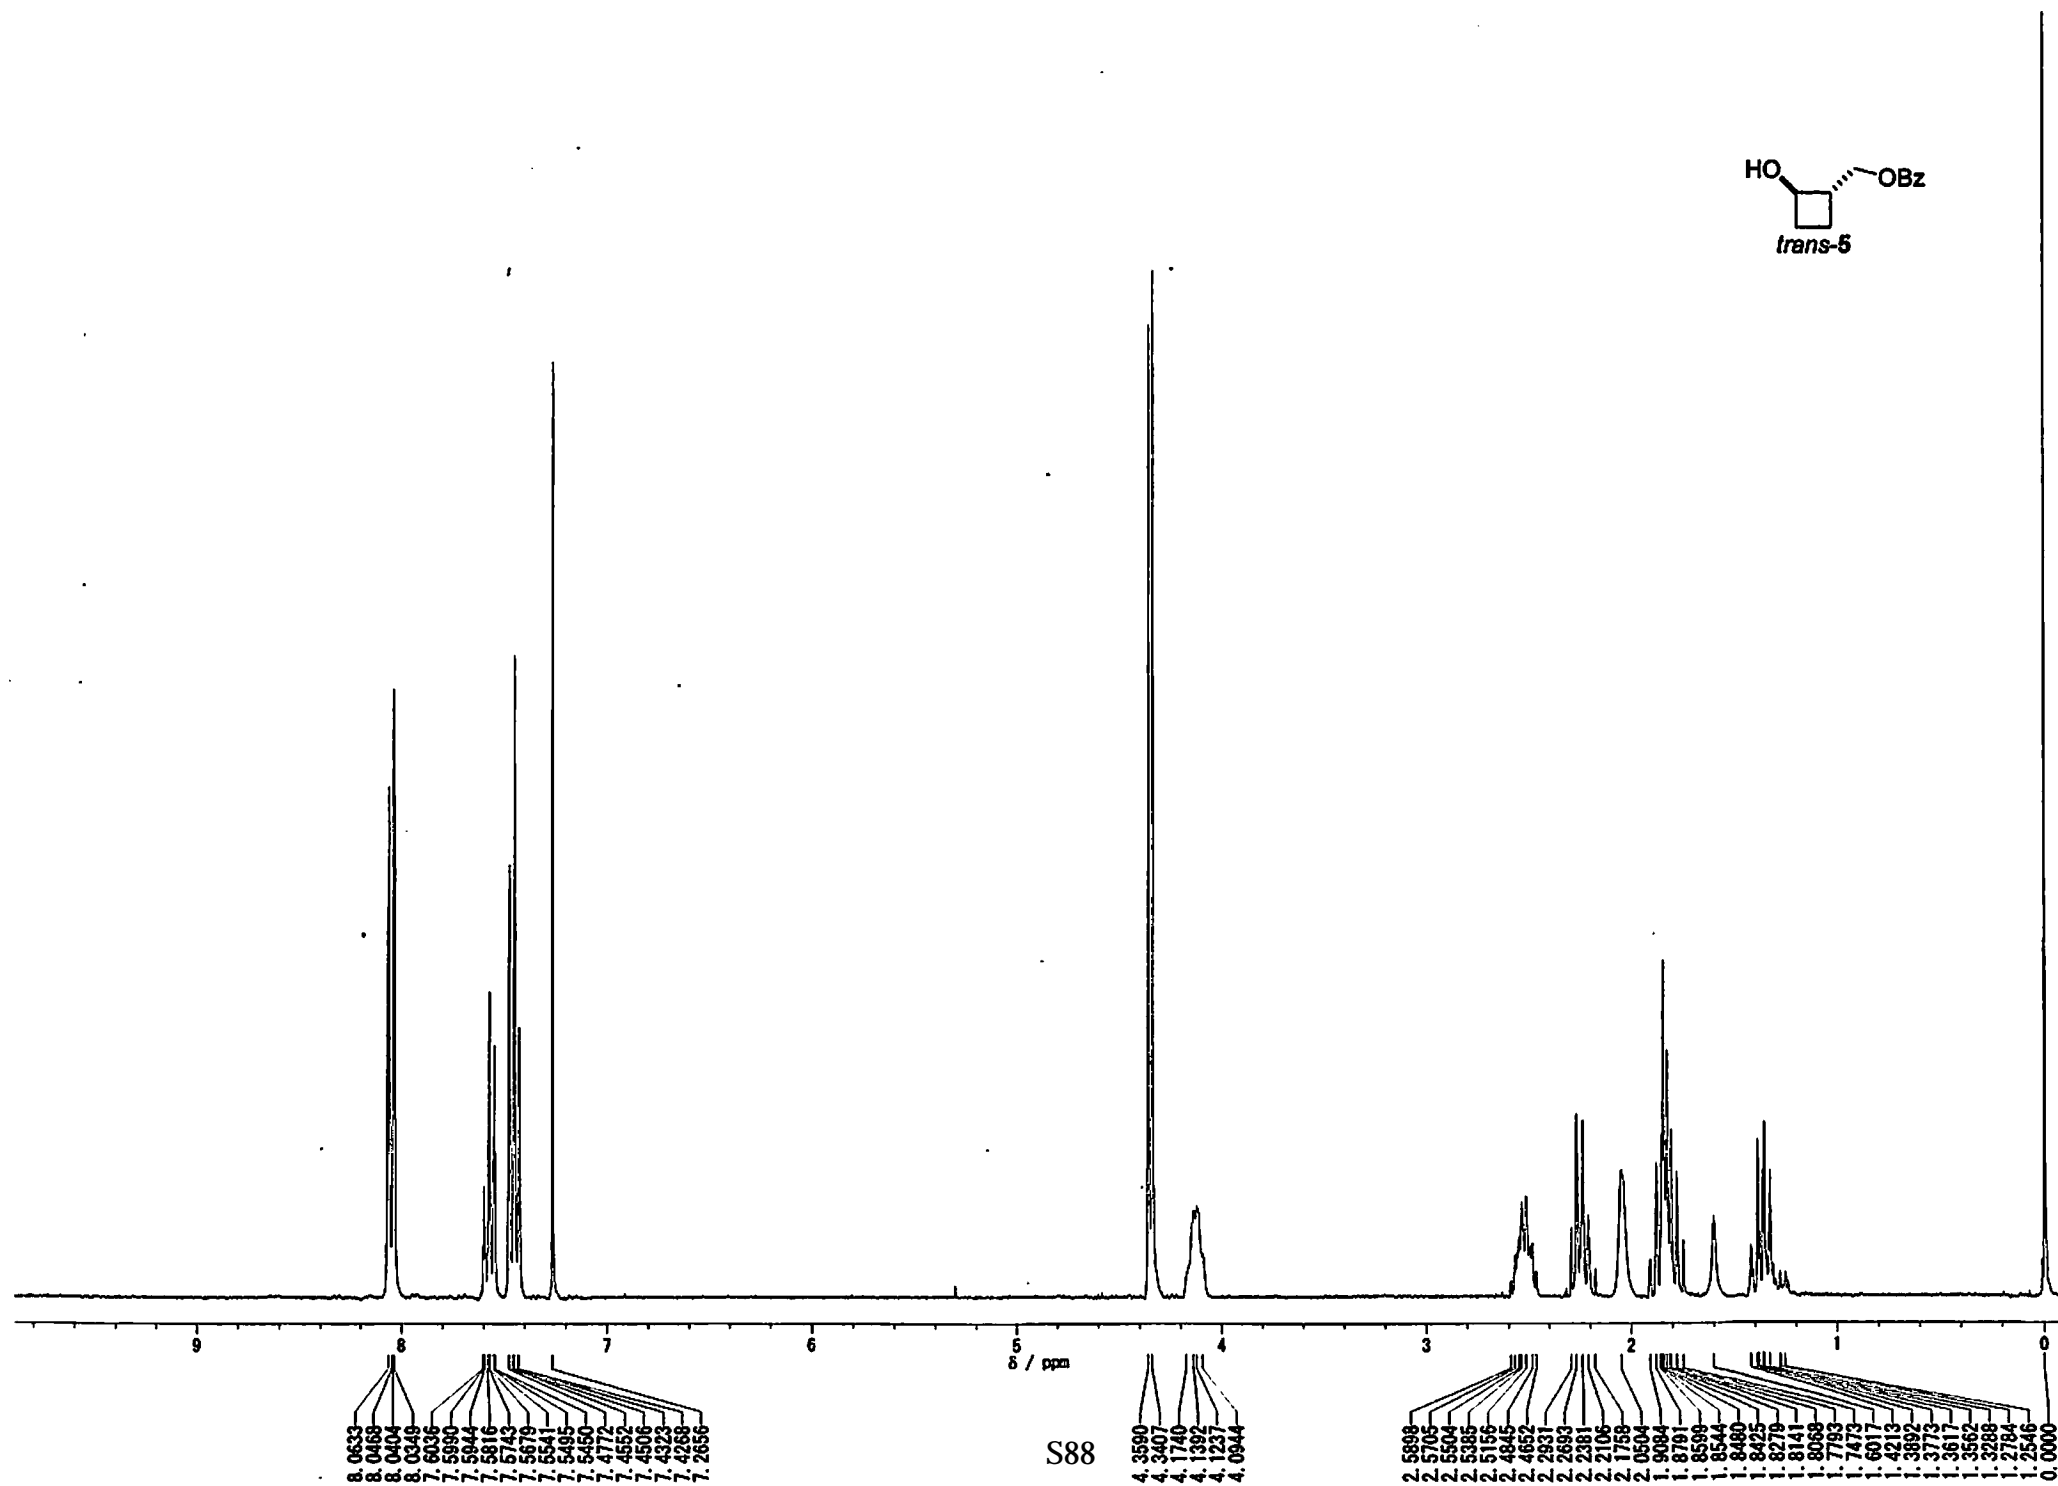



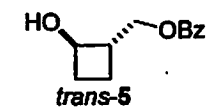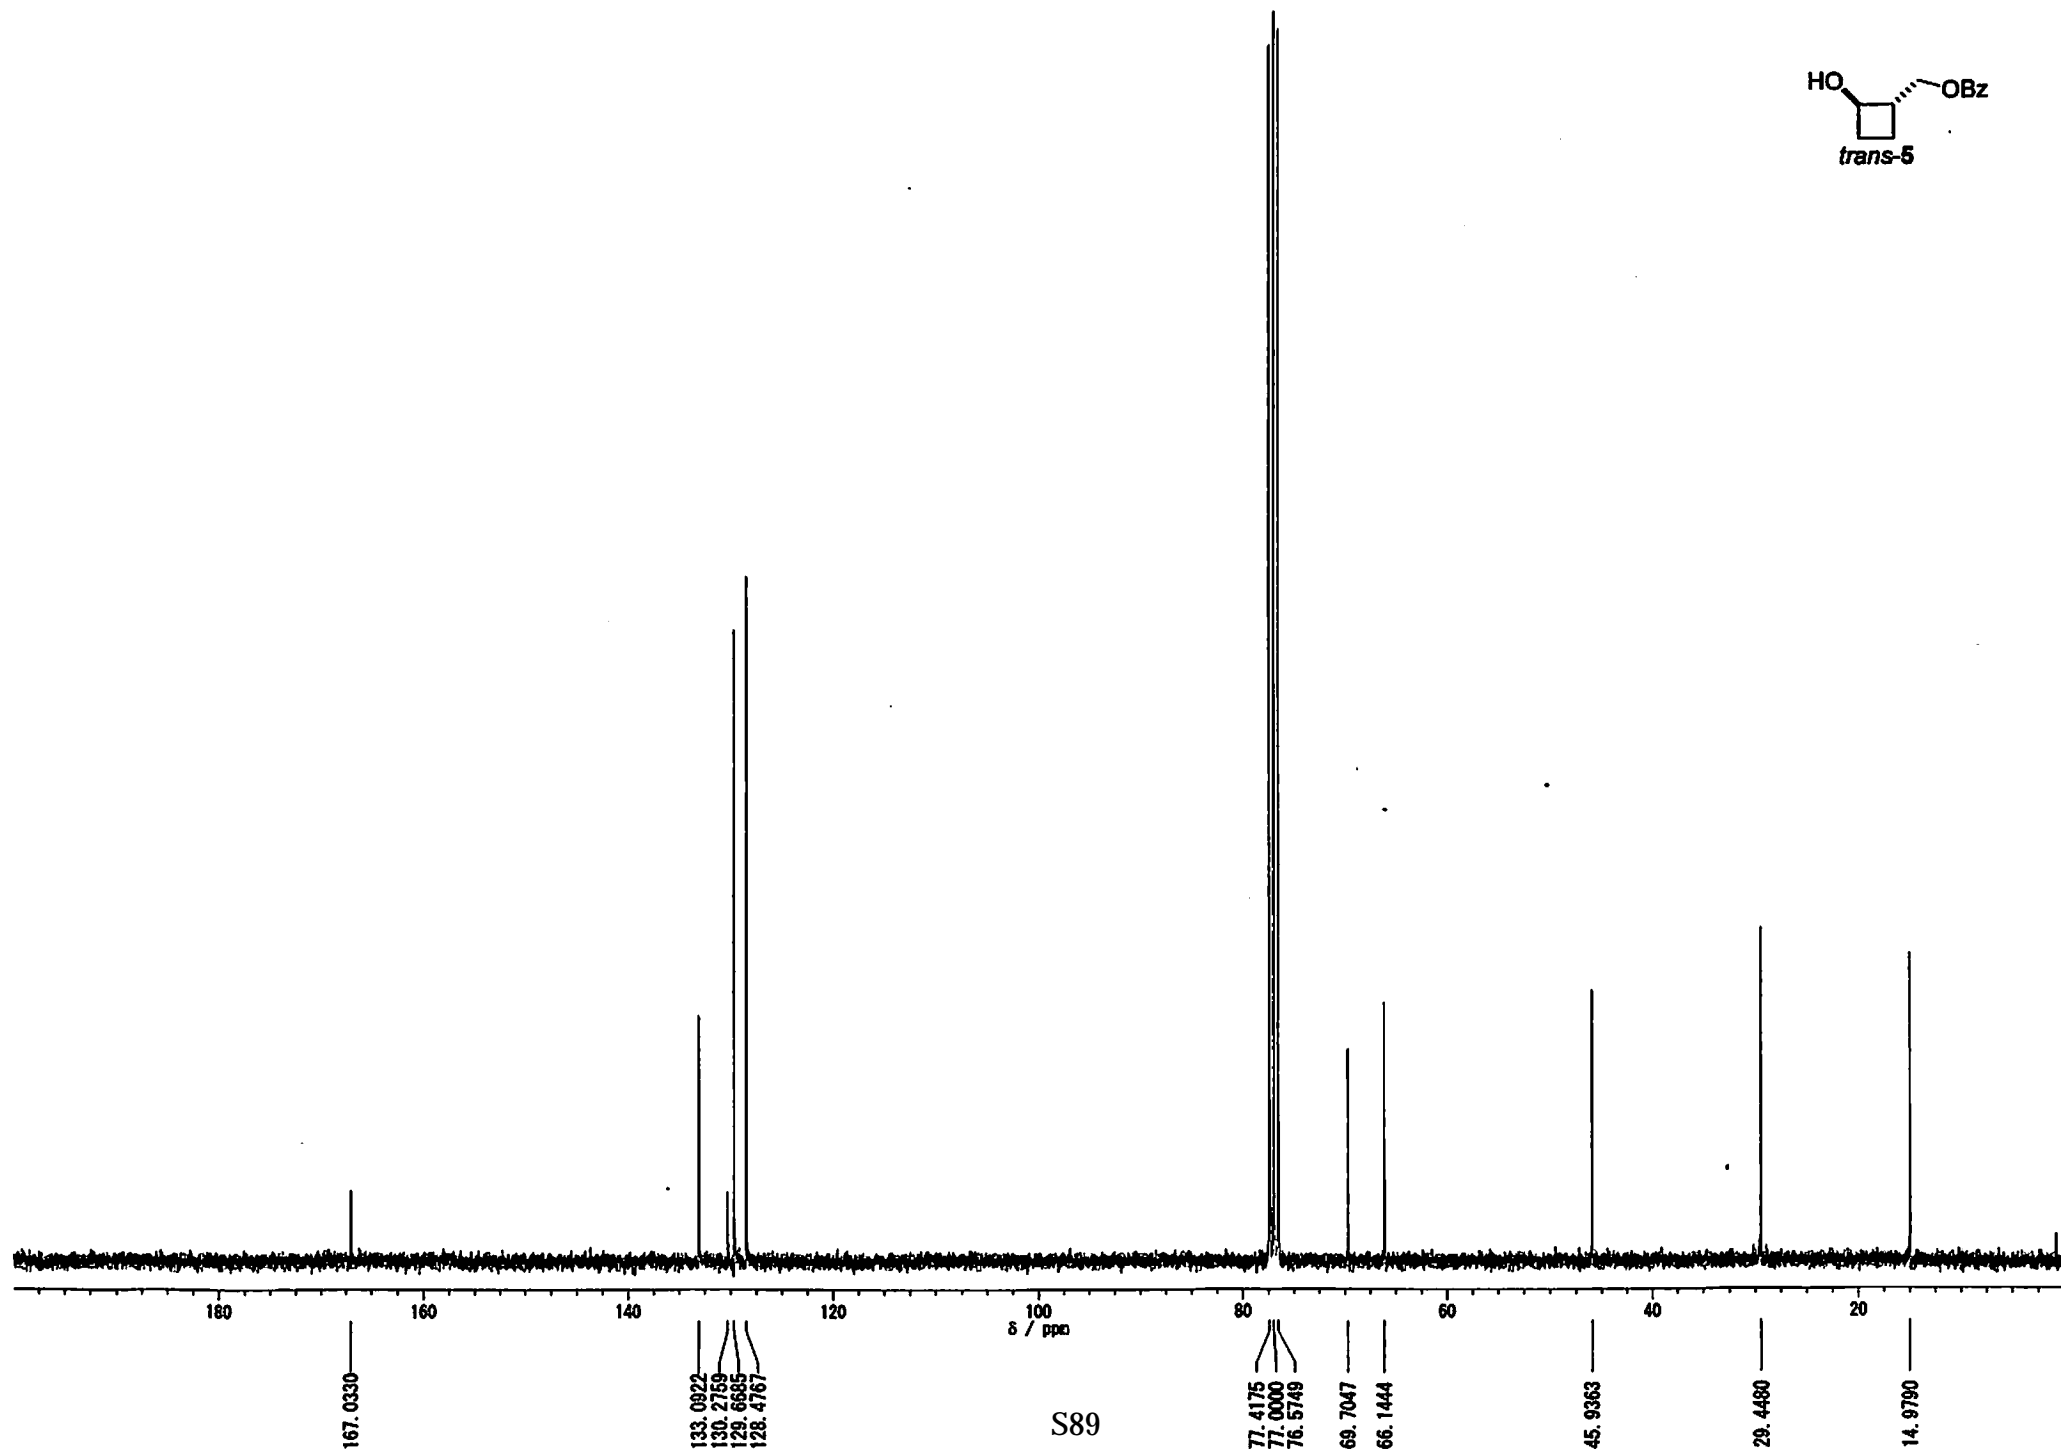

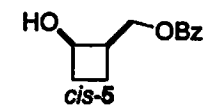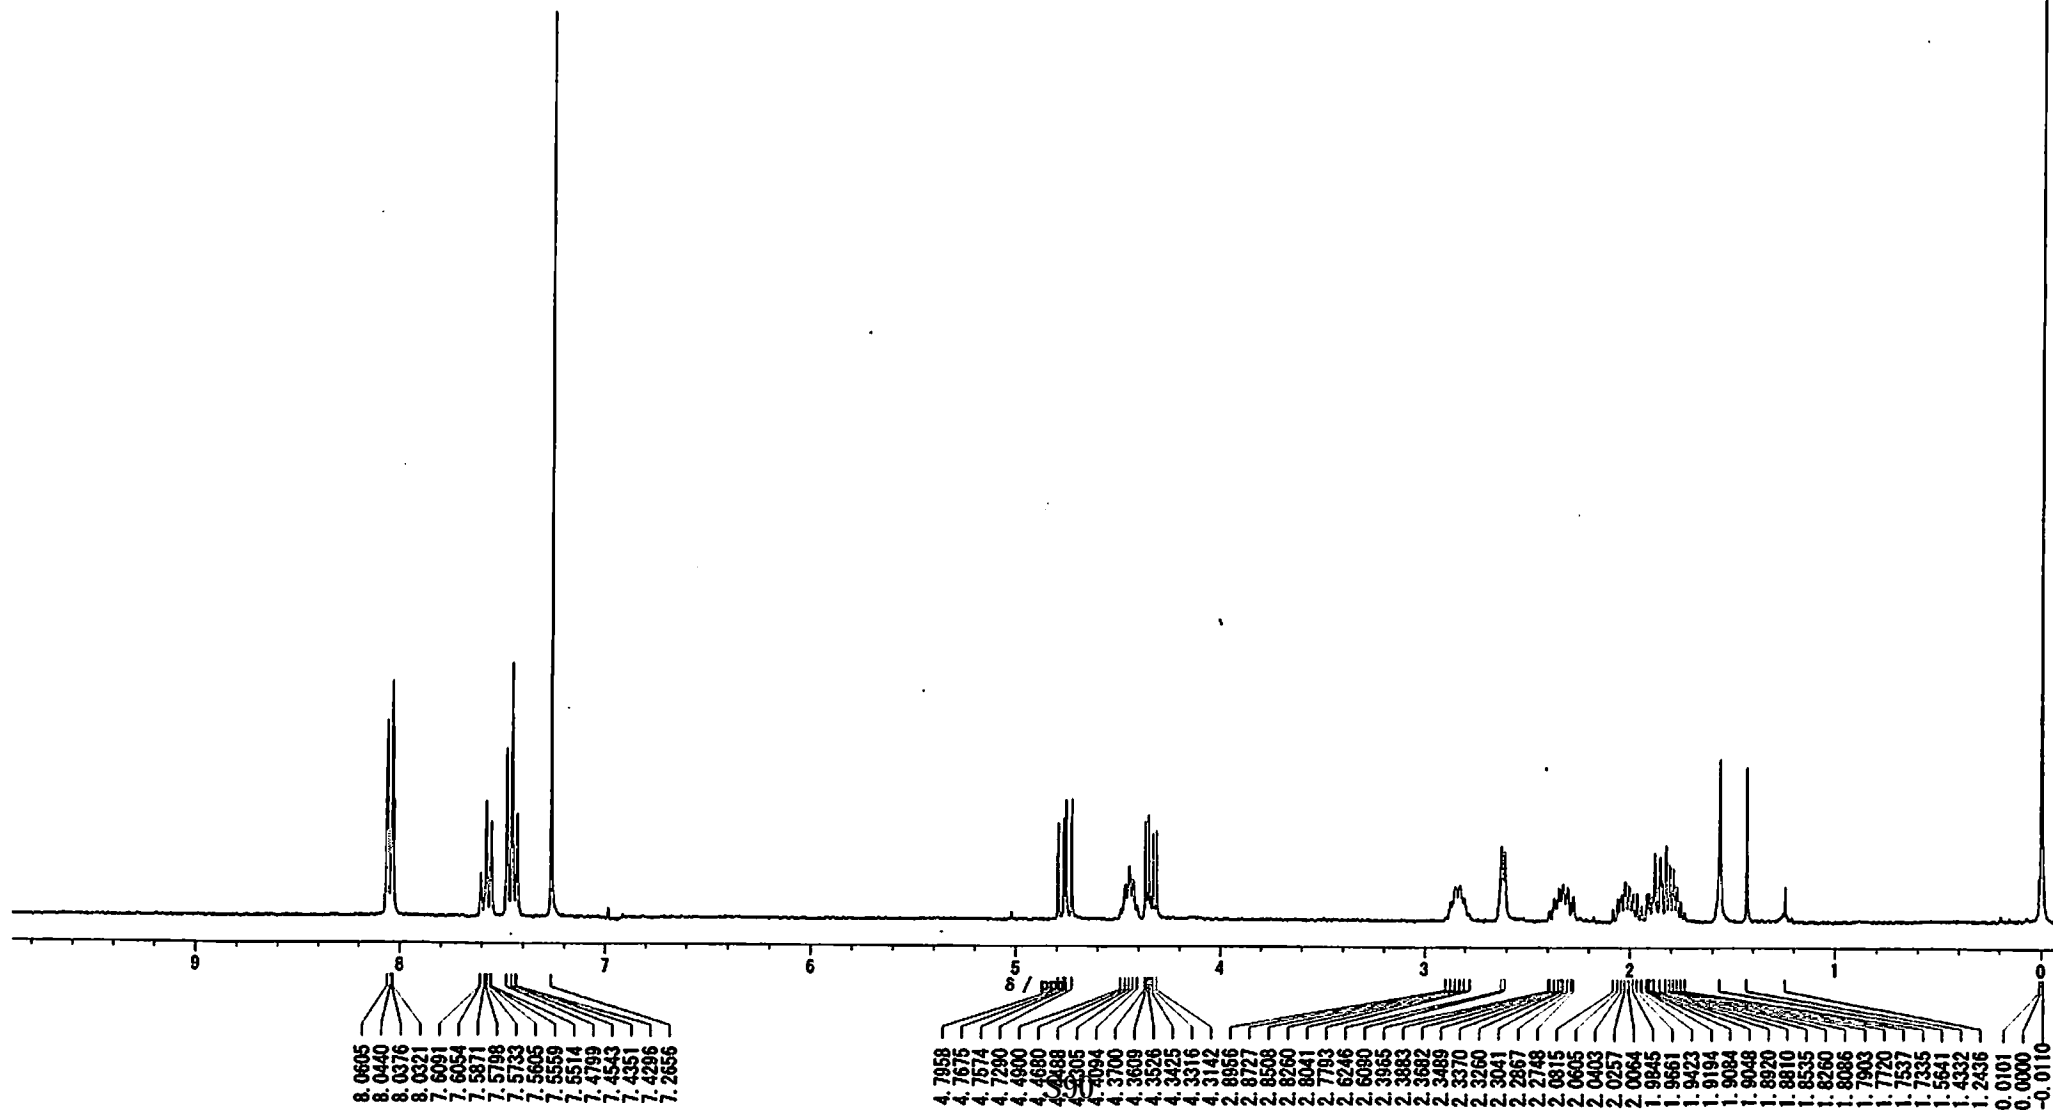

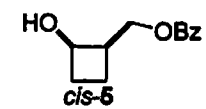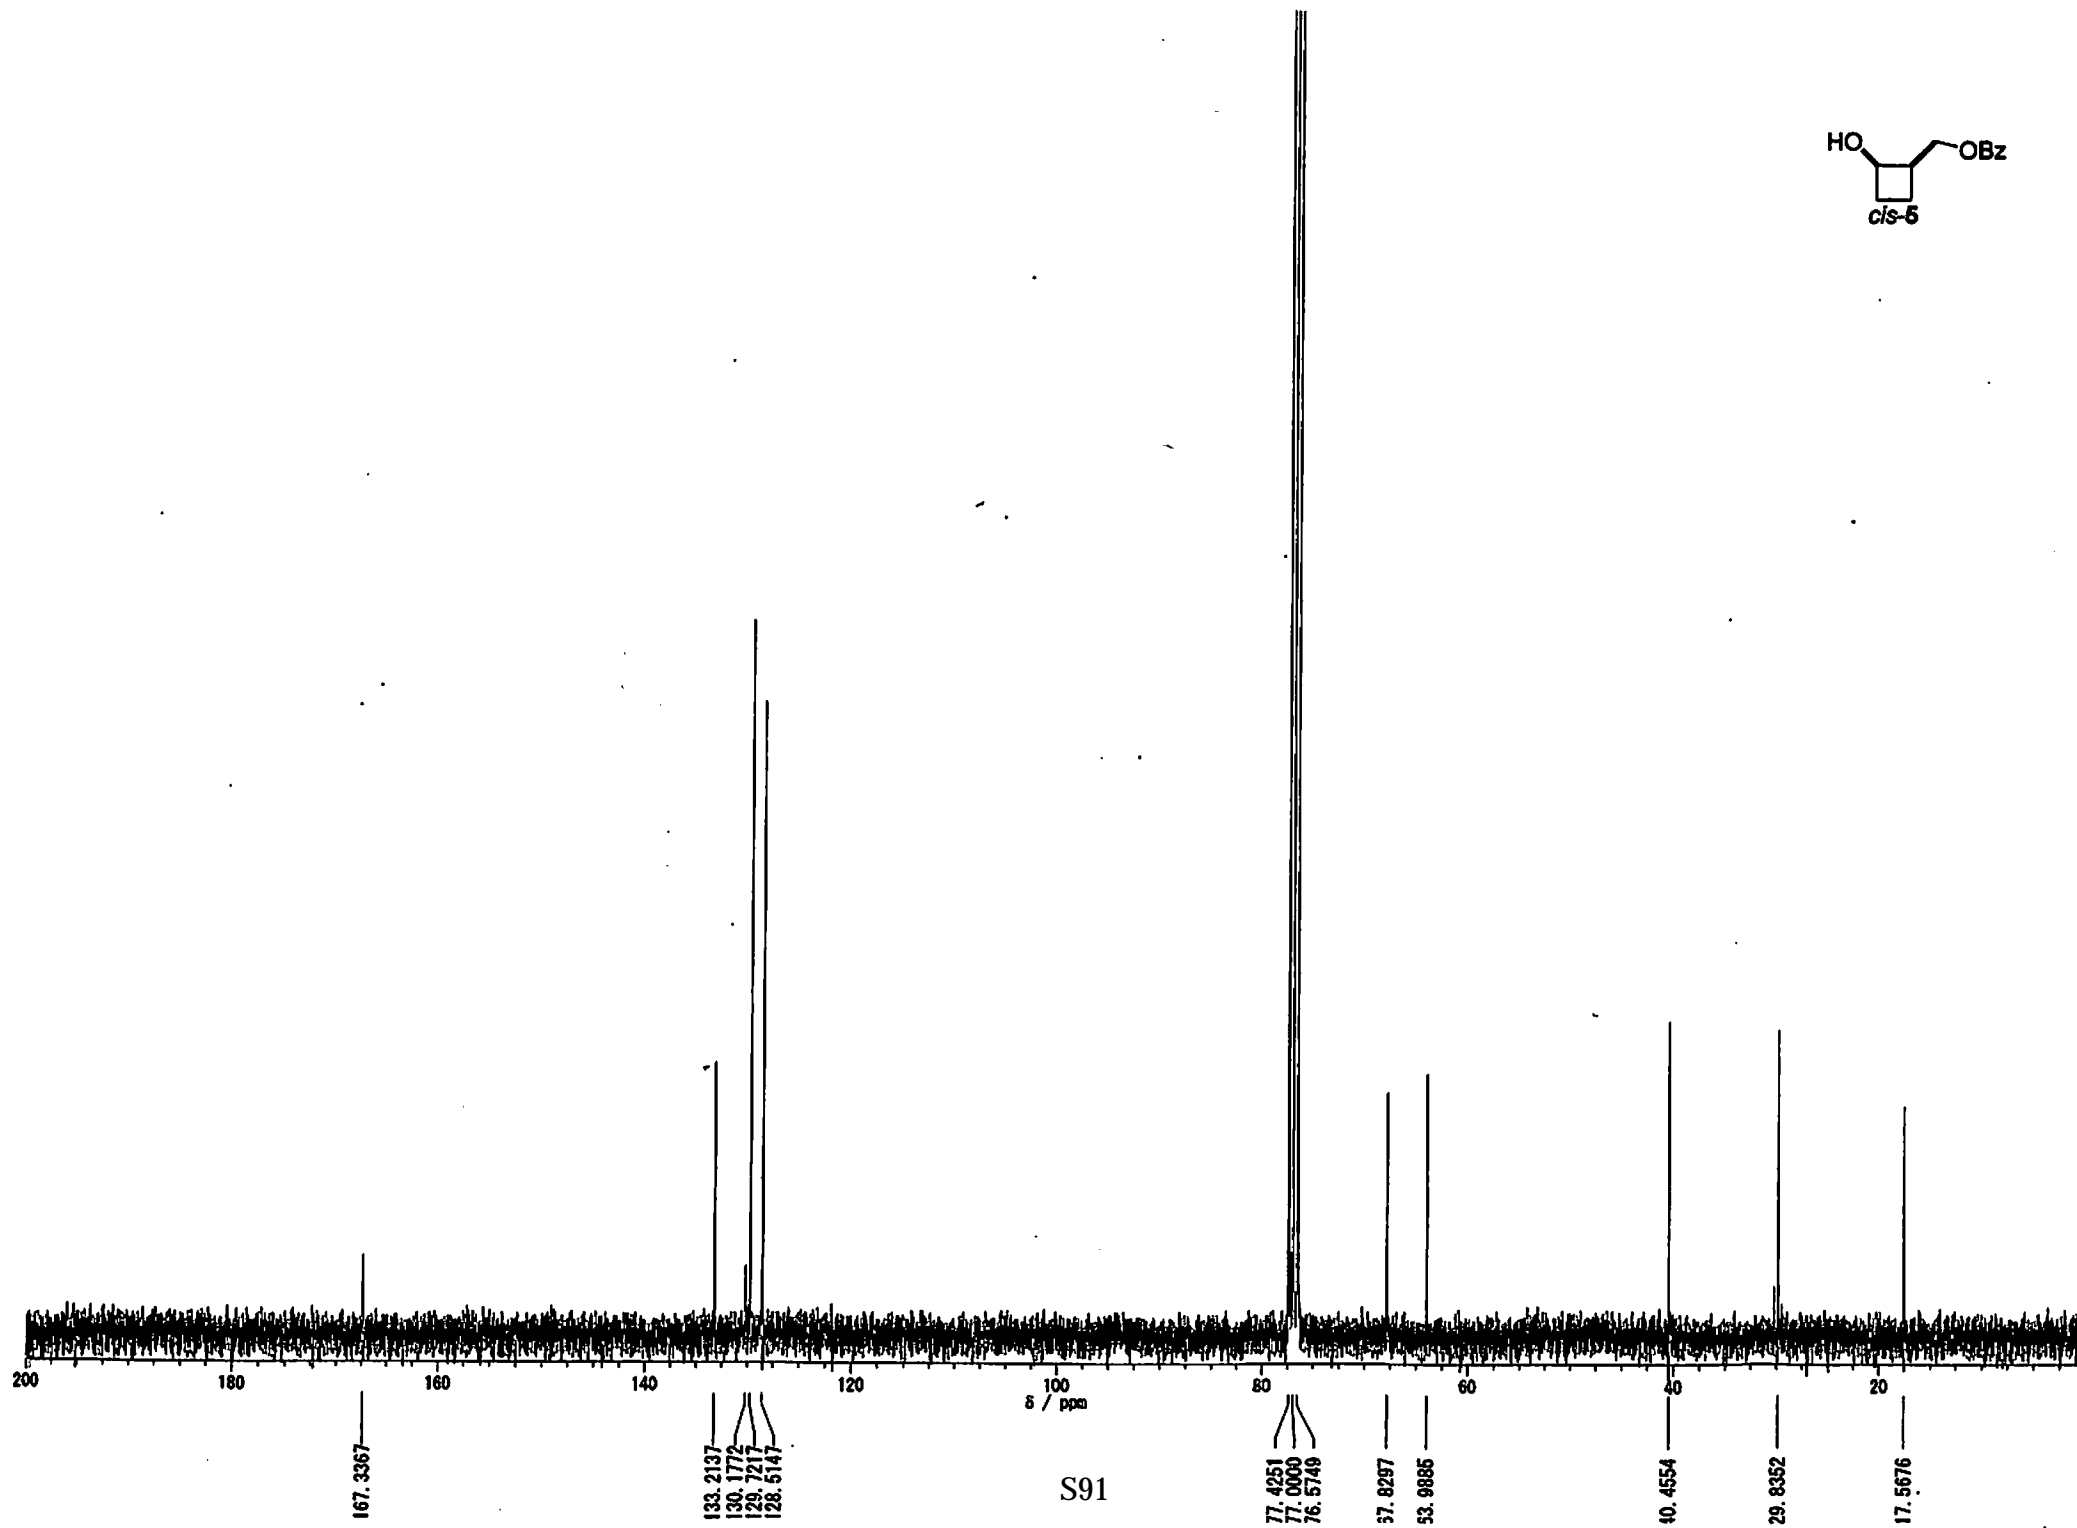

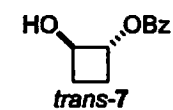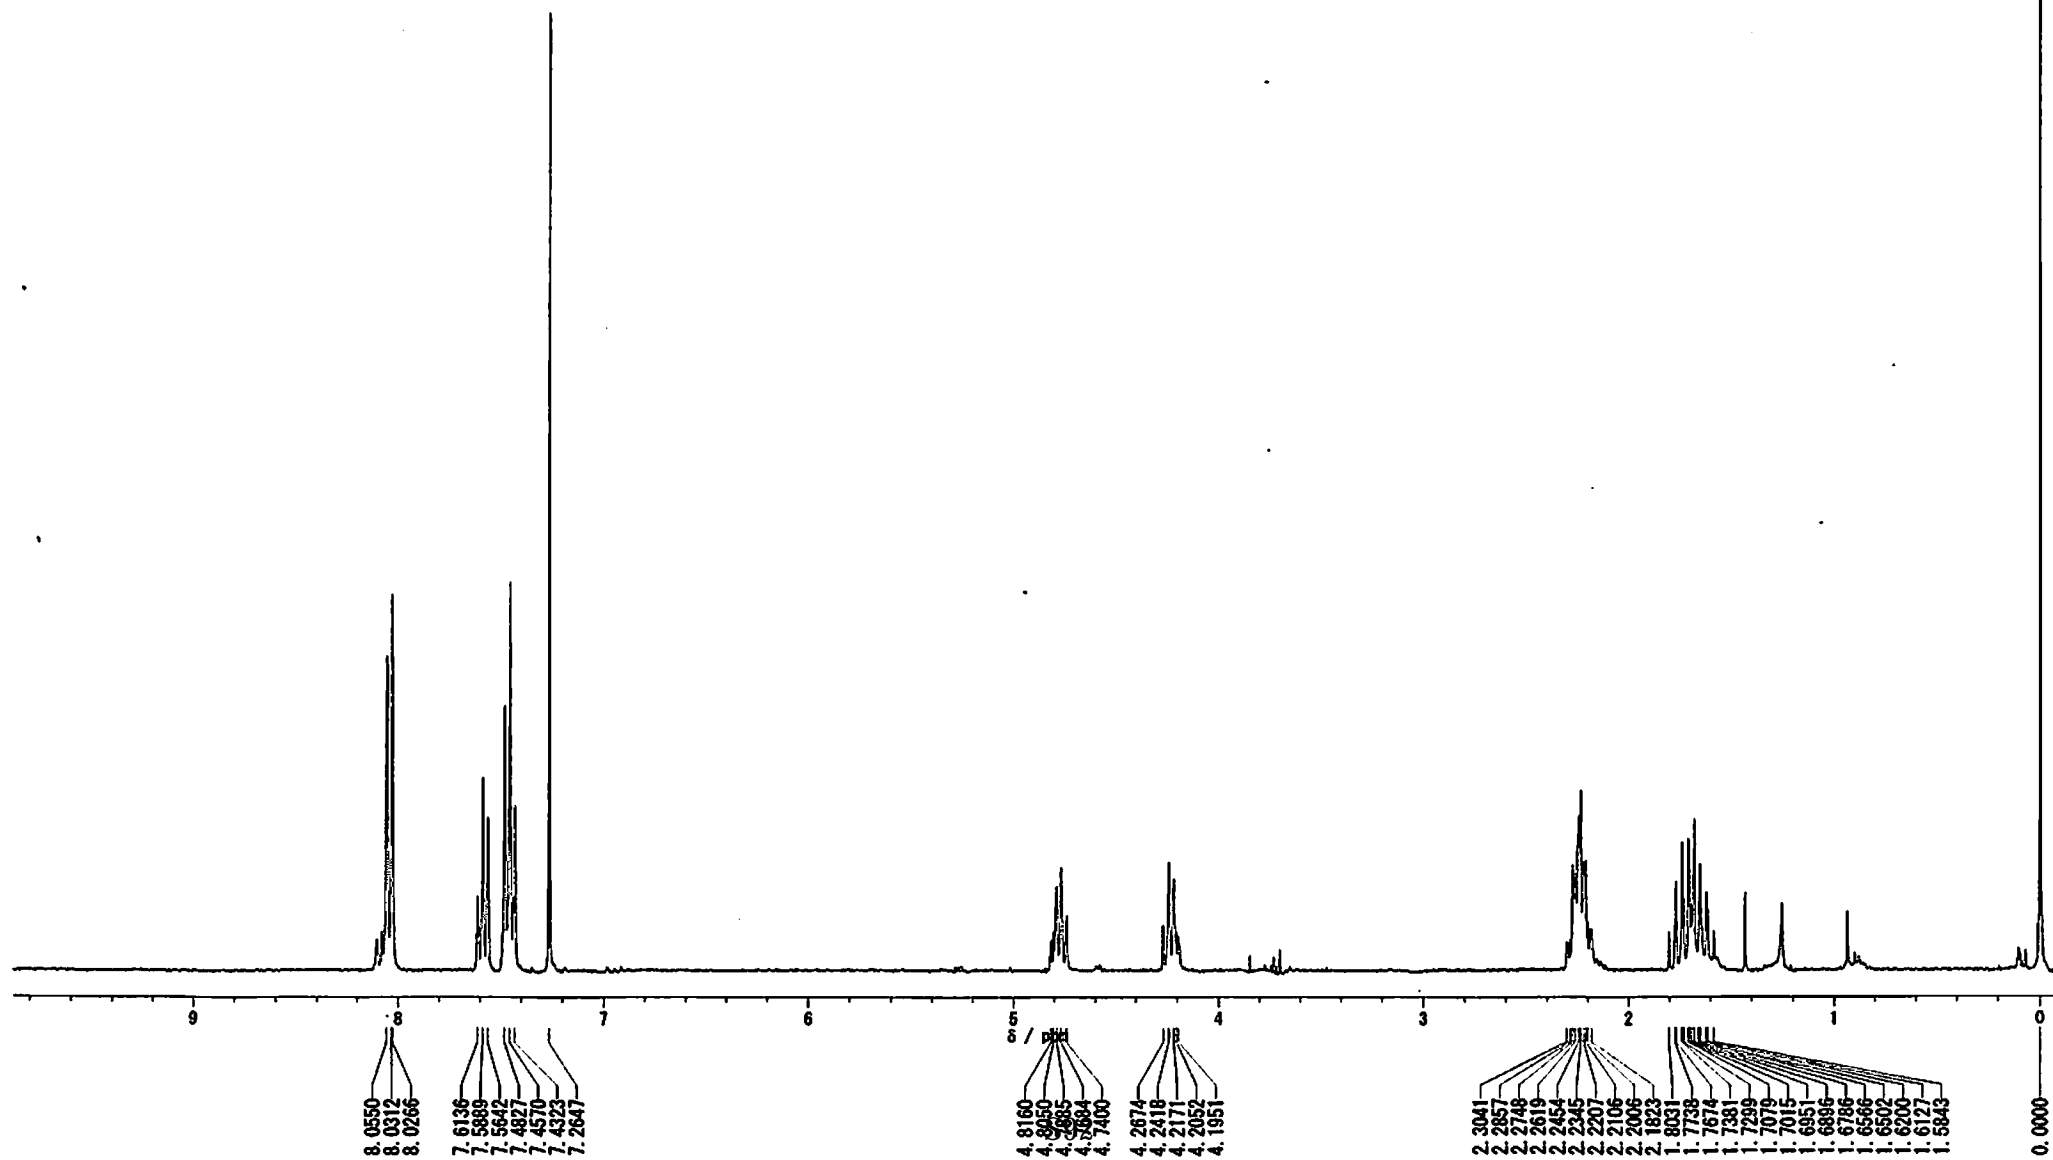

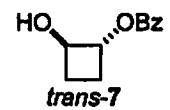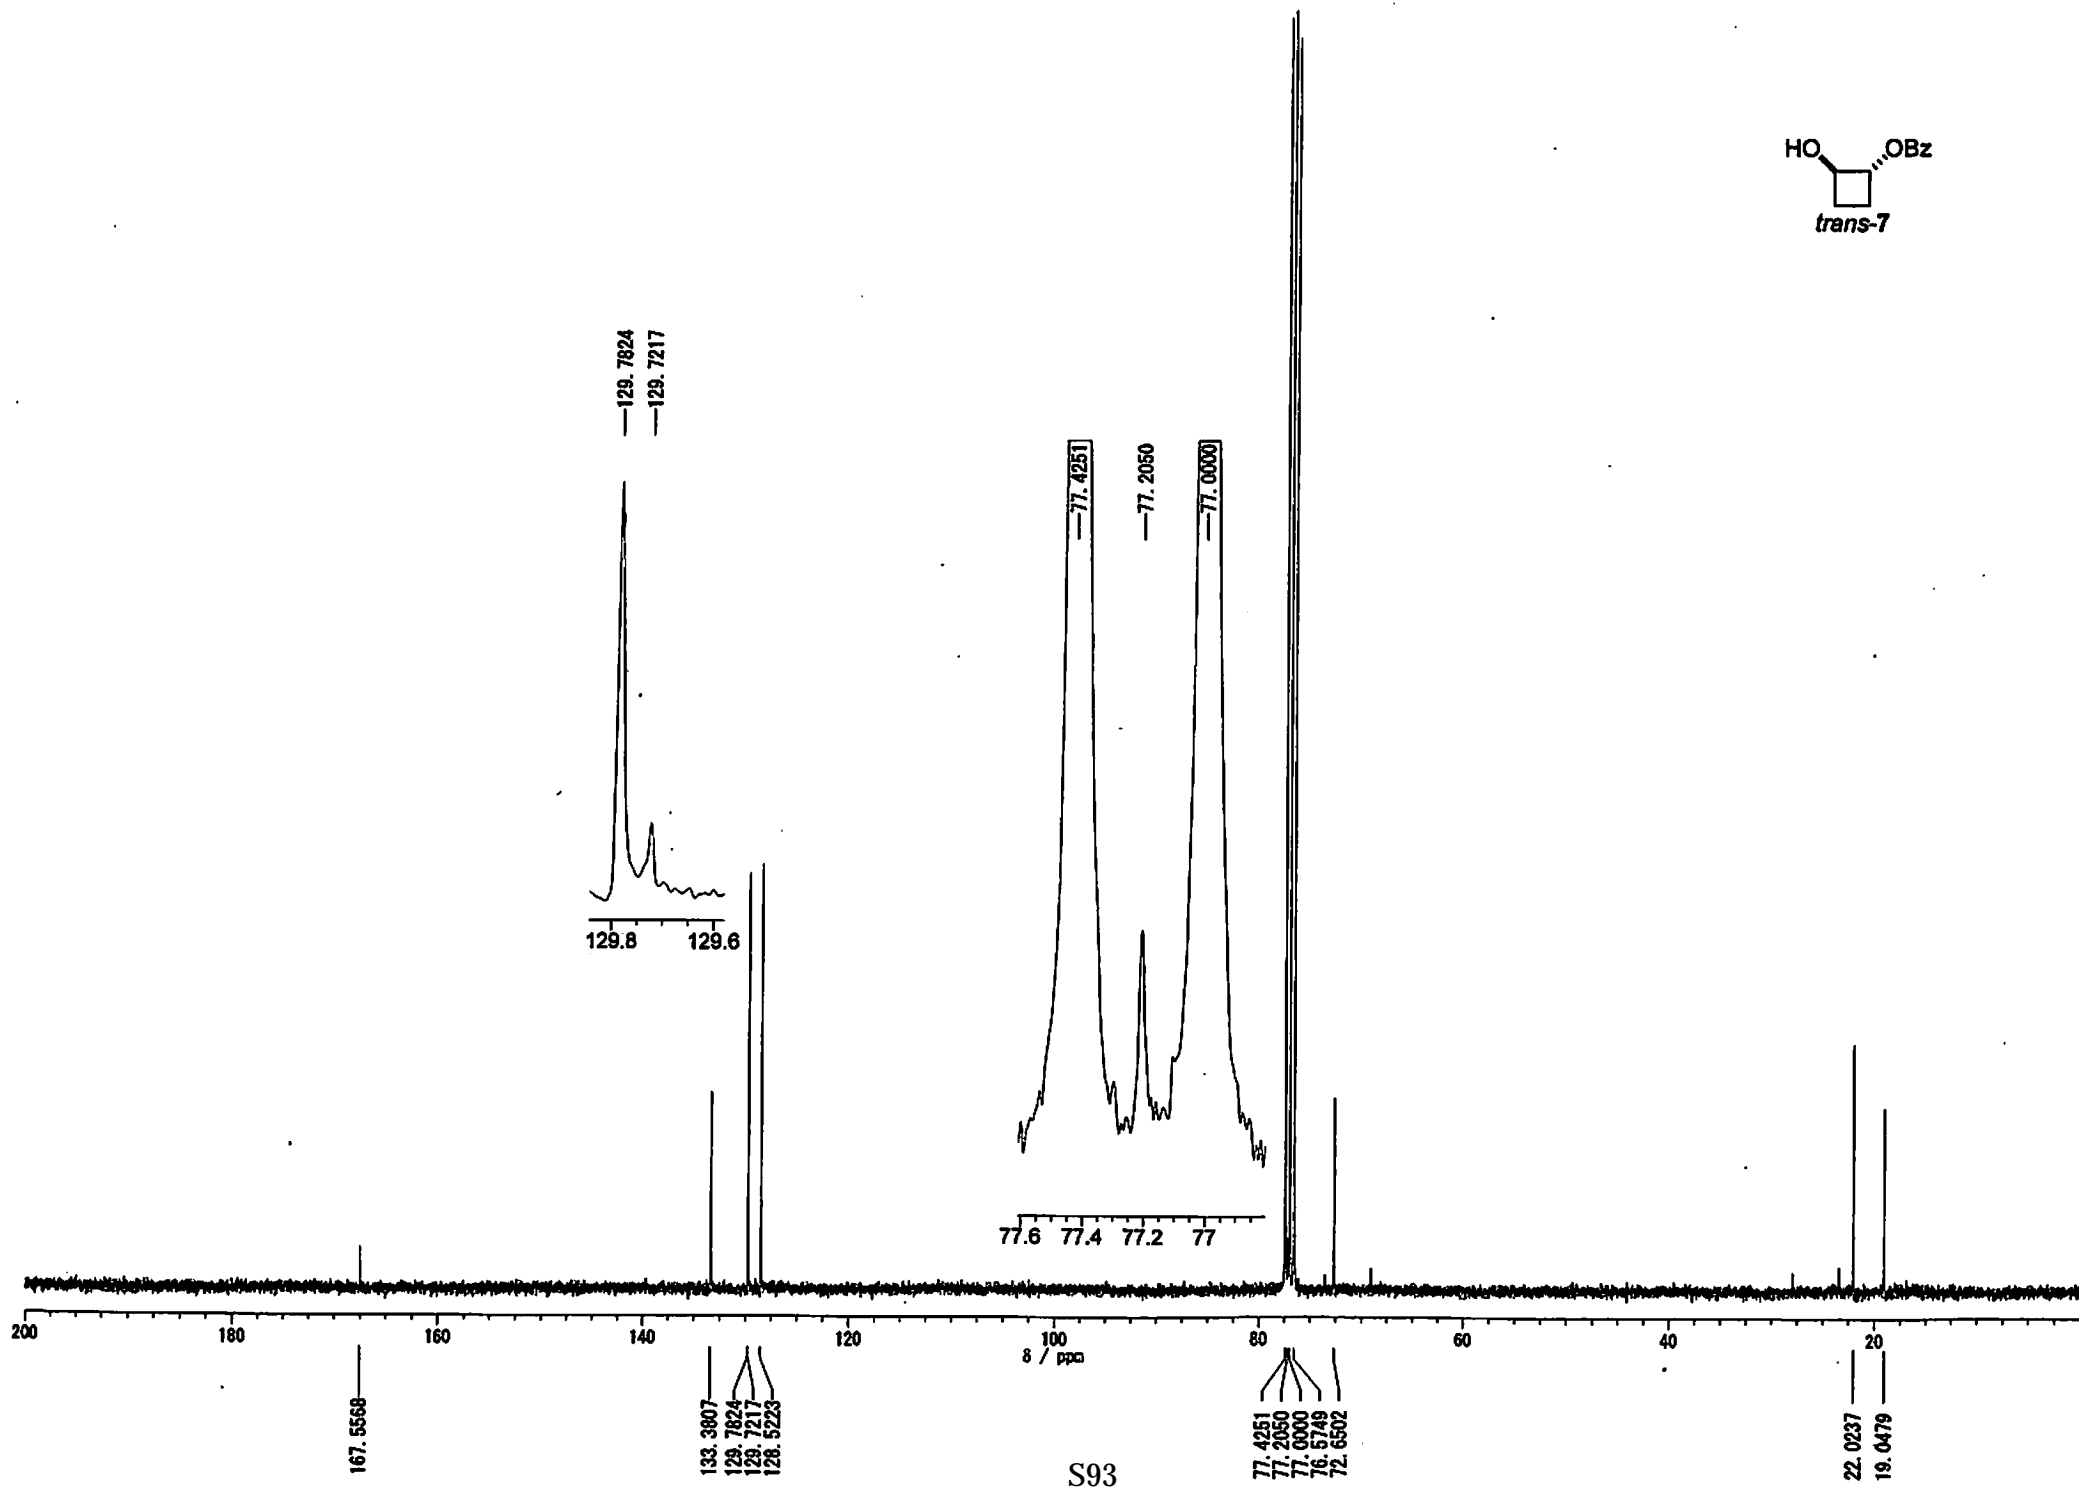

S93

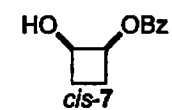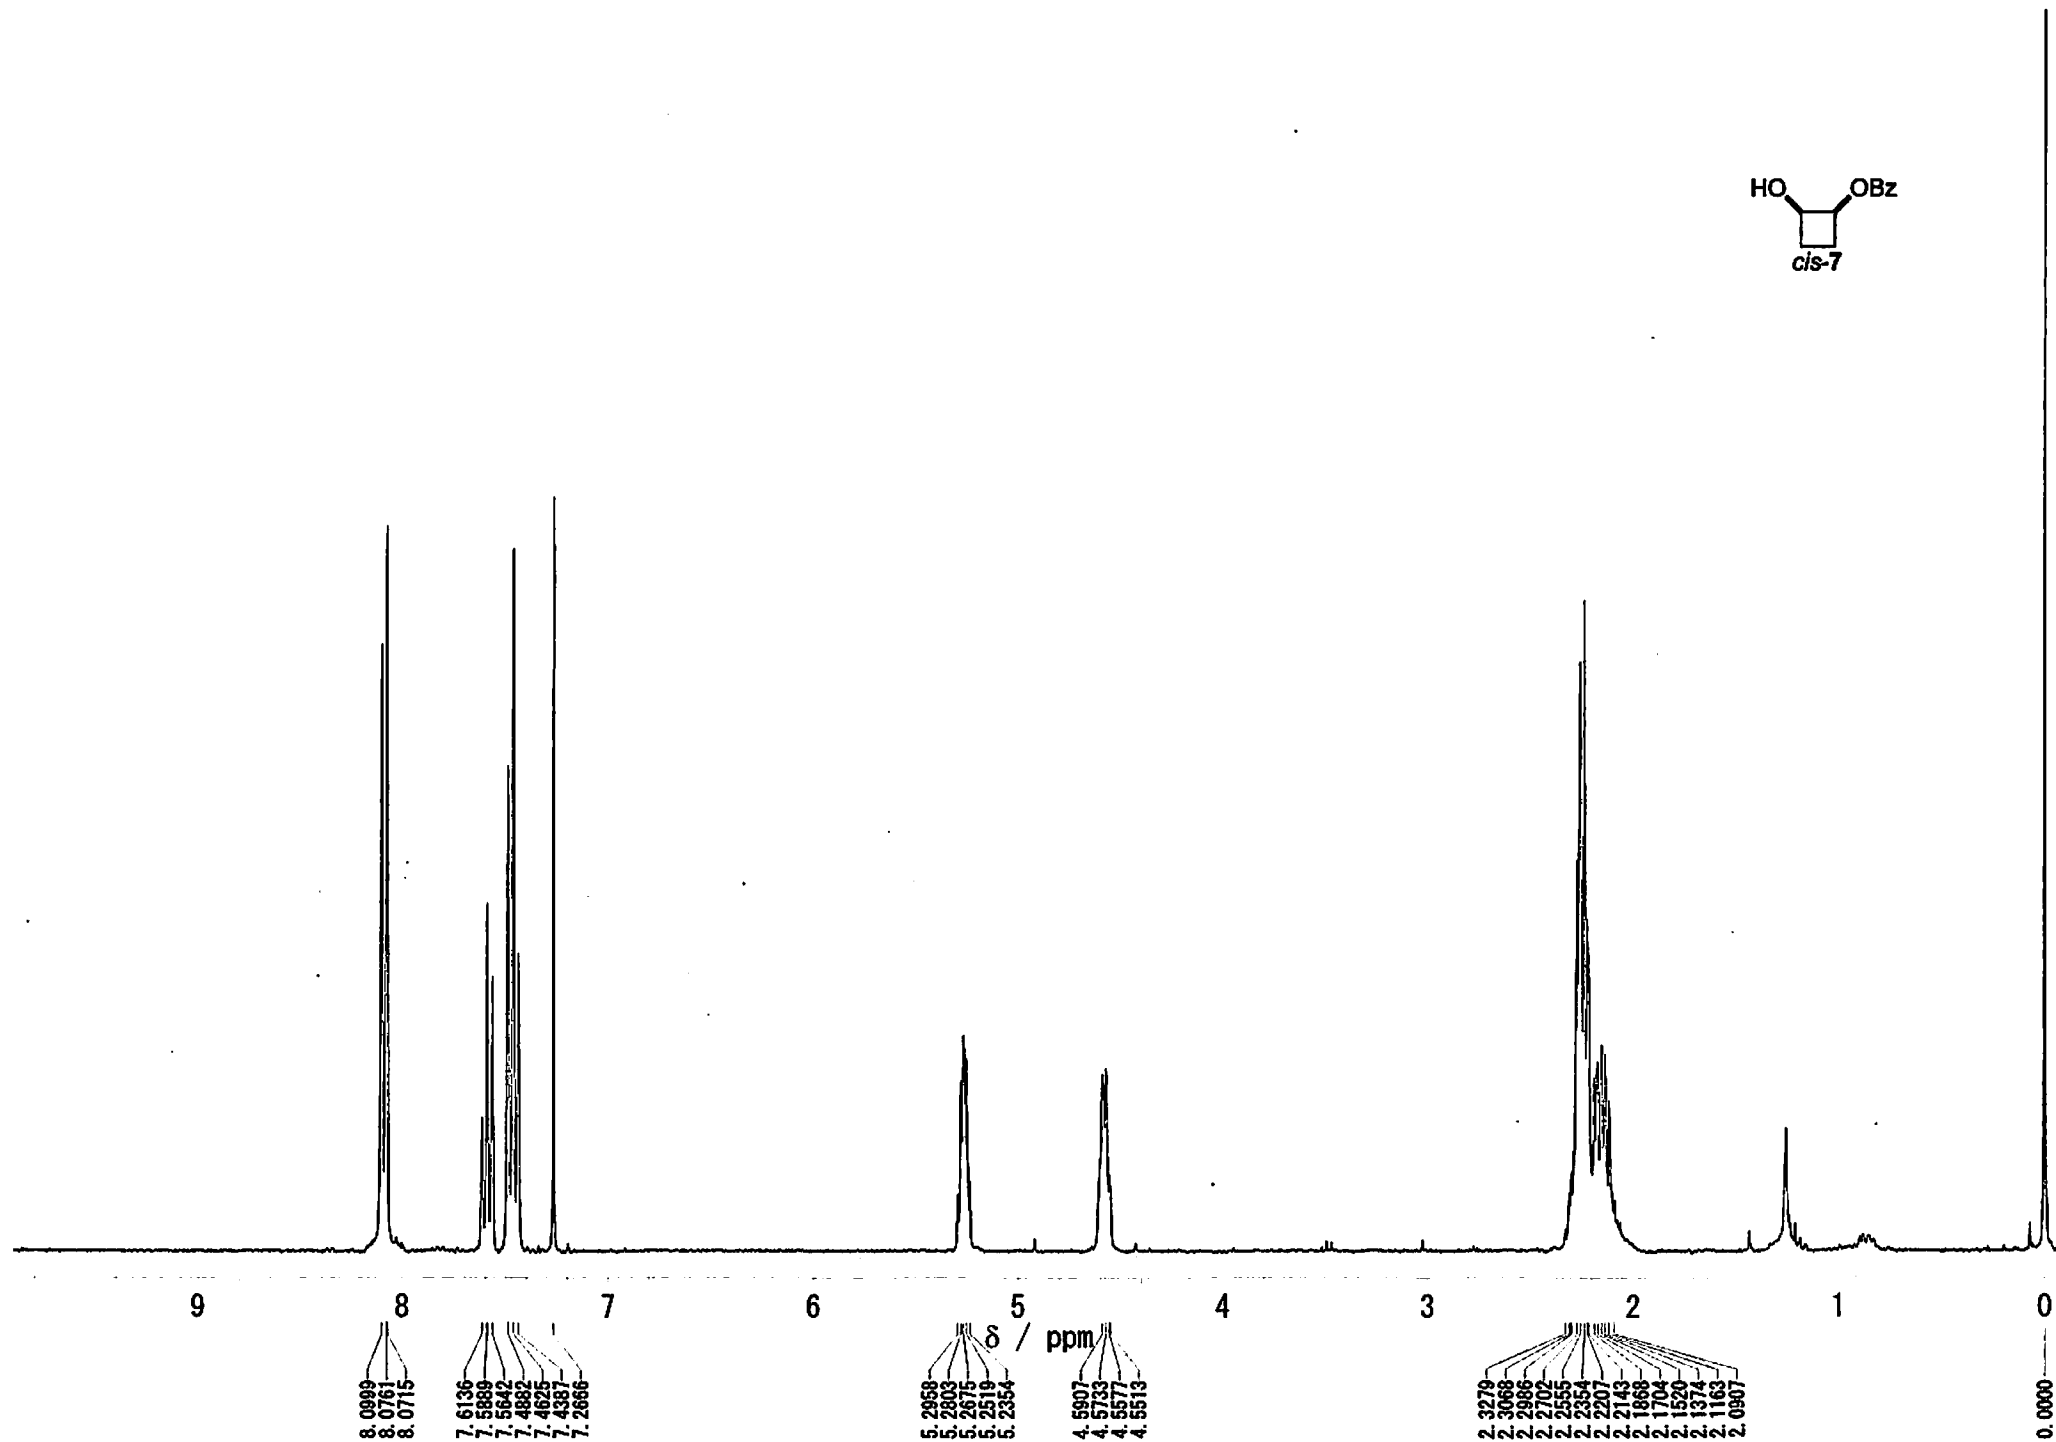

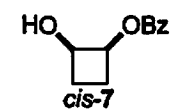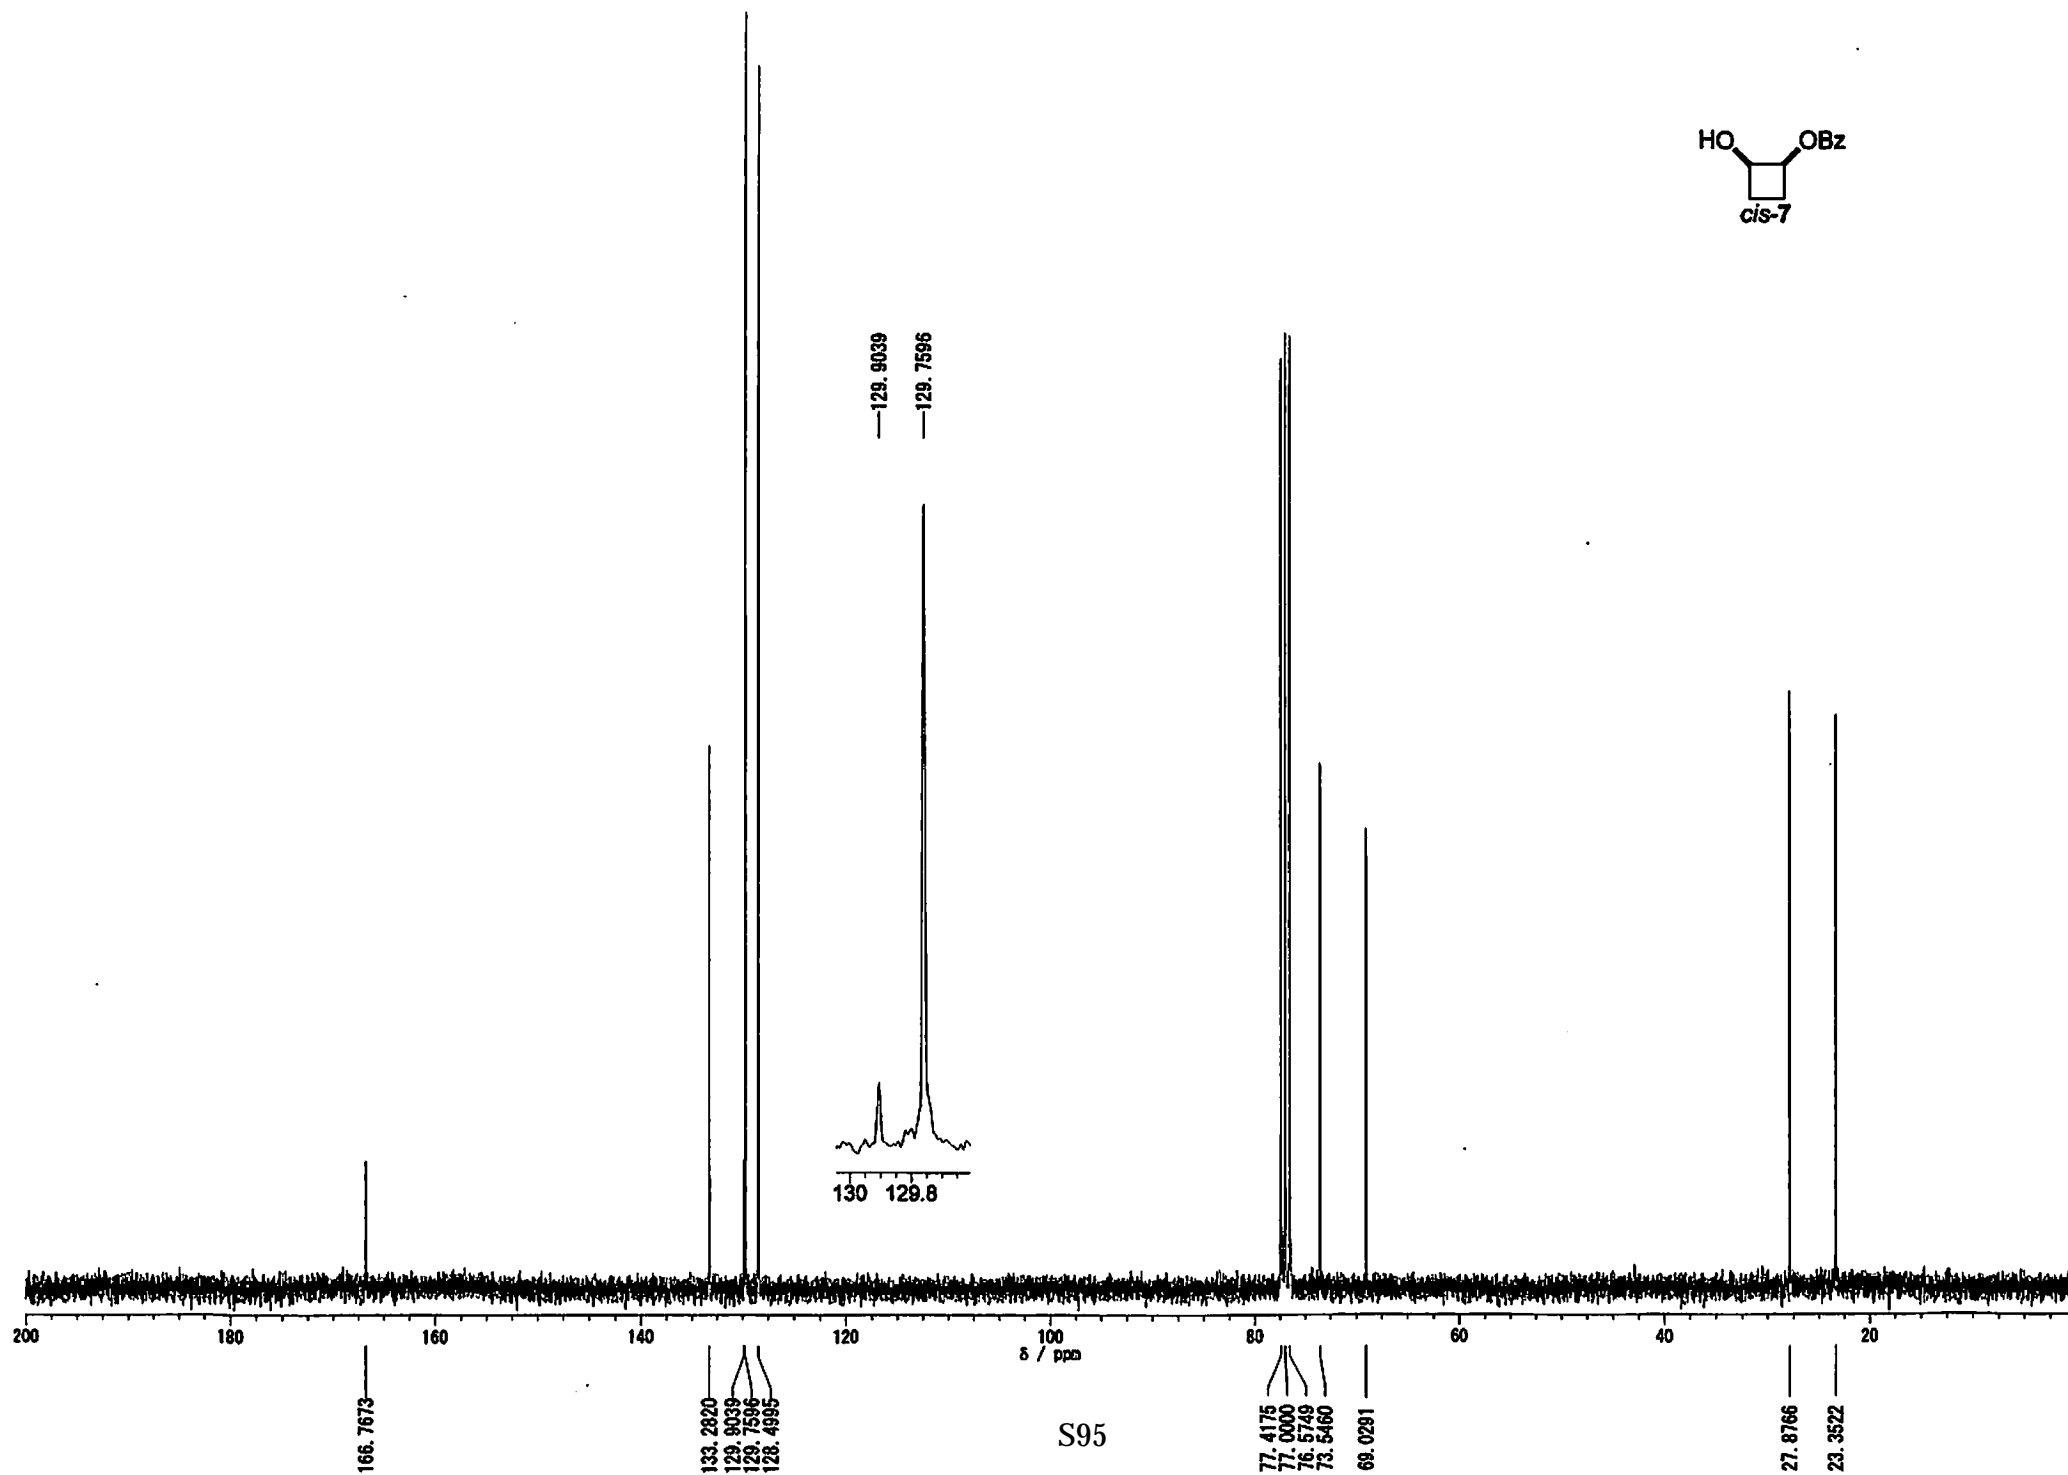

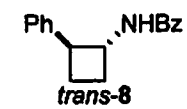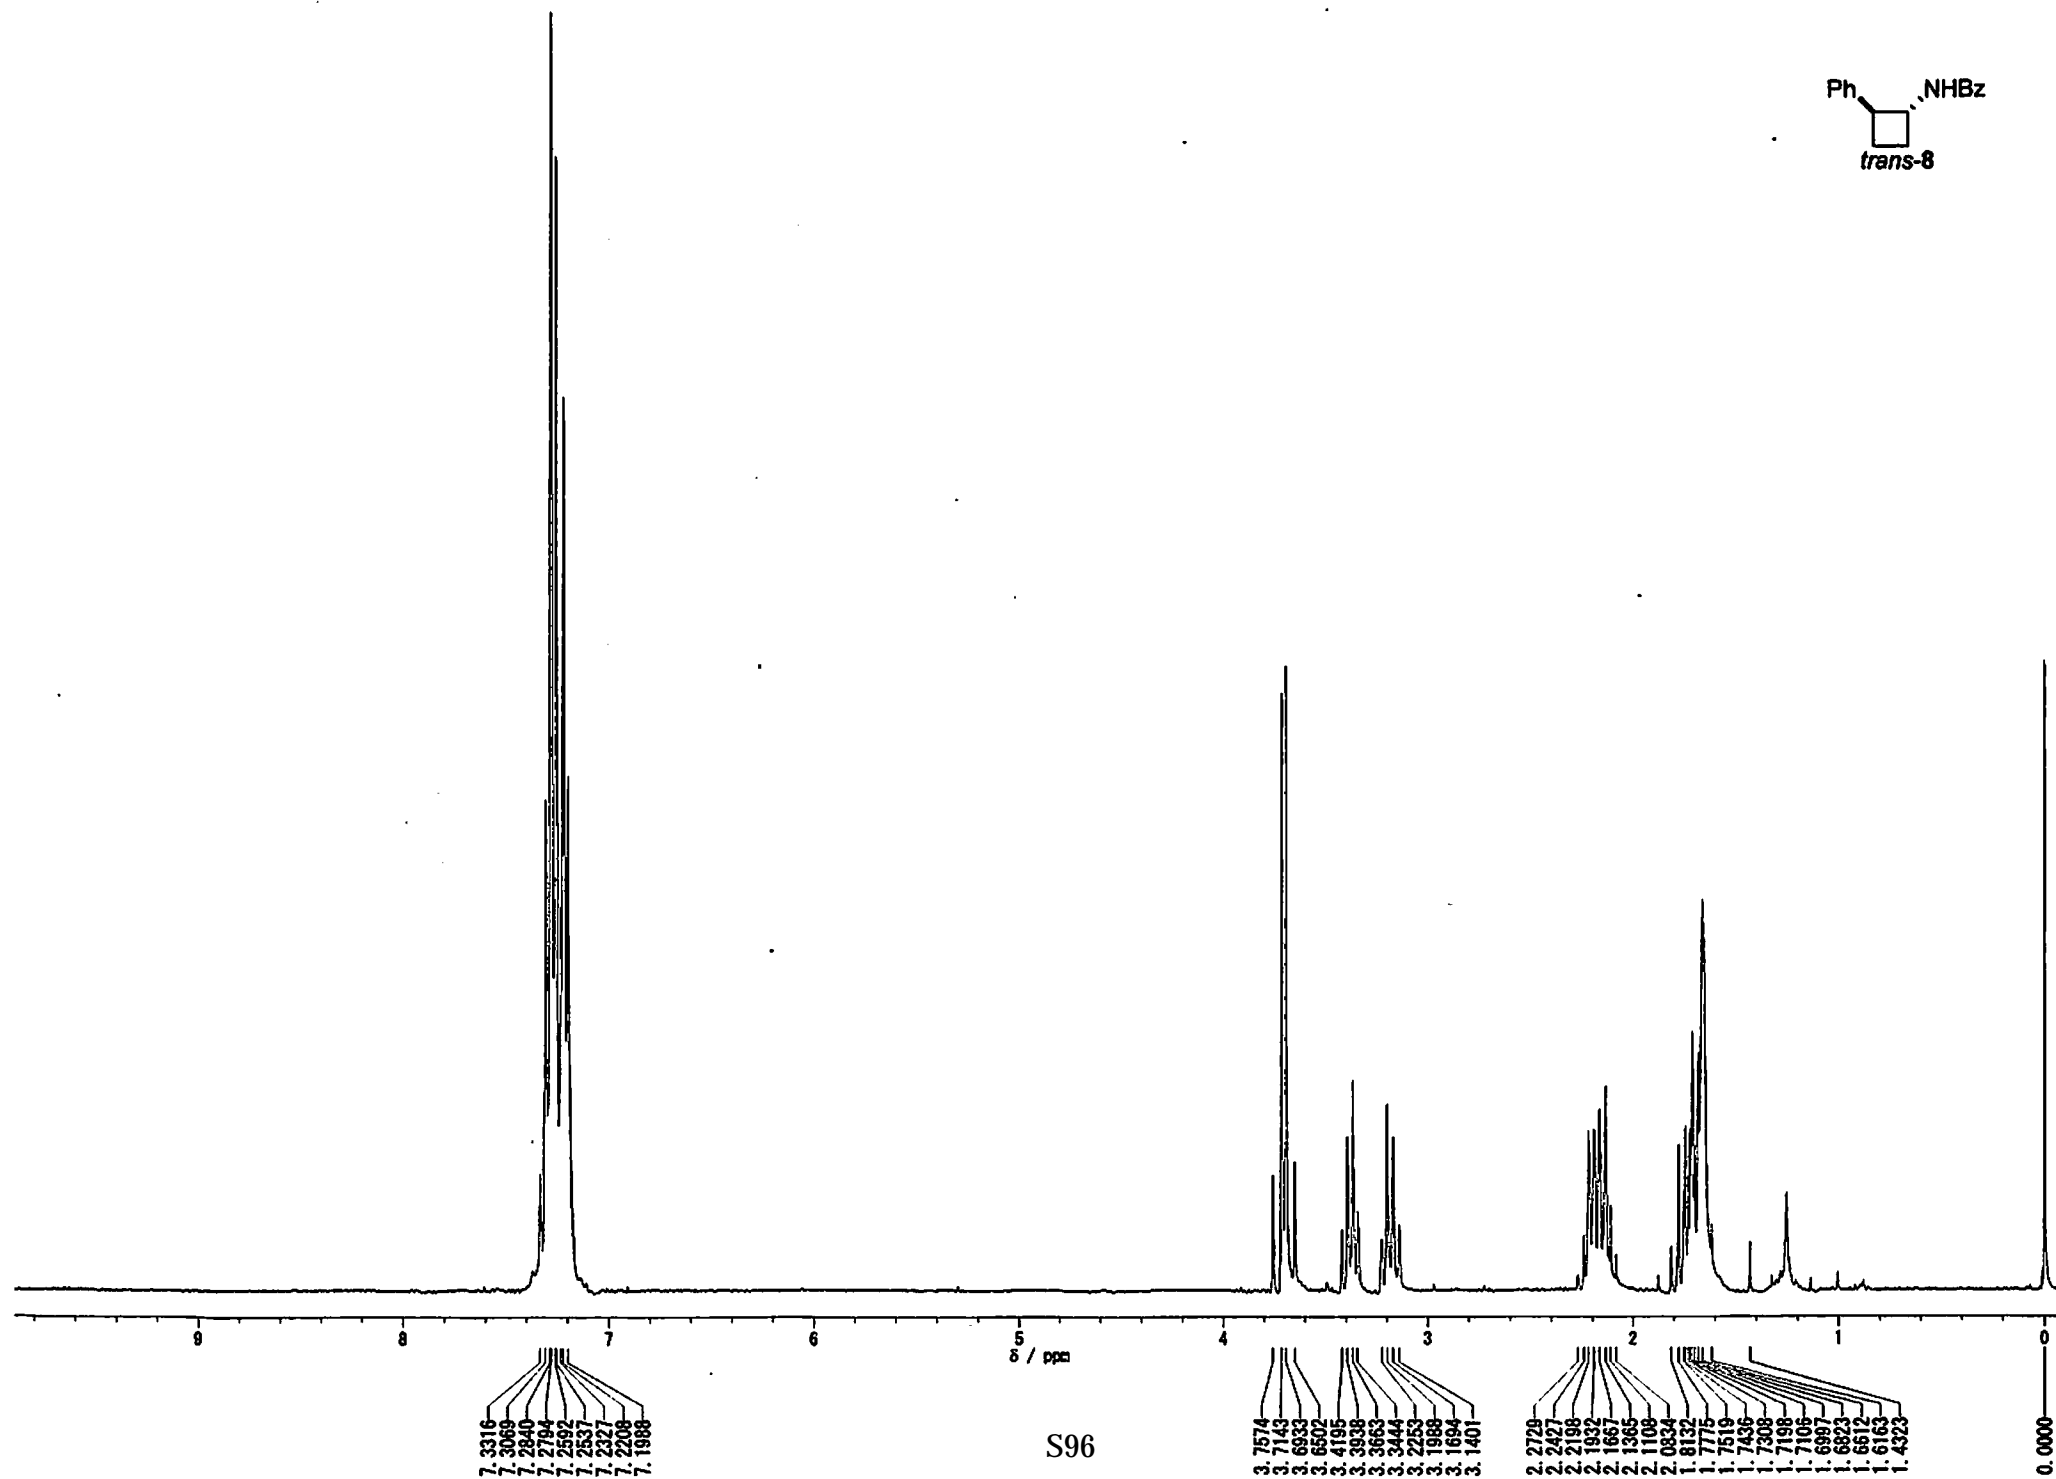

S96



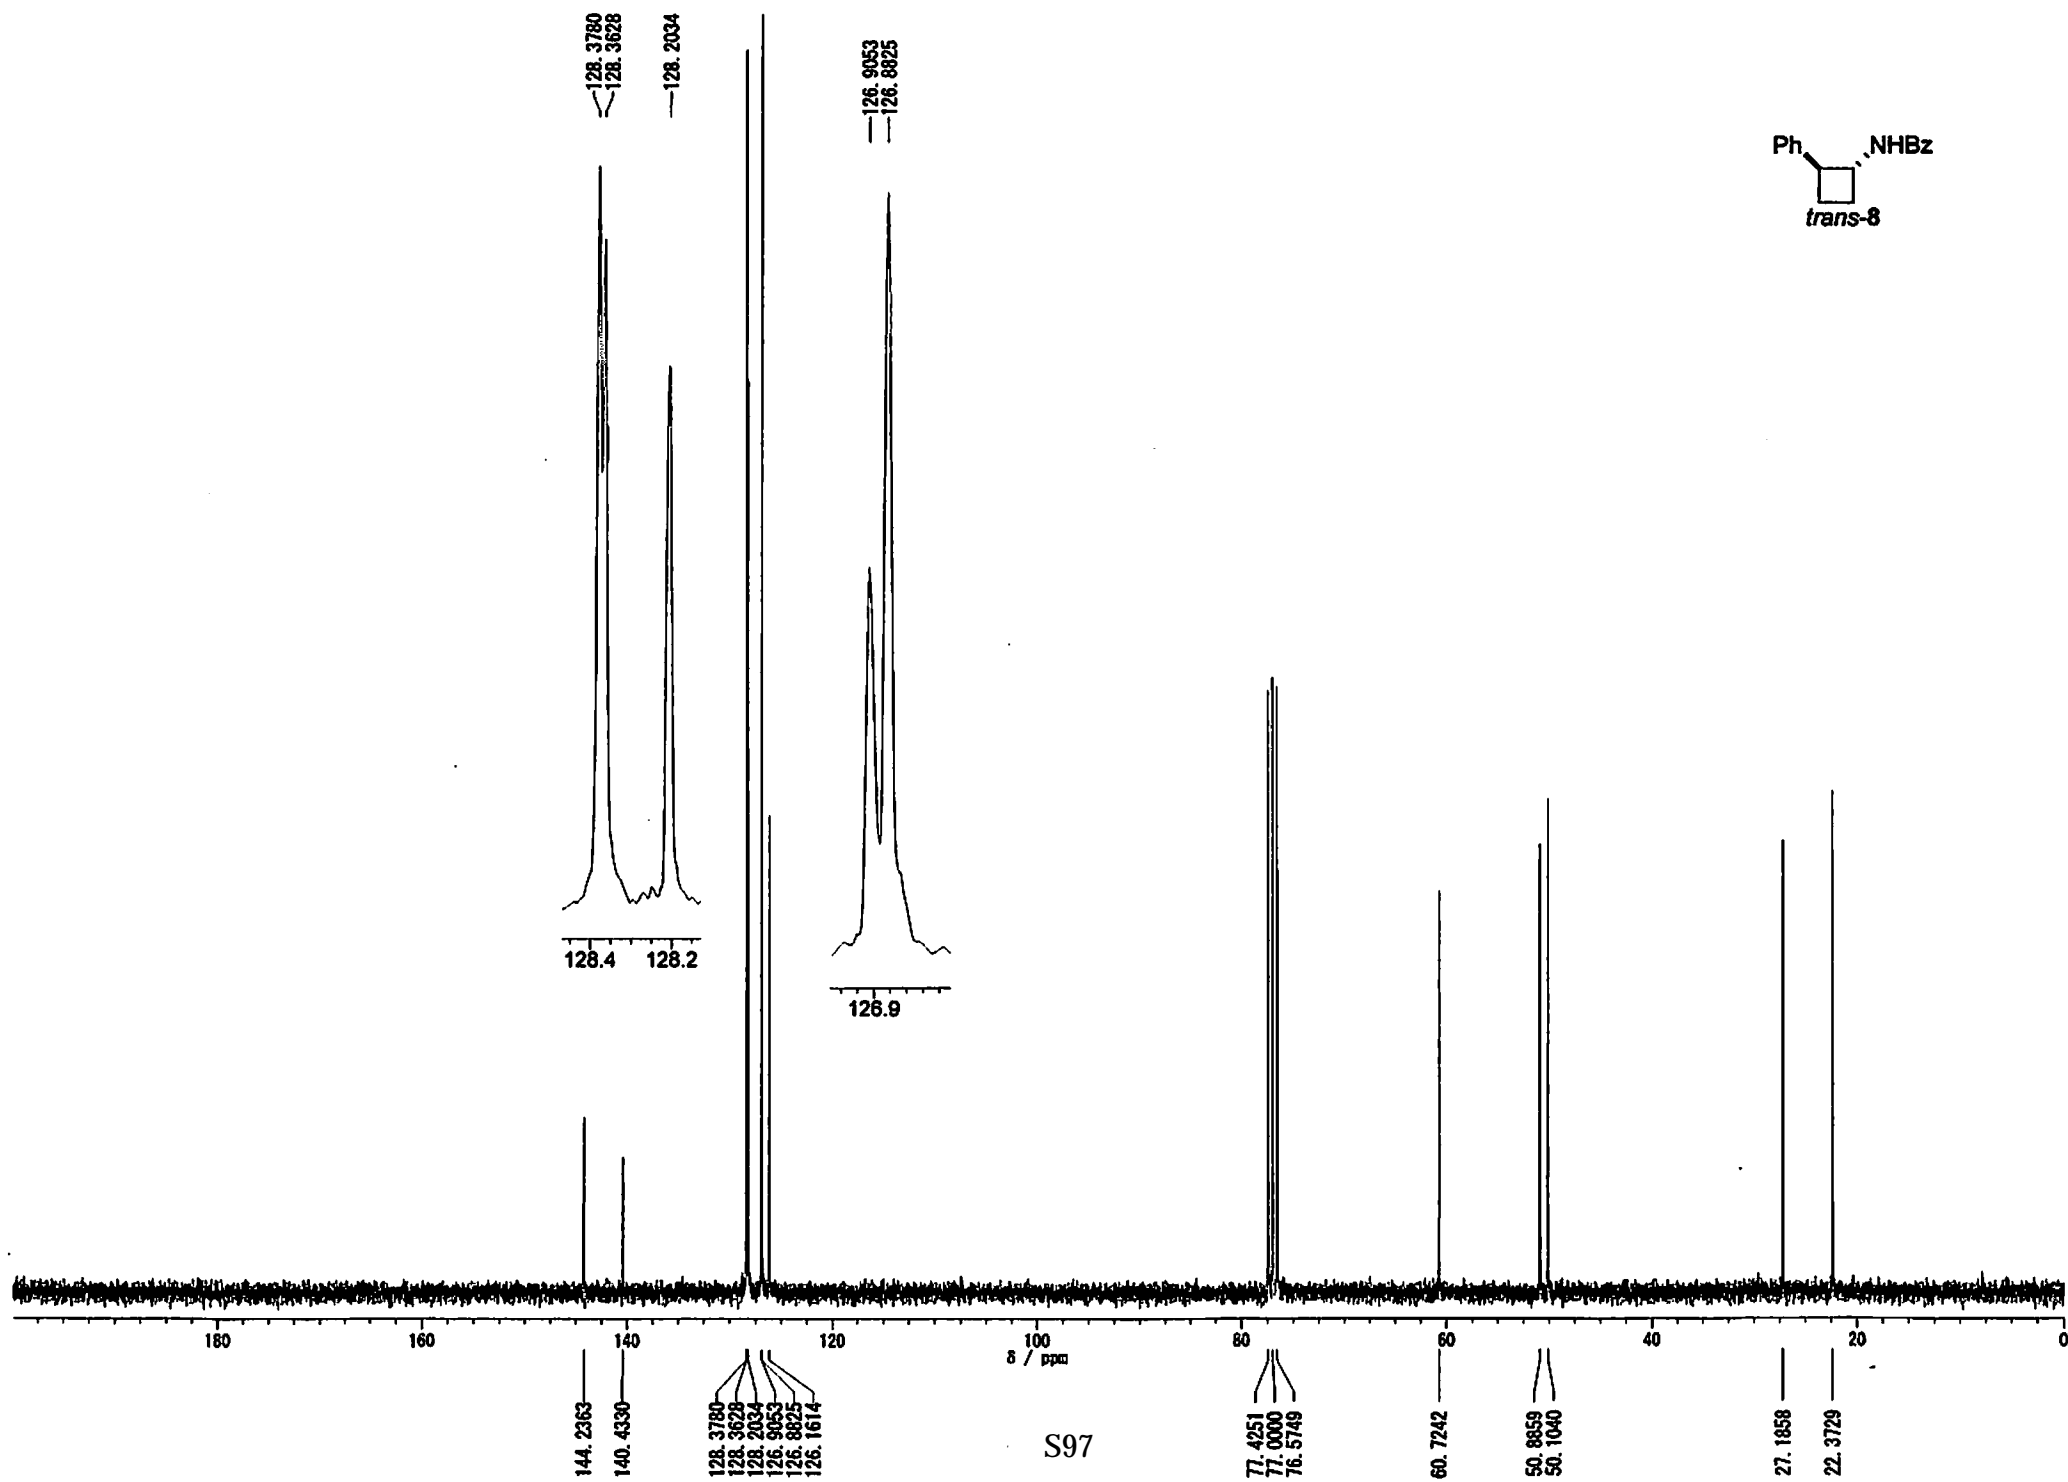

S97

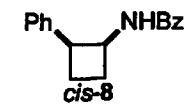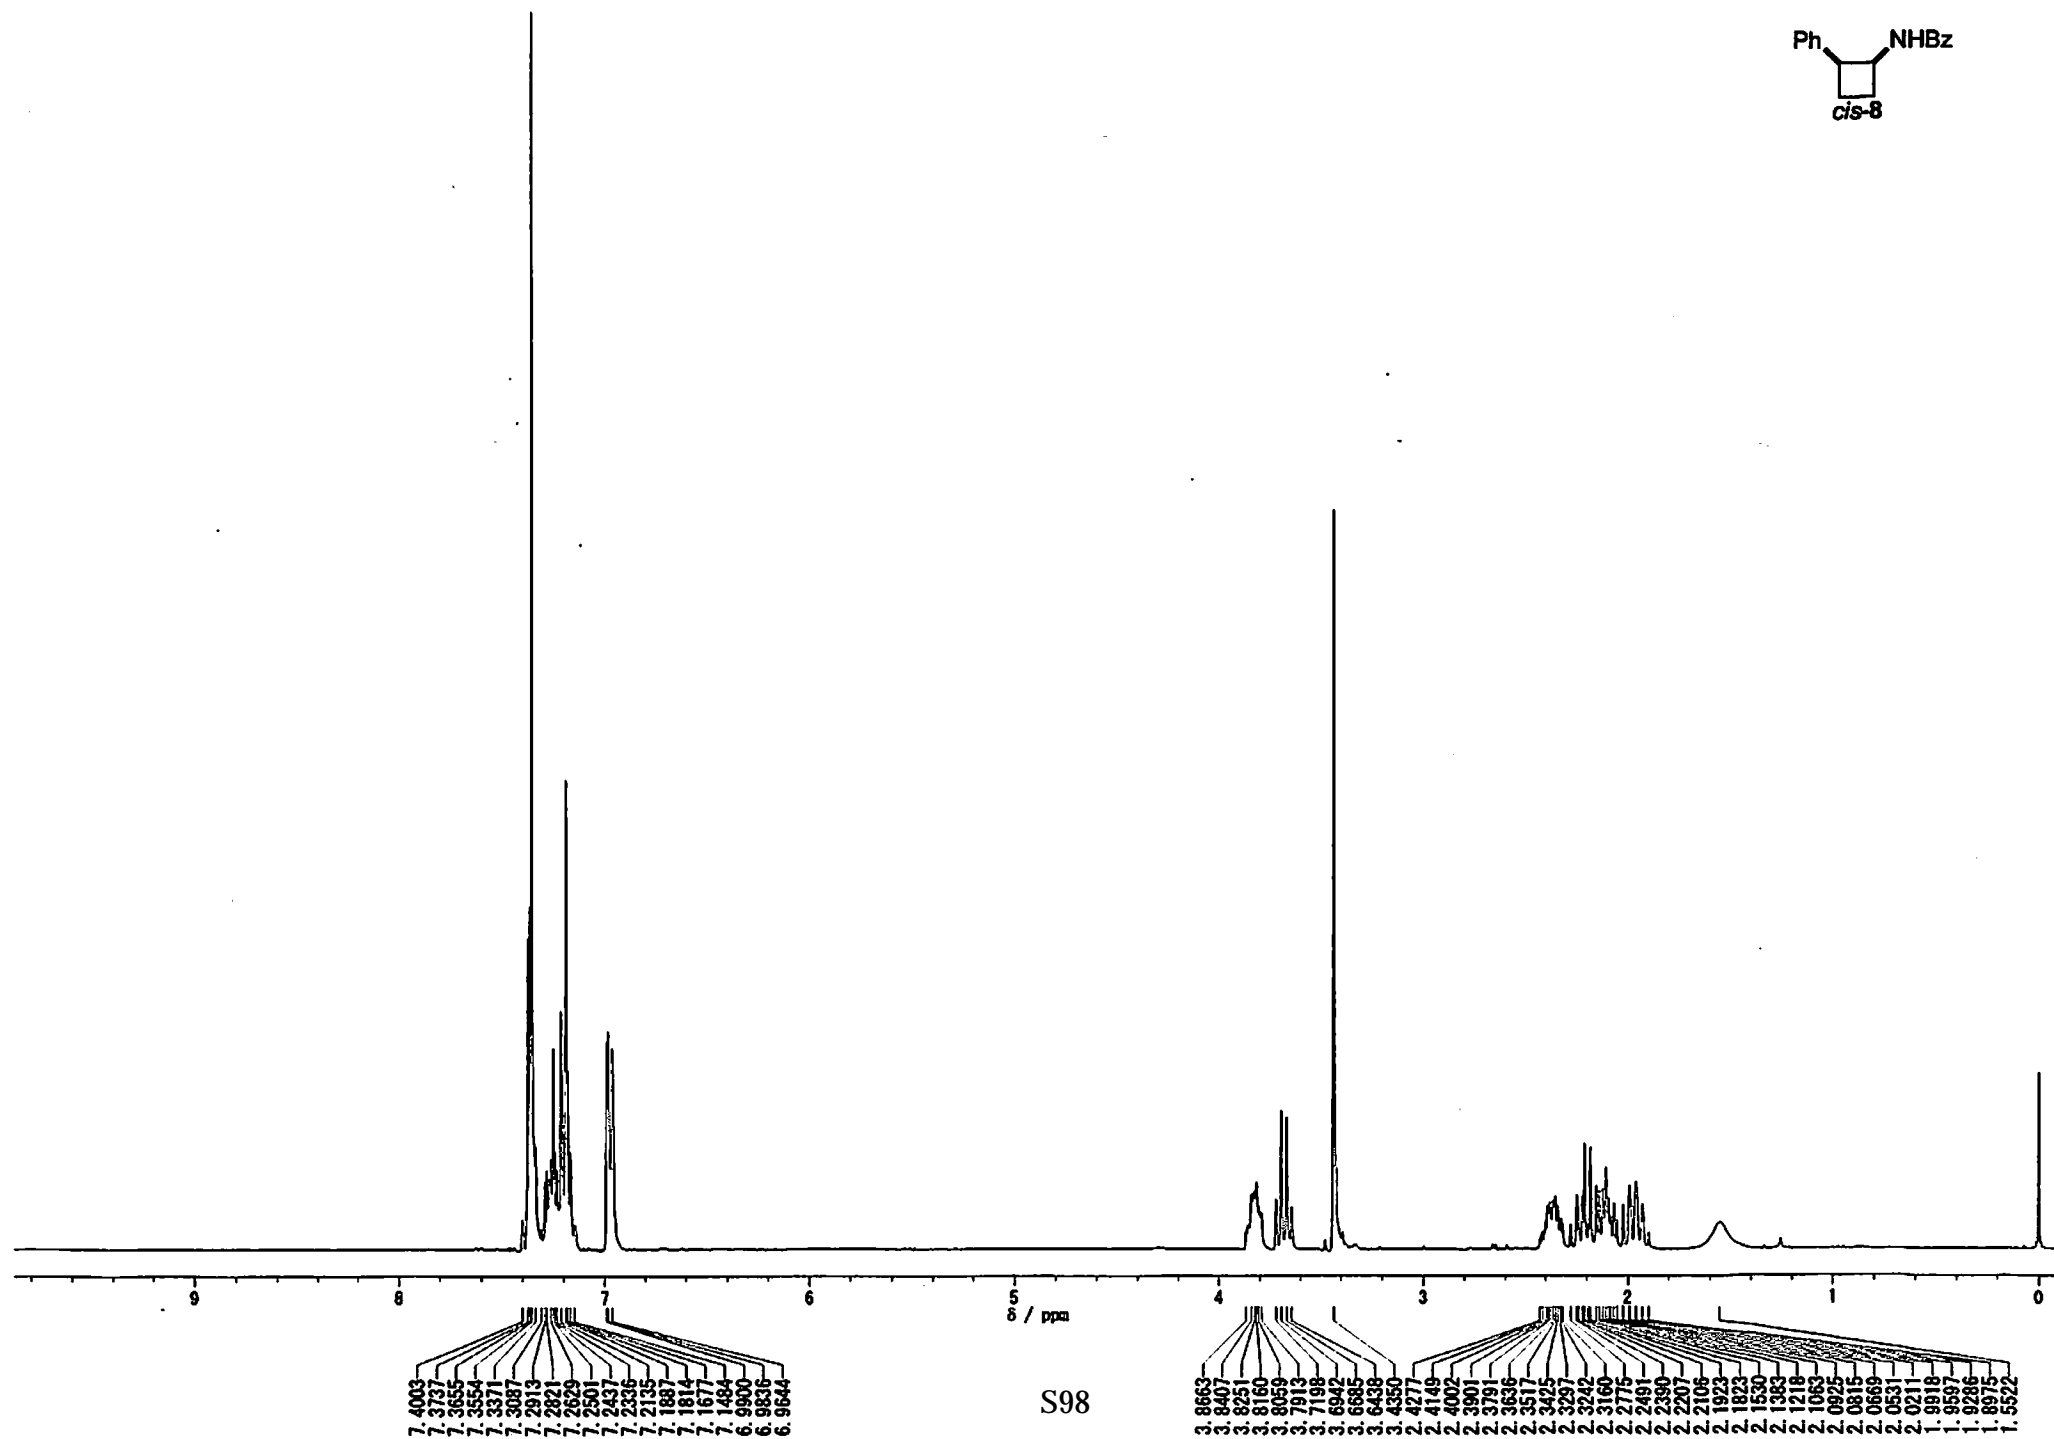

S98

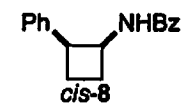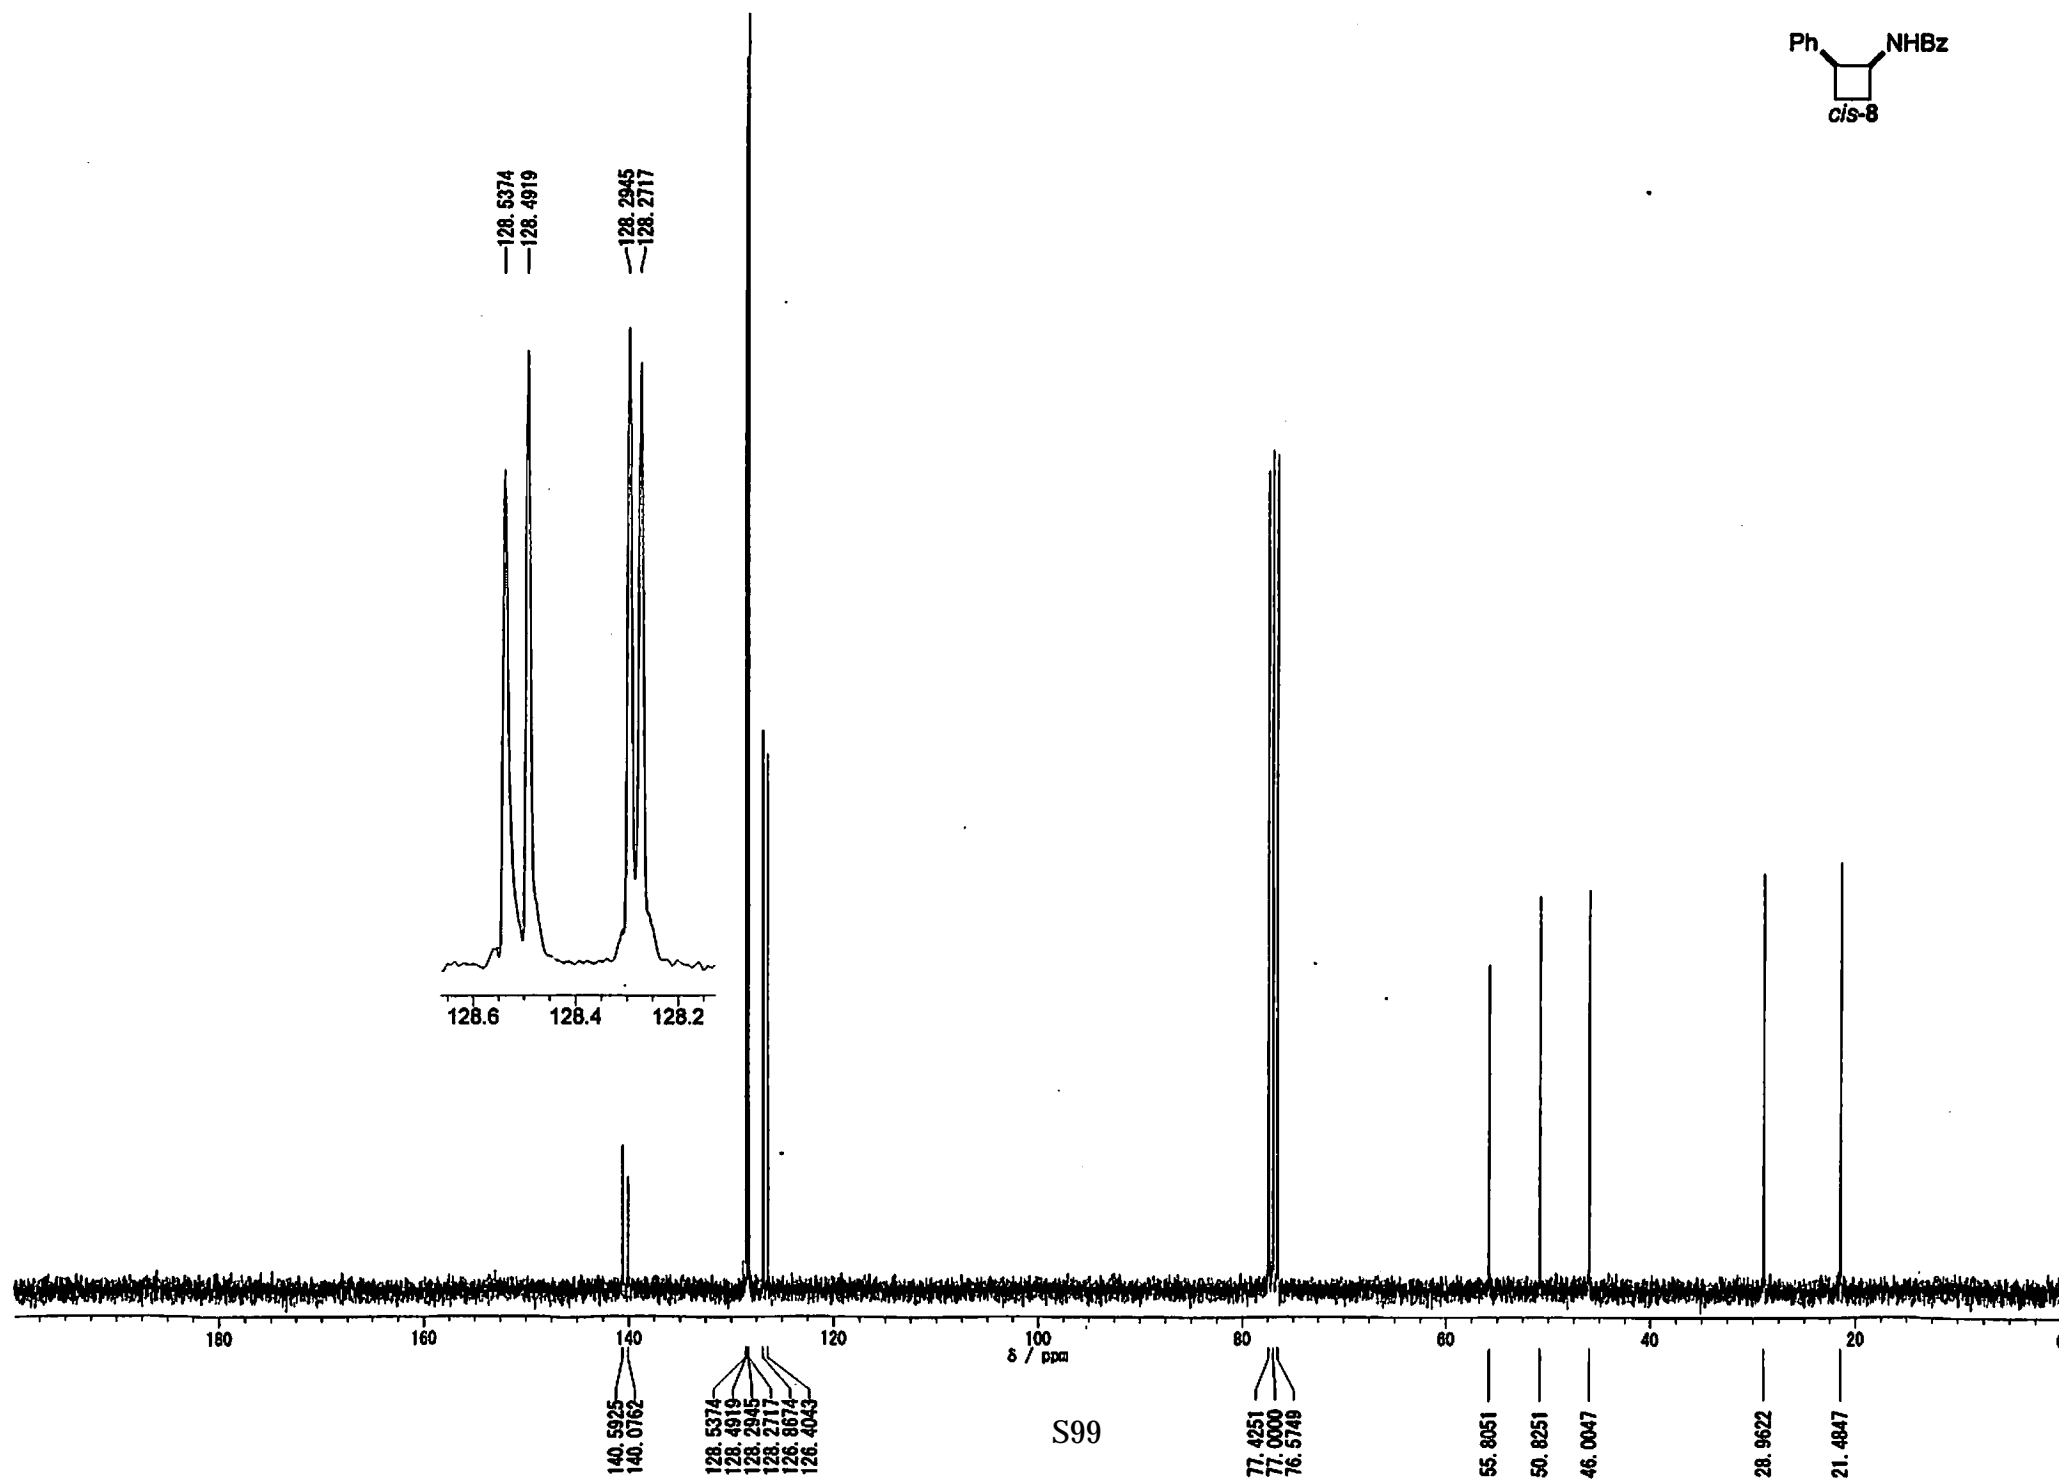

Supplement: Supplementary file 1 [file 4466863]
